# Supplementary material for: Comparative transcriptomics unveils the role of DELLA protein GAIP-B in cold tolerance of mango (Mangifera indica L.)
Source: Research Square preprint supplement (doi:10.21203/rs.3.rs-8246574/v1), 2025-12-22
Supplement: Supplementary file 1 [file 6bd7bd5ea49f0f3402021a7a.xlsx]

## Sheet: Table S2 All.sample.summary
Sample	Raw Reads	Clean Reads	Clean Base(G)	Error Rate(%)	Q20(%)	Q30(%)	GC Content(%)
jhm24-1	65207954	64135972	9.62	0.01	97.49	92.16	46.85
jhm24-2	50929008	49906650	7.49	0.02	97.1	91.08	47.21
jhm24-3	64770808	63542012	9.53	0.02	96.91	90.53	46.93
jhmCK-1	58231534	57241502	8.59	0.01	97.55	92.31	46.83
jhmCK-2	59900448	58978458	8.85	0.01	97.57	92.42	47.12
jhmCK-3	68816694	67999136	10.2	0.01	97.59	92.42	44.59
gqm24-1	65297492	64462516	9.67	0.01	97.66	92.65	44.59
gqm24-2	62828578	61863176	9.28	0.01	97.46	92.06	46.27
gqm24-3	54284934	53232186	7.98	0.02	97.08	91.05	47.26
gqmCK-1	64645690	63256152	9.49	0.02	96.7	90.13	46.99
gqmCK-2	54645792	53738174	8.06	0.02	97.14	91.19	47.04
gqmCK-3	71846260	70500878	10.58	0.01	97.43	92.2	46.96

## Sheet: bamStatSummary
Sample	Total Reads	Reads mapped	Unique mapped	Multi mapped	Read1 mapped	Read2 mapped	+' mapped	-' mapped
jhm24-1	64135972	59402585(92.62%)	56199672(87.63%)	3202913(4.99%)	28203881(43.98%)	27995791(43.65%)	28116962(43.84%)	28082710(43.79%)
jhm24-2	49906650	46005288(92.18%)	43901319(87.97%)	2103969(4.22%)	22080480(44.24%)	21820839(43.72%)	21962033(44.01%)	21939286(43.96%)
jhm24-3	63542012	58053818(91.36%)	54951691(86.48%)	3102127(4.88%)	27646041(43.51%)	27305650(42.97%)	27482543(43.25%)	27469148(43.23%)
jhmCK-1	57241502	52993569(92.58%)	50058165(87.45%)	2935404(5.13%)	25102645(43.85%)	24955520(43.60%)	25013554(43.70%)	25044611(43.75%)
jhmCK-2	58978458	54277500(92.03%)	49932959(84.66%)	4344541(7.37%)	25048111(42.47%)	24884848(42.19%)	24955517(42.31%)	24977442(42.35%)
jhmCK-3	67999136	63540321(93.44%)	59568434(87.60%)	3971887(5.84%)	29862424(43.92%)	29706010(43.69%)	29753362(43.76%)	29815072(43.85%)
gqm24-1	64462516	60382312(93.67%)	57210431(88.75%)	3171881(4.92%)	28695231(44.51%)	28515200(44.24%)	28610315(44.38%)	28600116(44.37%)
gqm24-2	61863176	57703539(93.28%)	54739516(88.48%)	2964023(4.79%)	27455515(44.38%)	27284001(44.10%)	27375006(44.25%)	27364510(44.23%)
gqm24-3	53232186	49181044(92.39%)	46531399(87.41%)	2649645(4.98%)	23364012(43.89%)	23167387(43.52%)	23289888(43.75%)	23241511(43.66%)
gqmCK-1	63256152	58784821(92.93%)	55769550(88.16%)	3015271(4.77%)	28096359(44.42%)	27673191(43.75%)	27872114(44.06%)	27897436(44.10%)
gqmCK-2	53738174	49508126(92.13%)	45502427(84.67%)	4005699(7.45%)	22874718(42.57%)	22627709(42.11%)	22724525(42.29%)	22777902(42.39%)
gqmCK-3	70500878	66177523(93.87%)	62270379(88.33%)	3907144(5.54%)	31257833(44.34%)	31012546(43.99%)	31154377(44.19%)	31116002(44.14%)

## Sheet: gqmCK-vs-gqm24
id	gqmCK-1_count	gqmCK-2_count	gqmCK-3_count	gqm24-1_count	gqm24-2_count	gqm24-3_count	gqmCK-1_fpkm	gqmCK-2_fpkm	gqmCK-3_fpkm	gqm24-1_fpkm	gqm24-2_fpkm	gqm24-3_fpkm	gqmCK_mean	gqm24_mean	log2(fc)	PValue	FDR	chr	start	end	strand	gene_name	gene_description	KEGG	KEGG pathway	NR	Swissprot	Tremble	KOG	GO	Pfam	TF-Family	TF-Category	TF-Classification
LOC123214435	39	56	53	13224	15417	10235	0.6374	1.1287	0.7798	212.935	258.332	200.751	0.848633333333333	224.005866666667	8.04417945419032	2.79274349655091e-90	9.01302108641876e-86	NC_058140.1	3087663	3093459	-	LOC123214435	--	K12116 flavin-binding kelch repeat F-box protein 1 | (RefSeq) adagio protein 3-like (A)	ko04712: Circadian rhythm - plant	adagio protein 3-like [Mangifera indica]	ADO3_ARATH RecName: Full=Adagio protein 3; AltName: Full=F-box only protein 2a; Short=FBX2a; AltName: Full=Flavin-binding kelch repeat F-box protein 1;	A0A126X4B9_TOXRA SubName: Full=Putative LOV domain-containing protein {ECO:0000313|EMBL:AML79535.1};	--	GO:0005829,cytosol; GO:0005634,nucleus; GO:0019005,SCF ubiquitin ligase complex; GO:0009881,photoreceptor activity; GO:0007623,circadian rhythm; GO:0009908,flower development; GO:2001007,negative regulation of cellulose biosynthetic process; GO:0009911,positive regulation of flower development; GO:0016567,protein ubiquitination; GO:0010468,regulation of gene expression; GO:0006355,regulation of D…	PF13418.9:Galactose oxidase, central domain	--	--	--
LOC123196846	55	67	50	29071	43349	19105	3.0719	4.615	2.5141	1599.73	2482.34	1280.62	3.40033333333333	1787.56	9.03810243509243	1.16177545415164e-78	1.8746989615918e-74	NC_058150.1	4532946	4533753	-	LOC123196846	--	--	--	light-regulated protein 1, chloroplastic-like [Mangifera indica]	LIRP1_ARATH RecName: Full=Light-regulated protein 1, chloroplastic {ECO:0000303|PubMed:8932388}; AltName: Full=Protein CCR-LIKE, chloroplastic {ECO:0000303|PubMed:16055688}; Flags: Precursor;	A0A438JD14_VITVI SubName: Full=Light-regulated protein 1, chloroplastic {ECO:0000313|EMBL:RVX06843.1};	--	GO:0009507,chloroplast; GO:0009941,chloroplast envelope; GO:0009570,chloroplast stroma; GO:0098807,chloroplast thylakoid membrane protein complex; GO:0005829,cytosol; GO:0007623,circadian rhythm; GO:0008150,biological_process; GO:0048511,rhythmic process; GO:0005575,cellular_component; GO:0005622,intracellular anatomical structure; GO:0005737,cytoplasm; GO:0009536,plastid; GO:0043226,organelle; G…	PF07207.14:Light regulated protein Lir1	--	--	--
LOC123200014	13577	23427	32700	209	267	224	697.416	1484.1	1512.21	10.5775	14.0619	13.8093	1231.24186666667	12.8162333333333	-6.586	1.87236142903747e-59	2.01422401331088e-55	NC_058138.1	16560538	16561222	-	LOC123200014	--	K13993 HSP20 family protein | (RefSeq) 18.2 kDa class I heat shock protein-like (A)	ko04141: Protein processing in endoplasmic reticulum	18.2 kDa class I heat shock protein-like [Mangifera indica]	HSP12_MEDSA RecName: Full=18.2 kDa class I heat shock protein;	A0A0H3UZ51_MANIN SubName: Full=Heat-shock protein 17.6 {ECO:0000313|EMBL:AJA79008.1};	Molecular chaperone (small heat-shock protein Hsp26/Hsp42)	GO:0005737,cytoplasm; GO:0005575,cellular_component; GO:0005622,intracellular anatomical structure; GO:0110165,cellular anatomical entity	PF00011.24:Hsp20/alpha crystallin family	--	--	--
LOC123204306	9	25	8	18649	18516	9088	0.3939	1.3493	0.3152	804.132	830.834	477.337	0.686133333333333	704.100766666667	10.0030772417865	7.15707010726392e-58	5.3582765061376e-54	NC_058138.1	16669877	16671025	+	LOC123204306	--	--	--	uncharacterized protein LOC123204306 [Mangifera indica]	--	A0A2R6QJ75_ACTCC SubName: Full=4-hydroxy-tetrahydrodipicolinate synthase {ECO:0000313|EMBL:PSS09455.1};	--	--	--	--	--	--
LOC123212734	10	8	21	2594	2824	1606	0.2628	0.2593	0.4968	67.161	76.0864	50.6498	0.339633333333333	64.6324	7.57213569486504	8.30148499695969e-58	5.3582765061376e-54	NC_058140.1	12600731	12605762	-	LOC123212734	--	--	--	cold-regulated protein 27-like isoform X1 [Mangifera indica]	COR27_ARATH RecName: Full=Cold-regulated protein 27 {ECO:0000303|PubMed:19566593};	A0A5C7I4V4_9ROSI SubName: Full=Uncharacterized protein {ECO:0000313|EMBL:TXG64301.1};	--	GO:0005634,nucleus; GO:0045892,negative regulation of DNA-templated transcription; GO:0042752,regulation of circadian rhythm; GO:2000028,regulation of photoperiodism, flowering; GO:0009737,response to abscisic acid; GO:0009646,response to absence of light; GO:0009637,response to blue light; GO:0009409,response to cold; GO:0010114,response to red light; GO:0009615,response to virus; GO:0048511,rhy…	--	--	--	--
LOC123224603	94	56	60	8497	7641	4538	0.8985	0.6602	0.5163	80.0253	74.8872	52.0609	0.691666666666667	68.9911333333333	6.6401902193297	5.72276127481926e-53	3.0781779103707e-49	NC_058137.1	2998907	3003995	-	LOC123224603	--	K05391 cyclic nucleotide gated channel, plant | (RefSeq) protein CNGC15b-like (A)	ko04626: Plant-pathogen interaction	protein CNGC15b-like [Mangifera indica]	CN15C_MEDTR RecName: Full=Protein CNGC15c {ECO:0000303|PubMed:27230377}; AltName: Full=Cyclic nucleotide-gated ion channel protein 15 c {ECO:0000303|PubMed:27230377};	V4SMV7_CITCL RecName: Full=Cyclic nucleotide-binding domain-containing protein {ECO:0000259|PROSITE:PS50042};	K+-channel ERG and related proteins, contain PAS/PAC sensor domain	GO:0016021,integral component of membrane; GO:0031965,nuclear membrane; GO:0044325,transmembrane transporter binding; GO:0005249,voltage-gated potassium channel activity; GO:0003674,molecular_function; GO:0005488,binding; GO:0005515,protein binding; GO:0005215,transporter activity; GO:0005216,ion channel activity; GO:0005244,voltage-gated ion channel activity; GO:0005261,cation channel activity; …	PF00520.34:Ion transport protein	--	--	--
LOC123204413	56454	52741	62584	2824	3149	2374	613.475	706.82	612.267	30.2354	35.0848	30.9611	644.187266666667	32.0937666666667	-4.32712	2.10692991674415e-52	9.71384988615486e-49	NC_058156.1	9008997	9013356	+	LOC123204413	--	K03695 ATP-dependent Clp protease ATP-binding subunit ClpB | (RefSeq) chaperone protein ClpB1 (A)	--	chaperone protein ClpB1 [Mangifera indica]	CLPB1_ARATH RecName: Full=Chaperone protein ClpB1; AltName: Full=ATP-dependent Clp protease ATP-binding subunit ClpB homolog 1; AltName: Full=Casein lytic proteinase B1; AltName: Full=Heat shock protein 101; AltName: Full=Protein DEFECTIVE IN LONG-TERM ACQUIRED THERMOTOLERANCE {ECO:0000303|PubMed:23439916};	A0A059A5G2_EUCGR RecName: Full=Clp R domain-containing protein {ECO:0000259|PROSITE:PS51903};	Chaperone HSP104 and related ATP-dependent Clp proteases	GO:0009941,chloroplast envelope; GO:0009570,chloroplast stroma; GO:0005737,cytoplasm; GO:0005829,cytosol; GO:0005634,nucleus; GO:0005524,ATP binding; GO:0016887,ATP hydrolysis activity; GO:0034605,cellular response to heat; GO:0071456,cellular response to hypoxia; GO:0045727,positive regulation of translation; GO:0043335,protein unfolding; GO:0009408,response to heat; GO:0000166,nucleotide bindin…	PF07724.17:AAA domain (Cdc48 subfamily)	--	--	--
LOC123225258	73	35	101	4702	4161	3094	0.5623	0.3325	0.7004	35.6849	32.862	28.6027	0.531733333333333	32.3832	5.92839883576479	6.76081100871766e-49	2.72739567105431e-45	NC_058145.1	11553339	11559691	+	LOC123225258	--	K09518 DnaJ homolog subfamily B member 12 | (RefSeq) chaperone protein dnaJ 49-like (A)	ko04141: Protein processing in endoplasmic reticulum	dnaJ homolog subfamily B member 9-like isoform X2 [Mangifera indica]	DNJA6_ARATH RecName: Full=Chaperone protein dnaJ A6, chloroplastic {ECO:0000305}; Short=atDjA6 {ECO:0000303|PubMed:23894646}; AltName: Full=Chaperone protein dnaJ A26 {ECO:0000303|PubMed:11599562}; Short=AtDjA26 {ECO:0000303|PubMed:11599562}; Flags: Precursor;	A0A2H5NCX7_CITUN RecName: Full=J domain-containing protein {ECO:0000259|PROSITE:PS50076};	Molecular chaperone (DnaJ superfamily)	GO:0009507,chloroplast; GO:0009941,chloroplast envelope; GO:0009535,chloroplast thylakoid membrane; GO:0005737,cytoplasm; GO:0005773,vacuole; GO:0005524,ATP binding; GO:0031072,heat shock protein binding; GO:0005506,iron ion binding; GO:0051082,unfolded protein binding; GO:0051085,chaperone cofactor-dependent protein refolding; GO:0042026,protein refolding; GO:0009408,response to heat; GO:0000166…	PF00226.34:DnaJ domain	--	--	--
LOC123222975	1057	913	1090	26	14	22	74.3847	79.2389	69.0575	1.8027	1.0101	1.8581	74.2270333333333	1.55696666666667	-5.57513	7.17504282727606e-48	2.57289063516311e-44	NC_058144.1	5276040	5276773	+	LOC123222975	--	--	--	putative SERF-like protein [Mangifera indica]	--	A0A8B8PCQ9_9MYRT SubName: Full=putative SERF-like protein {ECO:0000313|RefSeq:XP_030532610.1};	--	--	PF04419.17:4F5 protein related disordered region	--	--	--
LOC123193050	89	78	129	11038	6681	3467	1.7254	1.8649	2.2515	210.834	132.797	80.6659	1.94726666666667	141.432366666667	6.18251804098503	3.82109021614001e-43	1.23318044545487e-39	NC_058148.1	10894706	10902578	+	LOC123193050	--	--	--	uncharacterized protein LOC123193050 [Mangifera indica]	--	A0A2H5Q8G0_CITUN RecName: Full=Transglut_core2 domain-containing protein {ECO:0000259|Pfam:PF13369};	--	--	PF13369.9:Transglutaminase-like superfamily	--	--	--
LOC123209806	47	60	82	7585	4148	2627	0.8582	1.3512	1.348	136.459	77.6569	57.5693	1.1858	90.5616666666667	6.25496790233881	4.2506607074731e-43	1.24710520920254e-39	NC_058138.1	20276072	20281491	+	LOC123209806	--	K25380 zinc metalloprotease EGY, chloroplastic [EC:3.4.24.-] | (RefSeq) probable zinc metalloprotease EGY1, chloroplastic isoform X1 (A)	--	probable zinc metalloprotease EGY1, chloroplastic isoform X1 [Mangifera indica]	EGY1_ARATH RecName: Full=Probable zinc metalloprotease EGY1, chloroplastic; EC=3.4.24.-; AltName: Full=Protein AMMONIUM OVERLY SENSITIVE 1; AltName: Full=Protein ETHYLENE-DEPENDENT GRAVITROPISM-DEFICIENT AND YELLOW-GREEN 1; Short=AtEGY1; Flags: Precursor;	A0A5C7IB22_9ROSI SubName: Full=Uncharacterized protein {ECO:0000313|EMBL:TXG66397.1};	--	GO:0009507,chloroplast; GO:0031969,chloroplast membrane; GO:0016021,integral component of membrane; GO:0004222,metalloendopeptidase activity; GO:0009658,chloroplast organization; GO:0009630,gravitropism; GO:0009959,negative gravitropism; GO:0048564,photosystem I assembly; GO:0010207,photosystem II assembly; GO:0006508,proteolysis; GO:0060359,response to ammonium ion; GO:0043157,response to cation…	PF02163.25:Peptidase family M50	--	--	--
LOC123197846	1327	867	1955	22	29	32	40.8511	32.9163	54.182	0.6673	0.9153	1.1823	42.6498	0.921633333333333	-5.5322	2.45001313611586e-42	6.58910616182227e-39	NC_058151.1	2522669	2523811	+	LOC123197846	--	K09286 EREBP-like factor | (RefSeq) ethylene-responsive transcription factor TINY-like (A)	--	dehydration-responsive element-binding protein 1A-like [Mangifera indica]	DRE1B_ARATH RecName: Full=Dehydration-responsive element-binding protein 1B {ECO:0000303|PubMed:9707537}; Short=Protein DREB1B {ECO:0000303|PubMed:9707537}; AltName: Full=C-repeat/dehydration-responsive element-binding factor 1 {ECO:0000303|PubMed:9023378}; Short=C-repeat-binding factor 1 {ECO:0000303|PubMed:9023378}; Short=CRT/DRE-binding factor 1 {ECO:0000303|PubMed:9023378};	A0A0A1E9U6_MANIN SubName: Full=CRT/DRE-binding factor {ECO:0000313|EMBL:AIY26287.1};	--	GO:0005634,nucleus; GO:0003677,DNA binding; GO:0003700,DNA-binding transcription factor activity; GO:0009631,cold acclimation; GO:0045893,positive regulation of DNA-templated transcription; GO:0009409,response to cold; GO:0003674,molecular_function; GO:0003676,nucleic acid binding; GO:0005488,binding; GO:0097159,organic cyclic compound binding; GO:1901363,heterocyclic compound binding; GO:0140110…	PF00847.23:AP2 domain	AP2/ERF-ERF	TF	AP2/ERF->AP2/ERF-ERF
LOC123213193	9	5	5	1176	1304	752	0.2768	0.1897	0.1385	35.6376	41.122	27.7591	0.201666666666667	34.8395666666667	7.43261022796566	5.34737360854083e-42	1.32750606514183e-38	NC_058140.1	19383718	19385424	+	LOC123213193	--	--	--	uncharacterized protein LOC123213193 [Mangifera indica]	--	A0A067GTI1_CITSI SubName: Full=Uncharacterized protein {ECO:0000313|EMBL:KDO83028.1};	--	GO:0016021,integral component of membrane; GO:0005575,cellular_component; GO:0016020,membrane; GO:0031224,intrinsic component of membrane; GO:0110165,cellular anatomical entity	--	--	--	--
LOC123218521	1	5	6	1252	1648	896	0.0758	0.4676	0.4096	93.5436	128.133	81.5461	0.317666666666667	101.074333333333	8.3136872591528	3.98622263855918e-39	9.18909737244432e-36	NC_058142.1	6708998	6709549	-	LOC123218521	--	--	--	--	--	--	--	--	--	--	--	--
LOC123203432	205	363	195	31640	21885	16736	1.702	3.7169	1.4576	258.823	186.298	166.764	2.29216666666667	203.961933333333	6.47544415977343	6.2427922081085e-38	1.3431575528819e-34	NC_058155.1	5529364	5556974	-	LOC123203432	--	K12124 GIGANTEA | (RefSeq) protein GIGANTEA-like isoform X1 (A)	ko04712: Circadian rhythm - plant	protein GIGANTEA-like isoform X1 [Mangifera indica]	GIGAN_ARATH RecName: Full=Protein GIGANTEA;	A0A5J6D142_MANIN SubName: Full=GIGANTEA protein {ECO:0000313|EMBL:QEQ91203.1};	--	GO:0005737,cytoplasm; GO:0005654,nucleoplasm; GO:0005634,nucleus; GO:0030154,cell differentiation; GO:0007623,circadian rhythm; GO:0009908,flower development; GO:0048578,positive regulation of long-day photoperiodism, flowering; GO:0009585,red, far-red light phototransduction; GO:0042752,regulation of circadian rhythm; GO:0048586,regulation of long-day photoperiodism, flowering; GO:0006355,regula…	--	--	--	--
LOC123202102	25	10	12	4074	3347	1331	0.5742	0.2833	0.2481	92.1913	78.817	36.6887	0.368533333333333	69.2323333333333	7.5535070468114	8.5696764199618e-38	1.72855729438392e-34	NC_058154.1	10564054	10566752	+	LOC123202102	--	K10666 E3 ubiquitin-protein ligase RNF5 [EC:2.3.2.27] | (RefSeq) E3 ubiquitin-protein ligase RMA3-like isoform X1 (A)	ko04141: Protein processing in endoplasmic reticulum	E3 ubiquitin-protein ligase RMA3-like isoform X1 [Mangifera indica]	RMA3_ARATH RecName: Full=E3 ubiquitin-protein ligase RMA3; EC=2.3.2.27; AltName: Full=Protein RING membrane-anchor 3; AltName: Full=RING-type E3 ubiquitin transferase RMA3 {ECO:0000305};	V4WEZ9_CITCL RecName: Full=RING-type E3 ubiquitin transferase {ECO:0000256|ARBA:ARBA00012483}; EC=2.3.2.27 {ECO:0000256|ARBA:ARBA00012483};	Predicted E3 ubiquitin ligase	GO:0005783,endoplasmic reticulum; GO:0005789,endoplasmic reticulum membrane; GO:0016021,integral component of membrane; GO:0046872,metal ion binding; GO:0061630,ubiquitin protein ligase activity; GO:0044390,ubiquitin-like protein conjugating enzyme binding; GO:0004842,ubiquitin-protein transferase activity; GO:0071456,cellular response to hypoxia; GO:0071712,ER-associated misfolded protein catabo…	PF14634.9:zinc-RING finger domain	--	--	--
LOC123196673	13	27	38	10082	8317	2149	0.3503	0.8971	0.9217	267.628	229.745	69.4874	0.723033333333333	188.953433333333	8.02975285770724	2.04305620806637e-37	3.87856194134859e-34	NC_058150.1	8755137	8758412	-	LOC123196673	--	K13993 HSP20 family protein | (RefSeq) 17.4 kDa class III heat shock protein (A)	ko04141: Protein processing in endoplasmic reticulum	uncharacterized protein LOC123196673 [Mangifera indica]	HSP21_HELAN RecName: Full=17.9 kDa class II heat shock protein;	V4UG49_CITCL RecName: Full=SHSP domain-containing protein {ECO:0000259|PROSITE:PS01031};	Molecular chaperone (small heat-shock protein Hsp26/Hsp42)	GO:0005737,cytoplasm; GO:0005575,cellular_component; GO:0005622,intracellular anatomical structure; GO:0110165,cellular anatomical entity	PF00011.24:Hsp20/alpha crystallin family	--	--	--
LOC123224919	857	785	821	11	17	20	33.4684	37.8079	28.8651	0.4232	0.6807	0.9374	33.3804666666667	0.680433333333333	-5.61641	1.57118784627544e-36	2.81705252015818e-33	NC_058145.1	13632639	13635201	-	LOC123224919	--	K13113 ubiquitin-like protein 5 | (RefSeq) ubiquitin-like protein 5 (A)	--	ubiquitin-like protein 5 [Mangifera indica]	UBL5_ARATH RecName: Full=Ubiquitin-like protein 5;	A0A6A3B706_HIBSY SubName: Full=Ubiquitin-like protein 5 {ECO:0000313|EMBL:KAE8712171.1};	Ubiquitin-like protein	GO:0005737,cytoplasm; GO:0005829,cytosol; GO:0005634,nucleus; GO:0031386,protein tag; GO:0000398,mRNA splicing, via spliceosome; GO:0036211,protein modification process; GO:0008380,RNA splicing; GO:0003674,molecular_function; GO:0000375,RNA splicing, via transesterification reactions; GO:0000377,RNA splicing, via transesterification reactions with bulged adenosine as nucleophile; GO:0006139,nucle…	PF00240.26:Ubiquitin family	--	--	--
LOC123222366	4683	3178	4830	410	387	276	91.748	76.7865	85.1913	7.9142	7.7737	6.4896	84.5752666666667	7.3925	-3.5161	2.71934451875586e-36	4.61902135020042e-33	NC_058144.1	5016168	5018719	-	LOC123222366	--	K08332 vacuolar protein 8 | (RefSeq) U-box domain-containing protein 4-like (A)	--	U-box domain-containing protein 9-like [Mangifera indica]	PUB9_ARATH RecName: Full=U-box domain-containing protein 9; EC=2.3.2.27; AltName: Full=Plant U-box protein 9; AltName: Full=RING-type E3 ubiquitin transferase PUB9 {ECO:0000305};	V4VDJ2_CITCL RecName: Full=RING-type E3 ubiquitin transferase {ECO:0000256|ARBA:ARBA00012483}; EC=2.3.2.27 {ECO:0000256|ARBA:ARBA00012483};	FOG: Armadillo/beta-catenin-like repeats	GO:0005737,cytoplasm; GO:0005634,nucleus; GO:0005886,plasma membrane; GO:0070696,transmembrane receptor protein serine/threonine kinase binding; GO:0004842,ubiquitin-protein transferase activity; GO:0009738,abscisic acid-activated signaling pathway; GO:0071215,cellular response to abscisic acid stimulus; GO:0048527,lateral root development; GO:0016567,protein ubiquitination; GO:0003674,molecular_…	PF04564.18:U-box domain	--	--	--
LOC123215535	4760	3012	5366	93	95	153	121.722	94.9892	123.534	2.3431	2.4907	4.6955	113.415	3.17643333333333	-5.15806	3.82153339617926e-36	6.16661736474467e-33	NC_058141.1	9527444	9528819	-	LOC123215535	--	--	--	F-box/kelch-repeat protein At1g23390 [Mangifera indica]	FBK9_ARATH RecName: Full=F-box/kelch-repeat protein At1g23390;	A0A5B7BR17_DAVIN RecName: Full=F-box domain-containing protein {ECO:0000259|Pfam:PF00646};	--	GO:0005737,cytoplasm; GO:0005829,cytosol; GO:0005634,nucleus; GO:0043161,proteasome-mediated ubiquitin-dependent protein catabolic process; GO:0006508,proteolysis; GO:0006511,ubiquitin-dependent protein catabolic process; GO:0006807,nitrogen compound metabolic process; GO:0008150,biological_process; GO:0008152,metabolic process; GO:0009056,catabolic process; GO:0009057,macromolecule catabolic pro…	PF13964.9:Kelch motif	--	--	--
LOC123216893	45	67	56	2816	2081	1512	0.3828	0.703	0.4289	23.6037	18.1516	15.4378	0.5049	19.0643666666667	5.23873711677593	2.52152179036631e-35	3.87509870192819e-32	NC_058141.1	11856490	11867697	+	LOC123216893	--	K10908 DNA-directed RNA polymerase, mitochondrial [EC:2.7.7.6] | (RefSeq) DNA-directed RNA polymerase 1B, mitochondrial-like isoform X1 (A)	--	DNA-directed RNA polymerase 1B, mitochondrial-like isoform X1 [Mangifera indica]	RPO1B_TOBAC RecName: Full=DNA-directed RNA polymerase 1B, mitochondrial; EC=2.7.7.6; AltName: Full=NictaRpoT1-tom; AltName: Full=T7 bacteriophage-type single subunit RNA polymerase 1B; Flags: Precursor;	A0A067FVT5_CITSI RecName: Full=DNA-directed RNA polymerase {ECO:0000256|ARBA:ARBA00012418, ECO:0000256|RuleBase:RU003805}; EC=2.7.7.6 {ECO:0000256|ARBA:ARBA00012418, ECO:0000256|RuleBase:RU003805};	Mitochondrial/chloroplast DNA-directed RNA polymerase RPO41, provides primers for DNA replication-initiation	GO:0034245,mitochondrial DNA-directed RNA polymerase complex; GO:0003677,DNA binding; GO:0003899,DNA-directed 5'-3' RNA polymerase activity; GO:0006390,mitochondrial transcription; GO:0003674,molecular_function; GO:0003676,nucleic acid binding; GO:0005488,binding; GO:0097159,organic cyclic compound binding; GO:1901363,heterocyclic compound binding; GO:0003824,catalytic activity; GO:0016740,transf…	PF00940.22:DNA-dependent RNA polymerase	--	--	--
LOC123224619	910	833	923	37306	34265	16109	25.2125	28.4629	23.0225	1018.36	973.352	535.646	25.5659666666667	842.454	5.04230074740039	5.96353222764621e-35	8.74823070831028e-32	NC_058137.1	3004964	3007065	-	LOC123224619	--	K13126 polyadenylate-binding protein | (RefSeq) 30S ribosomal protein 2, chloroplastic (A)	ko03015: mRNA surveillance pathway; ko03018: RNA degradation	RNA-binding protein CP29B, chloroplastic [Mangifera indica]	CP29B_ARATH RecName: Full=RNA-binding protein CP29B, chloroplastic {ECO:0000305}; AltName: Full=Ribonucleoprotein At2g37220; Flags: Precursor;	V4SXT8_CITCL SubName: Full=Uncharacterized protein {ECO:0000313|EMBL:ESR42011.1};	FOG: RRM domain	GO:0009507,chloroplast; GO:0009941,chloroplast envelope; GO:0009570,chloroplast stroma; GO:0009534,chloroplast thylakoid; GO:0009535,chloroplast thylakoid membrane; GO:0005783,endoplasmic reticulum; GO:0010319,stromule; GO:0009579,thylakoid; GO:0003729,mRNA binding; GO:0008266,poly(U) RNA binding; GO:1901259,chloroplast rRNA processing; GO:0045087,innate immune response; GO:0006397,mRNA processin…	PF00076.25:RNA recognition motif. (a.k.a. RRM, RBD, or RNP domain)	--	--	--
LOC123228298	4894	3108	4529	354	350	270	78.1678	61.2215	65.1242	5.5708	5.7316	5.1756	68.1711666666667	5.49266666666667	-3.63358	1.04240362774838e-34	1.46267357731841e-31	NC_058146.1	5485827	5489865	+	LOC123228298	--	K26562 MFS transporter, POT/PTR family, peptide/nitrate/nicotianamine transporter | (RefSeq) protein NRT1/ PTR FAMILY 5.1 (A)	--	protein NRT1/ PTR FAMILY 5.1 [Mangifera indica]	PTR30_ARATH RecName: Full=Protein NRT1/ PTR FAMILY 5.1; Short=AtNPF5.1;	A0A5C7GZ36_9ROSI SubName: Full=Uncharacterized protein {ECO:0000313|EMBL:TXG50010.1};	H+/oligopeptide symporter	GO:0016021,integral component of membrane; GO:0071916,dipeptide transmembrane transporter activity; GO:0042937,tripeptide transmembrane transporter activity; GO:0009624,response to nematode; GO:0003674,molecular_function; GO:0005215,transporter activity; GO:0022857,transmembrane transporter activity; GO:0035673,oligopeptide transmembrane transporter activity; GO:0042887,amide transmembrane transp…	PF00854.24:POT family	--	--	--
LOC123207321	89	108	100	13623	9754	3411	0.8684	1.2997	0.8785	130.971	97.5843	39.9456	1.01553333333333	89.5002666666667	6.46158248111421	4.95270381067502e-34	6.65994208674646e-31	NW_025401163.1	100043	108159	+	LOC123207321	--	K13418 somatic embryogenesis receptor kinase 1 [EC:2.7.10.1 2.7.11.1] | (RefSeq) somatic embryogenesis receptor kinase 2 (A)	--	probable LRR receptor-like serine/threonine-protein kinase At1g53430 [Mangifera indica]	Y5343_ARATH RecName: Full=Probable LRR receptor-like serine/threonine-protein kinase At1g53430; EC=2.7.11.1; Flags: Precursor;	A0A067DHQ0_CITSI RecName: Full=Protein kinase domain-containing protein {ECO:0000259|PROSITE:PS50011};	--	GO:0016021,integral component of membrane; GO:0005886,plasma membrane; GO:0005524,ATP binding; GO:0106310,protein serine kinase activity; GO:0004674,protein serine/threonine kinase activity; GO:0006468,protein phosphorylation; GO:0000166,nucleotide binding; GO:0003674,molecular_function; GO:0005488,binding; GO:0017076,purine nucleotide binding; GO:0030554,adenyl nucleotide binding; GO:0032553,rib…	PF07714.20:Protein tyrosine and serine/threonine kinase	--	--	--
LOC123225197	6469	3683	9062	146	206	229	226.49	159.028	285.636	5.0363	7.3948	9.6224	223.717933333333	7.35116666666667	-4.92756	5.21098358392124e-33	6.63358338455076e-30	NC_058145.1	2128595	2129599	+	LOC123225197	--	K09286 EREBP-like factor | (RefSeq) ethylene-responsive transcription factor TINY-like (A)	--	dehydration-responsive element-binding protein 1D-like [Mangifera indica]	DRE1D_ARATH RecName: Full=Dehydration-responsive element-binding protein 1D; Short=Protein DREB1D; AltName: Full=C-repeat/dehydration-responsive element-binding factor 4; Short=C-repeat-binding factor 4; Short=CRT/DRE-binding factor 4;	A0A0A1E9U6_MANIN SubName: Full=CRT/DRE-binding factor {ECO:0000313|EMBL:AIY26287.1};	--	GO:0005634,nucleus; GO:0003700,DNA-binding transcription factor activity; GO:0000976,transcription cis-regulatory region binding; GO:0009738,abscisic acid-activated signaling pathway; GO:0019760,glucosinolate metabolic process; GO:0003674,molecular_function; GO:0140110,transcription regulator activity; GO:0001067,transcription regulatory region nucleic acid binding; GO:0003676,nucleic acid bindin…	PF00847.23:AP2 domain	AP2/ERF-ERF	TF	AP2/ERF->AP2/ERF-ERF
LOC123209359	9	15	13	710	597	461	0.1144	0.2352	0.1488	8.8924	7.7809	7.0331	0.166133333333333	7.90213333333333	5.57182871647739	5.34419384619712e-33	6.63358338455076e-30	NC_058138.1	16412964	16423318	+	LOC123209359	--	K14491 two-component response regulator ARR-B family | (RefSeq) two-component response regulator ARR2-like isoform X1 (A)	ko04075: Plant hormone signal transduction	transcription factor BOA-like [Mangifera indica]	PCLL_ARATH RecName: Full=Transcription factor BOA; AltName: Full=Protein BROTHER OF LUX ARRHYTHMO; AltName: Full=Protein PHYTOCLOCK 1-like; Short=Protein PCL1-like;	V4SH30_CITCL RecName: Full=HTH myb-type domain-containing protein {ECO:0000259|PROSITE:PS51294};	--	GO:0005634,nucleus; GO:0003677,DNA binding; GO:0003700,DNA-binding transcription factor activity; GO:0007623,circadian rhythm; GO:0009909,regulation of flower development; GO:0006355,regulation of DNA-templated transcription; GO:0003674,molecular_function; GO:0003676,nucleic acid binding; GO:0005488,binding; GO:0097159,organic cyclic compound binding; GO:1901363,heterocyclic compound binding; GO:…	PF00249.34:Myb-like DNA-binding domain	GARP-G2-like	TF	GARP->GARP-G2-like
LOC123210456	895	782	1031	45	24	44	10.7482	11.5818	11.1467	0.5324	0.2955	0.6342	11.1589	0.487366666666667	-4.51704	5.63077563125638e-33	6.73044525731619e-30	NC_058139.1	2034300	2042380	-	LOC123210456	--	--	--	uncharacterized protein LOC123210456 isoform X3 [Mangifera indica]	--	A0A2H5NFQ3_CITUN SubName: Full=Uncharacterized protein {ECO:0000313|EMBL:GAY39009.1};	--	GO:0016021,integral component of membrane; GO:0005575,cellular_component; GO:0016020,membrane; GO:0031224,intrinsic component of membrane; GO:0110165,cellular anatomical entity	PF04982.16:HPP family	--	--	--
LOC123217085	50	68	56	2582	2081	1323	0.4455	0.7472	0.4492	22.6671	19.0111	14.1477	0.5473	18.6086333333333	5.08749643722265	1.03424795860655e-32	1.19208158457532e-29	NC_058141.1	11879407	11889969	-	LOC123217085	--	K10908 DNA-directed RNA polymerase, mitochondrial [EC:2.7.7.6] | (RefSeq) DNA-directed RNA polymerase 1B, mitochondrial-like isoform X1 (A)	--	DNA-directed RNA polymerase 1B, mitochondrial-like isoform X1 [Mangifera indica]	RPOT2_NICSY RecName: Full=DNA-directed RNA polymerase 2, chloroplastic/mitochondrial; EC=2.7.7.6; AltName: Full=NsRpoT-B; AltName: Full=T7 bacteriophage-type single subunit RNA polymerase 2; Flags: Precursor;	V4TCR1_CITCL RecName: Full=DNA-directed RNA polymerase {ECO:0000256|ARBA:ARBA00012418, ECO:0000256|RuleBase:RU003805}; EC=2.7.7.6 {ECO:0000256|ARBA:ARBA00012418, ECO:0000256|RuleBase:RU003805};	Mitochondrial/chloroplast DNA-directed RNA polymerase RPO41, provides primers for DNA replication-initiation	GO:0009507,chloroplast; GO:0000428,DNA-directed RNA polymerase complex; GO:0005739,mitochondrion; GO:0009536,plastid; GO:0003677,DNA binding; GO:0003899,DNA-directed 5'-3' RNA polymerase activity; GO:0006351,DNA-templated transcription; GO:0003674,molecular_function; GO:0003676,nucleic acid binding; GO:0005488,binding; GO:0097159,organic cyclic compound binding; GO:1901363,heterocyclic compound b…	PF00940.22:DNA-dependent RNA polymerase	--	--	--
LOC123212230	3182	5645	10617	149	122	167	46.7882	102.367	140.544	2.1586	1.8392	2.947	96.5664333333333	2.31493333333333	-5.38248	1.53857169234546e-32	1.71221807679535e-29	NC_058139.1	6129349	6131741	+	LOC123212230	--	K03283 heat shock 70kDa protein 1/6/8 | (RefSeq) heat shock cognate 70 kDa protein-like (A)	ko03040: Spliceosome; ko04141: Protein processing in endoplasmic reticulum; ko04144: Endocytosis	heat shock cognate 70 kDa protein-like [Mangifera indica]	HSP7C_PETHY RecName: Full=Heat shock cognate 70 kDa protein;	V4SUS3_CITCL SubName: Full=Uncharacterized protein {ECO:0000313|EMBL:ESR40906.1};	Molecular chaperones HSP70/HSC70, HSP70 superfamily	GO:0005524,ATP binding; GO:0140662,ATP-dependent protein folding chaperone; GO:0000166,nucleotide binding; GO:0003674,molecular_function; GO:0005488,binding; GO:0017076,purine nucleotide binding; GO:0030554,adenyl nucleotide binding; GO:0032553,ribonucleotide binding; GO:0032555,purine ribonucleotide binding; GO:0032559,adenyl ribonucleotide binding; GO:0035639,purine ribonucleoside triphosphate …	PF00012.23:Hsp70 protein	--	--	--
LOC123200370	402	378	791	20	21	13	12.6748	14.6982	22.4526	0.6213	0.6789	0.4919	16.6085333333333	0.597366666666667	-4.79716	2.6483670408863e-32	2.84902498368412e-29	NC_058153.1	4105113	4106397	+	LOC123200370	--	K09422 transcription factor MYB, plant | (RefSeq) transcription factor MYB1-like (A)	--	transcription factor MYB1-like [Mangifera indica]	MYB2_CROXC RecName: Full=Transcription factor MYB1 {ECO:0000305}; AltName: Full=Myb-related protein 1 {ECO:0000303|PubMed:31004005}; Short=CcMYB2 {ECO:0000303|PubMed:31004005};	A0A7G1GM88_MANIN SubName: Full=MYB transcription factor {ECO:0000313|EMBL:BCB17002.1};	Transcription factor, Myb superfamily	GO:0005634,nucleus; GO:0003677,DNA binding; GO:0009813,flavonoid biosynthetic process; GO:0003674,molecular_function; GO:0003676,nucleic acid binding; GO:0005488,binding; GO:0097159,organic cyclic compound binding; GO:1901363,heterocyclic compound binding; GO:0008150,biological_process; GO:0008152,metabolic process; GO:0009058,biosynthetic process; GO:0009812,flavonoid metabolic process; GO:00717…	PF00249.34:Myb-like DNA-binding domain	MYB	TF	MYB->MYB
LOC123224879	6712	12652	8203	318	252	275	196.975	457.907	216.724	9.1947	7.5824	9.6856	290.535566666667	8.8209	-5.04165	5.7023670025805e-32	5.93653194433163e-29	NC_058145.1	7911273	7915108	-	LOC123224879	--	--	--	haloacid dehalogenase-like hydrolase domain-containing protein 3 [Mangifera indica]	--	A0A061EW09_THECC SubName: Full=Haloacid dehalogenase-like hydrolase superfamily protein isoform 2 {ECO:0000313|EMBL:EOY08996.1};	Predicted hydrolase (HAD superfamily)	GO:0016787,hydrolase activity; GO:0003674,molecular_function; GO:0003824,catalytic activity	PF13419.9:Haloacid dehalogenase-like hydrolase	--	--	--
LOC123230155	21	34	20	9975	5493	1657	0.5636	1.1254	0.4833	263.778	151.157	53.3744	0.7241	156.103166666667	7.75209513757757	2.12906060094023e-31	2.147224149192e-28	NC_058147.1	2930849	2933513	-	LOC123230155	--	--	--	cold-regulated protein 27-like isoform X1 [Mangifera indica]	COR27_ARATH RecName: Full=Cold-regulated protein 27 {ECO:0000303|PubMed:19566593};	A0A5C7H727_9ROSI SubName: Full=Uncharacterized protein {ECO:0000313|EMBL:TXG52415.1};	--	GO:0005634,nucleus; GO:0045892,negative regulation of DNA-templated transcription; GO:0042752,regulation of circadian rhythm; GO:2000028,regulation of photoperiodism, flowering; GO:0009737,response to abscisic acid; GO:0009646,response to absence of light; GO:0009637,response to blue light; GO:0009409,response to cold; GO:0010114,response to red light; GO:0009615,response to virus; GO:0048511,rhy…	--	--	--	--
LOC123229990	1623	1655	1171	69513	58628	35629	12.5872	15.8295	8.176	531.159	466.186	331.625	12.1975666666667	442.990266666667	5.18260972684173	2.19615241130724e-31	2.14777050818541e-28	NC_058147.1	7793452	7811818	+	LOC123229990	--	K12124 GIGANTEA | (RefSeq) protein GIGANTEA-like isoform X1 (A)	ko04712: Circadian rhythm - plant	protein GIGANTEA-like isoform X1 [Mangifera indica]	GIGAN_ARATH RecName: Full=Protein GIGANTEA;	A0A5J6D142_MANIN SubName: Full=GIGANTEA protein {ECO:0000313|EMBL:QEQ91203.1};	--	GO:0005737,cytoplasm; GO:0005654,nucleoplasm; GO:0005634,nucleus; GO:0030154,cell differentiation; GO:0007623,circadian rhythm; GO:0009908,flower development; GO:0048578,positive regulation of long-day photoperiodism, flowering; GO:0009585,red, far-red light phototransduction; GO:0042752,regulation of circadian rhythm; GO:0048586,regulation of long-day photoperiodism, flowering; GO:0006355,regula…	--	--	--	--
LOC123192469	4	4	2	2000	1380	497	0.0849	0.1047	0.0382	41.8189	30.0274	12.6586	0.0759333333333333	28.1683	8.53512344093705	5.07696295034751e-31	4.8190830969578e-28	NC_058148.1	8594960	8597578	-	LOC123192469	--	K03834 tyrosine-specific transport protein | (RefSeq) tyrosine-specific transport protein 2-like isoform X1 (A)	--	tyrosine-specific transport protein 2-like isoform X1 [Mangifera indica]	--	V4VB69_CITCL SubName: Full=Uncharacterized protein {ECO:0000313|EMBL:ESR49534.1};	--	GO:0016021,integral component of membrane; GO:0005886,plasma membrane; GO:0003333,amino acid transmembrane transport; GO:0006810,transport; GO:0006865,amino acid transport; GO:0008150,biological_process; GO:0009987,cellular process; GO:0015849,organic acid transport; GO:0051179,localization; GO:0051234,establishment of localization; GO:0055085,transmembrane transport; GO:0071702,organic substance…	PF03222.16:Tryptophan/tyrosine permease family	--	--	--
LOC123193186	3849	2974	3772	338	320	332	38.7064	36.8837	34.1493	3.3489	3.2994	4.0069	36.5798	3.55173333333333	-3.36445	1.24068192972094e-30	1.14401508336811e-27	NC_058148.1	6174851	6182472	-	LOC123193186	--	K05349 beta-glucosidase [EC:3.2.1.21] | (RefSeq) beta-glucosidase BoGH3B-like isoform X1 (A)	ko00460: Cyanoamino acid metabolism; ko00500: Starch and sucrose metabolism; ko00999: Biosynthesis of various plant secondary metabolites; ko01100: Metabolic pathways; ko01110: Biosynthesis of secondary metabolites	beta-glucosidase BoGH3B-like isoform X1 [Mangifera indica]	XYL2_MEDSV RecName: Full=Beta-xylosidase/alpha-L-arabinofuranosidase 2 {ECO:0000303|PubMed:17615411, ECO:0000312|EMBL:ABQ45228.1}; AltName: Full=Xylan 1,4-beta-xylosidase/Alpha-L-arabinofuranosidase 2; Short=MsXyl2 {ECO:0000303|PubMed:17615411}; Includes: RecName: Full=Beta-xylosidase; EC=3.2.1.37; AltName: Full=1,4-beta-D-xylan xylohydrolase {ECO:0000250|UniProtKB:P48792}; AltName: Full=Xylan 1,…	V4U9K5_CITCL SubName: Full=Uncharacterized protein {ECO:0000313|EMBL:ESR58911.1};	--	GO:0005576,extracellular region; GO:0046556,alpha-L-arabinofuranosidase activity; GO:0009044,xylan 1,4-beta-xylosidase activity; GO:0045493,xylan catabolic process; GO:0003674,molecular_function; GO:0003824,catalytic activity; GO:0004553,hydrolase activity, hydrolyzing O-glycosyl compounds; GO:0016787,hydrolase activity; GO:0016798,hydrolase activity, acting on glycosyl bonds; GO:0097599,xylanase…	PF00933.24:Glycosyl hydrolase family 3 N terminal domain	--	--	--
LOC123230338	73	51	97	2479	2043	1074	1.32	1.1373	1.579	44.1633	37.8746	23.3064	1.34543333333333	35.1147666666667	4.70593503682515	3.37102653374443e-30	3.02203164787594e-27	NC_058148.1	10350516	10352893	+	LOC123230338	--	K09286 EREBP-like factor | (RefSeq) dehydration-responsive element-binding protein 2A-like isoform X1 (A)	--	dehydration-responsive element-binding protein 2A-like isoform X1 [Mangifera indica]	DRE2A_ARATH RecName: Full=Dehydration-responsive element-binding protein 2A {ECO:0000303|PubMed:10809011, ECO:0000303|PubMed:9707537}; Short=Protein DREB2A {ECO:0000303|PubMed:10809011, ECO:0000303|PubMed:9707537};	A0A067FRR3_CITSI RecName: Full=AP2/ERF domain-containing protein {ECO:0000259|PROSITE:PS51032};	--	GO:0005634,nucleus; GO:0003700,DNA-binding transcription factor activity; GO:0000976,transcription cis-regulatory region binding; GO:0071456,cellular response to hypoxia; GO:0010286,heat acclimation; GO:0045893,positive regulation of DNA-templated transcription; GO:0009408,response to heat; GO:0042542,response to hydrogen peroxide; GO:0010224,response to UV-B; GO:0009414,response to water depriva…	PF00847.23:AP2 domain	AP2/ERF-ERF	TF	AP2/ERF->AP2/ERF-ERF
LOC123219544	834	432	1436	10	7	17	26.1782	16.7231	40.5792	0.3093	0.2253	0.6404	27.8268333333333	0.391666666666667	-6.15071	6.77292053827476e-30	5.90763417653355e-27	NC_058142.1	7991582	7992995	+	LOC123219544	--	K13248 pyridoxal phosphate phosphatase PHOSPHO2 [EC:3.1.3.74] | (RefSeq) inorganic pyrophosphatase 2-like (A)	ko00750: Vitamin B6 metabolism; ko01100: Metabolic pathways; ko01240: Biosynthesis of cofactors	inorganic pyrophosphatase 2-like [Mangifera indica]	PPSP2_ARATH RecName: Full=Inorganic pyrophosphatase 2; Short=AtPPsPase2; Short=PPi phosphatase 2; Short=Pyrophosphate-specific phosphatase 2; EC=3.6.1.1;	A0A067EXL8_CITSI SubName: Full=Uncharacterized protein {ECO:0000313|EMBL:KDO58635.1};	Predicted haloacid dehalogenase-like hydrolase	GO:0004427,inorganic diphosphate phosphatase activity; GO:0046872,metal ion binding; GO:0016791,phosphatase activity; GO:0052731,phosphocholine phosphatase activity; GO:0052732,phosphoethanolamine phosphatase activity; GO:0051262,protein tetramerization; GO:0003674,molecular_function; GO:0003824,catalytic activity; GO:0016462,pyrophosphatase activity; GO:0016787,hydrolase activity; GO:0016817,hyd…	PF06888.15:Putative Phosphatase	--	--	--
LOC123202733	0	2	1	3273	2107	1233	0	0.0888	0.0324	116.139	77.8024	53.2944	0.0404	82.4120333333333	10.9942839985453	7.83821199527966e-30	6.65691094009633e-27	NC_058155.1	11191405	11192921	+	LOC123202733	--	--	--	cold-regulated protein 27-like [Mangifera indica]	COR27_ARATH RecName: Full=Cold-regulated protein 27 {ECO:0000303|PubMed:19566593};	A0A5C7H727_9ROSI SubName: Full=Uncharacterized protein {ECO:0000313|EMBL:TXG52415.1};	--	GO:0005634,nucleus; GO:0045892,negative regulation of DNA-templated transcription; GO:0042752,regulation of circadian rhythm; GO:2000028,regulation of photoperiodism, flowering; GO:0009737,response to abscisic acid; GO:0009646,response to absence of light; GO:0009637,response to blue light; GO:0009409,response to cold; GO:0010114,response to red light; GO:0009615,response to virus; GO:0048511,rhy…	--	--	--	--
LOC123193704	22	24	20	679	679	713	1.1451	1.5406	0.9372	34.8218	36.2365	44.5406	1.20763333333333	38.5329666666667	4.99583887469316	9.91616295436989e-29	8.20575197503537e-26	NC_058148.1	9955217	9956017	+	LOC123193704	--	--	--	protein EARLY FLOWERING 4 [Mangifera indica]	ELF4_ARATH RecName: Full=Protein EARLY FLOWERING 4; AltName: Full=Protein ARRHYTHMIC 44;	A0A6P6AI52_DURZI SubName: Full=protein EARLY FLOWERING 4-like {ECO:0000313|RefSeq:XP_022764478.1};	--	GO:0005634,nucleus; GO:0005667,transcription regulator complex; GO:0042803,protein homodimerization activity; GO:0009649,entrainment of circadian clock; GO:0009908,flower development; GO:0000122,negative regulation of transcription by RNA polymerase II; GO:0009648,photoperiodism; GO:0048573,photoperiodism, flowering; GO:0042753,positive regulation of circadian rhythm; GO:0010017,red or far-red li…	PF07011.14:Early Flowering 4 domain	--	--	--
LOC123205616	6	12	5	1203	937	474	0.1085	0.2676	0.0814	21.4314	17.3708	10.286	0.1525	16.3627333333333	6.74546071231434	1.56538251355195e-28	1.26298974649655e-25	NW_025401102.1	298405	303415	+	LOC123205616	--	K24444 [histone H3]-dimethyl/trimethyl-L-lysine36 demethylase [EC:1.14.11.27 1.14.11.-] | (RefSeq) lysine-specific demethylase JMJ30-like isoform X1 (A)	--	lysine-specific demethylase JMJ30-like isoform X1 [Mangifera indica]	JMJ30_ARATH RecName: Full=Lysine-specific demethylase JMJ30 {ECO:0000303|PubMed:18713399}; Short=AtJMJ30 {ECO:0000303|PubMed:18713399}; EC=1.14.11.27 {ECO:0000269|PubMed:25132385}; EC=1.14.11.68 {ECO:0000269|PubMed:25267112}; EC=1.14.11.69 {ECO:0000269|PubMed:25132385}; AltName: Full=JmjC domain-containing protein 30 {ECO:0000303|PubMed:18713399}; AltName: Full=Jumonji domain-containing protein 5…	A0A067FBV2_CITSI RecName: Full=JmjC domain-containing protein {ECO:0000259|PROSITE:PS51184};	Uncharacterized conserved protein, contains JmjC domain	GO:0005737,cytoplasm; GO:0005783,endoplasmic reticulum; GO:0000791,euchromatin; GO:0005634,nucleus; GO:0016706,2-oxoglutarate-dependent dioxygenase activity; GO:0003700,DNA-binding transcription factor activity; GO:0061628,H3K27me3 modified histone binding; GO:0071558,histone H3-tri/di-methyl-lysine-27 demethylase activity; GO:0140681,histone H3-tri/dimethyl-lysine-36 demethylase activity; GO:014…	PF13621.9:Cupin-like domain	Jumonji	TR	Jumonji
LOC123210266	1332	1633	1454	121	65	55	30.6732	46.3768	30.1436	2.7453	1.5347	1.52	35.7312	1.93333333333333	-4.20802	1.84391479997301e-28	1.451430788769e-25	NC_058137.1	17219772	17222719	-	LOC123210266	--	K14498 serine/threonine-protein kinase SRK2 [EC:2.7.11.1] | (RefSeq) serine/threonine-protein kinase SAPK2-like (A)	ko04016: MAPK signaling pathway - plant; ko04075: Plant hormone signal transduction	serine/threonine-protein kinase SAPK2-like [Mangifera indica]	SAPK2_ORYSI RecName: Full=Serine/threonine-protein kinase SAPK2; EC=2.7.11.1; AltName: Full=Osmotic stress/abscisic acid-activated protein kinase 2;	A0A6P6GFS2_ZIZJJ SubName: Full=serine/threonine-protein kinase SAPK2 {ECO:0000313|RefSeq:XP_024932555.1};	Serine/threonine protein kinase	GO:0005737,cytoplasm; GO:0005634,nucleus; GO:0005524,ATP binding; GO:0106310,protein serine kinase activity; GO:0004674,protein serine/threonine kinase activity; GO:0009738,abscisic acid-activated signaling pathway; GO:0006468,protein phosphorylation; GO:0009845,seed germination; GO:0000166,nucleotide binding; GO:0003674,molecular_function; GO:0005488,binding; GO:0017076,purine nucleotide binding…	PF00069.28:Protein kinase domain	--	--	--
LOC123202775	2580	3289	4420	276	318	273	124.872	196.321	192.594	13.1614	15.7803	15.8577	171.262	14.9331333333333	-3.51962	4.02556710433852e-28	3.06047662076024e-25	NC_058155.1	2450014	2450740	+	LOC123202775	--	K13993 HSP20 family protein | (RefSeq) LOW QUALITY PROTEIN: 18.2 kDa class I heat shock protein-like (A)	ko04141: Protein processing in endoplasmic reticulum	18.5 kDa class I heat shock protein-like [Mangifera indica]	HSP16_SOYBN RecName: Full=18.5 kDa class I heat shock protein; AltName: Full=HSP 18.5;	A0A5C7H5P4_9ROSI RecName: Full=SHSP domain-containing protein {ECO:0000259|PROSITE:PS01031};	Molecular chaperone (small heat-shock protein Hsp26/Hsp42)	GO:0005737,cytoplasm; GO:0043621,protein self-association; GO:0051082,unfolded protein binding; GO:0051259,protein complex oligomerization; GO:0006457,protein folding; GO:0009408,response to heat; GO:0042542,response to hydrogen peroxide; GO:0009651,response to salt stress; GO:0003674,molecular_function; GO:0005488,binding; GO:0005515,protein binding; GO:0008150,biological_process; GO:0009987,cel…	PF00011.24:Hsp20/alpha crystallin family	--	--	--
LOC123211534	10203	9297	9694	1243	877	636	247.593	278.235	211.782	29.7188	21.82	18.5226	245.870233333333	23.3538	-3.39617	4.07772734771141e-28	3.06047662076024e-25	NC_058139.1	21176244	21178609	+	LOC123211534	--	K12502 MPBQ/MSBQ methyltransferase [EC:2.1.1.295] | (RefSeq) 2-methyl-6-phytyl-1,4-hydroquinone methyltransferase, chloroplastic-like isoform X1 (A)	ko00130: Ubiquinone and other terpenoid-quinone biosynthesis; ko01100: Metabolic pathways; ko01110: Biosynthesis of secondary metabolites; ko01240: Biosynthesis of cofactors	2-methyl-6-phytyl-1,4-hydroquinone methyltransferase, chloroplastic-like isoform X1 [Mangifera indica]	IN37_SPIOL RecName: Full=2-methyl-6-phytyl-1,4-hydroquinone methyltransferase, chloroplastic; EC=2.1.1.295; AltName: Full=37 kDa inner envelope membrane protein; Short=E37; AltName: Full=MPBQ/MSBQ methyltransferase; Flags: Precursor;	V4RH68_CITCL RecName: Full=SAM_MPBQ_MSBQ_MT domain-containing protein {ECO:0000259|PROSITE:PS51734};	Ubiquinone biosynthesis methyltransferase COQ5	GO:0009706,chloroplast inner membrane; GO:0016021,integral component of membrane; GO:0102550,2-methyl-6-geranylgeranyl-1,4-benzoquinol methyltransferase activity; GO:0051741,2-methyl-6-phytyl-1,4-benzoquinone methyltransferase activity; GO:0051742,2-methyl-6-solanyl-1,4-benzoquinone methyltransferase activity; GO:0032259,methylation; GO:0010189,vitamin E biosynthetic process; GO:0003674,molecular…	PF08241.15:Methyltransferase domain	--	--	--
LOC123201637	1	2	3	836	650	369	0.0269	0.0664	0.0727	22.1578	17.9279	11.9133	0.0553333333333333	17.333	8.29115682705408	1.45326275681519e-27	1.06593520342492e-24	NC_058154.1	2129605	2133060	+	LOC123201637	--	--	--	uncharacterized protein LOC123201637 [Mangifera indica]	--	A0A4V5ZX92_POPAL SubName: Full=Uncharacterized protein {ECO:0000313|EMBL:TKR58895.1};	--	--	--	--	--	--
LOC123225975	1070	1774	5793	20	36	32	55.3673	113.209	269.866	1.0196	1.9099	1.9873	146.148	1.63893333333333	-6.47853	5.14329783469316e-27	3.6886589115345e-24	NC_058145.1	11855100	11855780	+	LOC123225975	--	K13993 HSP20 family protein | (RefSeq) LOW QUALITY PROTEIN: 18.2 kDa class I heat shock protein-like (A)	ko04141: Protein processing in endoplasmic reticulum	LOW QUALITY PROTEIN: 18.2 kDa class I heat shock protein-like [Mangifera indica]	HSP12_MEDSA RecName: Full=18.2 kDa class I heat shock protein;	A0A0H3UZ51_MANIN SubName: Full=Heat-shock protein 17.6 {ECO:0000313|EMBL:AJA79008.1};	Molecular chaperone (small heat-shock protein Hsp26/Hsp42)	GO:0005737,cytoplasm; GO:0005575,cellular_component; GO:0005622,intracellular anatomical structure; GO:0110165,cellular anatomical entity	PF00011.24:Hsp20/alpha crystallin family	--	--	--
LOC123215370	671	912	1068	16632	18349	10692	24.3908	40.8843	34.9502	595.658	683.849	466.441	33.4084333333333	581.982366666667	4.12269120682167	1.3913663121496e-26	9.76164456347911e-24	NC_058141.1	12262322	12264399	+	LOC123215370	--	K03263 translation initiation factor 5A | (RefSeq) eukaryotic translation initiation factor 5A-like (A)	--	eukaryotic translation initiation factor 5A-like [Mangifera indica]	IF5A_MANES RecName: Full=Eukaryotic translation initiation factor 5A; Short=eIF-5A;	A0A8B8QKJ8_9MYRT RecName: Full=Eukaryotic translation initiation factor 5A {ECO:0000256|RuleBase:RU362005}; Short=eIF-5A {ECO:0000256|RuleBase:RU362005};	Translation initiation factor 5A (eIF-5A)	GO:0043022,ribosome binding; GO:0003723,RNA binding; GO:0003746,translation elongation factor activity; GO:0003743,translation initiation factor activity; GO:0045901,positive regulation of translational elongation; GO:0045905,positive regulation of translational termination; GO:0003674,molecular_function; GO:0005488,binding; GO:0043021,ribonucleoprotein complex binding; GO:0044877,protein-contain…	PF01287.23:Eukaryotic elongation factor 5A hypusine, DNA-binding OB fold	--	--	--
LOC123192069	156	152	229	2834	3004	1710	3.2673	3.9262	4.318	58.4815	64.508	42.9833	3.83716666666667	55.3242666666667	3.84979908834243	1.63954483747181e-26	1.12580916041974e-23	NC_058148.1	12129393	12134196	+	LOC123192069	--	K14003 prolactin regulatory element-binding protein | (RefSeq) SEC12-like protein 1 (A)	ko04141: Protein processing in endoplasmic reticulum	SEC12-like protein 1 [Mangifera indica]	PHF1_ARATH RecName: Full=SEC12-like protein 1; AltName: Full=Protein PHOSPHATE TRANSPORTER TRAFFIC FACILITATOR 1; Short=PHF-1;	V4T9A3_CITCL SubName: Full=Uncharacterized protein {ECO:0000313|EMBL:ESR49822.1};	Prolactin regulatory element-binding protein/Protein transport protein SEC12p	GO:0005783,endoplasmic reticulum; GO:0030176,integral component of endoplasmic reticulum membrane; GO:0005886,plasma membrane; GO:0005096,GTPase activator activity; GO:0005085,guanyl-nucleotide exchange factor activity; GO:0016036,cellular response to phosphate starvation; GO:0006888,endoplasmic reticulum to Golgi vesicle-mediated transport; GO:0006817,phosphate ion transport; GO:0009306,protein …	PF00400.35:WD domain, G-beta repeat	--	--	--
LOC123224940	22	44	42	1095	1041	1098	0.4611	1.1372	0.7924	22.6095	22.3678	27.6162	0.7969	24.1978333333333	4.92433536741082	1.83153710607802e-26	1.23144160467616e-23	NC_058145.1	14968542	14973278	+	LOC123224940	--	K26385 lysine histidine transporter | (RefSeq) lysine histidine transporter-like 6 (A)	--	GABA transporter 1-like [Mangifera indica]	GAT1_ARATH RecName: Full=GABA transporter 1; Short=AtGAT1; AltName: Full=Bidirectional amino acid transporter 1;	A0A6A1VA82_9ROSI SubName: Full=GABA transporter 1 {ECO:0000313|EMBL:KAB1209395.1};	Amino acid transporters	GO:0016021,integral component of membrane; GO:0016020,membrane; GO:0005886,plasma membrane; GO:0015171,amino acid transmembrane transporter activity; GO:0015185,gamma-aminobutyric acid transmembrane transporter activity; GO:0003333,amino acid transmembrane transport; GO:0015812,gamma-aminobutyric acid transport; GO:0003674,molecular_function; GO:0005215,transporter activity; GO:0005342,organic ac…	PF01490.21:Transmembrane amino acid transporter protein	--	--	--
LOC123221638	5938	5023	8052	544	268	156	100.258	104.593	122.394	9.0496	4.6394	3.1611	109.082	5.6167	-4.27955	3.50891164572387e-26	2.31108378658054e-23	NC_058143.1	8184643	8187765	-	LOC123221638	--	K09571 FK506-binding protein 4/5 [EC:5.2.1.8] | (RefSeq) peptidyl-prolyl cis-trans isomerase FKBP62-like (A)	--	peptidyl-prolyl cis-trans isomerase FKBP62-like [Mangifera indica]	FKB65_ARATH RecName: Full=Peptidyl-prolyl cis-trans isomerase FKBP65; Short=PPIase FKBP65; EC=5.2.1.8; AltName: Full=70 kDa peptidyl-prolyl isomerase; AltName: Full=FK506-binding protein 65; Short=AtFKBP65; AltName: Full=Immunophilin FKBP65; AltName: Full=Peptidyl-prolyl isomerase ROF2; AltName: Full=Protein ROTAMASE FKBP 2; AltName: Full=Rotamase;	A0A067KJY6_JATCU RecName: Full=Peptidylprolyl isomerase {ECO:0000256|PROSITE-ProRule:PRU00277}; EC=5.2.1.8 {ECO:0000256|PROSITE-ProRule:PRU00277};	FKBP-type peptidyl-prolyl cis-trans isomerase	GO:0005737,cytoplasm; GO:0005634,nucleus; GO:0000325,plant-type vacuole; GO:0009536,plastid; GO:0005516,calmodulin binding; GO:0003755,peptidyl-prolyl cis-trans isomerase activity; GO:0070370,cellular heat acclimation; GO:0061077,chaperone-mediated protein folding; GO:0000413,protein peptidyl-prolyl isomerization; GO:0003674,molecular_function; GO:0005488,binding; GO:0005515,protein binding; GO:0…	PF00254.31:FKBP-type peptidyl-prolyl cis-trans isomerase	--	--	--
LOC123203904	10	13	8	1208	556	441	0.1279	0.2051	0.0921	15.2231	7.2913	6.7696	0.1417	9.76133333333333	6.10616656044488	4.32657283695324e-26	2.79262970333984e-23	NC_058156.1	8258601	8264481	-	LOC123203904	--	K14776 ATP-dependent RNA helicase DDX10/DBP4 [EC:3.6.4.13] | (RefSeq) DEAD-box ATP-dependent RNA helicase 32 (A)	--	probable DEAD-box ATP-dependent RNA helicase 48 [Mangifera indica]	RH48_ARATH RecName: Full=Probable DEAD-box ATP-dependent RNA helicase 48; EC=3.6.4.13;	A0A067EX93_CITSI SubName: Full=Uncharacterized protein {ECO:0000313|EMBL:KDO55581.1};	ATP-dependent RNA helicase pitchoune	GO:0005524,ATP binding; GO:0016887,ATP hydrolysis activity; GO:0003723,RNA binding; GO:0003724,RNA helicase activity; GO:0000166,nucleotide binding; GO:0003674,molecular_function; GO:0005488,binding; GO:0017076,purine nucleotide binding; GO:0030554,adenyl nucleotide binding; GO:0032553,ribonucleotide binding; GO:0032555,purine ribonucleotide binding; GO:0032559,adenyl ribonucleotide binding; GO:0…	PF00270.32:DEAD/DEAH box helicase	--	--	--
LOC123209411	80	97	141	1624	1248	1077	0.8395	1.2554	1.3321	16.7911	13.4278	13.5642	1.14233333333333	14.5943666666667	3.67535600913191	1.946108078797e-25	1.23150482405913e-22	NC_058138.1	24188497	24195971	-	LOC123209411	--	K08675 ATP-dependent Lon protease [EC:3.4.21.53] | (RefSeq) lon protease homolog 1, mitochondrial-like (A)	--	lon protease homolog 1, mitochondrial-like [Mangifera indica]	LONM1_ARATH RecName: Full=Lon protease homolog 1, mitochondrial; EC=3.4.21.53 {ECO:0000255|HAMAP-Rule:MF_03120}; Flags: Precursor;	A0A5C7I836_9ROSI RecName: Full=Lon protease homolog, mitochondrial {ECO:0000256|HAMAP-Rule:MF_03120}; EC=3.4.21.53 {ECO:0000256|HAMAP-Rule:MF_03120};	Mitochondrial ATP-dependent protease PIM1/LON	GO:0005759,mitochondrial matrix; GO:0005739,mitochondrion; GO:0005524,ATP binding; GO:0016887,ATP hydrolysis activity; GO:0004176,ATP-dependent peptidase activity; GO:0043565,sequence-specific DNA binding; GO:0004252,serine-type endopeptidase activity; GO:0003697,single-stranded DNA binding; GO:0034599,cellular response to oxidative stress; GO:0051131,chaperone-mediated protein complex assembly; …	PF05362.16:Lon protease (S16) C-terminal proteolytic domain	--	--	--
LOC123227555	1922	2186	1128	61	74	44	34.3119	48.1284	18.1291	1.0729	1.3545	0.9427	33.5231333333333	1.12336666666667	-4.89926	4.3861746872087e-25	2.72221184000551e-22	NC_058146.1	4440491	4446174	+	LOC123227555	--	K24810 inhibitor of Bruton tyrosine kinase | (RefSeq) uncharacterized protein LOC123205021 isoform X1 (A)	--	ultraviolet-B receptor UVR8-like isoform X1 [Mangifera indica]	UVR8_ARATH RecName: Full=Ultraviolet-B receptor UVR8 {ECO:0000303|PubMed:12226503}; AltName: Full=Protein UV-B RESISTANCE 8 {ECO:0000303|PubMed:12226503}; AltName: Full=RCC1 domain-containing protein UVR8 {ECO:0000303|PubMed:12226503};	A0A1R3I240_9ROSI SubName: Full=Regulator of chromosome condensation, RCC1 {ECO:0000313|EMBL:OMO76643.1};	FOG: RCC1 domain	GO:0000785,chromatin; GO:0005829,cytosol; GO:0005634,nucleus; GO:0009536,plastid; GO:0003682,chromatin binding; GO:0005085,guanyl-nucleotide exchange factor activity; GO:0042802,identical protein binding; GO:0009881,photoreceptor activity; GO:0042803,protein homodimerization activity; GO:0009649,entrainment of circadian clock; GO:0009411,response to UV; GO:0010224,response to UV-B; GO:0003674,mol…	PF00415.21:Regulator of chromosome condensation (RCC1) repeat	--	--	--
LOC123194687	41	63	55	1408	1237	798	0.9781	1.8535	1.1812	33.0932	30.2552	22.8467	1.3376	28.7317	4.42492469927129	1.17912131230209e-24	7.17995888904255e-22	NC_058149.1	1236685	1239386	-	LOC123194687	--	K07297 adiponectin receptor | (RefSeq) heptahelical transmembrane protein 2 isoform X1 (A)	--	heptahelical transmembrane protein 2 isoform X1 [Mangifera indica]	HHP2_ARATH RecName: Full=Heptahelical transmembrane protein 2; AltName: Full=PAQR family protein HHP2;	A0A2H5P870_CITUN SubName: Full=Uncharacterized protein {ECO:0000313|EMBL:GAY48521.1};	Predicted membrane proteins, contain hemolysin III domain	GO:0016021,integral component of membrane; GO:0038023,signaling receptor activity; GO:0009725,response to hormone; GO:0009744,response to sucrose; GO:0003674,molecular_function; GO:0060089,molecular transducer activity; GO:0008150,biological_process; GO:0009719,response to endogenous stimulus; GO:0010033,response to organic substance; GO:0042221,response to chemical; GO:0050896,response to stimul…	PF03006.23:Haemolysin-III related	--	--	--
LOC123209393	4460	2997	4697	247	332	343	228.765	189.583	216.896	12.4825	17.4597	21.1146	211.747933333333	17.0189333333333	-3.63714	1.27827327344848e-24	7.63957654703757e-22	NC_058138.1	16590613	16591298	-	LOC123209393	--	K13993 HSP20 family protein | (RefSeq) 18.1 kDa class I heat shock protein-like (A)	ko04141: Protein processing in endoplasmic reticulum	18.1 kDa class I heat shock protein-like [Mangifera indica]	HSP12_MEDSA RecName: Full=18.2 kDa class I heat shock protein;	D6BR57_JATCU SubName: Full=Heat-shock protein {ECO:0000313|EMBL:ADB85094.1};	Molecular chaperone (small heat-shock protein Hsp26/Hsp42)	GO:0005737,cytoplasm; GO:0005575,cellular_component; GO:0005622,intracellular anatomical structure; GO:0110165,cellular anatomical entity	PF00011.24:Hsp20/alpha crystallin family	--	--	--
LOC123216458	2509	2345	3139	466	337	384	103.985	119.86	117.122	19.0286	14.3201	19.1001	113.655566666667	17.4829333333333	-2.70065	2.07203668975645e-24	1.21583345615473e-21	NC_058137.1	14529984	14531656	-	LOC123216458	--	K02701 photosystem I subunit PsaN | (RefSeq) photosystem I reaction center subunit N, chloroplastic-like (A)	ko00195: Photosynthesis; ko01100: Metabolic pathways	photosystem I reaction center subunit N, chloroplastic-like [Mangifera indica]	PSAN_ARATH RecName: Full=Photosystem I reaction center subunit N, chloroplastic; Short=PSI-N; Flags: Precursor;	A0A5N6QG98_9ROSI SubName: Full=Uncharacterized protein {ECO:0000313|EMBL:KAE7998342.1};	--	GO:0030093,chloroplast photosystem I; GO:0019904,protein domain specific binding; GO:0015979,photosynthesis; GO:0003674,molecular_function; GO:0005488,binding; GO:0005515,protein binding; GO:0008150,biological_process; GO:0008152,metabolic process; GO:0009987,cellular process; GO:0044237,cellular metabolic process; GO:0005575,cellular_component; GO:0005622,intracellular anatomical structure; GO:0…	PF05479.14:Photosystem I reaction centre subunit N (PSAN or PSI-N)	--	--	--
LOC123211939	2183	2562	2696	219	257	238	26.8107	38.8054	29.8092	2.65	3.2362	3.508	31.8084333333333	3.1314	-3.34453	2.41083410382646e-24	1.38937230415699e-21	NC_058139.1	6125738	6128602	-	LOC123211939	--	K03283 heat shock 70kDa protein 1/6/8 | (RefSeq) heat shock cognate 70 kDa protein-like (A)	ko03040: Spliceosome; ko04141: Protein processing in endoplasmic reticulum; ko04144: Endocytosis	heat shock cognate 70 kDa protein-like [Mangifera indica]	HSP7C_PETHY RecName: Full=Heat shock cognate 70 kDa protein;	A0A059BXX8_EUCGR SubName: Full=Uncharacterized protein {ECO:0000313|EMBL:KCW70839.1};	Molecular chaperones HSP70/HSC70, HSP70 superfamily	GO:0005524,ATP binding; GO:0140662,ATP-dependent protein folding chaperone; GO:0000166,nucleotide binding; GO:0003674,molecular_function; GO:0005488,binding; GO:0017076,purine nucleotide binding; GO:0030554,adenyl nucleotide binding; GO:0032553,ribonucleotide binding; GO:0032555,purine ribonucleotide binding; GO:0032559,adenyl ribonucleotide binding; GO:0035639,purine ribonucleoside triphosphate …	PF00012.23:Hsp70 protein	--	--	--
LOC123204950	1993	1513	2560	251	300	193	20.2562	18.9648	23.4243	2.5135	3.1262	2.3542	20.8817666666667	2.66463333333333	-2.97023	4.12759458311509e-24	2.33701508738374e-21	NC_058156.1	704571	711106	+	LOC123204950	--	K13447 respiratory burst oxidase [EC:1.6.3.- 1.11.1.-] | (RefSeq) respiratory burst oxidase homolog protein A-like (A)	ko04016: MAPK signaling pathway - plant; ko04626: Plant-pathogen interaction	respiratory burst oxidase homolog protein A-like [Mangifera indica]	RBOHA_SOLTU RecName: Full=Respiratory burst oxidase homolog protein A; EC=1.11.1.-; EC=1.6.3.-; AltName: Full=NADPH oxidase RBOHA; AltName: Full=StRBOHA;	V4SXS6_CITCL SubName: Full=Uncharacterized protein {ECO:0000313|EMBL:ESR52693.1};	Ferric reductase, NADH/NADPH oxidase and related proteins	GO:0016021,integral component of membrane; GO:0005886,plasma membrane; GO:0005509,calcium ion binding; GO:0000293,ferric-chelate reductase activity; GO:0016174,NAD(P)H oxidase H2O2-forming activity; GO:0004601,peroxidase activity; GO:0003674,molecular_function; GO:0005488,binding; GO:0043167,ion binding; GO:0043169,cation binding; GO:0046872,metal ion binding; GO:0003824,catalytic activity; GO:00…	PF08030.15:Ferric reductase NAD binding domain	--	--	--
LOC123220764	1212	978	1774	219	194	179	27.5315	27.3984	36.2791	4.9014	4.5183	4.8799	30.403	4.76653333333333	-2.6732	7.23675648769202e-24	4.02675589874629e-21	NC_058143.1	20614844	20616733	+	LOC123220764	--	K09651 rhomboid-related protein 4 [EC:3.4.21.105] | (RefSeq) rhomboid-like protein 14, mitochondrial isoform X1 (A)	--	rhomboid-like protein 14, mitochondrial isoform X1 [Mangifera indica]	RBL14_ARATH RecName: Full=Rhomboid-like protein 14, mitochondrial {ECO:0000303|PubMed:17181860}; Short=AtRBL14 {ECO:0000303|PubMed:17181860}; EC=3.4.21.- {ECO:0000305}; Flags: Precursor;	A0A067DVL8_CITSI RecName: Full=RanBP2-type domain-containing protein {ECO:0000259|PROSITE:PS50199};	Rhomboid family proteins	GO:0016021,integral component of membrane; GO:0031966,mitochondrial membrane; GO:0005886,plasma membrane; GO:0046872,metal ion binding; GO:0004252,serine-type endopeptidase activity; GO:0006508,proteolysis; GO:0003674,molecular_function; GO:0005488,binding; GO:0043167,ion binding; GO:0043169,cation binding; GO:0003824,catalytic activity; GO:0004175,endopeptidase activity; GO:0008233,peptidase act…	PF01694.25:Rhomboid family	--	--	--
LOC123200068	20034	24352	27343	321	806	865	933.683	1399.67	1147.24	14.7396	38.5133	48.3818	1160.19646666667	33.8782333333333	-5.09787	8.8897033552283e-24	4.84045088702918e-21	NC_058153.1	5168293	5169047	-	LOC123200068	--	K13993 HSP20 family protein | (RefSeq) 17.9 kDa class II heat shock protein-like (A)	ko04141: Protein processing in endoplasmic reticulum	17.9 kDa class II heat shock protein-like [Mangifera indica]	HSP21_SOYBN RecName: Full=17.9 kDa class II heat shock protein;	A0A6M2F930_9ROSI RecName: Full=SHSP domain-containing protein {ECO:0000259|PROSITE:PS01031};	Molecular chaperone (small heat-shock protein Hsp26/Hsp42)	GO:0005737,cytoplasm; GO:0043621,protein self-association; GO:0051082,unfolded protein binding; GO:0051259,protein complex oligomerization; GO:0006457,protein folding; GO:0009408,response to heat; GO:0042542,response to hydrogen peroxide; GO:0009651,response to salt stress; GO:0003674,molecular_function; GO:0005488,binding; GO:0005515,protein binding; GO:0008150,biological_process; GO:0009987,cel…	PF00011.24:Hsp20/alpha crystallin family	--	--	--
LOC123203348	559	747	770	9469	10145	9612	17.7202	29.2035	21.9747	295.739	329.725	365.682	22.9661333333333	330.382	3.84655563952376	8.99907207950147e-24	4.84045088702918e-21	NC_058155.1	9632292	9634349	-	LOC123203348	--	K06630 14-3-3 protein epsilon | (RefSeq) 14-3-3-like protein B (A)	--	14-3-3-like protein B [Mangifera indica]	1433B_SOYBN RecName: Full=14-3-3-like protein B; AltName: Full=SGF14B; Flags: Fragment;	D9Z6D3_GOSHI SubName: Full=14-3-3-like protein B {ECO:0000313|RefSeq:XP_016687111.1}; SubName: Full=14-3-3f protein {ECO:0000313|EMBL:ADK93079.1};	Multifunctional chaperone (14-3-3 family)	GO:0005737,cytoplasm; GO:0008104,protein localization; GO:0007165,signal transduction; GO:0008150,biological_process; GO:0009987,cellular process; GO:0033036,macromolecule localization; GO:0051179,localization; GO:0051641,cellular localization; GO:0070727,cellular macromolecule localization; GO:0007154,cell communication; GO:0023052,signaling; GO:0050789,regulation of biological process; GO:00507…	PF00244.23:14-3-3 protein	--	--	--
LOC123222379	30555	18742	25351	3124	3188	2252	1272.34	962.491	950.37	128.169	136.108	112.545	1061.73473333333	125.607	-3.07943	1.56813567980619e-23	8.29646603186643e-21	NC_058144.1	13618861	13619705	+	LOC123222379	--	K02692 photosystem I subunit II | (RefSeq) photosystem I reaction center subunit II, chloroplastic-like (A)	ko00195: Photosynthesis; ko01100: Metabolic pathways	photosystem I reaction center subunit II, chloroplastic-like [Mangifera indica]	PSAD_CUCSA RecName: Full=Photosystem I reaction center subunit II, chloroplastic; AltName: Full=PS I subunit 5; AltName: Full=Photosystem I 20 kDa subunit; Short=PSI-D; Flags: Precursor;	A8C1B5_CITSI RecName: Full=Photosystem I reaction center subunit II, chloroplastic {ECO:0000256|RuleBase:RU368104};	--	GO:0009535,chloroplast thylakoid membrane; GO:0009538,photosystem I reaction center; GO:0015979,photosynthesis; GO:0008150,biological_process; GO:0008152,metabolic process; GO:0009987,cellular process; GO:0044237,cellular metabolic process; GO:0005575,cellular_component; GO:0005622,intracellular anatomical structure; GO:0005737,cytoplasm; GO:0009507,chloroplast; GO:0009526,plastid envelope; GO:00…	PF02531.19:PsaD	--	--	--
LOC123228144	2928	3658	4240	395	437	234	66.6408	102.677	86.8782	8.8576	10.1975	6.3917	85.3985666666667	8.48226666666667	-3.33169	2.36059817057183e-23	1.22876749611072e-20	NC_058146.1	133964	137177	+	LOC123228144	--	--	--	B-box zinc finger protein 19-like isoform X2 [Mangifera indica]	BBX19_ARATH RecName: Full=B-box zinc finger protein 19 {ECO:0000303|PubMed:19920209}; AltName: Full=Protein DOUBLE B-BOX 1B; AltName: Full=Protein SALT TOLERANCE HOMOLOG 5;	A0A067EG40_CITSI SubName: Full=Uncharacterized protein {ECO:0000313|EMBL:KDO49886.1};	--	GO:0005634,nucleus; GO:0008270,zinc ion binding; GO:0010100,negative regulation of photomorphogenesis; GO:0009640,photomorphogenesis; GO:0006355,regulation of DNA-templated transcription; GO:0003674,molecular_function; GO:0005488,binding; GO:0043167,ion binding; GO:0043169,cation binding; GO:0046872,metal ion binding; GO:0046914,transition metal ion binding; GO:0007275,multicellular organism deve…	PF00643.27:B-box zinc finger	DBB	TF	DBB
LOC123192654	339	212	392	4505	7961	5722	10.0238	7.7308	10.435	131.243	241.348	203.055	9.39653333333333	191.881933333333	4.3519464696656	4.84115114569949e-23	2.47997572897079e-20	NC_058148.1	10357922	10359111	+	LOC123192654	--	K14496 abscisic acid receptor PYR/PYL family | (RefSeq) abscisic acid receptor PYL4-like (A)	ko04016: MAPK signaling pathway - plant; ko04075: Plant hormone signal transduction	abscisic acid receptor PYL4-like [Mangifera indica]	PYL4_ARATH RecName: Full=Abscisic acid receptor PYL4 {ECO:0000303|PubMed:19407142, ECO:0000303|PubMed:19624469, ECO:0000303|PubMed:19898420, ECO:0000303|PubMed:21658606, ECO:0000303|PubMed:23844015, ECO:0000303|PubMed:24563205}; AltName: Full=ABI1-binding protein 2 {ECO:0000303|PubMed:19874541}; AltName: Full=PYR1-like protein 4 {ECO:0000303|PubMed:19407142, ECO:0000303|PubMed:19624469, ECO:00003…	A0A067FZG6_CITSI SubName: Full=Uncharacterized protein {ECO:0000313|EMBL:KDO68852.1};	--	GO:0005737,cytoplasm; GO:0005634,nucleus; GO:0009705,plant-type vacuole membrane; GO:0005886,plasma membrane; GO:0010427,abscisic acid binding; GO:0042803,protein homodimerization activity; GO:0004864,protein phosphatase inhibitor activity; GO:0038023,signaling receptor activity; GO:0044389,ubiquitin-like protein ligase binding; GO:0009738,abscisic acid-activated signaling pathway; GO:0080163,reg…	PF10604.12:Polyketide cyclase / dehydrase and lipid transport	--	--	--
LOC123196408	33	26	31	544	469	548	0.3588	0.3487	0.3035	5.828	5.2286	7.1513	0.337	6.0693	4.1707096369688	6.06016223366635e-23	3.05593149636116e-20	NC_058150.1	2430516	2433751	-	LOC123196408	--	K13457 disease resistance protein RPM1 | (RefSeq) disease resistance protein RPM1-like (A)	ko04626: Plant-pathogen interaction	disease resistance protein RPM1-like [Mangifera indica]	RPM1_ARATH RecName: Full=Disease resistance protein RPM1 {ECO:0000303|PubMed:7638602}; AltName: Full=Resistance to Pseudomonas syringae protein 3 {ECO:0000303|PubMed:9861059}; AltName: Full=Resistance to Pseudomonas syringae pv. Maculicola protein 1 {ECO:0000303|PubMed:7638602};	A0A6P5WLR8_DURZI SubName: Full=disease resistance protein RPM1-like isoform X1 {ECO:0000313|RefSeq:XP_022717050.1};	Apoptotic ATPase	GO:0012505,endomembrane system; GO:0019897,extrinsic component of plasma membrane; GO:0005886,plasma membrane; GO:0043531,ADP binding; GO:0005524,ATP binding; GO:0000166,nucleotide binding; GO:0009626,plant-type hypersensitive response; GO:0003674,molecular_function; GO:0005488,binding; GO:0017076,purine nucleotide binding; GO:0030554,adenyl nucleotide binding; GO:0032553,ribonucleotide binding; …	PF00931.25:NB-ARC domain	--	--	--
LOC123212106	1702	2151	1311	120	82	96	29.0435	45.2678	20.1404	2.0175	1.4347	1.9661	31.4839	1.8061	-4.12366	6.32776563887876e-23	3.1417843148236e-20	NC_058139.1	2019906	2023299	-	LOC123212106	--	K26548 MFS transporter, POT/PTR family, nitrate transporter | (RefSeq) protein NRT1/ PTR FAMILY 4.6-like (A)	--	protein NRT1/ PTR FAMILY 4.6-like [Mangifera indica]	PTR19_ARATH RecName: Full=Protein NRT1/ PTR FAMILY 4.6; Short=AtNPF4.6; AltName: Full=Nitrate transporter 1.2; AltName: Full=Nitrate transporter NTL1; AltName: Full=Protein ABA-IMPORTING TRANSPORTER 1;	A0A5C7H1Q2_9ROSI SubName: Full=Uncharacterized protein {ECO:0000313|EMBL:TXG50422.1};	H+/oligopeptide symporter	GO:0016021,integral component of membrane; GO:0005886,plasma membrane; GO:0090440,abscisic acid transmembrane transporter activity; GO:0015293,symporter activity; GO:0080168,abscisic acid transport; GO:0042128,nitrate assimilation; GO:0010119,regulation of stomatal movement; GO:0009624,response to nematode; GO:0003674,molecular_function; GO:0005215,transporter activity; GO:0005319,lipid transport…	PF00854.24:POT family	--	--	--
LOC123201531	3983	3986	6196	999	730	728	118.07	145.722	165.354	29.1771	22.1868	25.8996	143.048466666667	25.7545	-2.47361	1.01724696306437e-22	4.97418352105701e-20	NC_058154.1	1069624	1072365	-	LOC123201531	--	K07025 putative hydrolase of the HAD superfamily | (RefSeq) uncharacterized protein LOC123201531 (A)	--	uncharacterized protein LOC123201531 [Mangifera indica]	--	V4US27_CITCL SubName: Full=Uncharacterized protein {ECO:0000313|EMBL:ESR42354.1};	Haloacid dehalogenase-like hydrolase	--	PF13419.9:Haloacid dehalogenase-like hydrolase	--	--	--
LOC123215947	1740	1350	1695	155	150	183	41.2289	39.4498	36.1574	3.6185	3.6441	5.204	38.9453666666667	4.15553333333333	-3.22835	1.10090659229109e-22	5.30291917209112e-20	NC_058141.1	5862049	5864318	-	LOC123215947	--	K08235 xyloglucan:xyloglucosyl transferase [EC:2.4.1.207] | (RefSeq) LOW QUALITY PROTEIN: probable xyloglucan endotransglucosylase/hydrolase protein 28 (A)	--	LOW QUALITY PROTEIN: probable xyloglucan endotransglucosylase/hydrolase protein 28 [Mangifera indica]	XTH28_ARATH RecName: Full=Probable xyloglucan endotransglucosylase/hydrolase protein 28; Short=At-XTH28; Short=XTH-28; EC=2.4.1.207; Flags: Precursor;	V4UB08_CITCL RecName: Full=Xyloglucan endotransglucosylase/hydrolase {ECO:0000256|RuleBase:RU361120}; EC=2.4.1.207 {ECO:0000256|RuleBase:RU361120};	--	GO:0048046,apoplast; GO:0004553,hydrolase activity, hydrolyzing O-glycosyl compounds; GO:0030247,polysaccharide binding; GO:0016762,xyloglucan:xyloglucosyl transferase activity; GO:0042546,cell wall biogenesis; GO:0071555,cell wall organization; GO:0010154,fruit development; GO:0080086,stamen filament development; GO:0010411,xyloglucan metabolic process; GO:0003674,molecular_function; GO:0003824,…	PF00722.24:Glycosyl hydrolases family 16	--	--	--
LOC123197972	181	190	271	3781	2490	1735	2.8344	3.6693	3.8205	58.3353	39.9778	32.6069	3.4414	43.64	3.66458360773535	1.2593409228434e-22	5.97686905925371e-20	NC_058138.1	18652223	18657376	+	LOC123197972	--	--	--	uncharacterized protein LOC123197972 isoform X1 [Mangifera indica]	--	A0A2H5NEM3_CITUN RecName: Full=RING-CH-type domain-containing protein {ECO:0000259|PROSITE:PS51292};	Protein involved in mRNA turnover and stability	GO:0016021,integral component of membrane; GO:0008270,zinc ion binding; GO:0003674,molecular_function; GO:0005488,binding; GO:0043167,ion binding; GO:0043169,cation binding; GO:0046872,metal ion binding; GO:0046914,transition metal ion binding; GO:0005575,cellular_component; GO:0016020,membrane; GO:0031224,intrinsic component of membrane; GO:0110165,cellular anatomical entity	PF12906.10:RING-variant domain	--	--	--
LOC123227489	156	170	182	4299	2161	1954	1.5674	2.1065	1.6463	42.5578	22.2619	23.5625	1.7734	29.4607333333333	4.05420345647282	1.97077365791469e-22	9.21779395099721e-20	NC_058146.1	15592791	15602732	+	LOC123227489	--	K13418 somatic embryogenesis receptor kinase 1 [EC:2.7.10.1 2.7.11.1] | (RefSeq) somatic embryogenesis receptor kinase 2-like isoform X1 (A)	--	probable LRR receptor-like serine/threonine-protein kinase At1g56140 isoform X1 [Mangifera indica]	Y5614_ARATH RecName: Full=Probable LRR receptor-like serine/threonine-protein kinase At1g56140; EC=2.7.11.1; Flags: Precursor;	A0A2H5N1G6_CITUN SubName: Full=Uncharacterized protein {ECO:0000313|EMBL:GAY33767.1}; Flags: Fragment;	--	GO:0016021,integral component of membrane; GO:0005886,plasma membrane; GO:0005524,ATP binding; GO:0106310,protein serine kinase activity; GO:0004674,protein serine/threonine kinase activity; GO:0006468,protein phosphorylation; GO:0000166,nucleotide binding; GO:0003674,molecular_function; GO:0005488,binding; GO:0017076,purine nucleotide binding; GO:0030554,adenyl nucleotide binding; GO:0032553,rib…	PF07714.20:Protein tyrosine and serine/threonine kinase	--	--	--
LOC123198589	3450	2673	3951	54	107	158	91.9653	87.8744	94.8173	1.4182	2.9244	5.0547	91.5523333333333	3.13243333333333	-4.86924	3.63483608130801e-22	1.67581521217219e-19	NC_058152.1	654288	655783	-	LOC123198589	--	K13513 lysocardiolipin and lysophospholipid acyltransferase [EC:2.3.1.- 2.3.1.51] | (RefSeq) probable 1-acyl-sn-glycerol-3-phosphate acyltransferase 4 isoform X1 (A)	ko00561: Glycerolipid metabolism; ko00564: Glycerophospholipid metabolism; ko01100: Metabolic pathways; ko01110: Biosynthesis of secondary metabolites	thaumatin-like protein 1 [Mangifera indica]	THLP1_ARATH RecName: Full=Thaumatin-like protein 1 {ECO:0000303|PubMed:15988566}; Short=AtTLP1 {ECO:0000303|PubMed:15988566}; Flags: Precursor;	A0A1R3GCM5_COCAP SubName: Full=Thaumatin {ECO:0000313|EMBL:OMO55816.1};	--	GO:0006952,defense response; GO:0009617,response to bacterium; GO:0009723,response to ethylene; GO:0006950,response to stress; GO:0008150,biological_process; GO:0050896,response to stimulus; GO:0009605,response to external stimulus; GO:0009607,response to biotic stimulus; GO:0043207,response to external biotic stimulus; GO:0044419,biological process involved in interspecies interaction between or…	PF00314.20:Thaumatin family	--	--	--
LOC123212376	40	77	40	2131	2160	1308	1.416	3.3616	1.2748	74.3232	78.3953	55.5692	2.01746666666667	69.4292333333333	5.10492649861429	4.55858560392308e-22	2.07210187599169e-19	NC_058137.1	25689702	25691820	-	LOC123212376	--	--	--	uncharacterized protein LOC123212376 [Mangifera indica]	--	A0A067ETL5_CITSI SubName: Full=Uncharacterized protein {ECO:0000313|EMBL:KDO58524.1};	--	GO:0016021,integral component of membrane; GO:0005575,cellular_component; GO:0016020,membrane; GO:0031224,intrinsic component of membrane; GO:0110165,cellular anatomical entity	PF11282.11:Protein of unknown function (DUF3082)	--	--	--
LOC123197219	8174	11274	5775	562	484	343	166.637	283.449	105.99	11.2882	10.1164	8.392	185.358833333333	9.9322	-4.22206	5.91856635526574e-22	2.65291516643738e-19	NC_058151.1	13313000	13316640	-	LOC123197219	--	--	--	uncharacterized protein LOC123197219 [Mangifera indica]	--	A0A5C7HKP9_9ROSI SubName: Full=Uncharacterized protein {ECO:0000313|EMBL:TXG57610.1};	--	--	PF14234.9:Domain of unknown function (DUF4336)	--	--	--
LOC123195855	29	47	42	783	832	585	0.5082	1.0157	0.6626	13.5184	14.948	12.3028	0.728833333333333	13.5897333333333	4.22078439406349	7.9627175711339e-22	3.52028471470143e-19	NC_058150.1	5826930	5828937	-	LOC123195855	--	--	--	putative pentatricopeptide repeat-containing protein At1g03510 [Mangifera indica]	PPR7_ARATH RecName: Full=Putative pentatricopeptide repeat-containing protein At1g03510;	A0A5C7HDL5_9ROSI SubName: Full=Uncharacterized protein {ECO:0000313|EMBL:TXG55243.1};	FOG: PPR repeat	GO:0043231,intracellular membrane-bounded organelle; GO:0003723,RNA binding; GO:0009451,RNA modification; GO:0003674,molecular_function; GO:0003676,nucleic acid binding; GO:0005488,binding; GO:0097159,organic cyclic compound binding; GO:1901363,heterocyclic compound binding; GO:0006139,nucleobase-containing compound metabolic process; GO:0006725,cellular aromatic compound metabolic process; GO:00…	PF01535.23:PPR repeat	--	--	--
LOC123216587	719	429	781	95	64	54	13.7272	10.1011	13.4239	1.787	1.2528	1.2373	12.4174	1.4257	-3.12262	8.557023262765e-22	3.73190286161101e-19	NC_058141.1	18773397	18775317	-	LOC123216587	--	K20624 12-hydroxyjasmonoyl-L-amino acid 12-hydroxylase / fatty acid hydroxylase [EC:1.14.14.49] | (RefSeq) cytochrome P450 94C1 (A)	--	cytochrome P450 94C1 [Pistacia vera]	C94C1_ARATH RecName: Full=Cytochrome P450 94C1 {ECO:0000305}; EC=1.14.14.49 {ECO:0000269|PubMed:22215670, ECO:0000269|PubMed:26164240}; AltName: Full=12-hydroxyjasmonoyl-L-amino acid 12-hydroxylase {ECO:0000303|PubMed:22215670};	A0A0D2RRD9_GOSRA SubName: Full=Uncharacterized protein {ECO:0000313|EMBL:KJB21690.1};	Cytochrome P450 CYP4/CYP19/CYP26 subfamilies	GO:0005789,endoplasmic reticulum membrane; GO:0016021,integral component of membrane; GO:0043231,intracellular membrane-bounded organelle; GO:0018685,alkane 1-monooxygenase activity; GO:0020037,heme binding; GO:0005506,iron ion binding; GO:0009611,response to wounding; GO:0003674,molecular_function; GO:0003824,catalytic activity; GO:0004497,monooxygenase activity; GO:0016491,oxidoreductase activi…	--	--	--	--
LOC123199981	381	200	336	17	17	18	16.9698	10.986	13.4731	0.746	0.7763	0.9622	13.8096333333333	0.828166666666667	-4.05961	9.0956435003061e-22	3.91391603580505e-19	NC_058153.1	5123409	5124198	+	LOC123199981	--	K13993 HSP20 family protein | (RefSeq) 17.3 kDa class II heat shock protein-like (A)	ko04141: Protein processing in endoplasmic reticulum	17.3 kDa class II heat shock protein-like [Mangifera indica]	HSP21_SOYBN RecName: Full=17.9 kDa class II heat shock protein;	A0A6M2F930_9ROSI RecName: Full=SHSP domain-containing protein {ECO:0000259|PROSITE:PS01031};	Molecular chaperone (small heat-shock protein Hsp26/Hsp42)	GO:0005737,cytoplasm; GO:0043621,protein self-association; GO:0051082,unfolded protein binding; GO:0051259,protein complex oligomerization; GO:0006457,protein folding; GO:0009408,response to heat; GO:0042542,response to hydrogen peroxide; GO:0009651,response to salt stress; GO:0003674,molecular_function; GO:0005488,binding; GO:0005515,protein binding; GO:0008150,biological_process; GO:0009987,cel…	PF00011.24:Hsp20/alpha crystallin family	--	--	--
LOC123192947	2067	3143	2203	174	200	158	54.5209	102.241	52.3134	4.5219	5.4088	5.0017	69.6918333333333	4.97746666666667	-3.80751	1.00587718707505e-21	4.27140453400961e-19	NC_058148.1	13755582	13757335	-	LOC123192947	--	K09510 DnaJ homolog subfamily B member 4 | (RefSeq) dnaJ homolog subfamily B member 4-like (A)	--	dnaJ homolog subfamily B member 4-like [Mangifera indica]	DNJH_CUCSA RecName: Full=DnaJ protein homolog; AltName: Full=DNAJ-1; Flags: Precursor;	A0A061GF55_THECC SubName: Full=DNAJ heat shock family protein {ECO:0000313|EMBL:EOY28166.1};	Molecular chaperone (DnaJ superfamily)	GO:0005886,plasma membrane; GO:0005524,ATP binding; GO:0030544,Hsp70 protein binding; GO:0046872,metal ion binding; GO:0051082,unfolded protein binding; GO:0006457,protein folding; GO:0009408,response to heat; GO:0000166,nucleotide binding; GO:0003674,molecular_function; GO:0005488,binding; GO:0017076,purine nucleotide binding; GO:0030554,adenyl nucleotide binding; GO:0032553,ribonucleotide bindi…	PF01556.21:DnaJ C terminal domain	--	--	--
LOC123196610	157	163	173	1816	1902	1819	2.3781	3.0449	2.3591	27.1016	29.5382	33.0671	2.59403333333333	29.9023	3.52698753324146	1.49345497622486e-21	6.25951590229932e-19	NC_058138.1	7742597	7748016	-	LOC123196610	--	K17681 ATPase family AAA domain-containing protein 3A/B | (RefSeq) ATPase family AAA domain-containing protein 3-like (A)	--	ATPase family AAA domain-containing protein 3-like [Mangifera indica]	FTSH4_ARATH RecName: Full=ATP-dependent zinc metalloprotease FTSH 4, mitochondrial; Short=AtFTSH4; EC=3.4.24.-; Flags: Precursor;	A0A067E8N9_CITSI RecName: Full=AAA domain-containing protein {ECO:0000259|SMART:SM00382};	AAA+-type ATPase	GO:0009534,chloroplast thylakoid; GO:0016021,integral component of membrane; GO:0005743,mitochondrial inner membrane; GO:0005739,mitochondrion; GO:0005524,ATP binding; GO:0016887,ATP hydrolysis activity; GO:0004176,ATP-dependent peptidase activity; GO:0046872,metal ion binding; GO:0004222,metalloendopeptidase activity; GO:0010073,meristem maintenance; GO:0006508,proteolysis; GO:0000166,nucleotide…	PF12037.11:ATPase family AAA domain-containing protein 3, N-terminal	--	--	--
LOC123225021	12	23	7	1289	1077	539	0.2386	0.5639	0.1253	25.2469	21.9516	12.8596	0.309266666666667	20.0193666666667	6.01640117805686	2.8463883494082e-21	1.1777114256468e-18	NC_058145.1	10392252	10397058	+	LOC123225021	--	K24444 [histone H3]-dimethyl/trimethyl-L-lysine36 demethylase [EC:1.14.11.27 1.14.11.-] | (RefSeq) lysine-specific demethylase JMJ30-like isoform X1 (A)	--	lysine-specific demethylase JMJ30-like isoform X1 [Mangifera indica]	JMJ30_ARATH RecName: Full=Lysine-specific demethylase JMJ30 {ECO:0000303|PubMed:18713399}; Short=AtJMJ30 {ECO:0000303|PubMed:18713399}; EC=1.14.11.27 {ECO:0000269|PubMed:25132385}; EC=1.14.11.68 {ECO:0000269|PubMed:25267112}; EC=1.14.11.69 {ECO:0000269|PubMed:25132385}; AltName: Full=JmjC domain-containing protein 30 {ECO:0000303|PubMed:18713399}; AltName: Full=Jumonji domain-containing protein 5…	A0A067FBV2_CITSI RecName: Full=JmjC domain-containing protein {ECO:0000259|PROSITE:PS51184};	Uncharacterized conserved protein, contains JmjC domain	GO:0005737,cytoplasm; GO:0005783,endoplasmic reticulum; GO:0000791,euchromatin; GO:0005634,nucleus; GO:0016706,2-oxoglutarate-dependent dioxygenase activity; GO:0003700,DNA-binding transcription factor activity; GO:0061628,H3K27me3 modified histone binding; GO:0071558,histone H3-tri/di-methyl-lysine-27 demethylase activity; GO:0140681,histone H3-tri/dimethyl-lysine-36 demethylase activity; GO:014…	PF13621.9:Cupin-like domain	--	--	--
LOC123197336	199	191	268	2188	2582	1667	5.4662	6.4703	6.6274	59.2142	72.716	54.954	6.18796666666667	62.2947333333333	3.33157286630317	3.00189374026672e-21	1.22633059088137e-18	NC_058151.1	1070052	1072472	+	LOC123197336	--	K14496 abscisic acid receptor PYR/PYL family | (RefSeq) abscisic acid receptor PYL8-like (A)	ko04016: MAPK signaling pathway - plant; ko04075: Plant hormone signal transduction	abscisic acid receptor PYL8-like [Mangifera indica]	PYL8_ARATH RecName: Full=Abscisic acid receptor PYL8 {ECO:0000303|PubMed:19407142, ECO:0000303|PubMed:19624469}; AltName: Full=ABI1-binding protein 1 {ECO:0000303|PubMed:19874541}; AltName: Full=PYR1-like protein 8 {ECO:0000303|PubMed:19407142, ECO:0000303|PubMed:19624469}; AltName: Full=Regulatory components of ABA receptor 3 {ECO:0000303|PubMed:19407143};	A0A067EM00_CITSI SubName: Full=Uncharacterized protein {ECO:0000313|EMBL:KDO56108.1};	--	GO:0005737,cytoplasm; GO:0005829,cytosol; GO:0005634,nucleus; GO:0005886,plasma membrane; GO:0010427,abscisic acid binding; GO:0042803,protein homodimerization activity; GO:0004864,protein phosphatase inhibitor activity; GO:0038023,signaling receptor activity; GO:0009738,abscisic acid-activated signaling pathway; GO:0009789,positive regulation of abscisic acid-activated signaling pathway; GO:0080…	PF10604.12:Polyketide cyclase / dehydrase and lipid transport	--	--	--
LOC123214468	5	18	9	2238	1614	432	0.0499	0.2213	0.0808	21.9855	16.4997	5.1695	0.117333333333333	14.5515666666667	6.95441774813836	4.14822816001423e-21	1.66410364823771e-18	NC_058140.1	18691018	18698896	-	LOC123214468	--	K04077 chaperonin GroEL [EC:5.6.1.7] | (RefSeq) chaperonin 60 subunit beta 4, chloroplastic (A)	ko03018: RNA degradation	chaperonin 60 subunit beta 4, chloroplastic [Mangifera indica]	CPNB4_ARATH RecName: Full=Chaperonin 60 subunit beta 4, chloroplastic; Short=CPN-60 beta 4; Flags: Precursor;	A0A2H5QGF9_CITUN SubName: Full=Uncharacterized protein {ECO:0000313|EMBL:GAY63711.1};	Mitochondrial chaperonin, Cpn60/Hsp60p	GO:0009507,chloroplast; GO:0009941,chloroplast envelope; GO:0009570,chloroplast stroma; GO:0005524,ATP binding; GO:0140662,ATP-dependent protein folding chaperone; GO:0006457,protein folding; GO:0042026,protein refolding; GO:0000166,nucleotide binding; GO:0003674,molecular_function; GO:0005488,binding; GO:0017076,purine nucleotide binding; GO:0030554,adenyl nucleotide binding; GO:0032553,ribonucl…	PF00118.27:TCP-1/cpn60 chaperonin family	--	--	--
LOC123202328	657	1787	401	93799	117509	82395	17.8377	59.8352	9.8015	2509.12	3271.06	2684.78	29.1581333333333	2821.65373333333	6.59649878133527	4.17663048081228e-21	1.66410364823771e-18	NC_058154.1	11421351	11423262	+	LOC123202328	--	K03146 cysteine-dependent adenosine diphosphate thiazole synthase [EC:2.4.2.60] | (RefSeq) thiamine thiazole synthase, chloroplastic (A)	ko00730: Thiamine metabolism; ko01100: Metabolic pathways; ko01240: Biosynthesis of cofactors	thiamine thiazole synthase, chloroplastic [Mangifera indica]	THI4_CITSI RecName: Full=Thiamine thiazole synthase, chloroplastic {ECO:0000255|HAMAP-Rule:MF_03158}; EC=2.4.2.60 {ECO:0000255|HAMAP-Rule:MF_03158}; AltName: Full=Thiazole biosynthetic enzyme {ECO:0000255|HAMAP-Rule:MF_03158}; Flags: Precursor;	A0A067ECZ8_CITSI RecName: Full=Thiamine thiazole synthase, chloroplastic {ECO:0000256|HAMAP-Rule:MF_03158}; AltName: Full=Thiazole biosynthetic enzyme {ECO:0000256|HAMAP-Rule:MF_03158}; EC=2.4.2.60 {ECO:0000256|HAMAP-Rule:MF_03158};	Protein involved in thiamine biosynthesis and DNA damage tolerance	GO:0009570,chloroplast stroma; GO:0005829,cytosol; GO:0005506,iron ion binding; GO:0016763,pentosyltransferase activity; GO:0009228,thiamine biosynthetic process; GO:0052837,thiazole biosynthetic process; GO:0003674,molecular_function; GO:0005488,binding; GO:0043167,ion binding; GO:0043169,cation binding; GO:0046872,metal ion binding; GO:0046914,transition metal ion binding; GO:0003824,catalytic …	PF01946.20:Thi4 family	--	--	--
LOC123222966	347	197	590	7	9	15	8.6656	6.0673	13.2646	0.1722	0.2304	0.4496	9.3325	0.284066666666667	-5.03796	4.48026309559594e-21	1.76331135224595e-18	NC_058144.1	7253838	7255467	-	LOC123222966	--	K09422 transcription factor MYB, plant | (RefSeq) transcription factor MYB41 isoform X1 (A)	--	transcription factor MYB41 isoform X1 [Mangifera indica]	MY102_ARATH RecName: Full=Transcription factor MYB102 {ECO:0000305}; AltName: Full=Myb-related protein 102 {ECO:0000305}; Short=AtMYB102 {ECO:0000303|PubMed:12857823}; AltName: Full=Myb-related protein M4 {ECO:0000305}; Short=AtM4 {ECO:0000303|PubMed:8980549};	A0A5C7HF52_9ROSI SubName: Full=Uncharacterized protein {ECO:0000313|EMBL:TXG55275.1};	Transcription factor, Myb superfamily	GO:0005634,nucleus; GO:0003677,DNA binding; GO:0003700,DNA-binding transcription factor activity; GO:0006952,defense response; GO:0006355,regulation of DNA-templated transcription; GO:0006970,response to osmotic stress; GO:0009611,response to wounding; GO:0003674,molecular_function; GO:0003676,nucleic acid binding; GO:0005488,binding; GO:0097159,organic cyclic compound binding; GO:1901363,heteroc…	PF00249.34:Myb-like DNA-binding domain	MYB	TF	MYB->MYB
LOC123215709	1	5	2	559	545	207	0.0467	0.2878	0.084	25.7021	26.0764	11.5934	0.1395	21.1239666666667	7.24247183769081	7.92784549554179e-21	3.0825946708147e-18	NC_058141.1	3587199	3589472	-	LOC123215709	--	K11096 small nuclear ribonucleoprotein D2 | (RefSeq) probable small nuclear ribonucleoprotein Sm D2 (A)	ko03040: Spliceosome	probable small nuclear ribonucleoprotein Sm D2 [Mangifera indica]	LSM3B_ARATH RecName: Full=Sm-like protein LSM3B {ECO:0000305}; Short=AtLSM3B {ECO:0000303|PubMed:23620288}; AltName: Full=U6 snRNA-associated Sm-like protein LSM3B {ECO:0000305};	A0A1U8PCY2_GOSHI RecName: Full=Small nuclear ribonucleoprotein Sm D2 {ECO:0000256|RuleBase:RU365051}; Short=Sm-D2 {ECO:0000256|RuleBase:RU365051}; AltName: Full=snRNP core protein D2 {ECO:0000256|RuleBase:RU365051};	Small nuclear ribonucleoprotein (snRNP) Sm core protein	GO:0071013,catalytic step 2 spliceosome; GO:1990726,Lsm1-7-Pat1 complex; GO:0120115,Lsm2-8 complex; GO:0005739,mitochondrion; GO:0005634,nucleus; GO:0000932,P-body; GO:0071011,precatalytic spliceosome; GO:0046540,U4/U6 x U5 tri-snRNP complex; GO:0005688,U6 snRNP; GO:0003723,RNA binding; GO:0000290,deadenylation-dependent decapping of nuclear-transcribed mRNA; GO:0000398,mRNA splicing, via spliceo…	PF01423.25:LSM domain	--	--	--
LOC123206113	561	201	425	9	9	15	14.2217	6.2841	9.6996	0.2248	0.2339	0.4564	10.0684666666667	0.305033333333333	-5.04473	1.19449175411034e-20	4.58926575957179e-18	NC_058138.1	23915804	23917191	-	LOC123206113	--	--	--	uncharacterized serine-rich protein C215.13-like [Mangifera indica]	--	A0A061F4N8_THECC SubName: Full=Uncharacterized protein {ECO:0000313|EMBL:EOY11627.1};	--	--	PF07816.14:Protein of unknown function (DUF1645)	--	--	--
LOC123225219	8205	5688	4605	294	476	323	117.888	100.788	59.5656	4.1618	7.012	5.5696	92.7470666666667	5.58113333333333	-4.05467	1.30846103206354e-20	4.96799563385726e-18	NC_058145.1	1149431	1152483	-	LOC123225219	--	K04079 molecular chaperone HtpG | (RefSeq) heat shock protein 83 (A)	ko04141: Protein processing in endoplasmic reticulum; ko04626: Plant-pathogen interaction	heat shock protein 83 [Mangifera indica]	HSP83_IPONI RecName: Full=Heat shock protein 83;	A0A498KLI6_MALDO RecName: Full=HATPase_c domain-containing protein {ECO:0000259|SMART:SM00387};	Molecular chaperone (HSP90 family)	GO:0005737,cytoplasm; GO:0005524,ATP binding; GO:0016887,ATP hydrolysis activity; GO:0051082,unfolded protein binding; GO:0006457,protein folding; GO:0000166,nucleotide binding; GO:0003674,molecular_function; GO:0005488,binding; GO:0017076,purine nucleotide binding; GO:0030554,adenyl nucleotide binding; GO:0032553,ribonucleotide binding; GO:0032555,purine ribonucleotide binding; GO:0032559,adenyl…	PF00183.21:Hsp90 protein	--	--	--
LOC123208058	1015	455	1035	92	70	51	18.0103	9.9569	16.5338	1.6084	1.2735	1.0861	14.8336666666667	1.32266666666667	-3.48735	1.34726185026636e-20	5.05583508065655e-18	NC_058138.1	16354553	16359399	-	LOC123208058	--	K09843 (+)-abscisic acid 8'-hydroxylase [EC:1.14.14.137] | (RefSeq) abscisic acid 8'-hydroxylase 2 isoform X1 (A)	ko00906: Carotenoid biosynthesis; ko01110: Biosynthesis of secondary metabolites	abscisic acid 8'-hydroxylase 2 isoform X1 [Mangifera indica]	ABAH2_ARATH RecName: Full=Abscisic acid 8'-hydroxylase 2; Short=ABA 8'-hydroxylase 2; EC=1.14.14.137 {ECO:0000250|UniProtKB:Q949P1}; AltName: Full=Cytochrome P450 707A2;	V4SC51_CITCL SubName: Full=Uncharacterized protein {ECO:0000313|EMBL:ESR38107.1};	Cytochrome P450 CYP4/CYP19/CYP26 subfamilies	GO:0016021,integral component of membrane; GO:0010295,(+)-abscisic acid 8'-hydroxylase activity; GO:0020037,heme binding; GO:0005506,iron ion binding; GO:0004497,monooxygenase activity; GO:0016491,oxidoreductase activity; GO:0046345,abscisic acid catabolic process; GO:0009687,abscisic acid metabolic process; GO:0048838,release of seed from dormancy; GO:0010114,response to red light; GO:0009639,re…	PF00067.25:Cytochrome P450	--	--	--
LOC123193706	37	41	82	7005	3604	924	0.9201	1.2574	1.8357	171.625	91.8864	27.5758	1.33773333333333	97.0289	6.18055205737255	1.53692078299217e-20	5.70126947465588e-18	NC_058148.1	12135641	12142007	+	LOC123193706	--	--	--	phosphoglucan phosphatase DSP4, amyloplastic isoform X1 [Mangifera indica]	DSP4_CASSA RecName: Full=Phosphoglucan phosphatase DSP4, amyloplastic {ECO:0000250|UniProtKB:Q9FEB5}; EC=3.1.3.- {ECO:0000250|UniProtKB:Q9FEB5}; AltName: Full=Dual specificity protein phosphatase 4 {ECO:0000303|PubMed:21631532}; Short=CsDSP4 {ECO:0000303|PubMed:21631532}; Flags: Precursor;	A0A6P3ZFB7_ZIZJJ SubName: Full=phosphoglucan phosphatase DSP4, amyloplastic {ECO:0000313|RefSeq:XP_015876647.1};	Dual specificity phosphatase	GO:0009501,amyloplast; GO:0009507,chloroplast; GO:0005634,nucleus; GO:0019203,carbohydrate phosphatase activity; GO:0008138,protein tyrosine/serine/threonine phosphatase activity; GO:0007623,circadian rhythm; GO:0046838,phosphorylated carbohydrate dephosphorylation; GO:0006470,protein dephosphorylation; GO:0005982,starch metabolic process; GO:0003674,molecular_function; GO:0003824,catalytic activ…	PF16561.8:Glycogen recognition site of AMP-activated protein kinase	--	--	--
LOC123195114	119	111	130	1150	1112	969	2.0926	2.4072	2.058	19.9241	20.0484	20.4498	2.18593333333333	20.1407666666667	3.20379729374459	2.14372359921907e-20	7.86186269518147e-18	NC_058149.1	11525354	11527941	-	LOC123195114	--	K24193 MFS transporter, SP family, sugar:H+ symporter | (RefSeq) sugar transport protein 14-like (A)	--	sugar transport protein 14-like [Mangifera indica]	STP14_ARATH RecName: Full=Sugar transport protein 14; AltName: Full=Hexose transporter 14;	A0A8B8Q3P8_9MYRT SubName: Full=sugar transport protein 14 {ECO:0000313|RefSeq:XP_030541726.1};	Predicted transporter (major facilitator superfamily)	GO:0016021,integral component of membrane; GO:0005886,plasma membrane; GO:0015145,monosaccharide transmembrane transporter activity; GO:0015293,symporter activity; GO:0003674,molecular_function; GO:0005215,transporter activity; GO:0015144,carbohydrate transmembrane transporter activity; GO:0022857,transmembrane transporter activity; GO:0051119,sugar transmembrane transporter activity; GO:0015291,…	PF00083.27:Sugar (and other) transporter	--	--	--
LOC123225176	1276	2116	3250	50	59	113	65.8332	134.638	150.957	2.5416	3.121	6.9969	117.142866666667	4.21983333333333	-4.79494	2.40872362502006e-20	8.73446489328904e-18	NC_058145.1	11845182	11845863	+	LOC123225176	--	K13993 HSP20 family protein | (RefSeq) 18.2 kDa class I heat shock protein-like (A)	ko04141: Protein processing in endoplasmic reticulum	18.2 kDa class I heat shock protein-like [Mangifera indica]	HSP12_MEDSA RecName: Full=18.2 kDa class I heat shock protein;	A0A0H3UZ51_MANIN SubName: Full=Heat-shock protein 17.6 {ECO:0000313|EMBL:AJA79008.1};	Molecular chaperone (small heat-shock protein Hsp26/Hsp42)	GO:0005737,cytoplasm; GO:0005575,cellular_component; GO:0005622,intracellular anatomical structure; GO:0110165,cellular anatomical entity	PF00011.24:Hsp20/alpha crystallin family	--	--	--
LOC123202408	8	21	37	2960	1988	556	0.0799	0.2587	0.3327	29.1277	20.3576	6.6646	0.223766666666667	18.7166333333333	6.38618200062573	2.5268573744482e-20	9.06102978284074e-18	NC_058154.1	9255368	9263111	+	LOC123202408	--	K13418 somatic embryogenesis receptor kinase 1 [EC:2.7.10.1 2.7.11.1] | (RefSeq) somatic embryogenesis receptor kinase 2-like isoform X1 (A)	--	probable LRR receptor-like serine/threonine-protein kinase At1g53430 [Mangifera indica]	Y5343_ARATH RecName: Full=Probable LRR receptor-like serine/threonine-protein kinase At1g53430; EC=2.7.11.1; Flags: Precursor;	A0A067DHQ0_CITSI RecName: Full=Protein kinase domain-containing protein {ECO:0000259|PROSITE:PS50011};	--	GO:0016021,integral component of membrane; GO:0005886,plasma membrane; GO:0005524,ATP binding; GO:0106310,protein serine kinase activity; GO:0004674,protein serine/threonine kinase activity; GO:0006468,protein phosphorylation; GO:0000166,nucleotide binding; GO:0003674,molecular_function; GO:0005488,binding; GO:0017076,purine nucleotide binding; GO:0030554,adenyl nucleotide binding; GO:0032553,rib…	PF07714.20:Protein tyrosine and serine/threonine kinase	--	--	--
LOC123198390	4110	4501	3883	233	362	338	129.818	175.332	110.417	7.251	11.7232	12.8128	138.522466666667	10.5956666666667	-3.70857	2.63303678046087e-20	9.33802154019929e-18	NC_058151.1	13814846	13817884	+	LOC123198390	--	K09874 aquaporin NIP | (RefSeq) aquaporin NIP2-2-like (A)	--	aquaporin NIP2-2-like [Mangifera indica]	NIP22_MAIZE RecName: Full=Aquaporin NIP2-2; AltName: Full=NOD26-like intrinsic protein 2-2; AltName: Full=ZmNIP2-2; AltName: Full=ZmNIP2;2;	A0A4Y5QLY8_CITSI SubName: Full=Putative aquaporin NIP21 {ECO:0000313|EMBL:QCX35441.1};	Aquaporin (major intrinsic protein family)	GO:0016021,integral component of membrane; GO:0015267,channel activity; GO:0003674,molecular_function; GO:0005215,transporter activity; GO:0022803,passive transmembrane transporter activity; GO:0022857,transmembrane transporter activity; GO:0005575,cellular_component; GO:0016020,membrane; GO:0031224,intrinsic component of membrane; GO:0110165,cellular anatomical entity	PF00230.23:Major intrinsic protein	--	--	--
LOC123229840	4120	5626	12579	201	309	384	167.208	281.591	459.601	8.0372	12.8577	18.7036	302.799966666667	13.1995	-4.51981	2.90631942661246e-20	1.01951790059852e-17	NC_058147.1	16991515	16992381	-	LOC123229840	--	K13993 HSP20 family protein | (RefSeq) 22.0 kDa class IV heat shock protein (A)	ko04141: Protein processing in endoplasmic reticulum	22.0 kDa class IV heat shock protein [Mangifera indica]	HSP41_SOYBN RecName: Full=22.0 kDa class IV heat shock protein; Flags: Precursor;	A0A067DV78_CITSI SubName: Full=Uncharacterized protein {ECO:0000313|EMBL:KDO42942.1};	Molecular chaperone (small heat-shock protein Hsp26/Hsp42)	GO:0005788,endoplasmic reticulum lumen; GO:0043621,protein self-association; GO:0051082,unfolded protein binding; GO:0051259,protein complex oligomerization; GO:0006457,protein folding; GO:0009408,response to heat; GO:0042542,response to hydrogen peroxide; GO:0009651,response to salt stress; GO:0003674,molecular_function; GO:0005488,binding; GO:0005515,protein binding; GO:0008150,biological_proce…	PF00011.24:Hsp20/alpha crystallin family	--	--	--
LOC123198518	21	32	49	907	762	409	0.33	0.6202	0.6933	14.0437	12.2779	7.714	0.547833333333333	11.3452	4.37220118111945	3.31018774915781e-20	1.14870633579107e-17	NC_058152.1	3726371	3732659	-	LOC123198518	--	K14682 amino-acid N-acetyltransferase [EC:2.3.1.1] | (RefSeq) probable amino-acid acetyltransferase NAGS2, chloroplastic (A)	ko00220: Arginine biosynthesis; ko01100: Metabolic pathways; ko01110: Biosynthesis of secondary metabolites; ko01210: 2-Oxocarboxylic acid metabolism; ko01230: Biosynthesis of amino acids	probable amino-acid acetyltransferase NAGS2, chloroplastic [Mangifera indica]	NAGS2_ARATH RecName: Full=Probable amino-acid acetyltransferase NAGS2, chloroplastic; EC=2.3.1.1; AltName: Full=N-acetylglutamate synthase 2; Flags: Precursor;	A0A5C7HT16_9ROSI RecName: Full=Amino-acid N-acetyltransferase {ECO:0000256|ARBA:ARBA00012697}; EC=2.3.1.1 {ECO:0000256|ARBA:ARBA00012697};	Acetylglutamate kinase/acetylglutamate synthase	GO:0009507,chloroplast; GO:0004042,acetyl-CoA:L-glutamate N-acetyltransferase activity; GO:0103045,methione N-acyltransferase activity; GO:0006526,arginine biosynthetic process; GO:0003674,molecular_function; GO:0003824,catalytic activity; GO:0008080,N-acetyltransferase activity; GO:0016407,acetyltransferase activity; GO:0016410,N-acyltransferase activity; GO:0016740,transferase activity; GO:0016…	PF00696.31:Amino acid kinase family	GNAT	TR	GNAT
LOC123193943	1517	479	1873	65	56	62	48.7472	18.9827	54.1849	2.0579	1.845	2.3911	40.6382666666667	2.098	-4.27575	3.93655166060079e-20	1.35153544406989e-17	NC_058149.1	3435629	3436912	-	LOC123193943	--	K14504 xyloglucan:xyloglucosyl transferase TCH4 [EC:2.4.1.207] | (RefSeq) probable xyloglucan endotransglucosylase/hydrolase protein 23 (A)	ko04075: Plant hormone signal transduction	probable xyloglucan endotransglucosylase/hydrolase protein 23 [Mangifera indica]	XTH23_ARATH RecName: Full=Probable xyloglucan endotransglucosylase/hydrolase protein 23; Short=At-XTH23; Short=XTH-23; EC=2.4.1.207; Flags: Precursor;	A0A7N2R0A6_QUELO RecName: Full=Xyloglucan endotransglucosylase/hydrolase {ECO:0000256|RuleBase:RU361120}; EC=2.4.1.207 {ECO:0000256|RuleBase:RU361120};	--	GO:0048046,apoplast; GO:0005794,Golgi apparatus; GO:0004553,hydrolase activity, hydrolyzing O-glycosyl compounds; GO:0030247,polysaccharide binding; GO:0016762,xyloglucan:xyloglucosyl transferase activity; GO:0042546,cell wall biogenesis; GO:0071555,cell wall organization; GO:0010411,xyloglucan metabolic process; GO:0003674,molecular_function; GO:0003824,catalytic activity; GO:0016787,hydrolase a…	PF00722.24:Glycosyl hydrolases family 16	--	--	--
LOC123208595	306	131	297	8	9	10	5.2192	2.7556	4.5605	0.1344	0.1574	0.2047	4.17843333333333	0.1655	-4.65806	5.003797706899e-20	1.6998690883658e-17	NC_058137.1	3584654	3586716	+	LOC123208595	--	--	--	protein NUCLEAR FUSION DEFECTIVE 4-like [Mangifera indica]	NFD4_ARATH RecName: Full=Protein NUCLEAR FUSION DEFECTIVE 4 {ECO:0000303|PubMed:16698901};	A0A1Q3CLJ2_CEPFO SubName: Full=Nodulin-like domain-containing protein {ECO:0000313|EMBL:GAV81126.1};	--	GO:0016021,integral component of membrane; GO:0016020,membrane; GO:0005739,mitochondrion; GO:0000741,karyogamy; GO:0010197,polar nucleus fusion; GO:0009651,response to salt stress; GO:0006996,organelle organization; GO:0006997,nucleus organization; GO:0008150,biological_process; GO:0009987,cellular process; GO:0016043,cellular component organization; GO:0048284,organelle fusion; GO:0071840,cellul…	PF06813.16:Nodulin-like	--	--	--
LOC123195605	709	548	873	86	57	89	14.4706	13.7937	16.041	1.7294	1.1928	2.18	14.7684333333333	1.70073333333333	-3.11829	5.46390346217705e-20	1.83683912952958e-17	NC_058150.1	1041910	1048234	-	LOC123195605	--	--	--	uncharacterized protein LOC123195605 [Mangifera indica]	--	V4VPB2_CITCL SubName: Full=Uncharacterized protein {ECO:0000313|EMBL:ESR54744.1};	--	--	PF05623.15:Protein of unknown function (DUF789)	--	--	--
LOC123219994	67	24	116	2114	2043	1245	1.5239	0.6732	2.3753	47.3742	47.6432	33.9854	1.52413333333333	43.0009333333333	4.81830695132453	5.66563465220025e-20	1.88502089825215e-17	NC_058143.1	15214703	15218880	-	LOC123219994	--	K25784 bZIP transcription factor 9/10/25/63 | (RefSeq) light-inducible protein CPRF2-like (A)	--	light-inducible protein CPRF2-like [Mangifera indica]	CPRF2_PETCR RecName: Full=Light-inducible protein CPRF2; AltName: Full=Common plant regulatory factor 2; Short=CPRF-2;	V4T471_CITCL RecName: Full=BZIP domain-containing protein {ECO:0000259|PROSITE:PS50217};	--	GO:0005634,nucleus; GO:0003677,DNA binding; GO:0003700,DNA-binding transcription factor activity; GO:0003674,molecular_function; GO:0003676,nucleic acid binding; GO:0005488,binding; GO:0097159,organic cyclic compound binding; GO:1901363,heterocyclic compound binding; GO:0140110,transcription regulator activity; GO:0005575,cellular_component; GO:0005622,intracellular anatomical structure; GO:00432…	PF12498.11:Basic leucine-zipper C terminal	bZIP	TF	bZIP
LOC123221160	5499	8309	4234	460	354	336	112.169	209.024	77.7528	9.2448	7.4035	8.2255	132.982133333333	8.29126666666667	-4.0035	5.77967317945545e-20	1.90334074000577e-17	NC_058143.1	13478743	13484296	+	LOC123221160	--	K12890 serine/arginine-rich splicing factor 1 | (RefSeq) serine/arginine-rich splicing factor SR30-like (A)	ko03040: Spliceosome	serine/arginine-rich splicing factor SR30-like [Mangifera indica]	SR30_ARATH RecName: Full=Serine/arginine-rich splicing factor SR30; Short=At-SR30; Short=At-SRp30; Short=AtSR30; AltName: Full=SF2/ASF-like splicing modulator Srp30; AltName: Full=Serine-arginine rich RNA binding protein 30;	V4T5I8_CITCL SubName: Full=Uncharacterized protein {ECO:0000313|EMBL:ESR46665.1};	Alternative splicing factor ASF/SF2 (RRM superfamily)	GO:0005829,cytosol; GO:0016607,nuclear speck; GO:0005634,nucleus; GO:0005681,spliceosomal complex; GO:0003723,RNA binding; GO:0000398,mRNA splicing, via spliceosome; GO:0003674,molecular_function; GO:0003676,nucleic acid binding; GO:0005488,binding; GO:0097159,organic cyclic compound binding; GO:1901363,heterocyclic compound binding; GO:0000375,RNA splicing, via transesterification reactions; GO:…	PF00076.25:RNA recognition motif. (a.k.a. RRM, RBD, or RNP domain)	--	--	--
LOC123196378	73	64	59	1227	917	645	0.7173	0.7756	0.5219	11.8787	9.2382	7.6062	0.6716	9.57436666666667	3.83350292219008	5.95388464490551e-20	1.94090625399026e-17	NC_058150.1	3219438	3227621	+	LOC123196378	--	K00962 polyribonucleotide nucleotidyltransferase [EC:2.7.7.8] | (RefSeq) polyribonucleotide nucleotidyltransferase 2, mitochondrial isoform X1 (A)	ko03018: RNA degradation	polyribonucleotide nucleotidyltransferase 2, mitochondrial isoform X1 [Mangifera indica]	PNP2_ARATH RecName: Full=Polyribonucleotide nucleotidyltransferase 2, mitochondrial; Short=AtmtPNPase {ECO:0000303|PubMed:15037609}; EC=2.7.7.8 {ECO:0000269|PubMed:15037609, ECO:0000269|PubMed:16537927}; AltName: Full=Polynucleotide phosphorylase 2; Short=PNPase 2; Flags: Precursor;	A0A067EWB2_CITSI RecName: Full=Polyribonucleotide nucleotidyltransferase {ECO:0000256|ARBA:ARBA00012416}; EC=2.7.7.8 {ECO:0000256|ARBA:ARBA00012416};	Predicted RNA-binding polyribonucleotide nucleotidyltransferase	GO:0005829,cytosol; GO:0005739,mitochondrion; GO:0000175,3'-5'-exoribonuclease activity; GO:0004654,polyribonucleotide nucleotidyltransferase activity; GO:0003723,RNA binding; GO:0000958,mitochondrial mRNA catabolic process; GO:0000965,mitochondrial RNA 3'-end processing; GO:0000957,mitochondrial RNA catabolic process; GO:0000963,mitochondrial RNA processing; GO:0006397,mRNA processing; GO:000640…	PF01138.24:3' exoribonuclease family, domain 1	--	--	--
LOC123220215	28	37	29	549	529	461	0.466	0.7595	0.4346	9.0032	9.0276	9.2089	0.553366666666667	9.0799	4.03636876114358	6.09705572101629e-20	1.96770279284359e-17	NC_058143.1	2063542	2068610	-	LOC123220215	--	--	--	uncharacterized protein LOC123220215 [Mangifera indica]	--	V4TWA5_CITCL SubName: Full=Uncharacterized protein {ECO:0000313|EMBL:ESR56020.1};	--	--	--	--	--	--
LOC123226683	1568	1443	2208	16682	26504	21750	70.9161	80.4867	89.9029	743.355	1229.01	1180.57	80.4352333333333	1050.97843333333	3.70776166573972	7.57179408644744e-20	2.41945059952394e-17	NC_058146.1	2444530	2445570	+	LOC123226683	--	K13195 cold-inducible RNA-binding protein | (RefSeq) glycine-rich RNA-binding protein GRP2A-like (A)	--	glycine-rich RNA-binding protein-like [Mangifera indica]	GRP1_SINAL RecName: Full=Glycine-rich RNA-binding protein GRP1A;	A0A2P2JD12_RHIMU RecName: Full=RRM domain-containing protein {ECO:0000259|PROSITE:PS50102};	FOG: RRM domain	GO:0005634,nucleus; GO:0003723,RNA binding; GO:0003674,molecular_function; GO:0003676,nucleic acid binding; GO:0005488,binding; GO:0097159,organic cyclic compound binding; GO:1901363,heterocyclic compound binding; GO:0005575,cellular_component; GO:0005622,intracellular anatomical structure; GO:0043226,organelle; GO:0043227,membrane-bounded organelle; GO:0043229,intracellular organelle; GO:0043231…	PF00076.25:RNA recognition motif. (a.k.a. RRM, RBD, or RNP domain)	--	--	--
LOC123211455	1816	1570	1765	24798	17812	11851	22.7804	24.2887	19.9327	306.486	229.088	178.417	22.3339333333333	237.997066666667	3.41363453389579	8.43261744846743e-20	2.66809669523911e-17	NC_058139.1	11553916	11558699	-	LOC123211455	--	K12127 pseudo-response regulator 1 | (RefSeq) two-component response regulator-like APRR1 (A)	ko04712: Circadian rhythm - plant	two-component response regulator-like APRR1 [Mangifera indica]	APRR1_ARATH RecName: Full=Two-component response regulator-like APRR1; AltName: Full=ABI3-interacting protein 1; AltName: Full=Pseudo-response regulator 1; AltName: Full=Timing of CAB expression 1;	V4T158_CITCL SubName: Full=Uncharacterized protein {ECO:0000313|EMBL:ESR53898.1};	GATA-4/5/6 transcription factors	GO:0005634,nucleus; GO:0003677,DNA binding; GO:0003700,DNA-binding transcription factor activity; GO:0007623,circadian rhythm; GO:0010031,circumnutation; GO:0009736,cytokinin-activated signaling pathway; GO:0009908,flower development; GO:0010629,negative regulation of gene expression; GO:0000160,phosphorelay signal transduction system; GO:0010468,regulation of gene expression; GO:0006355,regulati…	PF00072.27:Response regulator receiver domain	Pseudo ARR-B	TR	Pseudo ARR-B
LOC123212107	2133	1373	2155	391	327	263	79.5899	63.1824	72.3919	14.3745	12.51	11.7776	71.7214	12.8873666666667	-2.47645	9.66888020389992e-20	3.0295511730142e-17	NC_058139.1	2018798	2019811	+	LOC123212107	--	--	--	uncharacterized protein LOC123212107 [Mangifera indica]	--	A0A2H5NFY7_CITUN SubName: Full=Uncharacterized protein {ECO:0000313|EMBL:GAY39012.1};	--	GO:0016021,integral component of membrane; GO:0005575,cellular_component; GO:0016020,membrane; GO:0031224,intrinsic component of membrane; GO:0110165,cellular anatomical entity	PF06549.15:Protein of unknown function (DUF1118)	--	--	--
LOC123229311	822	716	986	182	167	132	16.3041	17.5145	17.6067	3.5567	3.3961	3.1422	17.1417666666667	3.365	-2.34884	1.03389104023823e-19	3.20834284053926e-17	NC_058147.1	2484807	2488133	-	LOC123229311	--	K23136 fraxetin 5-hydroxylase [EC:1.14.14.164] | (RefSeq) xanthotoxin 5-hydroxylase CYP82C4-like (A)	ko00999: Biosynthesis of various plant secondary metabolites; ko01110: Biosynthesis of secondary metabolites	cytochrome P450 CYP82D47-like [Mangifera indica]	C82A3_SOYBN RecName: Full=Cytochrome P450 82A3; EC=1.14.-.-; AltName: Full=Cytochrome P450 CP6;	A0A5C7H5J9_9ROSI SubName: Full=Uncharacterized protein {ECO:0000313|EMBL:TXG52308.1};	Cytochrome P450 CYP2 subfamily	GO:0016020,membrane; GO:0020037,heme binding; GO:0005506,iron ion binding; GO:0004497,monooxygenase activity; GO:0016705,oxidoreductase activity, acting on paired donors, with incorporation or reduction of molecular oxygen; GO:0098542,defense response to other organism; GO:0003674,molecular_function; GO:0005488,binding; GO:0046906,tetrapyrrole binding; GO:0097159,organic cyclic compound binding; …	PF00067.25:Cytochrome P450	--	--	--
LOC123212128	157	232	259	14	14	11	6.9751	12.7116	10.3593	0.6128	0.6377	0.5865	10.0153333333333	0.612333333333333	-4.03175	1.72448440551936e-19	5.30040811612632e-17	NC_058139.1	1320337	1321589	+	LOC123212128	--	--	--	hypothetical protein JRO89_XS13G0158500 [Xanthoceras sorbifolium]	--	A0A067G9P5_CITSI SubName: Full=Uncharacterized protein {ECO:0000313|EMBL:KDO76314.1};	--	--	--	--	--	--
LOC123216149	5093	3435	4798	533	674	562	334.339	278.099	283.563	34.4739	45.3647	44.2776	298.667	41.3720666666667	-2.85181	1.80083364077513e-19	5.48285887629582e-17	NC_058141.1	13121418	13121953	+	LOC123216149	--	--	--	photosystem II 5 kDa protein, chloroplastic [Mangifera indica]	PST2_GOSHI RecName: Full=Photosystem II 5 kDa protein, chloroplastic; Short=PSII-T; AltName: Full=Light-regulated unknown 11 kDa protein; Flags: Precursor;	A0A151TLK4_CAJCA SubName: Full=Uncharacterized protein {ECO:0000313|EMBL:KYP67934.1};	--	GO:0009535,chloroplast thylakoid membrane; GO:0009523,photosystem II; GO:0015979,photosynthesis; GO:0008150,biological_process; GO:0008152,metabolic process; GO:0009987,cellular process; GO:0044237,cellular metabolic process; GO:0005575,cellular_component; GO:0005622,intracellular anatomical structure; GO:0005737,cytoplasm; GO:0009507,chloroplast; GO:0009526,plastid envelope; GO:0009534,chloropla…	--	--	--	--
LOC123209602	1187	1496	1351	188	179	113	25.7819	40.0732	26.4177	4.0232	3.9862	2.9456	30.7576	3.65166666666667	-3.07432	1.90037115949922e-19	5.73183910565592e-17	NC_058138.1	15584231	15592179	+	LOC123209602	--	--	--	metal tolerance protein 4-like [Mangifera indica]	MTP4_ORYSJ RecName: Full=Metal tolerance protein 4; Short=OsMTP4;	A0A067FIA6_CITSI RecName: Full=ZT_dimer domain-containing protein {ECO:0000259|Pfam:PF16916};	Mitochondrial Fe2+ transporter MMT1 and related transporters (cation diffusion facilitator superfamily)	GO:0016021,integral component of membrane; GO:0016020,membrane; GO:0005774,vacuolar membrane; GO:0008324,cation transmembrane transporter activity; GO:0005384,manganese ion transmembrane transporter activity; GO:0003674,molecular_function; GO:0005215,transporter activity; GO:0015075,ion transmembrane transporter activity; GO:0022857,transmembrane transporter activity; GO:0015318,inorganic molecul…	PF01545.24:Cation efflux family	--	--	--
LOC123194878	1323	940	4929	67	75	25	39.6863	34.775	133.111	1.9802	2.3067	0.9	69.1909	1.72896666666667	-5.3226	2.67841723230555e-19	8.00375549427749e-17	NC_058149.1	3451087	3452447	-	LOC123194878	--	K14504 xyloglucan:xyloglucosyl transferase TCH4 [EC:2.4.1.207] | (RefSeq) probable xyloglucan endotransglucosylase/hydrolase protein 23 (A)	ko04075: Plant hormone signal transduction	probable xyloglucan endotransglucosylase/hydrolase protein 23 [Mangifera indica]	XTH23_ARATH RecName: Full=Probable xyloglucan endotransglucosylase/hydrolase protein 23; Short=At-XTH23; Short=XTH-23; EC=2.4.1.207; Flags: Precursor;	A0A7N2R0A6_QUELO RecName: Full=Xyloglucan endotransglucosylase/hydrolase {ECO:0000256|RuleBase:RU361120}; EC=2.4.1.207 {ECO:0000256|RuleBase:RU361120};	--	GO:0048046,apoplast; GO:0005794,Golgi apparatus; GO:0004553,hydrolase activity, hydrolyzing O-glycosyl compounds; GO:0030247,polysaccharide binding; GO:0016762,xyloglucan:xyloglucosyl transferase activity; GO:0042546,cell wall biogenesis; GO:0071555,cell wall organization; GO:0010411,xyloglucan metabolic process; GO:0003674,molecular_function; GO:0003824,catalytic activity; GO:0016787,hydrolase a…	PF00722.24:Glycosyl hydrolases family 16	--	--	--
LOC123206343	19	30	26	466	683	458	0.5734	1.1165	0.7064	13.8553	21.1322	16.5875	0.798766666666667	17.1916666666667	4.42779147623685	2.74668219018036e-19	8.13244718565971e-17	NW_025401125.1	179838	181389	+	LOC123206343	--	--	--	acid phosphatase 1-like isoform X2 [Mangifera indica]	PPA1_SOLLC RecName: Full=Acid phosphatase 1; EC=3.1.3.2; AltName: Full=Apase-1(1); Flags: Precursor;	A0A061E8U0_THECC SubName: Full=Stem 28 kDa glycoprotein, putative {ECO:0000313|EMBL:EOY01381.1};	--	GO:0003993,acid phosphatase activity; GO:0003674,molecular_function; GO:0003824,catalytic activity; GO:0016787,hydrolase activity; GO:0016788,hydrolase activity, acting on ester bonds; GO:0016791,phosphatase activity; GO:0042578,phosphoric ester hydrolase activity	PF03767.17:HAD superfamily, subfamily IIIB (Acid phosphatase)	--	--	--
LOC123192364	71	53	67	820	631	497	1.8812	1.7319	1.5982	21.4064	17.1417	15.8042	1.7371	18.1174333333333	3.38262587217213	2.92851127880713e-19	8.59198586372205e-17	NC_058148.1	12739363	12744177	+	LOC123192364	--	K04125 gibberellin 2beta-dioxygenase [EC:1.14.11.13] | (RefSeq) gibberellin 2-beta-dioxygenase 8 (A)	ko00904: Diterpenoid biosynthesis; ko01110: Biosynthesis of secondary metabolites	gibberellin 2-beta-dioxygenase 8 [Mangifera indica]	G2OX8_ARATH RecName: Full=Gibberellin 2-beta-dioxygenase 8; EC=1.14.11.13; AltName: Full=GA 2-oxidase 8; AltName: Full=Gibberellin 2-beta-hydroxylase 8; AltName: Full=Gibberellin 2-oxidase 8;	A0A067GJQ7_CITSI RecName: Full=Fe2OG dioxygenase domain-containing protein {ECO:0000259|PROSITE:PS51471};	Iron/ascorbate family oxidoreductases	GO:0005737,cytoplasm; GO:0005634,nucleus; GO:0052635,C-20 gibberellin 2-beta-dioxygenase activity; GO:0051213,dioxygenase activity; GO:0046872,metal ion binding; GO:0010336,gibberellic acid homeostasis; GO:0009686,gibberellin biosynthetic process; GO:0045487,gibberellin catabolic process; GO:0009685,gibberellin metabolic process; GO:0003674,molecular_function; GO:0003824,catalytic activity; GO:00…	PF03171.23:2OG-Fe(II) oxygenase superfamily	--	--	--
LOC123199708	79	139	107	1885	1803	1719	1.2437	2.6988	1.5166	29.2389	29.1032	32.4796	1.8197	30.2739	4.05630201159026	3.08371903755636e-19	8.96584364856365e-17	NC_058152.1	1512513	1517531	+	LOC123199708	--	K17681 ATPase family AAA domain-containing protein 3A/B | (RefSeq) ATPase family AAA domain-containing protein 3C isoform X1 (A)	--	ATPase family AAA domain-containing protein 3C isoform X1 [Mangifera indica]	CD48D_ARATH RecName: Full=Cell division control protein 48 homolog D; Short=AtCDC48d; AltName: Full=Transitional endoplasmic reticulum ATPase D;	V4SEA8_CITCL RecName: Full=AAA domain-containing protein {ECO:0000259|SMART:SM00382};	AAA+-type ATPase	GO:0005856,cytoskeleton; GO:0005829,cytosol; GO:0005794,Golgi apparatus; GO:0005730,nucleolus; GO:0005654,nucleoplasm; GO:0005634,nucleus; GO:0009524,phragmoplast; GO:0034098,VCP-NPL4-UFD1 AAA ATPase complex; GO:0005524,ATP binding; GO:0016887,ATP hydrolysis activity; GO:0031593,polyubiquitin modification-dependent protein binding; GO:0097352,autophagosome maturation; GO:0051301,cell division; GO…	PF12037.11:ATPase family AAA domain-containing protein 3, N-terminal	--	--	--
LOC123193905	28028	32883	24740	2783	3514	2209	544.568	787.935	432.748	53.2749	70.0013	51.5098	588.417	58.262	-3.33621	3.54692196380961e-19	1.02205189766096e-16	NC_058149.1	384658	387263	+	LOC123193905	--	K00131 glyceraldehyde-3-phosphate dehydrogenase (NADP+) [EC:1.2.1.9] | (RefSeq) NADP-dependent glyceraldehyde-3-phosphate dehydrogenase (A)	ko00010: Glycolysis / Gluconeogenesis; ko00030: Pentose phosphate pathway; ko01100: Metabolic pathways; ko01200: Carbon metabolism	NADP-dependent glyceraldehyde-3-phosphate dehydrogenase [Mangifera indica]	GAPN_NICPL RecName: Full=NADP-dependent glyceraldehyde-3-phosphate dehydrogenase; EC=1.2.1.9; AltName: Full=Glyceraldehyde-3-phosphate dehydrogenase [NADP(+)]; AltName: Full=Non-phosphorylating glyceraldehyde 3-phosphate dehydrogenase; AltName: Full=Triosephosphate dehydrogenase;	A0A5B7AI50_DAVIN SubName: Full=Putative NADP-dependent glyceraldehyde-3-phosphate dehydrogenase isoform X1 {ECO:0000313|EMBL:MPA56400.1}; EC=1.2.1.9 {ECO:0000313|EMBL:MPA56400.1}; Flags: Fragment;	Aldehyde dehydrogenase	GO:0005737,cytoplasm; GO:0008886,glyceraldehyde-3-phosphate dehydrogenase (NADP+) (non-phosphorylating) activity; GO:0003674,molecular_function; GO:0003824,catalytic activity; GO:0016491,oxidoreductase activity; GO:0016620,oxidoreductase activity, acting on the aldehyde or oxo group of donors, NAD or NADP as acceptor; GO:0016903,oxidoreductase activity, acting on the aldehyde or oxo group of dono…	PF00171.25:Aldehyde dehydrogenase family	--	--	--
LOC123211246	134	190	179	4810	2981	1702	2.0662	3.6131	2.4848	73.073	47.1269	31.4961	2.72136666666667	50.5653333333333	4.21574538043253	4.0629085118039e-19	1.16037386195971e-16	NC_058139.1	3545095	3551379	+	LOC123211246	--	--	--	protein PLASTID TRANSCRIPTIONALLY ACTIVE 10 [Mangifera indica]	PTA10_ARATH RecName: Full=Protein PLASTID TRANSCRIPTIONALLY ACTIVE 10 {ECO:0000303|PubMed:16326926}; Short=pTAC10 {ECO:0000303|PubMed:16326926}; AltName: Full=Plastid-encoded RNA polymerase-associated protein 3 {ECO:0000303|PubMed:21949211}; Short=PEP-associated protein 3 {ECO:0000303|PubMed:21949211}; AltName: Full=Protein PIGMENT DEFECTIVE 312; Flags: Precursor;	A0A5C7H502_9ROSI RecName: Full=S1 motif domain-containing protein {ECO:0000259|PROSITE:PS50126};	--	GO:0009507,chloroplast; GO:0042644,chloroplast nucleoid; GO:0009570,chloroplast stroma; GO:0000427,plastid-encoded plastid RNA polymerase complex; GO:0003723,RNA binding; GO:0003674,molecular_function; GO:0003676,nucleic acid binding; GO:0005488,binding; GO:0097159,organic cyclic compound binding; GO:1901363,heterocyclic compound binding; GO:0005575,cellular_component; GO:0005622,intracellular an…	--	--	--	--
LOC123196638	10	7	7	232	271	313	0.0956	0.0826	0.0603	2.1862	2.6574	3.5928	0.0795	2.81213333333333	5.14456632875919	4.62111239181266e-19	1.30822070369272e-16	NC_058150.1	4064737	4069640	-	LOC123196638	--	K05016 chloride channel 7 | (RefSeq) chloride channel protein CLC-c-like isoform X1 (A)	--	LOW QUALITY PROTEIN: chloride channel protein CLC-a-like [Mangifera indica]	CLCA_ARATH RecName: Full=Chloride channel protein CLC-a; Short=AtCLC-a; AltName: Full=CBS domain-containing protein CBSCLC5;	V4W2Z9_CITCL RecName: Full=Chloride channel protein {ECO:0000256|RuleBase:RU361221};	Cl- channel CLC-7 and related proteins (CLC superfamily)	GO:0034707,chloride channel complex; GO:0043231,intracellular membrane-bounded organelle; GO:0009705,plant-type vacuole membrane; GO:0015112,nitrate transmembrane transporter activity; GO:0009671,nitrate:proton symporter activity; GO:0005247,voltage-gated chloride channel activity; GO:0006821,chloride transport; GO:0015706,nitrate transmembrane transport; GO:0034765,regulation of ion transmembran…	PF00654.23:Voltage gated chloride channel	--	--	--
novel.1605	721	312	1066	39	52	33	50.8409	27.1326	67.6723	2.7095	3.7595	2.7927	48.5486	3.08723333333333	-3.97504	5.09142900471088e-19	1.42883207190465e-16	NW_025401122.1	22858	23447	+	--	--	--	--	uncharacterized protein LOC116120182 [Pistacia vera]	--	A0A067FA82_CITSI SubName: Full=Uncharacterized protein {ECO:0000313|EMBL:KDO64218.1};	--	--	--	--	--	--
LOC123198644	137	167	184	3833	2950	1375	3.3924	5.0999	4.1018	93.5131	74.8947	40.8622	4.19803333333333	69.7566666666667	4.05454557523873	5.43163849421481e-19	1.51116611313616e-16	NC_058152.1	9514066	9517972	-	LOC123198644	--	K09903 uridylate kinase [EC:2.7.4.22] | (RefSeq) uridylate kinase (A)	ko00240: Pyrimidine metabolism; ko01100: Metabolic pathways; ko01232: Nucleotide metabolism; ko01240: Biosynthesis of cofactors	uridylate kinase [Mangifera indica]	PUMPK_ARATH RecName: Full=Uridylate kinase PUMPKIN, chloroplastic {ECO:0000305|PubMed:30409856}; EC=2.7.4.22 {ECO:0000269|PubMed:30409856}; AltName: Full=Plastid UMP kinase {ECO:0000303|PubMed:30409856}; AltName: Full=Protein DEFECT IN PSAA/B TRANSCRIPT ACCUMULATION 1 {ECO:0000303|PubMed:19037728}; AltName: Full=Uridine monophosphate kinase {ECO:0000250|UniProtKB:P0A7E9}; Short=UMP kinase {ECO:00…	A0A067F4E7_CITSI RecName: Full=UMP kinase {ECO:0000256|ARBA:ARBA00012899}; EC=2.7.4.22 {ECO:0000256|ARBA:ARBA00012899}; AltName: Full=Uridine monophosphate kinase {ECO:0000256|ARBA:ARBA00032092};	--	GO:0009507,chloroplast; GO:0009570,chloroplast stroma; GO:0005524,ATP binding; GO:0043621,protein self-association; GO:0003723,RNA binding; GO:1990825,sequence-specific mRNA binding; GO:0033862,UMP kinase activity; GO:0044210,'de novo' CTP biosynthetic process; GO:0009658,chloroplast organization; GO:0031425,chloroplast RNA processing; GO:0016310,phosphorylation; GO:0042548,regulation of photosyn…	PF00696.31:Amino acid kinase family	--	--	--
LOC123223477	557	134	390	6	8	8	34.6885	10.2919	21.8661	0.3682	0.5108	0.5979	22.2821666666667	0.4923	-5.50021	5.78825901202365e-19	1.59661951363281e-16	NC_058144.1	7446264	7446828	+	LOC123223477	--	K08902 photosystem II Psb27 protein | (RefSeq) photosystem II repair protein PSB27-H1, chloroplastic (A)	ko00195: Photosynthesis; ko01100: Metabolic pathways	photosystem II repair protein PSB27-H1, chloroplastic, partial [Mangifera indica]	PB27A_ARATH RecName: Full=Photosystem II repair protein PSB27-H1, chloroplastic; Short=Psb27-H1; AltName: Full=Thylakoid lumenal protein PSB27-H1; Flags: Precursor;	A0A4U5R708_POPAL SubName: Full=Photosystem 2 family protein {ECO:0000313|EMBL:TKS18055.1};	--	GO:0009507,chloroplast; GO:0009534,chloroplast thylakoid; GO:0009543,chloroplast thylakoid lumen; GO:0009535,chloroplast thylakoid membrane; GO:0005576,extracellular region; GO:0009523,photosystem II; GO:0009579,thylakoid; GO:0071484,cellular response to light intensity; GO:0010207,photosystem II assembly; GO:0010206,photosystem II repair; GO:0008150,biological_process; GO:0009314,response to rad…	PF13326.9:Photosystem II Pbs27	--	--	--
LOC123225862	43	24	20	684	628	664	1.4301	0.9844	0.5988	22.4129	21.414	26.503	1.00443333333333	23.4433	4.54472194805424	1.04448394815624e-18	2.85666359820731e-16	NC_058145.1	3993560	3994617	-	LOC123225862	--	K09286 EREBP-like factor | (RefSeq) ethylene-responsive transcription factor ERF104-like (A)	--	ethylene-responsive transcription factor ERF106-like [Mangifera indica]	EF106_ARATH RecName: Full=Ethylene-responsive transcription factor ERF106;	A0A067DAI6_CITSI RecName: Full=AP2/ERF domain-containing protein {ECO:0000259|PROSITE:PS51032};	--	GO:0005634,nucleus; GO:0003677,DNA binding; GO:0003700,DNA-binding transcription factor activity; GO:0009873,ethylene-activated signaling pathway; GO:0003674,molecular_function; GO:0003676,nucleic acid binding; GO:0005488,binding; GO:0097159,organic cyclic compound binding; GO:1901363,heterocyclic compound binding; GO:0140110,transcription regulator activity; GO:0000160,phosphorelay signal transd…	PF00847.23:AP2 domain	AP2/ERF-ERF	TF	AP2/ERF->AP2/ERF-ERF
LOC123212697	10947	13609	10290	1104	1009	393	354.36	543.293	299.875	35.2101	33.4876	15.2678	399.176	27.9885	-3.83412	1.12707194440219e-18	3.05663805560436e-16	NC_058140.1	19649549	19650741	-	LOC123212697	--	K13993 HSP20 family protein | (RefSeq) small heat shock protein, chloroplastic-like (A)	ko04141: Protein processing in endoplasmic reticulum	small heat shock protein, chloroplastic-like [Mangifera indica]	HS22C_SOYBN RecName: Full=Small heat shock protein, chloroplastic; Flags: Fragment;	A0A2P5B0P3_PARAD SubName: Full=Small heat shock protein HSP {ECO:0000313|EMBL:PON42354.1};	Molecular chaperone (small heat-shock protein Hsp26/Hsp42)	GO:0009507,chloroplast; GO:0009408,response to heat; GO:0006950,response to stress; GO:0008150,biological_process; GO:0009266,response to temperature stimulus; GO:0009628,response to abiotic stimulus; GO:0050896,response to stimulus; GO:0005575,cellular_component; GO:0005622,intracellular anatomical structure; GO:0005737,cytoplasm; GO:0009536,plastid; GO:0043226,organelle; GO:0043227,membrane-bou…	PF00011.24:Hsp20/alpha crystallin family	--	--	--
LOC123200191	3361	879	3099	171	83	73	102.569	33.0824	85.1425	5.1416	2.597	2.6737	73.5981	3.47076666666667	-4.40634	1.27498088032745e-18	3.42895482923398e-16	NC_058153.1	2699029	2700903	-	LOC123200191	--	--	--	strigolactone esterase D14-like [Mangifera indica]	D14_ARATH RecName: Full=Strigolactone esterase D14 {ECO:0000303|PubMed:25425668}; EC=3.1.-.- {ECO:0000269|PubMed:25425668}; AltName: Full=Protein DWARF 14 {ECO:0000303|PubMed:22357928}; Short=AtD14 {ECO:0000303|PubMed:22357928};	A0A5C7HX12_9ROSI RecName: Full=AB hydrolase-1 domain-containing protein {ECO:0000259|Pfam:PF12697};	--	GO:0005737,cytoplasm; GO:0005634,nucleus; GO:0016787,hydrolase activity; GO:1902348,cellular response to strigolactone; GO:0010223,secondary shoot formation; GO:1901601,strigolactone biosynthetic process; GO:0003674,molecular_function; GO:0003824,catalytic activity; GO:0008150,biological_process; GO:0009987,cellular process; GO:0010033,response to organic substance; GO:0014070,response to organic…	PF00561.23:alpha/beta hydrolase fold	--	--	--
LOC123215562	5752	2718	7213	264	222	419	145.607	84.854	164.382	6.5844	5.7618	12.7295	131.614566666667	8.35856666666667	-3.97692	1.35760134424479e-18	3.62098084155471e-16	NC_058141.1	18852007	18853527	-	LOC123215562	--	--	--	NDR1/HIN1-like protein 13 [Mangifera indica]	--	V4VXM8_CITCL SubName: Full=Uncharacterized protein {ECO:0000313|EMBL:ESR58134.1};	--	GO:0016021,integral component of membrane; GO:0005575,cellular_component; GO:0016020,membrane; GO:0031224,intrinsic component of membrane; GO:0110165,cellular anatomical entity	PF03168.16:Late embryogenesis abundant protein	--	--	--
LOC123200198	12	11	35	885	1088	331	0.1592	0.1799	0.4179	11.5647	14.795	5.2687	0.252333333333333	10.5428	5.38478346500644	1.54763861436612e-18	4.0940115574949e-16	NC_058153.1	12920488	12925059	+	LOC123200198	--	K01285 lysosomal Pro-X carboxypeptidase [EC:3.4.16.2] | (RefSeq) lysosomal Pro-X carboxypeptidase isoform X1 (A)	--	lysosomal Pro-X carboxypeptidase isoform X1 [Mangifera indica]	EDA2_ARATH RecName: Full=Probable serine protease EDA2; EC=3.4.-.-; AltName: Full=Protein EMBRYO SAC DEVELOPMENT ARREST 2; Flags: Precursor;	A9PH71_POPTR SubName: Full=Uncharacterized protein {ECO:0000313|EMBL:ABK95724.1};	Prolylcarboxypeptidase (angiotensinase C)	GO:0005576,extracellular region; GO:0008239,dipeptidyl-peptidase activity; GO:0008236,serine-type peptidase activity; GO:0009561,megagametogenesis; GO:0006508,proteolysis; GO:0003674,molecular_function; GO:0003824,catalytic activity; GO:0008233,peptidase activity; GO:0008238,exopeptidase activity; GO:0016787,hydrolase activity; GO:0140096,catalytic activity, acting on a protein; GO:0017171,serine…	PF05577.15:Serine carboxypeptidase S28	--	--	--
LOC123204649	118	83	136	984	1181	939	2.0078	1.7417	2.0833	16.4958	20.6026	19.1747	1.94426666666667	18.7577	3.27018492971364	1.84115678785978e-18	4.81062143875566e-16	NC_058138.1	20140321	20143441	-	LOC123204649	--	--	--	cyclic dof factor 3-like [Mangifera indica]	CDF2_ARATH RecName: Full=Cyclic dof factor 2; AltName: Full=Dof zinc finger protein DOF5.2; Short=AtDOF5.2;	A0A067FF98_CITSI RecName: Full=Dof-type domain-containing protein {ECO:0000259|PROSITE:PS50884};	--	GO:0005634,nucleus; GO:0003677,DNA binding; GO:0003700,DNA-binding transcription factor activity; GO:0046872,metal ion binding; GO:0000976,transcription cis-regulatory region binding; GO:0009908,flower development; GO:0006355,regulation of DNA-templated transcription; GO:0003674,molecular_function; GO:0003676,nucleic acid binding; GO:0005488,binding; GO:0097159,organic cyclic compound binding; GO…	PF02701.18:Dof domain, zinc finger	C2C2-Dof	TF	C2C2->C2C2-Dof
LOC123229744	5	7	10	367	166	226	0.0822	0.1419	0.148	5.9454	2.7984	4.4597	0.124033333333333	4.40116666666667	5.14908621096516	1.84834709635206e-18	4.81062143875566e-16	NC_058147.1	6017710	6023401	-	LOC123229744	--	K09580 protein disulfide-isomerase A1 [EC:5.3.4.1] | (RefSeq) protein disulfide-isomerase-like (A)	ko04141: Protein processing in endoplasmic reticulum	protein disulfide-isomerase-like [Mangifera indica]	PDI_MEDSA RecName: Full=Protein disulfide-isomerase; Short=PDI; EC=5.3.4.1; Flags: Precursor;	A0A2H5NQ44_CITUN RecName: Full=Protein disulfide-isomerase {ECO:0000256|ARBA:ARBA00012723, ECO:0000256|RuleBase:RU361130}; EC=5.3.4.1 {ECO:0000256|ARBA:ARBA00012723, ECO:0000256|RuleBase:RU361130};	Protein disulfide isomerase (prolyl 4-hydroxylase beta subunit)	GO:0005788,endoplasmic reticulum lumen; GO:0003756,protein disulfide isomerase activity; GO:0003674,molecular_function; GO:0003824,catalytic activity; GO:0016853,isomerase activity; GO:0016860,intramolecular oxidoreductase activity; GO:0016864,intramolecular oxidoreductase activity, transposing S-S bonds; GO:0140096,catalytic activity, acting on a protein; GO:0005575,cellular_component; GO:000562…	PF00085.23:Thioredoxin	--	--	--
LOC123211921	3174	3515	5068	945	589	514	35.6586	48.7014	51.2589	10.4601	6.7845	6.9303	45.2063	8.0583	-2.48798	2.30099872957612e-18	5.94081055996881e-16	NC_058139.1	22113732	22117491	-	LOC123211921	--	K08867 WNK lysine deficient protein kinase [EC:2.7.11.1] | (RefSeq) probable serine/threonine-protein kinase WNK9 (A)	--	probable serine/threonine-protein kinase WNK9 [Mangifera indica]	WNK1_ARATH RecName: Full=Serine/threonine-protein kinase WNK1; Short=AtWNK1; EC=2.7.11.1; AltName: Full=Protein kinase with no lysine 1;	V4S332_CITCL RecName: Full=Non-specific serine/threonine protein kinase {ECO:0000256|ARBA:ARBA00012513}; EC=2.7.11.1 {ECO:0000256|ARBA:ARBA00012513};	Serine/threonine protein kinase	GO:0005737,cytoplasm; GO:0005524,ATP binding; GO:0004672,protein kinase activity; GO:0106310,protein serine kinase activity; GO:0004674,protein serine/threonine kinase activity; GO:0007623,circadian rhythm; GO:0035556,intracellular signal transduction; GO:0006468,protein phosphorylation; GO:0000166,nucleotide binding; GO:0003674,molecular_function; GO:0005488,binding; GO:0017076,purine nucleotide…	PF00069.28:Protein kinase domain	--	--	--
LOC123203974	263	294	234	22	15	19	4.6132	6.36	3.6952	0.3802	0.2698	0.4	4.88946666666667	0.35	-3.80425	2.36549046313575e-18	6.05884712037938e-16	NC_058156.1	10254183	10257000	-	LOC123203974	--	K12200 programmed cell death 6-interacting protein | (RefSeq) vacuolar-sorting protein BRO1-like (A)	ko03250: Viral life cycle - HIV-1; ko04144: Endocytosis	vacuolar-sorting protein BRO1-like isoform X1 [Mangifera indica]	BRO1_ARATH RecName: Full=Vacuolar-sorting protein BRO1 {ECO:0000305}; AltName: Full=BRO domain-containing protein 1 {ECO:0000305}; Short=AtBRO1 {ECO:0000303|PubMed:26902184};	A0A314UAI3_PRUYE SubName: Full=ALG-2 interacting protein X {ECO:0000313|EMBL:PQM34300.1};	Predicted signal transduction protein	GO:0005737,cytoplasm; GO:0005829,cytosol; GO:0005768,endosome; GO:0005770,late endosome; GO:0005771,multivesicular body; GO:0009506,plasmodesma; GO:0043621,protein self-association; GO:0043130,ubiquitin binding; GO:0099638,endosome to plasma membrane protein transport; GO:0036257,multivesicular body organization; GO:0043328,protein transport to vacuole involved in ubiquitin-dependent protein cata…	PF03097.21:BRO1-like domain	--	--	--
LOC123228647	71	54	129	1396	1307	683	1.0401	0.9756	1.7013	20.1484	19.6302	12.0077	1.239	17.2621	3.80035989193114	2.61886569357501e-18	6.6550120101375e-16	NC_058147.1	2892147	2896661	-	LOC123228647	--	--	--	protein CYPRO4 [Mangifera indica]	CYPR4_CYNCA RecName: Full=Protein CYPRO4;	V4T933_CITCL RecName: Full=VID27 domain-containing protein {ECO:0000259|Pfam:PF08553};	Protein involved in vacuole import and degradation	GO:0005737,cytoplasm; GO:0005635,nuclear envelope; GO:0005575,cellular_component; GO:0005622,intracellular anatomical structure; GO:0110165,cellular anatomical entity; GO:0005634,nucleus; GO:0012505,endomembrane system; GO:0031967,organelle envelope; GO:0031975,envelope; GO:0043226,organelle; GO:0043227,membrane-bounded organelle; GO:0043229,intracellular organelle; GO:0043231,intracellular membr…	PF08553.13:VID27 C-terminal WD40-like domain	--	--	--
LOC123225395	3075	508	3251	23	49	48	124.224	25.3095	118.237	0.9155	2.0296	2.3272	89.2568	1.75743333333333	-5.66642	2.67484923719441e-18	6.74417261187307e-16	NC_058145.1	14003154	14006303	-	LOC123225395	--	K09873 aquaporin TIP | (RefSeq) aquaporin TIP1-1-like (A)	--	aquaporin TIP1-1-like [Mangifera indica]	TIP12_MUSAC RecName: Full=Aquaporin TIP1-2 {ECO:0000303|PubMed:26307965, ECO:0000303|PubMed:29778840}; AltName: Full=Tonoplast intrinsic protein 1-2 {ECO:0000303|PubMed:26307965, ECO:0000303|PubMed:29778840}; Short=MaTIP1-2 {ECO:0000303|PubMed:26307965}; Short=MaTIP1;2 {ECO:0000303|PubMed:26307965, ECO:0000303|PubMed:29778840};	F6GW83_VITVI SubName: Full=Uncharacterized protein {ECO:0000313|EMBL:CCB44218.1};	Aquaporin (major intrinsic protein family)	--	PF00230.23:Major intrinsic protein	--	--	--
LOC123193935	413	188	585	16	28	15	12.8489	7.2133	16.385	0.4904	0.8931	0.5601	12.1490666666667	0.647866666666667	-4.229	4.23885722528846e-18	1.06047007156383e-15	NC_058149.1	3264619	3265917	+	LOC123193935	--	K14504 xyloglucan:xyloglucosyl transferase TCH4 [EC:2.4.1.207] | (RefSeq) probable xyloglucan endotransglucosylase/hydrolase protein 23 (A)	ko04075: Plant hormone signal transduction	probable xyloglucan endotransglucosylase/hydrolase protein 23 [Mangifera indica]	XTH23_ARATH RecName: Full=Probable xyloglucan endotransglucosylase/hydrolase protein 23; Short=At-XTH23; Short=XTH-23; EC=2.4.1.207; Flags: Precursor;	A0A7N2R0A6_QUELO RecName: Full=Xyloglucan endotransglucosylase/hydrolase {ECO:0000256|RuleBase:RU361120}; EC=2.4.1.207 {ECO:0000256|RuleBase:RU361120};	--	GO:0048046,apoplast; GO:0005794,Golgi apparatus; GO:0004553,hydrolase activity, hydrolyzing O-glycosyl compounds; GO:0030247,polysaccharide binding; GO:0016762,xyloglucan:xyloglucosyl transferase activity; GO:0042546,cell wall biogenesis; GO:0071555,cell wall organization; GO:0010411,xyloglucan metabolic process; GO:0003674,molecular_function; GO:0003824,catalytic activity; GO:0016787,hydrolase a…	PF00722.24:Glycosyl hydrolases family 16	--	--	--
LOC123222600	14390	9508	15756	1555	2047	1844	292.342	238.22	288.172	31.1251	42.6376	44.96	272.911633333333	39.5742333333333	-2.7858	4.52697013251618e-18	1.12383774682073e-15	NC_058144.1	1861551	1863428	+	LOC123222600	--	K08237 hydroquinone glucosyltransferase [EC:2.4.1.218] | (RefSeq) hydroquinone glucosyltransferase-like (A)	--	hydroquinone glucosyltransferase-like [Mangifera indica]	HQGT_RAUSE RecName: Full=Hydroquinone glucosyltransferase; EC=2.4.1.218; AltName: Full=Arbutin synthase;	A0A061DTQ3_THECC RecName: Full=Glycosyltransferase {ECO:0000256|RuleBase:RU362057}; EC=2.4.1.- {ECO:0000256|RuleBase:RU362057};	UDP-glucuronosyl and UDP-glucosyl transferase	GO:0050505,hydroquinone glucosyltransferase activity; GO:0003674,molecular_function; GO:0003824,catalytic activity; GO:0008194,UDP-glycosyltransferase activity; GO:0016740,transferase activity; GO:0016757,glycosyltransferase activity; GO:0016758,hexosyltransferase activity; GO:0035251,UDP-glucosyltransferase activity; GO:0046527,glucosyltransferase activity	PF00201.21:UDP-glucoronosyl and UDP-glucosyl transferase	--	--	--
LOC123221264	17	43	51	3214	1564	663	0.1624	0.5066	0.4387	30.2532	15.32	7.6019	0.369233333333333	17.7250333333333	5.58511172908387	4.59566044845066e-18	1.13218129505991e-15	NC_058143.1	18564052	18569342	+	LOC123221264	--	K01148 poly(A)-specific ribonuclease [EC:3.1.13.4] | (RefSeq) uncharacterized CRM domain-containing protein At3g25440, chloroplastic isoform X1 (A)	ko03018: RNA degradation	CRM-domain containing factor CFM3A, chloroplastic/mitochondrial-like isoform X1 [Mangifera indica]	CFM3A_ARATH RecName: Full=CRM-domain containing factor CFM3A, chloroplastic/mitochondrial {ECO:0000305}; AltName: Full=Protein CRM FAMILY MEMBER 3A {ECO:0000303|PubMed:18799595}; Short=AtCFM3a {ECO:0000303|PubMed:18799595}; Flags: Precursor;	V4S3J5_CITCL SubName: Full=Uncharacterized protein {ECO:0000313|EMBL:ESR33355.1};	Poly(A)-specific exoribonuclease PARN	GO:0009507,chloroplast; GO:0005739,mitochondrion; GO:0003729,mRNA binding; GO:0000373,Group II intron splicing; GO:0006397,mRNA processing; GO:0048316,seed development; GO:0003674,molecular_function; GO:0003676,nucleic acid binding; GO:0003723,RNA binding; GO:0005488,binding; GO:0097159,organic cyclic compound binding; GO:1901363,heterocyclic compound binding; GO:0000375,RNA splicing, via transes…	PF01985.24:CRS1 / YhbY (CRM) domain	--	--	--
LOC123196277	118	152	150	1520	1307	1116	2.9828	4.7385	3.4136	37.8558	33.8734	33.8562	3.71163333333333	35.1951333333333	3.24524985060646	4.83166912833194e-18	1.17399422762874e-15	NC_058150.1	5180369	5184480	-	LOC123196277	--	K17081 prohibitin 2 | (RefSeq) prohibitin-1, mitochondrial-like (A)	--	prohibitin-1, mitochondrial-like [Mangifera indica]	PHB1_ARATH RecName: Full=Prohibitin-1, mitochondrial; Short=Atphb1;	A0A5C7HE89_9ROSI RecName: Full=Prohibitin {ECO:0000256|RuleBase:RU366048};	Prohibitin-like protein	GO:0005747,mitochondrial respiratory chain complex I; GO:0005739,mitochondrion; GO:0000325,plant-type vacuole; GO:0007005,mitochondrion organization; GO:0006996,organelle organization; GO:0008150,biological_process; GO:0009987,cellular process; GO:0016043,cellular component organization; GO:0071840,cellular component organization or biogenesis; GO:0005575,cellular_component; GO:0005622,intracellu…	PF01145.28:SPFH domain / Band 7 family	--	--	--
LOC123207320	189	107	305	4851	3541	1773	0.8953	0.6251	1.3007	22.6406	17.198	10.0798	0.940366666666667	16.6394666666667	4.14524198184033	4.8381381425533e-18	1.17399422762874e-15	NW_025401163.1	53397	136552	+	LOC123207320	--	K13418 somatic embryogenesis receptor kinase 1 [EC:2.7.10.1 2.7.11.1] | (RefSeq) somatic embryogenesis receptor kinase 2 (A)	--	probable LRR receptor-like serine/threonine-protein kinase At1g53430 isoform X3 [Mangifera indica]	Y5343_ARATH RecName: Full=Probable LRR receptor-like serine/threonine-protein kinase At1g53430; EC=2.7.11.1; Flags: Precursor;	A0A067DHQ0_CITSI RecName: Full=Protein kinase domain-containing protein {ECO:0000259|PROSITE:PS50011};	--	GO:0016021,integral component of membrane; GO:0005886,plasma membrane; GO:0005524,ATP binding; GO:0106310,protein serine kinase activity; GO:0004674,protein serine/threonine kinase activity; GO:0006468,protein phosphorylation; GO:0000166,nucleotide binding; GO:0003674,molecular_function; GO:0005488,binding; GO:0017076,purine nucleotide binding; GO:0030554,adenyl nucleotide binding; GO:0032553,rib…	PF07714.20:Protein tyrosine and serine/threonine kinase	--	--	--
LOC123215796	460	247	350	35	30	15	9.7564	6.4608	6.6831	0.7314	0.6524	0.3818	7.63343333333333	0.588533333333333	-3.69714	4.88508104183343e-18	1.17653895867978e-15	NC_058141.1	10931148	10935966	-	LOC123215796	--	K16297 serine carboxypeptidase-like clade II [EC:3.4.16.-] | (RefSeq) serine carboxypeptidase-like 34 (A)	--	serine carboxypeptidase-like 34 [Mangifera indica]	SCP34_ARATH RecName: Full=Serine carboxypeptidase-like 34; EC=3.4.16.-; Flags: Precursor;	V4SSM4_CITCL RecName: Full=Carboxypeptidase {ECO:0000256|RuleBase:RU361156}; EC=3.4.16.- {ECO:0000256|RuleBase:RU361156};	Serine carboxypeptidases (lysosomal cathepsin A)	GO:0005576,extracellular region; GO:0000325,plant-type vacuole; GO:0004185,serine-type carboxypeptidase activity; GO:0006508,proteolysis; GO:0003674,molecular_function; GO:0003824,catalytic activity; GO:0004180,carboxypeptidase activity; GO:0008233,peptidase activity; GO:0008236,serine-type peptidase activity; GO:0008238,exopeptidase activity; GO:0016787,hydrolase activity; GO:0017171,serine hydr…	PF00450.25:Serine carboxypeptidase	--	--	--
LOC123193692	3559	2842	2531	103	115	223	62.961	62.005	40.3099	1.7953	2.0859	4.7346	55.0919666666667	2.87193333333333	-4.26175	5.53366051910555e-18	1.32287278468958e-15	NC_058148.1	9446462	9452321	-	LOC123193692	--	K24810 inhibitor of Bruton tyrosine kinase | (RefSeq) uncharacterized protein LOC123205021 isoform X1 (A)	--	ultraviolet-B receptor UVR8-like isoform X1 [Mangifera indica]	UVR8_ARATH RecName: Full=Ultraviolet-B receptor UVR8 {ECO:0000303|PubMed:12226503}; AltName: Full=Protein UV-B RESISTANCE 8 {ECO:0000303|PubMed:12226503}; AltName: Full=RCC1 domain-containing protein UVR8 {ECO:0000303|PubMed:12226503};	A0A2H5Q379_CITUN SubName: Full=Uncharacterized protein {ECO:0000313|EMBL:GAY59099.1};	FOG: RCC1 domain	GO:0000785,chromatin; GO:0005829,cytosol; GO:0005634,nucleus; GO:0009536,plastid; GO:0003682,chromatin binding; GO:0005085,guanyl-nucleotide exchange factor activity; GO:0042802,identical protein binding; GO:0009881,photoreceptor activity; GO:0042803,protein homodimerization activity; GO:0009649,entrainment of circadian clock; GO:0009411,response to UV; GO:0010224,response to UV-B; GO:0003674,mol…	PF00415.21:Regulator of chromosome condensation (RCC1) repeat	--	--	--
LOC123208591	2	2	4	585	412	120	0.0465	0.0574	0.0838	13.4132	9.8303	3.3515	0.0625666666666667	8.865	7.14658257656369	5.72911458314582e-18	1.35952731574901e-15	NC_058138.1	15110619	15112130	+	LOC123208591	--	K13496 UDP-glucosyltransferase 73C [EC:2.4.1.-] | (RefSeq) UDP-glycosyltransferase 73C3-like (A)	ko00908: Zeatin biosynthesis; ko01110: Biosynthesis of secondary metabolites	UDP-glycosyltransferase 92A1-like [Mangifera indica]	U92A1_ARATH RecName: Full=UDP-glycosyltransferase 92A1; EC=2.4.1.-;	V4W0A8_CITCL RecName: Full=Glycosyltransferase {ECO:0000256|RuleBase:RU362057}; EC=2.4.1.- {ECO:0000256|RuleBase:RU362057};	UDP-glucuronosyl and UDP-glucosyl transferase	GO:0008194,UDP-glycosyltransferase activity; GO:0003674,molecular_function; GO:0003824,catalytic activity; GO:0016740,transferase activity; GO:0016757,glycosyltransferase activity	PF00201.21:UDP-glucoronosyl and UDP-glucosyl transferase	--	--	--
LOC123196338	48	62	50	4104	2755	692	1.7199	2.7398	1.6129	144.885	101.212	29.7583	2.0242	91.9518333333333	5.50545459244089	6.5200668793113e-18	1.53592787150375e-15	NC_058150.1	193045	194223	+	LOC123196338	--	K01802 peptidylprolyl isomerase [EC:5.2.1.8] | (RefSeq) peptidyl-prolyl cis-trans isomerase FKBP13, chloroplastic (A)	--	peptidyl-prolyl cis-trans isomerase FKBP17-2, chloroplastic [Mangifera indica]	FK172_ARATH RecName: Full=Peptidyl-prolyl cis-trans isomerase FKBP17-2, chloroplastic; Short=PPIase FKBP17-2; EC=5.2.1.8; AltName: Full=FK506-binding protein 17-2; Short=AtFKBP17-2; AltName: Full=Immunophilin FKBP17-2; AltName: Full=Rotamase; Flags: Precursor;	A0A8J4RFB0_9ROSI RecName: Full=Peptidylprolyl isomerase {ECO:0000256|PROSITE-ProRule:PRU00277}; EC=5.2.1.8 {ECO:0000256|PROSITE-ProRule:PRU00277};	FKBP-type peptidyl-prolyl cis-trans isomerase	GO:0009507,chloroplast; GO:0009543,chloroplast thylakoid lumen; GO:0009535,chloroplast thylakoid membrane; GO:0005634,nucleus; GO:0003755,peptidyl-prolyl cis-trans isomerase activity; GO:0003674,molecular_function; GO:0003824,catalytic activity; GO:0016853,isomerase activity; GO:0016859,cis-trans isomerase activity; GO:0140096,catalytic activity, acting on a protein; GO:0005575,cellular_component…	PF00254.31:FKBP-type peptidyl-prolyl cis-trans isomerase	--	--	--
LOC123199593	359	607	426	7	24	8	5.8836	12.2686	6.2854	0.113	0.4033	0.1574	8.14586666666667	0.224566666666667	-5.18085	7.12023586485431e-18	1.66515487004669e-15	NC_058152.1	1053249	1057449	+	LOC123199593	--	K03327 multidrug resistance protein, MATE family | (RefSeq) protein DETOXIFICATION 45, chloroplastic-like (A)	--	protein DETOXIFICATION 45, chloroplastic-like [Mangifera indica]	DTX45_ARATH RecName: Full=Protein DETOXIFICATION 45, chloroplastic {ECO:0000303|PubMed:11739388}; Short=AtDTX45 {ECO:0000303|PubMed:11739388}; AltName: Full=Multidrug and toxic compound extrusion protein 45 {ECO:0000305}; Short=MATE protein 45 {ECO:0000305}; Flags: Precursor;	A0A067G7P6_CITSI RecName: Full=Protein DETOXIFICATION {ECO:0000256|RuleBase:RU004914}; AltName: Full=Multidrug and toxic compound extrusion protein {ECO:0000256|RuleBase:RU004914};	Uncharacterized membrane protein, predicted efflux pump	GO:0009507,chloroplast; GO:0031969,chloroplast membrane; GO:0016021,integral component of membrane; GO:0015297,antiporter activity; GO:0042910,xenobiotic transmembrane transporter activity; GO:0003674,molecular_function; GO:0005215,transporter activity; GO:0015291,secondary active transmembrane transporter activity; GO:0022804,active transmembrane transporter activity; GO:0022857,transmembrane tr…	PF01554.21:MatE	--	--	--
LOC123202283	1102	898	1134	155	164	169	21.0395	21.1441	19.4914	2.9156	3.2103	3.8723	20.5583333333333	3.33273333333333	-2.62495	8.03098931857372e-18	1.86463394444842e-15	NC_058154.1	10699381	10702939	-	LOC123202283	--	K05350 beta-glucosidase [EC:3.2.1.21] | (RefSeq) beta-glucosidase 18-like isoform X1 (A)	ko00460: Cyanoamino acid metabolism; ko00500: Starch and sucrose metabolism; ko00999: Biosynthesis of various plant secondary metabolites; ko01100: Metabolic pathways; ko01110: Biosynthesis of secondary metabolites	beta-glucosidase 18-like isoform X1 [Mangifera indica]	BGL18_ORYSJ RecName: Full=Beta-glucosidase 18 {ECO:0000303|PubMed:17196101}; Short=Os4bglu18 {ECO:0000303|PubMed:17196101}; EC=3.2.1.21 {ECO:0000269|PubMed:23811195, ECO:0000269|PubMed:25219312}; Flags: Precursor;	V4UGI1_CITCL SubName: Full=Uncharacterized protein {ECO:0000313|EMBL:ESR65177.1};	Beta-glucosidase, lactase phlorizinhydrolase, and related proteins	GO:0033907,beta-D-fucosidase activity; GO:0004565,beta-galactosidase activity; GO:0008422,beta-glucosidase activity; GO:0047782,coniferin beta-glucosidase activity; GO:0102483,scopolin beta-glucosidase activity; GO:0005975,carbohydrate metabolic process; GO:0033491,coniferin metabolic process; GO:0016137,glycoside metabolic process; GO:0003674,molecular_function; GO:0003824,catalytic activity; GO…	PF00232.21:Glycosyl hydrolase family 1	--	--	--
LOC123217638	1042	1447	1463	244	159	158	25.5859	43.8187	32.3409	5.903	4.0029	4.6561	33.9151666666667	4.854	-2.80468	9.7581798836466e-18	2.24946956703519e-15	NC_058141.1	12861028	12864036	-	LOC123217638	--	--	--	protein NEOXANTHIN-DEFICIENT 1-like [Mangifera indica]	NDX1_SOLLC RecName: Full=Protein NEOXANTHIN-DEFICIENT 1 {ECO:0000303|PubMed:24506237};	V4TFI8_CITCL SubName: Full=Uncharacterized protein {ECO:0000313|EMBL:ESR52107.1};	--	GO:0016123,xanthophyll biosynthetic process; GO:0006629,lipid metabolic process; GO:0006720,isoprenoid metabolic process; GO:0006721,terpenoid metabolic process; GO:0008150,biological_process; GO:0008152,metabolic process; GO:0008299,isoprenoid biosynthetic process; GO:0008610,lipid biosynthetic process; GO:0009058,biosynthetic process; GO:0009987,cellular process; GO:0016108,tetraterpenoid metab…	PF06314.14:Acetoacetate decarboxylase (ADC)	--	--	--
LOC123215655	4253	2543	4799	457	346	533	78.2683	57.716	79.5092	8.2862	6.5285	11.7721	71.8311666666667	8.86226666666667	-3.01886	1.08280588095631e-17	2.47839675149667e-15	NC_058141.1	16516925	16521502	-	LOC123215655	--	K13832 3-dehydroquinate dehydratase / shikimate dehydrogenase [EC:4.2.1.10 1.1.1.25] | (RefSeq) bifunctional 3-dehydroquinate dehydratase/shikimate dehydrogenase, chloroplastic-like (A)	ko00400: Phenylalanine, tyrosine and tryptophan biosynthesis; ko00999: Biosynthesis of various plant secondary metabolites; ko01100: Metabolic pathways; ko01110: Biosynthesis of secondary metabolites; ko01230: Biosynthesis of amino acids	bifunctional 3-dehydroquinate dehydratase/shikimate dehydrogenase, chloroplastic-like [Mangifera indica]	DHQSD_ARATH RecName: Full=Bifunctional 3-dehydroquinate dehydratase/shikimate dehydrogenase, chloroplastic {ECO:0000303|PubMed:16784230}; Short=DHQ-SDH protein {ECO:0000303|PubMed:16784230}; AltName: Full=DHQase-SORase {ECO:0000305}; AltName: Full=Protein EMBRYO DEFECTIVE 3004 {ECO:0000305}; Includes: RecName: Full=Dehydroquinate dehydratase {ECO:0000303|PubMed:16784230}; Short=DHQ {ECO:0000303|P…	A0A8J4RFE1_9ROSI RecName: Full=Shikimate dehydrogenase (NADP(+)) {ECO:0000256|ARBA:ARBA00012962}; EC=1.1.1.25 {ECO:0000256|ARBA:ARBA00012962};	Pentafunctional AROM protein	GO:0009507,chloroplast; GO:0009570,chloroplast stroma; GO:0003855,3-dehydroquinate dehydratase activity; GO:0050661,NADP binding; GO:0004764,shikimate 3-dehydrogenase (NADP+) activity; GO:0009073,aromatic amino acid family biosynthetic process; GO:0008652,cellular amino acid biosynthetic process; GO:0009423,chorismate biosynthetic process; GO:0009793,embryo development ending in seed dormancy; GO…	PF01487.18:Type I 3-dehydroquinase	--	--	--
LOC123213027	24	63	72	8359	7492	866	0.8428	2.7284	2.2762	289.211	269.745	36.4975	1.94913333333333	198.484266666667	6.67004805933056	1.14805244508731e-17	2.60923215213401e-15	NC_058140.1	12173518	12174805	-	LOC123213027	--	--	--	CCG-binding protein 1 [Mangifera indica]	MEE14_ARATH RecName: Full=CCG-binding protein 1; Short=AtCBP1 {ECO:0000303|PubMed:26462908}; AltName: Full=Protein MATERNAL EFFECT EMBRYO ARREST 14 {ECO:0000305};	M1TD91_9ROSI SubName: Full=Maternal effect embryo arrest 14-1 {ECO:0000313|EMBL:AGG19190.1}; SubName: Full=Maternal effect embryo arrest 14-1 protein {ECO:0000313|EMBL:AGG38104.1};	--	GO:0009507,chloroplast; GO:0005829,cytosol; GO:0005634,nucleus; GO:0036033,mediator complex binding; GO:0071456,cellular response to hypoxia; GO:0050832,defense response to fungus; GO:0009793,embryo development ending in seed dormancy; GO:0010183,pollen tube guidance; GO:0003674,molecular_function; GO:0005488,binding; GO:0044877,protein-containing complex binding; GO:0001666,response to hypoxia; …	--	--	--	--
LOC123217194	436	434	560	7617	6064	2983	7.9778	9.7937	9.2249	137.32	113.763	65.5069	8.9988	105.529966666667	3.55177629044815	1.19524616087767e-17	2.6974950594409e-15	NC_058141.1	12716216	12719485	+	LOC123217194	--	--	--	ACT domain-containing protein ACR4-like [Mangifera indica]	ACR4_ARATH RecName: Full=ACT domain-containing protein ACR4 {ECO:0000305}; AltName: Full=Protein ACT DOMAIN REPEATS 4 {ECO:0000303|PubMed:12481063};	A0A5C7HH49_9ROSI SubName: Full=Uncharacterized protein {ECO:0000313|EMBL:TXG56015.1};	--	GO:0009506,plasmodesma; GO:0005575,cellular_component; GO:0005911,cell-cell junction; GO:0030054,cell junction; GO:0055044,symplast; GO:0070161,anchoring junction; GO:0110165,cellular anatomical entity	PF01842.28:ACT domain	--	--	--
LOC123229359	116	122	122	2067	1658	886	1.8984	2.4624	1.7975	33.3296	27.8208	17.4024	2.05276666666667	26.1842666666667	3.67305864630841	1.32611355539e-17	2.9720599147987e-15	NC_058147.1	7972313	7977612	-	LOC123229359	--	K13179 ATP-dependent RNA helicase DDX18/HAS1 [EC:3.6.4.13] | (RefSeq) DEAD-box ATP-dependent RNA helicase 50 isoform X1 (A)	--	DEAD-box ATP-dependent RNA helicase 39-like [Mangifera indica]	RH39_ARATH RecName: Full=DEAD-box ATP-dependent RNA helicase 39; EC=3.6.4.13;	A0A5C7H903_9ROSI SubName: Full=Uncharacterized protein {ECO:0000313|EMBL:TXG53229.1};	ATP-dependent RNA helicase	GO:0009507,chloroplast; GO:0005739,mitochondrion; GO:0005524,ATP binding; GO:0016887,ATP hydrolysis activity; GO:0070180,large ribosomal subunit rRNA binding; GO:0003729,mRNA binding; GO:0003724,RNA helicase activity; GO:1901259,chloroplast rRNA processing; GO:1902775,mitochondrial large ribosomal subunit assembly; GO:0110102,ribulose bisphosphate carboxylase complex assembly; GO:0000166,nucleoti…	PF00270.32:DEAD/DEAH box helicase	--	--	--
LOC123204074	3323	4598	2228	215	224	84	69.3097	118.275	41.8364	4.4183	4.7902	2.1027	76.4735666666667	3.7704	-4.34217	1.3837645396903e-17	3.05488597669864e-15	NC_058156.1	10196269	10198455	+	LOC123204074	--	K12130 pseudo-response regulator 5 | (RefSeq) two-component response regulator-like APRR3 (A)	ko04712: Circadian rhythm - plant	zinc finger protein CONSTANS-LIKE 16-like [Mangifera indica]	COL16_ARATH RecName: Full=Zinc finger protein CONSTANS-LIKE 16;	A0A2C9VXF3_MANES SubName: Full=Uncharacterized protein {ECO:0000313|EMBL:OAY50458.1};	GATA-4/5/6 transcription factors	GO:0005634,nucleus; GO:0003700,DNA-binding transcription factor activity; GO:0008270,zinc ion binding; GO:0006355,regulation of DNA-templated transcription; GO:0003674,molecular_function; GO:0140110,transcription regulator activity; GO:0005488,binding; GO:0043167,ion binding; GO:0043169,cation binding; GO:0046872,metal ion binding; GO:0046914,transition metal ion binding; GO:0006139,nucleobase-co…	PF06203.17:CCT motif	C2C2-CO-like	TF	C2C2->C2C2-CO-like
LOC123221922	85	109	128	2370	1773	846	1.3015	2.0583	1.7645	35.7541	27.8344	15.5465	1.7081	26.3783333333333	3.94888906890467	1.38786815465744e-17	3.05488597669864e-15	NC_058143.1	19022671	19029712	-	LOC123221922	--	K03354 anaphase-promoting complex subunit 7 | (RefSeq) anaphase-promoting complex subunit 7 (A)	ko04120: Ubiquitin mediated proteolysis	anaphase-promoting complex subunit 7 [Mangifera indica]	APC7_ARATH RecName: Full=Anaphase-promoting complex subunit 7; AltName: Full=Cyclosome subunit 7;	V4S7L3_CITCL SubName: Full=Uncharacterized protein {ECO:0000313|EMBL:ESR32886.1};	Anaphase-promoting complex (APC), subunit 7	GO:0005680,anaphase-promoting complex; GO:0005737,cytoplasm; GO:0031145,anaphase-promoting complex-dependent catabolic process; GO:0051301,cell division; GO:0007091,metaphase/anaphase transition of mitotic cell cycle; GO:0045842,positive regulation of mitotic metaphase/anaphase transition; GO:0016567,protein ubiquitination; GO:0006508,proteolysis; GO:0006511,ubiquitin-dependent protein catabolic …	PF07719.20:Tetratricopeptide repeat	--	--	--
LOC123206680	24	35	32	997	613	342	0.2274	0.4089	0.2729	9.3064	5.9544	3.8886	0.303066666666667	6.38313333333333	4.39655769512766	1.3914672902262e-17	3.05488597669864e-15	NW_025401137.1	135346	145081	-	LOC123206680	--	K13416 brassinosteroid insensitive 1-associated receptor kinase 1 [EC:2.7.10.1 2.7.11.1] | (RefSeq) BRASSINOSTEROID INSENSITIVE 1-associated receptor kinase 1-like (A)	ko04016: MAPK signaling pathway - plant; ko04075: Plant hormone signal transduction; ko04626: Plant-pathogen interaction	probable LRR receptor-like serine/threonine-protein kinase At1g56140 isoform X1 [Mangifera indica]	Y5614_ARATH RecName: Full=Probable LRR receptor-like serine/threonine-protein kinase At1g56140; EC=2.7.11.1; Flags: Precursor;	A0A140G4X5_9ROSI SubName: Full=LRR-RLK {ECO:0000313|EMBL:AMM43097.1};	--	GO:0016021,integral component of membrane; GO:0005886,plasma membrane; GO:0005524,ATP binding; GO:0106310,protein serine kinase activity; GO:0004674,protein serine/threonine kinase activity; GO:0006468,protein phosphorylation; GO:0000166,nucleotide binding; GO:0003674,molecular_function; GO:0005488,binding; GO:0017076,purine nucleotide binding; GO:0030554,adenyl nucleotide binding; GO:0032553,rib…	PF07714.20:Protein tyrosine and serine/threonine kinase	--	--	--
LOC123229578	678	1354	730	39	22	50	13.5858	33.4604	13.169	0.77	0.452	1.2024	20.0717333333333	0.808133333333333	-4.63443	1.97732360348327e-17	4.31176788210916e-15	NC_058147.1	5992553	5996421	+	LOC123229578	--	K21604 jasmonoyl-L-amino acid hydrolase [EC:3.5.1.127] | (RefSeq) IAA-amino acid hydrolase ILR1-like 6 (A)	--	IAA-amino acid hydrolase ILR1-like 6 [Mangifera indica]	ILL6_ARATH RecName: Full=IAA-amino acid hydrolase ILR1-like 6 {ECO:0000303|PubMed:11923288}; EC=3.5.1.- {ECO:0000305}; AltName: Full=Protein gr1 {ECO:0000303|Ref.1}; AltName: Full=jasmonoyl-L-amino acid hydrolase {ECO:0000305}; EC=3.5.1.127 {ECO:0000269|PubMed:24052260}; Flags: Precursor;	A0A067GYS1_CITSI SubName: Full=Uncharacterized protein {ECO:0000313|EMBL:KDO80612.1};	--	GO:0016787,hydrolase activity; GO:1990206,jasmonyl-Ile conjugate hydrolase activity; GO:0046872,metal ion binding; GO:0009850,auxin metabolic process; GO:0009694,jasmonic acid metabolic process; GO:0010112,regulation of systemic acquired resistance; GO:0009753,response to jasmonic acid; GO:0003674,molecular_function; GO:0003824,catalytic activity; GO:0016810,hydrolase activity, acting on carbon-n…	PF01546.31:Peptidase family M20/M25/M40	--	--	--
LOC123217321	404	369	507	28	22	45	8.3867	9.447	9.4753	0.5727	0.4682	1.1211	9.103	0.720666666666667	-3.65894	2.04093390948822e-17	4.42060805777941e-15	NC_058141.1	12096266	12099756	-	LOC123217321	--	--	--	ninja-family protein AFP1-like isoform X1 [Mangifera indica]	AFP2_ARATH RecName: Full=Ninja-family protein AFP2; AltName: Full=ABI five-binding protein 2; Short=ABI5-binding protein 2;	V4TD28_CITCL RecName: Full=Ninja-family protein {ECO:0000256|RuleBase:RU369029}; AltName: Full=ABI-binding protein {ECO:0000256|RuleBase:RU369029};	--	GO:0005634,nucleus; GO:0045892,negative regulation of DNA-templated transcription; GO:0009737,response to abscisic acid; GO:0009414,response to water deprivation; GO:0007165,signal transduction; GO:0006139,nucleobase-containing compound metabolic process; GO:0006351,DNA-templated transcription; GO:0006355,regulation of DNA-templated transcription; GO:0006725,cellular aromatic compound metabolic p…	PF16136.8:Putative nuclear localisation signal	--	--	--
LOC123225675	646	886	758	8519	9321	7041	10.0003	16.915	10.5639	129.932	147.94	130.812	12.4930666666667	136.228133333333	3.44682511105328	2.59418709032442e-17	5.58147999773599e-15	NC_058137.1	4632274	4636804	-	LOC123225675	--	K16911 ATP-dependent RNA helicase DDX21 [EC:3.6.4.13] | (RefSeq) DEAD-box ATP-dependent RNA helicase 7-like (A)	--	DEAD-box ATP-dependent RNA helicase 53, mitochondrial-like [Mangifera indica]	RH53_ARATH RecName: Full=DEAD-box ATP-dependent RNA helicase 53, mitochondrial; EC=3.6.4.13; Flags: Precursor;	A0A067FAB1_CITSI SubName: Full=Uncharacterized protein {ECO:0000313|EMBL:KDO64253.1};	ATP-dependent RNA helicase	GO:0005737,cytoplasm; GO:0005829,cytosol; GO:0005739,mitochondrion; GO:0005730,nucleolus; GO:0005634,nucleus; GO:0009505,plant-type cell wall; GO:0032991,protein-containing complex; GO:0005524,ATP binding; GO:0016887,ATP hydrolysis activity; GO:0003729,mRNA binding; GO:0003724,RNA helicase activity; GO:0000373,Group II intron splicing; GO:0009409,response to cold; GO:0006364,rRNA processing; GO:0…	PF00270.32:DEAD/DEAH box helicase	--	--	--
LOC123205440	1734	1610	1350	261	223	162	63.358	72.5499	44.4081	9.396	8.3541	7.104	60.1053333333333	8.2847	-2.85897	3.63968693557062e-17	7.77904744845501e-15	NW_025401097.1	625378	627241	-	LOC123205440	--	--	--	--	--	--	--	--	--	--	--	--
LOC123202409	47	54	97	683	888	686	0.4844	0.6864	0.9	6.9356	9.3837	8.4854	0.690266666666667	8.26823333333333	3.58235338026265	4.1617920368535e-17	8.83641542140611e-15	NC_058154.1	9285461	9293388	+	LOC123202409	--	K13430 serine/threonine-protein kinase PBS1 [EC:2.7.11.1] | (RefSeq) serine/threonine-protein kinase PBS1-like (A)	ko04626: Plant-pathogen interaction	probable LRR receptor-like serine/threonine-protein kinase At1g53430 isoform X1 [Mangifera indica]	Y5343_ARATH RecName: Full=Probable LRR receptor-like serine/threonine-protein kinase At1g53430; EC=2.7.11.1; Flags: Precursor;	A0A067DHQ0_CITSI RecName: Full=Protein kinase domain-containing protein {ECO:0000259|PROSITE:PS50011};	--	GO:0016021,integral component of membrane; GO:0005886,plasma membrane; GO:0005524,ATP binding; GO:0106310,protein serine kinase activity; GO:0004674,protein serine/threonine kinase activity; GO:0006468,protein phosphorylation; GO:0000166,nucleotide binding; GO:0003674,molecular_function; GO:0005488,binding; GO:0017076,purine nucleotide binding; GO:0030554,adenyl nucleotide binding; GO:0032553,rib…	PF07714.20:Protein tyrosine and serine/threonine kinase	--	--	--
LOC123222461	24475	114385	6432	537	253	155	420.3	2422.5	99.4394	9.0857	4.4545	3.1945	980.748033333333	5.57823333333333	-7.45793	4.36814198468031e-17	9.21392459291423e-15	NC_058144.1	7140340	7143352	-	LOC123222461	--	K12742 isoprene synthase [EC:4.2.3.27] | (RefSeq) isoprene synthase, chloroplastic-like (A)	ko00900: Terpenoid backbone biosynthesis; ko01110: Biosynthesis of secondary metabolites	isoprene synthase, chloroplastic-like [Mangifera indica]	ISPS_POPAL RecName: Full=Isoprene synthase, chloroplastic {ECO:0000303|PubMed:15848197}; Short=PaIspS {ECO:0000303|PubMed:15848197}; EC=4.2.3.27 {ECO:0000269|PubMed:15848197}; Flags: Precursor;	A0A5C7HED4_9ROSI SubName: Full=Uncharacterized protein {ECO:0000313|EMBL:TXG55307.1};	--	GO:0009507,chloroplast; GO:0034009,isoprene synthase activity; GO:0000287,magnesium ion binding; GO:0071485,cellular response to absence of light; GO:0071482,cellular response to light stimulus; GO:0050993,dimethylallyl diphosphate metabolic process; GO:0016102,diterpenoid biosynthetic process; GO:0043612,isoprene biosynthetic process; GO:0009409,response to cold; GO:0009408,response to heat; GO:…	PF03936.19:Terpene synthase family, metal binding domain	--	--	--
LOC123195182	2189	1644	2575	161	286	233	42.0895	38.9842	44.5739	3.05	5.6382	5.3767	41.8825333333333	4.6883	-3.15921	4.52308370204343e-17	9.47879742311997e-15	NC_058149.1	15288314	15290495	-	LOC123195182	--	--	--	uncharacterized protein LOC123195182 [Mangifera indica]	--	A0A6P5XLE6_DURZI SubName: Full=uncharacterized protein LOC111284640 {ECO:0000313|RefSeq:XP_022729164.1};	--	--	PF10358.12:N-terminal C2 in EEIG1 and EHBP1 proteins	--	--	--
LOC123197350	3	3	7	233	157	125	0.0414	0.051	0.0869	3.1665	2.2203	2.0692	0.0597666666666667	2.48533333333333	5.37795446667327	4.84737600137533e-17	1.00928623027346e-14	NC_058138.1	13351212	13353762	+	LOC123197350	--	--	--	pentatricopeptide repeat-containing protein At1g71420 isoform X1 [Mangifera indica]	PP114_ARATH RecName: Full=Pentatricopeptide repeat-containing protein At1g71420;	A0A5C7H962_9ROSI RecName: Full=DYW_deaminase domain-containing protein {ECO:0000259|Pfam:PF14432};	FOG: PPR repeat	GO:0008270,zinc ion binding; GO:0003674,molecular_function; GO:0005488,binding; GO:0043167,ion binding; GO:0043169,cation binding; GO:0046872,metal ion binding; GO:0046914,transition metal ion binding	PF13041.9:PPR repeat family	--	--	--
LOC123198523	2197	1867	2861	17811	27433	18989	118.566	124.261	139.003	947.04	1517.92	1229.89	127.276733333333	1231.61746666667	3.27451361442443	5.09279200559271e-17	1.05358766920829e-14	NC_058152.1	11600551	11601490	-	LOC123198523	--	K13195 cold-inducible RNA-binding protein | (RefSeq) glycine-rich RNA-binding protein GRP2A-like (A)	--	glycine-rich RNA-binding protein 7-like [Mangifera indica]	GRP1_SINAL RecName: Full=Glycine-rich RNA-binding protein GRP1A;	A0A2P2JD12_RHIMU RecName: Full=RRM domain-containing protein {ECO:0000259|PROSITE:PS50102};	FOG: RRM domain	GO:0005634,nucleus; GO:0003723,RNA binding; GO:0003674,molecular_function; GO:0003676,nucleic acid binding; GO:0005488,binding; GO:0097159,organic cyclic compound binding; GO:1901363,heterocyclic compound binding; GO:0005575,cellular_component; GO:0005622,intracellular anatomical structure; GO:0043226,organelle; GO:0043227,membrane-bounded organelle; GO:0043229,intracellular organelle; GO:0043231…	PF00076.25:RNA recognition motif. (a.k.a. RRM, RBD, or RNP domain)	--	--	--
LOC123193510	152	216	348	6	8	14	7.1312	12.4977	14.6985	0.2773	0.3848	0.7883	11.4424666666667	0.483466666666667	-4.56484	5.89886349269085e-17	1.21257338534785e-14	NC_058148.1	10436921	10437670	+	LOC123193510	--	K13944 LOB domain-containing protein 16 | (RefSeq) LOB domain-containing protein 16-like (A)	--	LOB domain-containing protein 21-like [Mangifera indica]	LBD21_ARATH RecName: Full=LOB domain-containing protein 21; AltName: Full=ASYMMETRIC LEAVES 2-like protein 12; Short=AS2-like protein 12;	A0A067FNC5_CITSI RecName: Full=LOB domain-containing protein {ECO:0000259|PROSITE:PS50891};	--	--	PF03195.17:Lateral organ boundaries (LOB) domain	LOB	TF	LOB
LOC123196835	19	13	1	1001	1166	1358	1.013	0.8547	0.048	52.5797	63.7349	86.8898	0.638566666666667	67.7348	6.72891617932638	6.4216346608103e-17	1.31167984435652e-14	NC_058150.1	4154872	4155531	+	LOC123196835	--	--	--	uncharacterized protein LOC123196835 [Mangifera indica]	--	V4TIP5_CITCL SubName: Full=Uncharacterized protein {ECO:0000313|EMBL:ESR60278.1};	--	--	PF05553.14:Cotton fibre expressed protein	--	--	--
LOC123228653	375	456	491	9311	8384	3243	9.2144	13.8185	10.8616	225.414	211.218	95.635	11.2981666666667	177.422366666667	3.97302730057486	6.95397523800651e-17	1.41148203054204e-14	NC_058147.1	487989	492101	-	LOC123228653	--	K19658 peroxisomal enoyl-CoA hydratase 2 [EC:4.2.1.119] | (RefSeq) enoyl-CoA hydratase 2, peroxisomal (A)	--	enoyl-CoA hydratase 2, peroxisomal [Mangifera indica]	ECH2_ARATH RecName: Full=Enoyl-CoA hydratase 2, peroxisomal; EC=4.2.1.119;	V4V8N0_CITCL RecName: Full=MaoC-like domain-containing protein {ECO:0000259|Pfam:PF01575};	Peroxisomal multifunctional beta-oxidation protein and related enzymes	GO:0005739,mitochondrion; GO:0005777,peroxisome; GO:0044594,17-beta-hydroxysteroid dehydrogenase (NAD+) activity; GO:0003857,3-hydroxyacyl-CoA dehydrogenase activity; GO:0080023,3R-hydroxyacyl-CoA dehydratase activity; GO:0004300,enoyl-CoA hydratase activity; GO:0006635,fatty acid beta-oxidation; GO:0033542,fatty acid beta-oxidation, unsaturated, even number; GO:0003674,molecular_function; GO:000…	PF01575.22:MaoC like domain	--	--	--
LOC123211818	28	27	29	403	309	245	0.536	0.6375	0.4998	7.6013	6.0651	5.629	0.557766666666667	6.4318	3.5274889223965	7.63138474997216e-17	1.53929800022407e-14	NC_058139.1	3066630	3070103	+	LOC123211818	--	K01968 3-methylcrotonyl-CoA carboxylase alpha subunit [EC:6.4.1.4] | (RefSeq) LOW QUALITY PROTEIN: methylcrotonoyl-CoA carboxylase subunit alpha, mitochondrial (A)	ko00280: Valine, leucine and isoleucine degradation; ko01100: Metabolic pathways	serine/threonine-protein kinase STY13 [Mangifera indica]	STY13_ARATH RecName: Full=Serine/threonine-protein kinase STY13 {ECO:0000305}; EC=2.7.11.1 {ECO:0000269|PubMed:16429265}; AltName: Full=AtSTYPK {ECO:0000303|PubMed:17291444}; AltName: Full=Serine/threonine/tyrosine-protein kinase 13 {ECO:0000303|PubMed:16429265};	A0A061G1G4_THECC SubName: Full=Kinase superfamily protein {ECO:0000313|EMBL:EOY20889.1};	Tyrosine kinase specific for activated (GTP-bound) p21cdc42Hs	GO:0005737,cytoplasm; GO:0005524,ATP binding; GO:0004672,protein kinase activity; GO:0106310,protein serine kinase activity; GO:0004674,protein serine/threonine kinase activity; GO:0004712,protein serine/threonine/tyrosine kinase activity; GO:0004713,protein tyrosine kinase activity; GO:0006468,protein phosphorylation; GO:0045995,regulation of embryonic development; GO:0010344,seed oilbody biogen…	PF07714.20:Protein tyrosine and serine/threonine kinase	--	--	--
LOC123209788	1856	1668	2404	399	245	352	45.1948	50.0917	52.7013	9.5727	6.1168	10.287	49.3292666666667	8.65883333333333	-2.5102	8.07141002190193e-17	1.61794171203007e-14	NC_058137.1	22423374	22425285	+	LOC123209788	--	K26216 activator of Hsp90 ATPase protein 1 | (RefSeq) activator of 90 kDa heat shock protein ATPase homolog 1-like (A)	--	activator of 90 kDa heat shock protein ATPase homolog 1-like [Mangifera indica]	--	A0A067G5N9_CITSI RecName: Full=Aha1_N domain-containing protein {ECO:0000259|SMART:SM01000};	Uncharacterized conserved protein	GO:0005829,cytosol; GO:0001671,ATPase activator activity; GO:0051087,chaperone binding; GO:0051879,Hsp90 protein binding; GO:0032781,positive regulation of ATP-dependent activity; GO:0006457,protein folding; GO:0003674,molecular_function; GO:0098772,molecular function regulator activity; GO:0140677,molecular function activator activity; GO:0005488,binding; GO:0005515,protein binding; GO:0031072,h…	PF09229.14:Activator of Hsp90 ATPase, N-terminal	--	--	--
LOC123229140	34055	31035	31241	6279	3907	5110	542.21	609.392	447.803	98.4976	63.7785	97.6431	533.134966666667	86.6397333333334	-2.6214	8.69085020916147e-17	1.72424984200277e-14	NC_058137.1	9041929	9045013	-	LOC123229140	--	K01858 myo-inositol-1-phosphate synthase [EC:5.5.1.4] | (RefSeq) inositol-3-phosphate synthase (A)	ko00562: Inositol phosphate metabolism; ko01100: Metabolic pathways; ko01110: Biosynthesis of secondary metabolites	inositol-3-phosphate synthase [Mangifera indica]	INO1_NICPA RecName: Full=Inositol-3-phosphate synthase; Short=MIP synthase; EC=5.5.1.4; AltName: Full=Myo-inositol 1-phosphate synthase; Short=IPS; Short=MI-1-P synthase;	A0A1S3XLH4_TOBAC RecName: Full=Inositol-3-phosphate synthase {ECO:0000256|ARBA:ARBA00012125}; EC=5.5.1.4 {ECO:0000256|ARBA:ARBA00012125};	Myo-inositol-1-phosphate synthase	GO:0005737,cytoplasm; GO:0004512,inositol-3-phosphate synthase activity; GO:0006021,inositol biosynthetic process; GO:0008654,phospholipid biosynthetic process; GO:0003674,molecular_function; GO:0003824,catalytic activity; GO:0016853,isomerase activity; GO:0016872,intramolecular lyase activity; GO:0005975,carbohydrate metabolic process; GO:0006020,inositol metabolic process; GO:0006066,alcohol me…	PF07994.15:Myo-inositol-1-phosphate synthase	--	--	--
LOC123193355	147	144	149	1422	1229	916	1.8606	2.2478	1.6978	17.733	15.9489	13.9144	1.9354	15.8654333333333	3.03518325399718	8.70860236874325e-17	1.72424984200277e-14	NC_058148.1	11849746	11858309	+	LOC123193355	--	--	--	proline-, glutamic acid- and leucine-rich protein 1-like isoform X1 [Mangifera indica]	--	A0A5C7GXM0_9ROSI RecName: Full=RIX1 domain-containing protein {ECO:0000259|Pfam:PF08167};	--	GO:0005634,nucleus; GO:0005575,cellular_component; GO:0005622,intracellular anatomical structure; GO:0043226,organelle; GO:0043227,membrane-bounded organelle; GO:0043229,intracellular organelle; GO:0043231,intracellular membrane-bounded organelle; GO:0110165,cellular anatomical entity	PF08167.15:rRNA processing/ribosome biogenesis	--	--	--
LOC123213966	86042	75705	77318	14372	14140	7599	2856.16	3099.25	2310.62	470.045	481.245	302.736	2755.34503333333	418.008466666667	-2.72063	8.96097798061717e-17	1.76340025834425e-14	NC_058140.1	15484765	15486086	+	LOC123213966	--	K08909 light-harvesting complex I chlorophyll a/b binding protein 3 | (RefSeq) photosystem I chlorophyll a/b-binding protein 3-1, chloroplastic (A)	ko00196: Photosynthesis - antenna proteins; ko01100: Metabolic pathways	photosystem I chlorophyll a/b-binding protein 3-1, chloroplastic [Mangifera indica]	LHCA3_ARATH RecName: Full=Photosystem I chlorophyll a/b-binding protein 3-1, chloroplastic {ECO:0000303|PubMed:8115553}; Short=Lhca3*1 {ECO:0000303|PubMed:8115553}; AltName: Full=LHCI type III LHCA3 {ECO:0000305}; Flags: Precursor;	A0A067DX06_CITSI RecName: Full=Chlorophyll a-b binding protein, chloroplastic {ECO:0000256|RuleBase:RU363080};	--	GO:0009507,chloroplast; GO:0009534,chloroplast thylakoid; GO:0009535,chloroplast thylakoid membrane; GO:0016021,integral component of membrane; GO:0005634,nucleus; GO:0009522,photosystem I; GO:0010287,plastoglobule; GO:0009579,thylakoid; GO:0016168,chlorophyll binding; GO:0046872,metal ion binding; GO:0003729,mRNA binding; GO:0019904,protein domain specific binding; GO:0009768,photosynthesis, lig…	PF00504.24:Chlorophyll A-B binding protein	--	--	--
LOC123222941	649	1382	1285	63	75	90	7.9182	20.7946	14.1144	0.7573	0.9382	1.3178	14.2757333333333	1.00443333333333	-3.82911	1.05334893580907e-16	2.06028667911309e-14	NC_058144.1	2773095	2777272	-	LOC123222941	--	K24194 boron transporter | (RefSeq) probable boron transporter 2 (A)	--	probable boron transporter 2 [Mangifera indica]	BOR2_ARATH RecName: Full=Probable boron transporter 2;	A0A067HFS4_CITSI SubName: Full=Uncharacterized protein {ECO:0000313|EMBL:KDO86872.1};	Na+-independent Cl/HCO3 exchanger AE1 and related transporters (SLC4 family)	GO:0016021,integral component of membrane; GO:0005886,plasma membrane; GO:0046715,active borate transmembrane transporter activity; GO:0015301,NA; GO:0005452,solute:inorganic anion antiporter activity; GO:0022857,transmembrane transporter activity; GO:0050801,ion homeostasis; GO:0048364,root development; GO:0055085,transmembrane transport; GO:0003674,molecular_function; GO:0005215,transporter act…	PF00955.24:HCO3- transporter family	--	--	--
LOC123193336	348	249	297	2571	2493	1975	4.2845	3.7807	3.2919	31.1866	31.469	29.1822	3.7857	30.6126	3.01549358807035	1.1081923829216e-16	2.15449956470053e-14	NC_058148.1	551277	554134	-	LOC123193336	--	K17964 leucine-rich PPR motif-containing protein, mitochondrial | (RefSeq) pentatricopeptide repeat-containing protein At5g57250, mitochondrial (A)	--	pentatricopeptide repeat-containing protein At1g10270-like [Mangifera indica]	PPR29_ARATH RecName: Full=Pentatricopeptide repeat-containing protein At1g10270; AltName: Full=Protein GLUTAMINE-RICH PROTEIN 23;	V4SVE2_CITCL SubName: Full=Uncharacterized protein {ECO:0000313|EMBL:ESR44732.1};	FOG: PPR repeat	GO:0009507,chloroplast; GO:0005739,mitochondrion; GO:0005634,nucleus; GO:0051301,cell division; GO:0009793,embryo development ending in seed dormancy; GO:0008150,biological_process; GO:0009987,cellular process; GO:0000003,reproduction; GO:0003006,developmental process involved in reproduction; GO:0007275,multicellular organism development; GO:0009790,embryo development; GO:0009791,post-embryonic …	PF13041.9:PPR repeat family	--	--	--
LOC123220889	125	400	144	9993	11292	7273	5.1084	20.1602	5.298	402.365	473.141	356.717	10.1888666666667	410.740966666667	5.33316335572482	1.34478369159635e-16	2.59881461550234e-14	NC_058143.1	13448044	13449335	-	LOC123220889	--	K09510 DnaJ homolog subfamily B member 4 | (RefSeq) dnaJ protein homolog 1-like (A)	--	chaperone protein DnaJ-like [Mangifera indica]	DNJ36_ARATH RecName: Full=DnaJ protein P58IPK homolog; Short=AtP58IPK; AltName: Full=Chaperone protein dnaJ 36; Short=AtDjA36; Short=AtJ36; Flags: Precursor;	A0A6J1A8L0_9ROSI SubName: Full=dnaJ homolog subfamily B member 6 {ECO:0000313|RefSeq:XP_021283477.1};	Molecular chaperone (DnaJ superfamily)	GO:0005783,endoplasmic reticulum; GO:0005788,endoplasmic reticulum lumen; GO:0044794,positive regulation by host of viral process; GO:0008150,biological_process; GO:0016032,viral process; GO:0044403,biological process involved in symbiotic interaction; GO:0044419,biological process involved in interspecies interaction between organisms; GO:0044788,modulation by host of viral process; GO:0051702,b…	PF00226.34:DnaJ domain	--	--	--
LOC123209970	61	45	73	544	626	657	2.5163	2.2893	2.711	22.1094	26.4757	32.5259	2.50553333333333	27.037	3.43174544396045	1.56221637100988e-16	3.00103624652392e-14	NC_058139.1	4614997	4617132	+	LOC123209970	--	--	--	protein NONRESPONDING TO OXYLIPINS 2, mitochondrial-like isoform X1 [Mangifera indica]	NOXY2_ARATH RecName: Full=Protein NONRESPONDING TO OXYLIPINS 2, mitochondrial {ECO:0000303|PubMed:17369372, ECO:0000303|PubMed:23370715}; Flags: Precursor;	A0A067FD99_CITSI SubName: Full=Uncharacterized protein {ECO:0000313|EMBL:KDO61432.1};	--	GO:0005739,mitochondrion; GO:0052543,callose deposition in cell wall; GO:0071433,cell wall repair; GO:0042742,defense response to bacterium; GO:0050832,defense response to fungus; GO:0010311,lateral root formation; GO:0019372,lipoxygenase pathway; GO:0048311,mitochondrion distribution; GO:0031407,oxylipin metabolic process; GO:2000023,regulation of lateral root development; GO:0010821,regulation …	PF18973.3:Putative Chitin binding like	--	--	--
LOC123215129	1299	1203	3538	59	107	127	59.8266	68.3297	146.696	2.6772	5.0526	7.0198	91.6175	4.91653333333333	-4.21991	1.72453196352794e-16	3.29324379046965e-14	NC_058137.1	4168044	4168807	+	LOC123215129	--	--	--	uncharacterized protein LOC123215129 [Mangifera indica]	--	A0A8K0GWY3_9ROSA SubName: Full=Uncharacterized protein {ECO:0000313|EMBL:KAF3441729.1};	--	--	--	--	--	--
LOC123212253	63	57	122	2451	1392	681	0.6825	0.7615	1.1899	26.161	15.4613	8.8541	0.877966666666667	16.8254666666667	4.26033654267143	1.81194537414234e-16	3.43981841527623e-14	NC_058139.1	6958966	6964023	-	LOC123212253	--	K14558 periodic tryptophan protein 2 | (RefSeq) periodic tryptophan protein 2 (A)	ko03008: Ribosome biogenesis in eukaryotes	periodic tryptophan protein 2 [Mangifera indica]	PWP2_ARATH RecName: Full=Periodic tryptophan protein 2 {ECO:0000303|PubMed:19929880}; Short=AtPWP2 {ECO:0000303|PubMed:19929880, ECO:0000303|PubMed:23382868};	A0A5C7IJI3_9ROSI RecName: Full=Utp12 domain-containing protein {ECO:0000259|Pfam:PF04003};	WD40-repeat-containing subunit of the 18S rRNA processing complex	GO:0080008,Cul4-RING E3 ubiquitin ligase complex; GO:0005730,nucleolus; GO:0005634,nucleus; GO:0034388,Pwp2p-containing subcomplex of 90S preribosome; GO:0032040,small-subunit processome; GO:0009553,embryo sac development; GO:0000462,maturation of SSU-rRNA from tricistronic rRNA transcript (SSU-rRNA, 5.8S rRNA, LSU-rRNA); GO:0010119,regulation of stomatal movement; GO:0009744,response to sucrose;…	PF00400.35:WD domain, G-beta repeat	--	--	--
LOC123200161	2325	2787	2244	108	165	225	100.999	149.31	87.7591	4.6224	7.3489	11.7303	112.689	7.90053333333333	-3.83426	2.45684777674754e-16	4.63683323385809e-14	NC_058153.1	5114255	5115064	+	LOC123200161	--	K13993 HSP20 family protein | (RefSeq) 17.9 kDa class II heat shock protein-like (A)	ko04141: Protein processing in endoplasmic reticulum	17.9 kDa class II heat shock protein-like [Mangifera indica]	HSP21_SOYBN RecName: Full=17.9 kDa class II heat shock protein;	A0A6M2F930_9ROSI RecName: Full=SHSP domain-containing protein {ECO:0000259|PROSITE:PS01031};	Molecular chaperone (small heat-shock protein Hsp26/Hsp42)	GO:0005737,cytoplasm; GO:0043621,protein self-association; GO:0051082,unfolded protein binding; GO:0051259,protein complex oligomerization; GO:0006457,protein folding; GO:0009408,response to heat; GO:0042542,response to hydrogen peroxide; GO:0009651,response to salt stress; GO:0003674,molecular_function; GO:0005488,binding; GO:0005515,protein binding; GO:0008150,biological_process; GO:0009987,cel…	PF00011.24:Hsp20/alpha crystallin family	--	--	--
LOC123196699	75	79	85	4608	2091	810	0.6416	0.8335	0.6547	38.8402	18.3408	8.3165	0.709933333333333	21.8325	4.94264997602255	2.96927428795219e-16	5.57135983110937e-14	NC_058150.1	8016650	8027971	-	LOC123196699	--	--	--	homeobox-DDT domain protein RLT3 isoform X1 [Mangifera indica]	RLT3_ARATH RecName: Full=Homeobox-DDT domain protein RLT3 {ECO:0000305}; AltName: Full=Protein RINGLET 3 {ECO:0000305};	A0A067EIJ0_CITSI SubName: Full=Uncharacterized protein {ECO:0000313|EMBL:KDO51047.1};	--	GO:0005634,nucleus; GO:0005667,transcription regulator complex; GO:0000981,DNA-binding transcription factor activity, RNA polymerase II-specific; GO:0000978,RNA polymerase II cis-regulatory region sequence-specific DNA binding; GO:0009908,flower development; GO:0006357,regulation of transcription by RNA polymerase II; GO:0003674,molecular_function; GO:0003700,DNA-binding transcription factor acti…	PF15613.9:Williams-Beuren syndrome DDT (WSD), D-TOX E motif	HB-other	TF	HB->HB-other
LOC123224211	126	134	192	2732	2109	959	1.6216	2.1269	2.2246	34.6425	27.8292	14.8127	1.99103333333333	25.7614666666667	3.69362545255878	3.00377320694397e-16	5.60351287327761e-14	NC_058144.1	1922770	1927843	-	LOC123224211	--	K13179 ATP-dependent RNA helicase DDX18/HAS1 [EC:3.6.4.13] | (RefSeq) DEAD-box ATP-dependent RNA helicase 51-like (A)	--	DEAD-box ATP-dependent RNA helicase 31-like [Mangifera indica]	RH31_ARATH RecName: Full=DEAD-box ATP-dependent RNA helicase 31; EC=3.6.4.13;	V4TX15_CITCL SubName: Full=Uncharacterized protein {ECO:0000313|EMBL:ESR58107.1};	ATP-dependent RNA helicase pitchoune	GO:0005524,ATP binding; GO:0016887,ATP hydrolysis activity; GO:0003723,RNA binding; GO:0003724,RNA helicase activity; GO:0000166,nucleotide binding; GO:0003674,molecular_function; GO:0005488,binding; GO:0017076,purine nucleotide binding; GO:0030554,adenyl nucleotide binding; GO:0032553,ribonucleotide binding; GO:0032555,purine ribonucleotide binding; GO:0032559,adenyl ribonucleotide binding; GO:0…	PF00270.32:DEAD/DEAH box helicase	--	--	--
LOC123224690	1	1	1	478	342	153	0.0198	0.0244	0.0178	9.3202	6.9393	3.6339	0.0206666666666667	6.63113333333333	8.32580593879537	3.29388337055933e-16	6.1093964378196e-14	NC_058145.1	17297074	17298933	-	LOC123224690	--	K13691 pathogen-inducible salicylic acid glucosyltransferase [EC:2.4.1.-] | (RefSeq) UDP-glycosyltransferase 74F2-like (A)	--	UDP-glycosyltransferase 83A1-like [Mangifera indica]	U83A1_ARATH RecName: Full=UDP-glycosyltransferase 83A1; EC=2.4.1.-;	V4SAF4_CITCL SubName: Full=Uncharacterized protein {ECO:0000313|EMBL:ESR44523.1};	UDP-glucuronosyl and UDP-glucosyl transferase	GO:0008194,UDP-glycosyltransferase activity; GO:0003674,molecular_function; GO:0003824,catalytic activity; GO:0016740,transferase activity; GO:0016757,glycosyltransferase activity	PF00201.21:UDP-glucoronosyl and UDP-glucosyl transferase	--	--	--
LOC123215855	29	24	27	447	310	229	0.3743	0.3821	0.3138	5.6847	4.1026	3.5475	0.356733333333333	4.44493333333333	3.63924384784113	4.11109390748296e-16	7.58156192435415e-14	NC_058141.1	18670769	18675951	+	LOC123215855	--	K13179 ATP-dependent RNA helicase DDX18/HAS1 [EC:3.6.4.13] | (RefSeq) DEAD-box ATP-dependent RNA helicase 51-like (A)	--	DEAD-box ATP-dependent RNA helicase 31-like isoform X1 [Mangifera indica]	RH31_ARATH RecName: Full=DEAD-box ATP-dependent RNA helicase 31; EC=3.6.4.13;	V4TX15_CITCL SubName: Full=Uncharacterized protein {ECO:0000313|EMBL:ESR58107.1};	ATP-dependent RNA helicase pitchoune	GO:0005524,ATP binding; GO:0016887,ATP hydrolysis activity; GO:0003723,RNA binding; GO:0003724,RNA helicase activity; GO:0000166,nucleotide binding; GO:0003674,molecular_function; GO:0005488,binding; GO:0017076,purine nucleotide binding; GO:0030554,adenyl nucleotide binding; GO:0032553,ribonucleotide binding; GO:0032555,purine ribonucleotide binding; GO:0032559,adenyl ribonucleotide binding; GO:0…	PF00270.32:DEAD/DEAH box helicase	--	--	--
LOC123199090	8304	6537	7080	1735	1452	1263	66.7406	64.7948	51.2285	13.7389	11.965	12.1826	60.9213	12.6288333333333	-2.27023	4.52926696775108e-16	8.26182598513989e-14	NC_058152.1	5031291	5056697	+	LOC123199090	--	K10406 kinesin family member C2/C3 | (RefSeq) kinesin-like protein KIN-14R isoform X1 (A)	ko04814: Motor proteins	kinesin-like protein KIN-14B [Mangifera indica]	KN14B_ARATH RecName: Full=Kinesin-like protein KIN-14B {ECO:0000305}; AltName: Full=Kinesin CDKA-1-associated protein 2 {ECO:0000303|PubMed:15247388}; AltName: Full=Kinesin-like protein KCA2 {ECO:0000303|PubMed:15247388}; AltName: Full=Kinesin-like protein for actin-based chloroplast movement 2 {ECO:0000303|PubMed:20418504};	A0A5C7HTG7_9ROSI RecName: Full=Kinesin motor domain-containing protein {ECO:0000259|PROSITE:PS50067};	Kinesin (KAR3 subfamily)	GO:0005829,cytosol; GO:0005874,microtubule; GO:0015630,microtubule cytoskeleton; GO:0005886,plasma membrane; GO:0005524,ATP binding; GO:0008017,microtubule binding; GO:0003777,microtubule motor activity; GO:0009904,chloroplast accumulation movement; GO:0009903,chloroplast avoidance movement; GO:0007018,microtubule-based movement; GO:0007017,microtubule-based process; GO:0031022,nuclear migration …	PF00225.26:Kinesin motor domain	--	--	--
LOC123203898	73	133	124	1940	1589	975	2.7181	6.1074	4.1567	71.1701	60.6618	43.5698	4.3274	58.4672333333333	3.75605593819324	4.53116598819372e-16	8.26182598513989e-14	NC_058156.1	2522589	2525297	+	LOC123203898	--	K09377 cysteine and glycine-rich protein | (RefSeq) LIM domain-containing protein WLIM1-like (A)	--	LIM domain-containing protein WLIM1-like [Mangifera indica]	WLIM1_ARATH RecName: Full=LIM domain-containing protein WLIM1 {ECO:0000305}; AltName: Full=Widely-expressed LIM protein 1 {ECO:0000303|PubMed:11085265}; Short=AtWLIM1;	A0A067G249_CITSI SubName: Full=Uncharacterized protein {ECO:0000313|EMBL:KDO69762.1};	Regulatory protein MLP and related LIM proteins	GO:0005737,cytoplasm; GO:0005856,cytoskeleton; GO:0005886,plasma membrane; GO:0051015,actin filament binding; GO:0046872,metal ion binding; GO:0003729,mRNA binding; GO:0051017,actin filament bundle assembly; GO:0003674,molecular_function; GO:0003779,actin binding; GO:0005488,binding; GO:0005515,protein binding; GO:0008092,cytoskeletal protein binding; GO:0044877,protein-containing complex binding…	PF00412.25:LIM domain	LIM	TF	LIM
LOC123227326	2795	1522	4589	409	413	296	88.2826	59.288	130.493	12.7282	13.3748	11.2207	92.6878666666667	12.4412333333333	-2.89725	4.66301064274796e-16	8.43616145512262e-14	NC_058146.1	5844519	5847257	-	LOC123227326	--	K01674 carbonic anhydrase [EC:4.2.1.1] | (RefSeq) alpha carbonic anhydrase 1, chloroplastic (A)	ko00910: Nitrogen metabolism; ko01100: Metabolic pathways	alpha carbonic anhydrase 1, chloroplastic [Mangifera indica]	ATCA1_ARATH RecName: Full=Alpha carbonic anhydrase 1, chloroplastic; Short=AtaCA1; Short=AtalphaCA1; EC=4.2.1.1; AltName: Full=Alpha carbonate dehydratase 1; Flags: Precursor;	A0A6M2F9N4_9ROSI RecName: Full=Carbonic anhydrase {ECO:0000256|ARBA:ARBA00012925, ECO:0000256|RuleBase:RU367011}; EC=4.2.1.1 {ECO:0000256|ARBA:ARBA00012925, ECO:0000256|RuleBase:RU367011};	Carbonic anhydrase	GO:0009570,chloroplast stroma; GO:0005783,endoplasmic reticulum; GO:0004089,carbonate dehydratase activity; GO:0016836,hydro-lyase activity; GO:0008270,zinc ion binding; GO:0006730,one-carbon metabolic process; GO:0003674,molecular_function; GO:0003824,catalytic activity; GO:0016829,lyase activity; GO:0016835,carbon-oxygen lyase activity; GO:0005488,binding; GO:0043167,ion binding; GO:0043169,cat…	PF00194.24:Eukaryotic-type carbonic anhydrase	--	--	--
LOC123228242	2048	2343	1575	310	189	194	29.3772	41.4488	20.3394	4.3812	2.7796	3.3398	30.3884666666667	3.5002	-3.11801	4.69927291136149e-16	8.43616145512262e-14	NC_058146.1	2478407	2482140	+	LOC123228242	--	--	--	uncharacterized protein At1g01500-like [Mangifera indica]	Y1015_ARATH RecName: Full=Uncharacterized protein At1g01500;	A0A2H5PYA2_CITUN SubName: Full=Uncharacterized protein {ECO:0000313|EMBL:GAY57311.1};	--	GO:0016021,integral component of membrane; GO:0004617,phosphoglycerate dehydrogenase activity; GO:0003674,molecular_function; GO:0003824,catalytic activity; GO:0016491,oxidoreductase activity; GO:0016614,oxidoreductase activity, acting on CH-OH group of donors; GO:0016616,oxidoreductase activity, acting on the CH-OH group of donors, NAD or NADP as acceptor; GO:0005575,cellular_component; GO:00160…	--	--	--	--
LOC123201990	297	461	373	41	13	18	6.2131	11.8936	7.0249	0.8451	0.2788	0.4519	8.3772	0.525266666666667	-3.99535	4.70519958455077e-16	8.43616145512262e-14	NC_058154.1	3128287	3131453	-	LOC123201990	--	--	--	uncharacterized protein LOC123201990 [Mangifera indica]	PWD_ARATH RecName: Full=Phosphoglucan, water dikinase, chloroplastic; EC=2.7.9.5; Flags: Precursor;	A0A5C7HPU5_9ROSI RecName: Full=CBM20 domain-containing protein {ECO:0000259|PROSITE:PS51166};	--	GO:0009507,chloroplast; GO:0009570,chloroplast stroma; GO:0009536,plastid; GO:0102217,6-phosphoglucan, water dikinase activity; GO:0005524,ATP binding; GO:0019200,carbohydrate kinase activity; GO:0046872,metal ion binding; GO:0051752,phosphoglucan, water dikinase activity; GO:0102219,phosphogluco-amylopectin water dikinase activity; GO:2001070,starch binding; GO:0046777,protein autophosphorylatio…	PF00686.22:Starch binding domain	--	--	--
novel.1044	5179	2239	4431	271	277	419	154.434	82.3398	118.953	7.9619	8.4688	14.9949	118.575433333333	10.4752	-3.50076	4.86715537112192e-16	8.67832625923854e-14	NC_058148.1	14766216	14767395	.	--	--	K08912 light-harvesting complex II chlorophyll a/b binding protein 1 | (RefSeq) chlorophyll a-b binding protein of LHCII type 1-like (A)	ko00196: Photosynthesis - antenna proteins; ko01100: Metabolic pathways	unnamed protein product [Brassica rapa]	CB22_TOBAC RecName: Full=Chlorophyll a-b binding protein 21, chloroplastic; AltName: Full=LHCII type I CAB-21; Short=LHCP; Flags: Precursor;	A0A3P6AT08_BRACM RecName: Full=Chlorophyll a-b binding protein, chloroplastic {ECO:0000256|RuleBase:RU363080};	--	GO:0009535,chloroplast thylakoid membrane; GO:0016021,integral component of membrane; GO:0009522,photosystem I; GO:0009523,photosystem II; GO:0016168,chlorophyll binding; GO:0046872,metal ion binding; GO:0009768,photosynthesis, light harvesting in photosystem I; GO:0009416,response to light stimulus; GO:0003674,molecular_function; GO:0005488,binding; GO:0046906,tetrapyrrole binding; GO:0097159,or…	PF00504.24:Chlorophyll A-B binding protein	--	--	--
novel.379	163	85	215	3	3	7	7.4486	4.7903	8.8451	0.1351	0.1406	0.3839	7.028	0.219866666666667	-4.99841	5.7095626464155e-16	1.01244349059213e-13	NC_058140.1	17192939	17193708	+	--	--	--	--	hypothetical protein CICLE_v10033215mg [Citrus clementina]	--	V4SV37_CITCL SubName: Full=Uncharacterized protein {ECO:0000313|EMBL:ESR51738.1};	--	--	--	--	--	--
LOC123215573	452	355	363	50	58	34	16.1794	15.6716	11.6979	1.7634	2.1286	1.4606	14.5163	1.7842	-3.02432	5.74549293672173e-16	1.01324750572033e-13	NC_058137.1	10648587	10650462	-	LOC123215573	--	--	--	--	--	--	--	--	--	--	--	--
LOC123196122	107	135	97	4325	2183	1191	1.1385	1.7715	0.9292	45.3398	23.8146	15.2086	1.27973333333333	28.121	4.45773277588455	6.12850744106831e-16	1.07492022089999e-13	NC_058150.1	4679304	4687333	+	LOC123196122	--	K03655 ATP-dependent DNA helicase RecG [EC:5.6.2.4] | (RefSeq) ATP-dependent DNA helicase homolog RECG, chloroplastic isoform X1 (A)	ko03440: Homologous recombination	ATP-dependent DNA helicase At3g02060, chloroplastic [Mangifera indica]	Y3206_ARATH RecName: Full=ATP-dependent DNA helicase At3g02060, chloroplastic; EC=3.6.4.12 {ECO:0000305}; Flags: Precursor;	A0A067FJW1_CITSI SubName: Full=Uncharacterized protein {ECO:0000313|EMBL:KDO63506.1};	ATP-dependent RNA helicase	GO:0009507,chloroplast; GO:0005524,ATP binding; GO:0016887,ATP hydrolysis activity; GO:0003677,DNA binding; GO:0003678,DNA helicase activity; GO:0000166,nucleotide binding; GO:0003674,molecular_function; GO:0005488,binding; GO:0017076,purine nucleotide binding; GO:0030554,adenyl nucleotide binding; GO:0032553,ribonucleotide binding; GO:0032555,purine ribonucleotide binding; GO:0032559,adenyl ribo…	PF00271.34:Helicase conserved C-terminal domain	--	--	--
LOC123214132	337	361	363	10	18	28	6.053	7.9967	5.8698	0.177	0.3315	0.6036	6.63983333333333	0.3707	-4.16282	6.57547907481929e-16	1.14708343881969e-13	NC_058140.1	13298219	13300886	+	LOC123214132	--	--	--	F-box protein SKIP23-like [Mangifera indica]	SKI23_ARATH RecName: Full=F-box protein SKIP23; AltName: Full=SKP1-interacting partner 23;	V4RN36_CITCL RecName: Full=F-box domain-containing protein {ECO:0000259|SMART:SM00256};	--	GO:0005634,nucleus; GO:0016567,protein ubiquitination; GO:0006807,nitrogen compound metabolic process; GO:0008150,biological_process; GO:0008152,metabolic process; GO:0019538,protein metabolic process; GO:0032446,protein modification by small protein conjugation; GO:0036211,protein modification process; GO:0043170,macromolecule metabolic process; GO:0043412,macromolecule modification; GO:0044238,…	PF03478.21:Protein of unknown function (DUF295)	--	--	--
LOC123225205	187537	91413	128632	16684	19857	14486	2913.38	1751.37	1799.02	255.364	316.277	270.08	2154.58856666667	280.574	-2.94096	6.89126427191373e-16	1.19570845079286e-13	NC_058145.1	12830451	12833126	-	LOC123225205	--	K03283 heat shock 70kDa protein 1/6/8 | (RefSeq) heat shock cognate 70 kDa protein 2-like (A)	ko03040: Spliceosome; ko04141: Protein processing in endoplasmic reticulum; ko04144: Endocytosis	heat shock cognate 70 kDa protein 2-like [Mangifera indica]	HS704_ARATH RecName: Full=Heat shock 70 kDa protein 4 {ECO:0000303|PubMed:11599561}; AltName: Full=Heat shock cognate 70 kDa protein 4 {ECO:0000303|PubMed:11402207}; AltName: Full=Heat shock cognate protein 70-4 {ECO:0000303|PubMed:11402207}; Short=AtHsc70-4 {ECO:0000303|PubMed:11402207}; AltName: Full=Heat shock protein 70-4 {ECO:0000303|PubMed:11599561}; Short=AtHsp70-4 {ECO:0000303|PubMed:1159…	V4UFD6_CITCL SubName: Full=Uncharacterized protein {ECO:0000313|EMBL:ESR38039.1};	Molecular chaperones HSP70/HSC70, HSP70 superfamily	GO:0005737,cytoplasm; GO:0005829,cytosol; GO:0005794,Golgi apparatus; GO:0005739,mitochondrion; GO:0005634,nucleus; GO:0009505,plant-type cell wall; GO:0000325,plant-type vacuole; GO:0005886,plasma membrane; GO:0005524,ATP binding; GO:0016887,ATP hydrolysis activity; GO:0140662,ATP-dependent protein folding chaperone; GO:0031072,heat shock protein binding; GO:0051787,misfolded protein binding; GO…	PF00012.23:Hsp70 protein	--	--	--
LOC123214017	22	10	35	944	397	312	0.3541	0.1985	0.5072	14.971	6.5518	6.0272	0.353266666666667	9.18333333333333	4.70018838118991	7.12770196191437e-16	1.23011938725595e-13	NC_058140.1	739018	744493	+	LOC123214017	--	--	--	zinc finger protein CONSTANS-LIKE 10 [Mangifera indica]	COLX_ARATH RecName: Full=Putative zinc finger protein At1g68190;	A0A8K0DJ05_9ROSA SubName: Full=Uncharacterized protein {ECO:0000313|EMBL:KAF3431942.1};	--	GO:0005634,nucleus; GO:0003700,DNA-binding transcription factor activity; GO:0008270,zinc ion binding; GO:0006355,regulation of DNA-templated transcription; GO:0003674,molecular_function; GO:0140110,transcription regulator activity; GO:0005488,binding; GO:0043167,ion binding; GO:0043169,cation binding; GO:0046872,metal ion binding; GO:0046914,transition metal ion binding; GO:0006139,nucleobase-co…	PF06203.17:CCT motif	Others	TR	Others
LOC123223585	1637	2255	2286	276	333	291	10.141	17.228	12.7492	1.6846	2.115	2.1635	13.3727333333333	1.9877	-2.75012	7.19047375530156e-16	1.23435191225983e-13	NC_058144.1	6409298	6418698	+	LOC123223585	--	K14489 arabidopsis histidine kinase 2/3/4 (cytokinin receptor) [EC:2.7.13.3] | (RefSeq) histidine kinase 2 (A)	ko04075: Plant hormone signal transduction	histidine kinase 2 [Mangifera indica]	AHK2_ARATH RecName: Full=Histidine kinase 2; EC=2.7.13.3; AltName: Full=Arabidopsis histidine kinase 2; Short=AtHK2; AltName: Full=Protein AUTHENTIC HIS-KINASE 2;	A0A067F5E6_CITSI RecName: Full=Histidine kinase {ECO:0000256|ARBA:ARBA00012438}; EC=2.7.13.3 {ECO:0000256|ARBA:ARBA00012438};	Sensory transduction histidine kinase	GO:0005789,endoplasmic reticulum membrane; GO:0016021,integral component of membrane; GO:0005886,plasma membrane; GO:0009884,cytokinin receptor activity; GO:0042802,identical protein binding; GO:0019900,kinase binding; GO:0000155,phosphorelay sensor kinase activity; GO:0004673,protein histidine kinase activity; GO:0043424,protein histidine kinase binding; GO:0071215,cellular response to abscisic …	PF03924.16:CHASE domain	Others	TR	Others
LOC123224127	333	235	493	3090	2074	2162	4.87	4.2385	6.4909	44.5236	31.0983	37.9466	5.1998	37.8561666666667	2.86400029142725	7.35843004780501e-16	1.2565005975281e-13	NC_058144.1	6145698	6150974	+	LOC123224127	--	--	--	zinc finger protein CONSTANS-LIKE 9-like isoform X2 [Mangifera indica]	COL9_ARATH RecName: Full=Zinc finger protein CONSTANS-LIKE 9;	A0A0B5AIA6_9ROSI SubName: Full=CONSTANS-LIKE 9-1 {ECO:0000313|EMBL:AJD87513.1}; SubName: Full=CONSTANS-LIKE 9-2 {ECO:0000313|EMBL:AJD87514.1};	--	GO:0005634,nucleus; GO:0003700,DNA-binding transcription factor activity; GO:0000976,transcription cis-regulatory region binding; GO:0008270,zinc ion binding; GO:0007623,circadian rhythm; GO:0048579,negative regulation of long-day photoperiodism, flowering; GO:0006355,regulation of DNA-templated transcription; GO:0003674,molecular_function; GO:0140110,transcription regulator activity; GO:0001067,…	PF06203.17:CCT motif	C2C2-CO-like	TF	C2C2->C2C2-CO-like
LOC123205869	787	1127	1078	86	56	113	11.1616	19.7122	13.7641	1.2017	0.8143	1.9234	14.8793	1.31313333333333	-3.50222	7.64017486006153e-16	1.2977440171514e-13	NW_025401110.1	422270	426220	+	LOC123205869	--	--	--	F-box protein At2g26850-like [Mangifera indica]	FB118_ARATH RecName: Full=F-box protein At2g26850;	A0A067ELJ2_CITSI RecName: Full=F-box domain-containing protein {ECO:0000259|PROSITE:PS50181};	--	--	PF00646.36:F-box domain	--	--	--
LOC123194480	1055	648	947	158	165	133	26.4025	19.9999	21.3363	3.8958	4.2337	3.9947	22.5795666666667	4.0414	-2.48209	8.31234341700035e-16	1.40452491673745e-13	NC_058149.1	14552447	14554125	+	LOC123194480	--	K22683 aspartyl protease family protein [EC:3.4.23.-] | (RefSeq) protein ASPARTIC PROTEASE IN GUARD CELL 1-like (A)	--	aspartyl protease family protein At5g10770-like isoform X1 [Mangifera indica]	ASPA_ARATH RecName: Full=Aspartyl protease family protein At5g10770; EC=3.4.23.- {ECO:0000305}; Flags: Precursor;	A0A067FIY7_CITSI RecName: Full=Peptidase A1 domain-containing protein {ECO:0000259|PROSITE:PS51767};	Aspartyl protease	GO:0031225,anchored component of membrane; GO:0005886,plasma membrane; GO:0004190,aspartic-type endopeptidase activity; GO:0006508,proteolysis; GO:0003674,molecular_function; GO:0003824,catalytic activity; GO:0004175,endopeptidase activity; GO:0008233,peptidase activity; GO:0016787,hydrolase activity; GO:0070001,aspartic-type peptidase activity; GO:0140096,catalytic activity, acting on a protein;…	PF14543.9:Xylanase inhibitor N-terminal	--	--	--
LOC123203824	86	78	111	1249	726	569	1.42	1.5884	1.65	20.3192	12.2907	11.2757	1.5528	14.6285333333333	3.23584120286759	8.45462141019099e-16	1.42112498318278e-13	NC_058156.1	12043571	12048140	+	LOC123203824	--	K02350 DNA polymerase zeta [EC:2.7.7.7] | (RefSeq) DNA polymerase zeta catalytic subunit (A)	--	zinc finger protein VAR3, chloroplastic [Mangifera indica]	VAR3_ARATH RecName: Full=Zinc finger protein VAR3, chloroplastic {ECO:0000305}; AltName: Full=Organelle Zinc finger 1 {ECO:0000303|PubMed:25768119}; AltName: Full=Protein VARIEGATED 3 {ECO:0000303|PubMed:15340011}; Flags: Precursor;	A0A5C7H1J2_9ROSI SubName: Full=Uncharacterized protein {ECO:0000313|EMBL:TXG50860.1};	RNA-binding Ran Zn-finger protein and related proteins	GO:0009507,chloroplast; GO:0009570,chloroplast stroma; GO:0005737,cytoplasm; GO:0046872,metal ion binding; GO:0003729,mRNA binding; GO:0003723,RNA binding; GO:1900871,chloroplast mRNA modification; GO:0009658,chloroplast organization; GO:0006397,mRNA processing; GO:0003674,molecular_function; GO:0005488,binding; GO:0043167,ion binding; GO:0043169,cation binding; GO:0003676,nucleic acid binding; G…	PF00641.21:Zn-finger in Ran binding protein and others	--	--	--
LOC123221325	2677	5263	4379	527	455	249	40.8832	99.1262	60.207	7.9297	7.1245	4.5638	66.7388	6.53933333333333	-3.35131	8.50126012998e-16	1.42156045686448e-13	NC_058143.1	17996940	18000261	+	LOC123221325	--	K09489 heat shock 70kDa protein 4 | (RefSeq) heat shock 70 kDa protein 8 isoform X1 (A)	--	heat shock 70 kDa protein 8 isoform X1 [Mangifera indica]	HSP7H_ARATH RecName: Full=Heat shock 70 kDa protein 8; AltName: Full=Heat shock protein 70-8; Short=AtHsp70-8; AltName: Full=Heat-shock protein 70T-2;	A0A6P5X3V7_DURZI SubName: Full=heat shock 70 kDa protein 8 {ECO:0000313|RefSeq:XP_022723042.1, ECO:0000313|RefSeq:XP_022723043.1};	Molecular chaperones HSP70/HSC70, HSP70 superfamily	GO:0005737,cytoplasm; GO:0005524,ATP binding; GO:0016887,ATP hydrolysis activity; GO:0140662,ATP-dependent protein folding chaperone; GO:0031072,heat shock protein binding; GO:0051787,misfolded protein binding; GO:0044183,protein folding chaperone; GO:0051082,unfolded protein binding; GO:0034620,cellular response to unfolded protein; GO:0051085,chaperone cofactor-dependent protein refolding; GO:0…	PF00012.23:Hsp70 protein	--	--	--
LOC123215259	1226	1610	1833	333	170	146	32.6315	52.8484	43.9223	8.7325	4.6392	4.6637	43.1340666666667	6.0118	-2.84296	1.03937289069875e-15	1.72905573719179e-13	NC_058141.1	20087528	20091070	+	LOC123215259	--	--	--	uncharacterized protein LOC123215259 [Mangifera indica]	--	A0A061DU40_THECC SubName: Full=Flower, cultured cell, putative {ECO:0000313|EMBL:EOX96225.1};	--	GO:0005737,cytoplasm; GO:0005575,cellular_component; GO:0005622,intracellular anatomical structure; GO:0110165,cellular anatomical entity	PF10248.12:Myelodysplasia-myeloid leukemia factor 1-interacting protein	--	--	--
LOC123204021	54	91	60	1077	1453	1890	2.292	4.7635	2.2927	45.039	63.2316	96.2765	3.11606666666667	68.1823666666667	4.45160067292057	1.11425074740167e-15	1.84411355748175e-13	NC_058156.1	7239014	7241569	-	LOC123204021	--	--	--	protein NONRESPONDING TO OXYLIPINS 2, mitochondrial-like isoform X2 [Mangifera indica]	NOXY2_ARATH RecName: Full=Protein NONRESPONDING TO OXYLIPINS 2, mitochondrial {ECO:0000303|PubMed:17369372, ECO:0000303|PubMed:23370715}; Flags: Precursor;	A0A067FD99_CITSI SubName: Full=Uncharacterized protein {ECO:0000313|EMBL:KDO61432.1};	--	GO:0005739,mitochondrion; GO:0052543,callose deposition in cell wall; GO:0071433,cell wall repair; GO:0042742,defense response to bacterium; GO:0050832,defense response to fungus; GO:0010311,lateral root formation; GO:0019372,lipoxygenase pathway; GO:0048311,mitochondrion distribution; GO:0031407,oxylipin metabolic process; GO:2000023,regulation of lateral root development; GO:0010821,regulation …	--	--	--	--
LOC123205990	5957	8342	5187	704	409	174	97.4464	168.293	76.3889	11.3464	6.8597	3.416	114.042933333333	7.20736666666667	-3.98396	1.12683742997441e-15	1.85542981518185e-13	NC_058138.1	19436835	19446553	-	LOC123205990	--	K16075 magnesium transporter | (RefSeq) magnesium transporter MRS2-11, chloroplastic (A)	--	magnesium transporter MRS2-11, chloroplastic [Mangifera indica]	MRS2B_ARATH RecName: Full=Magnesium transporter MRS2-11, chloroplastic; AltName: Full=Magnesium Transporter 10; Short=AtMGT10; Flags: Precursor;	V4UEB0_CITCL RecName: Full=Magnesium transporter {ECO:0000256|RuleBase:RU366041};	Magnesium transporters: CorA family	GO:0009507,chloroplast; GO:0009941,chloroplast envelope; GO:0031969,chloroplast membrane; GO:0016021,integral component of membrane; GO:0009536,plastid; GO:0015095,magnesium ion transmembrane transporter activity; GO:0010960,magnesium ion homeostasis; GO:1903830,magnesium ion transmembrane transport; GO:0015693,magnesium ion transport; GO:0010117,photoprotection; GO:0010027,thylakoid membrane org…	PF01544.21:CorA-like Mg2+ transporter protein	--	--	--
LOC123214210	82	258	76	12018	10705	3492	1.9575	7.5956	1.6333	282.659	262.007	100.044	3.7288	214.902966666667	5.84883017063164	1.25353112117377e-15	2.05077023851628e-13	NC_058140.1	17798426	17800145	-	LOC123214210	--	K19371 DnaJ homolog subfamily C member 25 | (RefSeq) chaperone protein dnaJ 50 isoform X1 (A)	--	chaperone protein dnaJ C76, chloroplastic [Mangifera indica]	DJC76_ARATH RecName: Full=Chaperone protein dnaJ C76, chloroplastic {ECO:0000305}; Short=atDjC76 {ECO:0000303|PubMed:23894646}; AltName: Full=AtDjC17 {ECO:0000303|PubMed:25339971}; AltName: Full=AtJ17 {ECO:0000305}; Flags: Precursor;	A0A2H5P3H3_CITUN RecName: Full=J domain-containing protein {ECO:0000259|PROSITE:PS50076};	Molecular chaperone (DnaJ superfamily)	GO:0009507,chloroplast; GO:0005575,cellular_component; GO:0005622,intracellular anatomical structure; GO:0005737,cytoplasm; GO:0009536,plastid; GO:0043226,organelle; GO:0043227,membrane-bounded organelle; GO:0043229,intracellular organelle; GO:0043231,intracellular membrane-bounded organelle; GO:0110165,cellular anatomical entity	PF00226.34:DnaJ domain	--	--	--
LOC123223797	131	44	196	4630	2763	1442	0.855	0.3542	1.1517	29.7741	18.4899	11.2956	0.786966666666667	19.8532	4.65692522473637	1.25818023495251e-15	2.05077023851628e-13	NC_058144.1	5535187	5550448	-	LOC123223797	--	K10357 myosin V | (RefSeq) LOW QUALITY PROTEIN: myosin-6-like (A)	ko04814: Motor proteins	LOW QUALITY PROTEIN: myosin-6-like [Mangifera indica]	MYO8_ARATH RecName: Full=Myosin-8; AltName: Full=Myosin XI B; Short=AtXIB;	V4VUK2_CITCL SubName: Full=Uncharacterized protein {ECO:0000313|EMBL:ESR56934.1};	Myosin class V heavy chain	GO:0015629,actin cytoskeleton; GO:0005737,cytoplasm; GO:0016459,myosin complex; GO:0051015,actin filament binding; GO:0005524,ATP binding; GO:0005516,calmodulin binding; GO:0003774,cytoskeletal motor activity; GO:0000146,microfilament motor activity; GO:0007015,actin filament organization; GO:0030048,actin filament-based movement; GO:0048767,root hair elongation; GO:0030050,vesicle transport alon…	PF00063.24:Myosin head (motor domain)	--	--	--
LOC123226440	235	149	260	1733	1501	1794	4.1573	3.2508	4.1409	30.2059	27.2251	38.0891	3.84966666666667	31.8400333333333	3.04803640938888	1.2706417528428e-15	2.06067443665808e-13	NC_058145.1	15321222	15328576	+	LOC123226440	--	K17839 polyamine oxidase [EC:1.5.3.17 1.5.3.-] | (RefSeq) probable polyamine oxidase 4 (A)	ko00330: Arginine and proline metabolism; ko00410: beta-Alanine metabolism; ko00770: Pantothenate and CoA biosynthesis; ko01100: Metabolic pathways	probable polyamine oxidase 4 [Mangifera indica]	PAO4_ARATH RecName: Full=Probable polyamine oxidase 4 {ECO:0000303|PubMed:18703589}; Short=AtPAO4 {ECO:0000303|PubMed:18703589}; EC=1.5.3.16 {ECO:0000269|PubMed:18703589}; AltName: Full=Amine oxidase 2 {ECO:0000312|EMBL:AAO85405.1};	A0A067EQD2_CITSI RecName: Full=Amino_oxidase domain-containing protein {ECO:0000259|Pfam:PF01593};	Amine oxidase	GO:0005777,peroxisome; GO:0052895,N1-acetylspermine:oxygen oxidoreductase (N1-acetylspermidine-forming) activity; GO:0052894,norspermine:oxygen oxidoreductase activity; GO:0016491,oxidoreductase activity; GO:0046592,polyamine oxidase activity; GO:0052902,spermidine:oxygen oxidoreductase (3-aminopropanal-forming) activity; GO:0052901,spermine:oxygen oxidoreductase (spermidine-forming) activity; GO…	PF01593.27:Flavin containing amine oxidoreductase	--	--	--
LOC123219391	4545	5007	4492	740	812	741	115.219	156.54	102.519	18.4829	21.1052	22.5446	124.759	20.7109	-2.59069	1.31421529599988e-15	2.12068351239021e-13	NC_058142.1	2705152	2707356	-	LOC123219391	--	K09510 DnaJ homolog subfamily B member 4 | (RefSeq) dnaJ protein homolog 1-like (A)	--	dnaJ protein homolog 1-like [Mangifera indica]	DNJH_CUCSA RecName: Full=DnaJ protein homolog; AltName: Full=DNAJ-1; Flags: Precursor;	A0A061GF55_THECC SubName: Full=DNAJ heat shock family protein {ECO:0000313|EMBL:EOY28166.1};	Molecular chaperone (DnaJ superfamily)	GO:0005886,plasma membrane; GO:0005524,ATP binding; GO:0030544,Hsp70 protein binding; GO:0046872,metal ion binding; GO:0051082,unfolded protein binding; GO:0006457,protein folding; GO:0009408,response to heat; GO:0000166,nucleotide binding; GO:0003674,molecular_function; GO:0005488,binding; GO:0017076,purine nucleotide binding; GO:0030554,adenyl nucleotide binding; GO:0032553,ribonucleotide bindi…	PF01556.21:DnaJ C terminal domain	--	--	--
LOC123200206	220	343	221	12	15	18	4.0193	7.7281	3.6349	0.216	0.281	0.3947	5.12743333333333	0.297233333333333	-4.10857	1.45609340116386e-15	2.33793543959011e-13	NC_058153.1	117843	120337	-	LOC123200206	--	--	--	uncharacterized protein LOC123200206 [Mangifera indica]	--	A0A5C7HYZ3_9ROSI SubName: Full=Uncharacterized protein {ECO:0000313|EMBL:TXG62170.1};	--	GO:0005634,nucleus; GO:0003712,transcription coregulator activity; GO:0003674,molecular_function; GO:0140110,transcription regulator activity; GO:0005575,cellular_component; GO:0005622,intracellular anatomical structure; GO:0043226,organelle; GO:0043227,membrane-bounded organelle; GO:0043229,intracellular organelle; GO:0043231,intracellular membrane-bounded organelle; GO:0110165,cellular anatomic…	--	--	--	--
LOC123226400	98	132	177	1351	944	1077	1.646	2.7342	2.6764	22.3562	16.2559	21.7092	2.3522	20.1071	3.09562238189487	1.9768409632934e-15	3.15834596081029e-13	NC_058145.1	17557262	17560975	-	LOC123226400	--	K13424 WRKY transcription factor 33 | (RefSeq) probable WRKY transcription factor 25 (A)	ko04016: MAPK signaling pathway - plant; ko04626: Plant-pathogen interaction	probable WRKY transcription factor 3 [Mangifera indica]	WRKY3_ARATH RecName: Full=Probable WRKY transcription factor 3; AltName: Full=WRKY DNA-binding protein 3;	A0A067FZC2_CITSI SubName: Full=Uncharacterized protein {ECO:0000313|EMBL:KDO72709.1};	--	GO:0005634,nucleus; GO:0003700,DNA-binding transcription factor activity; GO:0000976,transcription cis-regulatory region binding; GO:0003674,molecular_function; GO:0140110,transcription regulator activity; GO:0001067,transcription regulatory region nucleic acid binding; GO:0003676,nucleic acid binding; GO:0003677,DNA binding; GO:0003690,double-stranded DNA binding; GO:0005488,binding; GO:0043565,…	PF03106.18:WRKY DNA -binding domain	WRKY	TF	WRKY
LOC123223865	301	389	633	17016	10714	3438	3.7989	6.0547	7.1923	211.589	138.638	52.0746	5.68196666666667	134.100333333333	4.56077864516752	2.16383857832026e-15	3.44007696739556e-13	NC_058144.1	9218638	9222597	-	LOC123223865	--	--	--	uncharacterized protein LOC123223865 [Mangifera indica]	--	A0A067DEW7_CITSI SubName: Full=Uncharacterized protein {ECO:0000313|EMBL:KDO41388.1};	FOG: Ankyrin repeat	--	PF12796.10:Ankyrin repeats (3 copies)	--	--	--
LOC123219977	137	163	204	2608	1599	1033	3.5629	5.2279	4.7762	66.8248	42.6357	32.2415	4.52233333333333	47.234	3.38468647528027	2.27029202450487e-15	3.59162424053164e-13	NC_058137.1	27942181	27945003	-	LOC123219977	--	K03687 molecular chaperone GrpE | (RefSeq) grpE protein homolog 1, mitochondrial-like (A)	--	grpE protein homolog 1, mitochondrial-like [Mangifera indica]	MGE1_ARATH RecName: Full=GrpE protein homolog 1, mitochondrial {ECO:0000303|PubMed:22128139}; Flags: Precursor;	A0A067F7L5_CITSI RecName: Full=GrpE protein homolog {ECO:0000256|RuleBase:RU000640};	Molecular chaperone of the GrpE family	GO:0005739,mitochondrion; GO:0001405,PAM complex, Tim23 associated import motor; GO:0000774,adenyl-nucleotide exchange factor activity; GO:0005524,ATP binding; GO:0051087,chaperone binding; GO:0005507,copper ion binding; GO:0042803,protein homodimerization activity; GO:0051082,unfolded protein binding; GO:0006457,protein folding; GO:0030150,protein import into mitochondrial matrix; GO:0009411,res…	PF01025.22:GrpE	--	--	--
LOC123227711	358	311	415	2200	1990	1762	4.074	4.3647	4.2517	24.6667	23.2186	24.0646	4.23013333333333	23.9833	2.5032551383453	2.40108833034279e-15	3.78001578951966e-13	NC_058146.1	4000358	4004694	-	LOC123227711	--	K12843 U4/U6 small nuclear ribonucleoprotein PRP3 | (RefSeq) protein RDM16-like isoform X1 (A)	ko03040: Spliceosome	protein RDM16-like isoform X1 [Mangifera indica]	RDM16_ARATH RecName: Full=Protein RDM16 {ECO:0000303|PubMed:24068953}; AltName: Full=Pre-mRNA-splicing factor RDM16 {ECO:0000305}; AltName: Full=Protein RNA-directed DNA methylation 16 {ECO:0000303|PubMed:24068953};	A0A5C7GY31_9ROSI RecName: Full=Protein kinase domain-containing protein {ECO:0000259|PROSITE:PS50011};	Putative u4/u6 small nuclear ribonucleoprotein	GO:0005654,nucleoplasm; GO:0046540,U4/U6 x U5 tri-snRNP complex; GO:0009793,embryo development ending in seed dormancy; GO:0006397,mRNA processing; GO:0000398,mRNA splicing, via spliceosome; GO:0044030,regulation of DNA methylation; GO:0000003,reproduction; GO:0003006,developmental process involved in reproduction; GO:0007275,multicellular organism development; GO:0008150,biological_process; GO:0…	PF08572.13:pre-mRNA processing factor 3 (PRP3)	--	--	--
LOC123196993	38	36	41	670	345	329	0.5924	0.6922	0.5754	10.2913	5.5146	6.1557	0.62	7.32053333333333	3.56160863846083	2.52320619354517e-15	3.95298220797492e-13	NC_058150.1	3441988	3445536	+	LOC123196993	--	K01148 poly(A)-specific ribonuclease [EC:3.1.13.4] | (RefSeq) uncharacterized CRM domain-containing protein At3g25440, chloroplastic isoform X1 (A)	ko03018: RNA degradation	CRM-domain containing factor CFM9, mitochondrial [Mangifera indica]	CFM9_ARATH RecName: Full=CRM-domain containing factor CFM9, mitochondrial {ECO:0000305}; AltName: Full=Protein CRM FAMILY MEMBER 9 {ECO:0000303|PubMed:31359042}; Flags: Precursor;	A0A5C7HC89_9ROSI SubName: Full=Uncharacterized protein {ECO:0000313|EMBL:TXG54733.1};	Poly(A)-specific exoribonuclease PARN	GO:0005739,mitochondrion; GO:0003723,RNA binding; GO:0000373,Group II intron splicing; GO:0140040,mitochondrial polycistronic RNA processing; GO:0009737,response to abscisic acid; GO:0009651,response to salt stress; GO:0009414,response to water deprivation; GO:0003674,molecular_function; GO:0003676,nucleic acid binding; GO:0005488,binding; GO:0097159,organic cyclic compound binding; GO:1901363,he…	PF01985.24:CRS1 / YhbY (CRM) domain	--	--	--
LOC123220065	386	404	616	3616	3069	2129	11.3944	14.7076	16.3704	105.167	92.8846	75.4245	14.1574666666667	91.1587333333333	2.68681774519359	2.77373568922145e-15	4.32448173421469e-13	NC_058143.1	14305145	14306469	+	LOC123220065	--	--	--	uncharacterized protein LOC123220065 [Mangifera indica]	--	A0A6P4AMT5_ZIZJJ SubName: Full=uncharacterized protein LOC107432685 {ECO:0000313|RefSeq:XP_015899358.1};	--	GO:0016021,integral component of membrane; GO:0005575,cellular_component; GO:0016020,membrane; GO:0031224,intrinsic component of membrane; GO:0110165,cellular anatomical entity	--	--	--	--
LOC123192376	21	16	20	374	209	199	0.511	0.4802	0.4381	8.9667	5.2144	5.8116	0.476433333333333	6.66423333333333	3.80609265533064	2.86208901885036e-15	4.44077879352681e-13	NC_058148.1	12903667	12905112	-	LOC123192376	--	--	--	pentatricopeptide repeat-containing protein At3g13160, mitochondrial-like isoform X1 [Mangifera indica]	PP226_ARATH RecName: Full=Pentatricopeptide repeat-containing protein At3g13160, mitochondrial; Flags: Precursor;	A0A067GAJ1_CITSI SubName: Full=Uncharacterized protein {ECO:0000313|EMBL:KDO75635.1};	FOG: PPR repeat	GO:0005829,cytosol; GO:0005739,mitochondrion; GO:0003729,mRNA binding; GO:0003674,molecular_function; GO:0003676,nucleic acid binding; GO:0003723,RNA binding; GO:0005488,binding; GO:0097159,organic cyclic compound binding; GO:1901363,heterocyclic compound binding; GO:0005575,cellular_component; GO:0005622,intracellular anatomical structure; GO:0005737,cytoplasm; GO:0110165,cellular anatomical ent…	PF13041.9:PPR repeat family	--	--	--
LOC123194565	711	629	713	120	71	110	20.8829	22.7841	18.8533	3.4726	2.1381	3.8775	20.8401	3.16273333333333	-2.72012	2.96648302486179e-15	4.58073237614184e-13	NC_058149.1	12691850	12695431	-	LOC123194565	--	K06268 serine/threonine-protein phosphatase 2B regulatory subunit | (RefSeq) calcineurin B-like protein 10 isoform X1 (A)	--	calcineurin B-like protein 10 isoform X1 [Mangifera indica]	CNBL9_ORYSJ RecName: Full=Calcineurin B-like protein 9;	V4UDB4_CITCL SubName: Full=Uncharacterized protein {ECO:0000313|EMBL:ESR64062.1};	Ca2+/calmodulin-dependent protein phosphatase (calcineurin subunit B), EF-Hand superfamily protein	GO:0016020,membrane; GO:0005509,calcium ion binding; GO:0019900,kinase binding; GO:0019722,calcium-mediated signaling; GO:0003674,molecular_function; GO:0005488,binding; GO:0043167,ion binding; GO:0043169,cation binding; GO:0046872,metal ion binding; GO:0005515,protein binding; GO:0019899,enzyme binding; GO:0007154,cell communication; GO:0007165,signal transduction; GO:0008150,biological_process;…	PF00036.35:EF hand	--	--	--
LOC123213968	23313	20055	18083	4080	3849	2567	983.582	1043.5	686.845	169.598	166.496	129.979	904.643833333333	155.358	-2.54175	3.14842081597767e-15	4.83852309495464e-13	NC_058140.1	19562256	19563089	+	LOC123213968	--	K02723 photosystem II PsbY protein | (RefSeq) photosystem II core complex proteins psbY, chloroplastic-like (A)	ko00195: Photosynthesis; ko01100: Metabolic pathways	photosystem II core complex proteins psbY, chloroplastic-like [Mangifera indica]	PSBY_SPIOL RecName: Full=Photosystem II core complex proteins psbY, chloroplastic; AltName: Full=L-arginine-metabolizing enzyme; Short=L-AME; Contains: RecName: Full=Photosystem II protein psbY-1, chloroplastic; AltName: Full=psbY-A1; Contains: RecName: Full=Photosystem II protein psbY-2, chloroplastic; AltName: Full=psbY-A2; Flags: Precursor;	A9PJ80_9ROSI SubName: Full=Uncharacterized protein {ECO:0000313|EMBL:ABK96433.1};	--	GO:0009535,chloroplast thylakoid membrane; GO:0016021,integral component of membrane; GO:0009523,photosystem II; GO:0030145,manganese ion binding; GO:0015979,photosynthesis; GO:0003674,molecular_function; GO:0005488,binding; GO:0043167,ion binding; GO:0043169,cation binding; GO:0046872,metal ion binding; GO:0046914,transition metal ion binding; GO:0008150,biological_process; GO:0008152,metabolic …	PF06298.14:Photosystem II protein Y (PsbY)	--	--	--
LOC123224105	149	293	127	7942	7129	2735	2.1673	5.2562	1.6631	113.821	106.32	47.7457	3.02886666666667	89.2955666666667	4.88173857445168	3.37943465274911e-15	5.16893339090862e-13	NC_058144.1	10893948	10897349	-	LOC123224105	--	K20989 urea-proton symporter | (RefSeq) urea-proton symporter DUR3-like (A)	--	urea-proton symporter DUR3-like [Mangifera indica]	DUR3_ARATH RecName: Full=Urea-proton symporter DUR3; Short=AtDUR3; AltName: Full=High-affinity urea active transporter DUR3;	V4SYZ4_CITCL SubName: Full=Uncharacterized protein {ECO:0000313|EMBL:ESR46047.1};	Urea transporter	GO:0016021,integral component of membrane; GO:0005886,plasma membrane; GO:0015293,symporter activity; GO:0015204,urea transmembrane transporter activity; GO:0006995,cellular response to nitrogen starvation; GO:0071918,urea transmembrane transport; GO:0003674,molecular_function; GO:0005215,transporter activity; GO:0015291,secondary active transmembrane transporter activity; GO:0022804,active trans…	PF00474.20:Sodium:solute symporter family	--	--	--
LOC123196279	7	10	22	291	194	200	0.1034	0.1823	0.2927	4.237	2.9394	3.5472	0.1928	3.57453333333333	4.21257794908973	3.41017784060133e-15	5.19135233253427e-13	NC_058150.1	5891690	5894804	-	LOC123196279	--	K14763 H/ACA ribonucleoprotein complex non-core subunit NAF1 | (RefSeq) uncharacterized protein LOC123196279 (A)	--	uncharacterized protein LOC123196279 [Mangifera indica]	--	A0A2H5PTM5_CITUN RecName: Full=H/ACA ribonucleoprotein complex non-core subunit NAF1 {ECO:0000256|ARBA:ARBA00021438};	Uncharacterized conserved protein	GO:0005634,nucleus; GO:0005732,sno(s)RNA-containing ribonucleoprotein complex; GO:0003723,RNA binding; GO:0000493,box H/ACA snoRNP assembly; GO:0001522,pseudouridine synthesis; GO:0042254,ribosome biogenesis; GO:0003674,molecular_function; GO:0003676,nucleic acid binding; GO:0005488,binding; GO:0097159,organic cyclic compound binding; GO:1901363,heterocyclic compound binding; GO:0000491,small nuc…	PF04410.17:Gar1/Naf1 RNA binding region	--	--	--
LOC123218217	29	29	32	449	269	256	0.4634	0.5715	0.4603	7.069	4.4072	4.9095	0.4984	5.4619	3.45402692707596	3.6533933220883e-15	5.53549120581013e-13	NC_058142.1	8357790	8363443	-	LOC123218217	--	K04077 chaperonin GroEL [EC:5.6.1.7] | (RefSeq) chaperonin CPN60-like 2, mitochondrial isoform X1 (A)	ko03018: RNA degradation	chaperonin CPN60-like 2, mitochondrial isoform X1 [Mangifera indica]	CH60C_ARATH RecName: Full=Chaperonin CPN60-like 2, mitochondrial; AltName: Full=HSP60-like 2; Flags: Precursor;	A0A7J7DYL6_TRIWF SubName: Full=Chaperonin CPN60-like 2 mitochondrial isoform X2 {ECO:0000313|EMBL:KAF5751284.1};	Mitochondrial chaperonin, Cpn60/Hsp60p	GO:0005829,cytosol; GO:0005739,mitochondrion; GO:0000325,plant-type vacuole; GO:0005524,ATP binding; GO:0140662,ATP-dependent protein folding chaperone; GO:0006457,protein folding; GO:0042026,protein refolding; GO:0000166,nucleotide binding; GO:0003674,molecular_function; GO:0005488,binding; GO:0017076,purine nucleotide binding; GO:0030554,adenyl nucleotide binding; GO:0032553,ribonucleotide bind…	PF00118.27:TCP-1/cpn60 chaperonin family	--	--	--
LOC123226898	911	715	1109	5848	7663	6872	47.489	45.9663	52.0454	300.353	409.56	429.925	48.5002333333333	379.945833333333	2.96973016338193	3.68558955604577e-15	5.55817905337687e-13	NC_058146.1	5414098	5414886	+	LOC123226898	--	--	--	protein EARLY RESPONSIVE TO DEHYDRATION 15-like [Mangifera indica]	ERD15_SOYBN RecName: Full=Protein EARLY RESPONSIVE TO DEHYDRATION 15 {ECO:0000303|PubMed:21482825}; Short=GmERD15 {ECO:0000303|PubMed:21482825};	A0A067E1T5_CITSI SubName: Full=Uncharacterized protein {ECO:0000313|EMBL:KDO44846.1};	--	GO:0005634,nucleus; GO:0003677,DNA binding; GO:0045893,positive regulation of DNA-templated transcription; GO:0003674,molecular_function; GO:0003676,nucleic acid binding; GO:0005488,binding; GO:0097159,organic cyclic compound binding; GO:1901363,heterocyclic compound binding; GO:0006139,nucleobase-containing compound metabolic process; GO:0006351,DNA-templated transcription; GO:0006355,regulation…	PF07145.18:Ataxin-2 C-terminal region	--	--	--
LOC123205303	1049	694	774	161	126	81	9.8219	8.0138	6.5244	1.4852	1.2096	0.9102	8.12003333333333	1.20166666666667	-2.75645	4.33712476223426e-15	6.51032685821332e-13	NW_025401095.1	463153	506569	-	LOC123205303	--	K14760 o-succinylbenzoate---CoA ligase [EC:6.2.1.26] | (RefSeq) 2-succinylbenzoate--CoA ligase, chloroplastic/peroxisomal-like isoform X1 (A)	ko00130: Ubiquinone and other terpenoid-quinone biosynthesis; ko01100: Metabolic pathways; ko01110: Biosynthesis of secondary metabolites; ko01240: Biosynthesis of cofactors	2-succinylbenzoate--CoA ligase, chloroplastic/peroxisomal-like isoform X1 [Mangifera indica]	MENE_ARATH RecName: Full=2-succinylbenzoate--CoA ligase, chloroplastic/peroxisomal; EC=6.2.1.26; AltName: Full=Acyl-activating enzyme 14; AltName: Full=O-succinylbenzoyl-CoA ligase; Flags: Precursor;	A0A5C7GUV7_9ROSI SubName: Full=Uncharacterized protein {ECO:0000313|EMBL:TXG48122.1};	Long chain fatty acid acyl-CoA ligase	GO:0009507,chloroplast; GO:0031969,chloroplast membrane; GO:0016021,integral component of membrane; GO:0005778,peroxisomal membrane; GO:0005777,peroxisome; GO:0005524,ATP binding; GO:0031956,medium-chain fatty acid-CoA ligase activity; GO:0008756,o-succinylbenzoate-CoA ligase activity; GO:0006631,fatty acid metabolic process; GO:0042372,phylloquinone biosynthetic process; GO:0000166,nucleotide bi…	PF00501.31:AMP-binding enzyme	--	--	--
LOC123223635	377	749	681	51	53	61	15.0231	36.8094	24.431	2.0023	2.1654	2.9173	25.4211666666667	2.36166666666667	-3.42815	4.86770029576016e-15	7.27293016875314e-13	NC_058144.1	5261890	5263108	+	LOC123223635	--	--	--	uncharacterized protein LOC123223635 [Mangifera indica]	--	A0A067FF20_CITSI SubName: Full=Uncharacterized protein {ECO:0000313|EMBL:KDO65958.1};	--	--	--	--	--	--
LOC123198593	13	28	31	587	353	276	0.1439	0.3822	0.3089	6.4014	4.006	3.6663	0.278333333333333	4.69123333333333	4.07508165764299	4.9581509331472e-15	7.37393571730228e-13	NC_058152.1	2124442	2132111	+	LOC123198593	--	K01354 oligopeptidase B [EC:3.4.21.83] | (RefSeq) protease 2 (A)	--	dipeptidyl aminopeptidase BI isoform X1 [Mangifera indica]	--	A0A5C7HT94_9ROSI RecName: Full=Prolyl endopeptidase {ECO:0000256|RuleBase:RU368024}; EC=3.4.21.- {ECO:0000256|RuleBase:RU368024};	Predicted serine protease	GO:0004252,serine-type endopeptidase activity; GO:0006508,proteolysis; GO:0003674,molecular_function; GO:0003824,catalytic activity; GO:0004175,endopeptidase activity; GO:0008233,peptidase activity; GO:0008236,serine-type peptidase activity; GO:0016787,hydrolase activity; GO:0017171,serine hydrolase activity; GO:0140096,catalytic activity, acting on a protein; GO:0006807,nitrogen compound metabol…	PF02897.18:Prolyl oligopeptidase, N-terminal beta-propeller domain	--	--	--
LOC123224893	0	1	5	296	277	113	0	0.0253	0.0925	5.9905	5.8337	2.7857	0.0392666666666667	4.86996666666667	6.95446295400459	5.10920998165961e-15	7.56374007972938e-13	NC_058145.1	17284628	17286422	-	LOC123224893	--	K13691 pathogen-inducible salicylic acid glucosyltransferase [EC:2.4.1.-] | (RefSeq) UDP-glycosyltransferase 74F2-like (A)	--	UDP-glycosyltransferase 83A1-like [Mangifera indica]	U83A1_ARATH RecName: Full=UDP-glycosyltransferase 83A1; EC=2.4.1.-;	V4SAF4_CITCL SubName: Full=Uncharacterized protein {ECO:0000313|EMBL:ESR44523.1};	UDP-glucuronosyl and UDP-glucosyl transferase	GO:0008194,UDP-glycosyltransferase activity; GO:0003674,molecular_function; GO:0003824,catalytic activity; GO:0016740,transferase activity; GO:0016757,glycosyltransferase activity	PF00201.21:UDP-glucoronosyl and UDP-glucosyl transferase	--	--	--
LOC123198427	1013	915	1390	340	230	240	16.861	18.7825	20.8288	5.5757	3.9251	4.7942	18.8241	4.765	-1.98203	5.62392378917098e-15	8.28771198392306e-13	NC_058151.1	1999833	2007539	+	LOC123198427	--	K19882 O-palmitoleoyl-L-serine hydrolase [EC:3.1.1.98] | (RefSeq) pectin acetylesterase 9 (A)	--	pectin acetylesterase 9 [Mangifera indica]	PAE9_ARATH RecName: Full=Pectin acetylesterase 9 {ECO:0000303|PubMed:25115560}; EC=3.1.1.- {ECO:0000305}; Flags: Precursor;	A0A2H5NLT8_CITUN RecName: Full=Pectin acetylesterase {ECO:0000256|RuleBase:RU363114}; EC=3.1.1.- {ECO:0000256|RuleBase:RU363114};	Pectin acetylesterase and similar proteins	GO:0005576,extracellular region; GO:0052793,pectin acetylesterase activity; GO:0071555,cell wall organization; GO:0003674,molecular_function; GO:0003824,catalytic activity; GO:0016787,hydrolase activity; GO:0016788,hydrolase activity, acting on ester bonds; GO:0052689,carboxylic ester hydrolase activity; GO:0008150,biological_process; GO:0009987,cellular process; GO:0016043,cellular component org…	PF03283.16:Pectinacetylesterase	--	--	--
LOC123197634	1877	245	2163	24	45	33	42.2556	6.8021	43.8381	0.5323	1.0387	0.8916	30.9652666666667	0.820866666666667	-5.23736	5.85473814753616e-15	8.58863473797429e-13	NC_058151.1	12032686	12038305	-	LOC123197634	--	K23877 xyloglucan O-acetyltransferase | (RefSeq) protein ALTERED XYLOGLUCAN 4-like (A)	--	protein trichome birefringence-like 19 [Mangifera indica]	TBL19_ARATH RecName: Full=Protein trichome birefringence-like 19;	V4STL0_CITCL RecName: Full=PMR5N domain-containing protein {ECO:0000259|Pfam:PF14416};	--	GO:0005794,Golgi apparatus; GO:0016021,integral component of membrane; GO:0016413,O-acetyltransferase activity; GO:0003674,molecular_function; GO:0003824,catalytic activity; GO:0008374,O-acyltransferase activity; GO:0016407,acetyltransferase activity; GO:0016740,transferase activity; GO:0016746,acyltransferase activity; GO:0016747,acyltransferase activity, transferring groups other than amino-acy…	PF13839.9:GDSL/SGNH-like Acyl-Esterase family found in Pmr5 and Cas1p	--	--	--
LOC123196443	320	388	331	6434	3995	2450	3.6522	5.4613	3.401	72.3494	46.7483	33.5587	4.1715	50.8854666666667	3.60861551831999	6.05479442885413e-15	8.84191767431717e-13	NC_058150.1	1267113	1273493	+	LOC123196443	--	K01148 poly(A)-specific ribonuclease [EC:3.1.13.4] | (RefSeq) uncharacterized CRM domain-containing protein At3g25440, chloroplastic isoform X1 (A)	ko03018: RNA degradation	CRM-domain containing factor CFM3, chloroplastic/mitochondrial isoform X1 [Mangifera indica]	CFM3_MAIZE RecName: Full=CRM-domain containing factor CFM3, chloroplastic/mitochondrial {ECO:0000305}; AltName: Full=Protein CRM FAMILY MEMBER 3 {ECO:0000303|PubMed:18799595}; Short=ZmCFM3 {ECO:0000303|PubMed:18799595}; Flags: Precursor;	A0A2H5PM28_CITUN SubName: Full=Uncharacterized protein {ECO:0000313|EMBL:GAY53410.1};	Poly(A)-specific exoribonuclease PARN	GO:0009507,chloroplast; GO:0009570,chloroplast stroma; GO:0005739,mitochondrion; GO:0003729,mRNA binding; GO:0000373,Group II intron splicing; GO:0006397,mRNA processing; GO:0003674,molecular_function; GO:0003676,nucleic acid binding; GO:0003723,RNA binding; GO:0005488,binding; GO:0097159,organic cyclic compound binding; GO:1901363,heterocyclic compound binding; GO:0000375,RNA splicing, via trans…	PF01985.24:CRS1 / YhbY (CRM) domain	--	--	--
LOC123195209	784	627	1134	4953	4986	4646	13.7109	13.5231	17.8542	85.343	89.402	97.5134	15.0294	90.7528	2.59415473983825	6.69199787840041e-15	9.72841655538813e-13	NC_058149.1	12620744	12622755	+	LOC123195209	--	K21737 acyl-lipid Delta6-acetylenase / acyl-lipid (9-3)-desaturase [EC:1.14.19.38 1.14.19.47] | (RefSeq) acyl-lipid (9-3)-desaturase-like (A)	--	acyl-lipid (9-3)-desaturase-like [Mangifera indica]	DES6_BOROF RecName: Full=Acyl-lipid (9-3)-desaturase {ECO:0000303|PubMed:9108131}; Short=BoDes6 {ECO:0000303|PubMed:9108131}; EC=1.14.19.47 {ECO:0000269|PubMed:9108131};	A0A067GXE4_CITSI RecName: Full=Cytochrome b5 heme-binding domain-containing protein {ECO:0000259|PROSITE:PS50255};	Delta 6-fatty acid desaturase/delta-8 sphingolipid desaturase	GO:0005789,endoplasmic reticulum membrane; GO:0016021,integral component of membrane; GO:0046872,metal ion binding; GO:0016491,oxidoreductase activity; GO:0006636,unsaturated fatty acid biosynthetic process; GO:0003674,molecular_function; GO:0005488,binding; GO:0043167,ion binding; GO:0043169,cation binding; GO:0003824,catalytic activity; GO:0006082,organic acid metabolic process; GO:0006629,lipi…	PF00487.27:Fatty acid desaturase	--	--	--
LOC123200152	17	23	51	656	549	282	0.3679	0.6138	0.9936	13.9866	12.1808	7.3239	0.658433333333333	11.1637666666667	4.08364269154464	6.96429839821695e-15	1.00788700540653e-12	NC_058138.1	15774617	15776242	+	LOC123200152	--	--	--	probable polyamine transporter At3g13620 [Mangifera indica]	PHSC_ARATH RecName: Full=Probable polyamine transporter At3g13620;	A0A2N9J6I7_FAGSY SubName: Full=Uncharacterized protein {ECO:0000313|EMBL:SPD32214.1};	Amino acid transporters	GO:0016021,integral component of membrane; GO:0005886,plasma membrane; GO:0015203,polyamine transmembrane transporter activity; GO:0015293,symporter activity; GO:0015846,polyamine transport; GO:0003674,molecular_function; GO:0005215,transporter activity; GO:0022857,transmembrane transporter activity; GO:0015291,secondary active transmembrane transporter activity; GO:0022804,active transmembrane t…	PF13520.9:Amino acid permease	--	--	--
LOC123222892	338	354	332	3099	4193	4818	9.1768	11.8532	8.115	82.898	116.719	156.991	9.715	118.869433333333	3.61301997508832	7.56543442998858e-15	1.08999672035277e-12	NC_058144.1	9229186	9231741	+	LOC123222892	--	K17080 prohibitin 1 | (RefSeq) prohibitin-3, mitochondrial (A)	--	prohibitin-3, mitochondrial [Mangifera indica]	PHB3_ARATH RecName: Full=Prohibitin-3, mitochondrial; Short=Atphb3; AltName: Full=Protein ENHANCED ETHYLENE RESPONSE 3;	A0A067DIK0_CITSI RecName: Full=Prohibitin {ECO:0000256|RuleBase:RU366048};	Prohibitin	GO:0009507,chloroplast; GO:0009941,chloroplast envelope; GO:0005747,mitochondrial respiratory chain complex I; GO:0005739,mitochondrion; GO:0005730,nucleolus; GO:0000325,plant-type vacuole; GO:0005886,plasma membrane; GO:0044877,protein-containing complex binding; GO:0051301,cell division; GO:0042742,defense response to bacterium; GO:0048527,lateral root development; GO:0007005,mitochondrion orga…	PF01145.28:SPFH domain / Band 7 family	--	--	--
LOC123200340	154	144	192	16	19	19	8.0877	9.3266	9.0778	0.8279	1.0231	1.1975	8.8307	1.01616666666667	-3.11939	7.63404167684069e-15	1.09499300905191e-12	NC_058153.1	1646208	1646982	+	LOC123200340	--	K13120 protein FAM32A | (RefSeq) uncharacterized protein LOC123200340 isoform X1 (A)	--	uncharacterized protein LOC123200340 isoform X1 [Mangifera indica]	--	A0A314LCQ5_NICAT SubName: Full=Uncharacterized protein {ECO:0000313|EMBL:OIT39323.1};	Conserved alpha-helical protein	--	PF08555.13:FAM32A	--	--	--
LOC123219166	27377	25517	16454	567	546	1591	521.552	599.515	282.201	10.6425	10.6647	36.3761	467.756166666667	19.2277666666667	-4.60449	7.89292404091609e-15	1.12711653793135e-12	NC_058142.1	989173	991594	-	LOC123219166	--	K05907 adenylyl-sulfate reductase (glutathione) [EC:1.8.4.9] | (RefSeq) 5'-adenylylsulfate reductase 1, chloroplastic-like (A)	ko00920: Sulfur metabolism; ko01100: Metabolic pathways	5'-adenylylsulfate reductase 1, chloroplastic-like [Mangifera indica]	APR1_ARATH RecName: Full=5'-adenylylsulfate reductase 1, chloroplastic; EC=1.8.4.9; AltName: Full=3'-phosphoadenosine-5'-phosphosulfate reductase homolog 19; Short=PAPS reductase homolog 19; Short=Prh-19; AltName: Full=Adenosine 5'-phosphosulfate 5'-adenylylsulfate sulfotransferase 1; Short=APS sulfotransferase 1; AltName: Full=Thioredoxin-independent APS reductase 1; Flags: Precursor;	A0A2H5N567_CITUN RecName: Full=Thioredoxin domain-containing protein {ECO:0000259|PROSITE:PS51352};	Phosphoadenosine phosphosulfate reductase	GO:0009507,chloroplast; GO:0009570,chloroplast stroma; GO:0009536,plastid; GO:0051539,4 iron, 4 sulfur cluster binding; GO:0033741,adenylyl-sulfate reductase (glutathione) activity; GO:0009973,adenylyl-sulfate reductase activity; GO:0046872,metal ion binding; GO:0019344,cysteine biosynthetic process; GO:0000103,sulfate assimilation; GO:0019419,sulfate reduction; GO:0003674,molecular_function; GO:…	PF01507.22:Phosphoadenosine phosphosulfate reductase family	--	--	--
LOC123198221	230	82	206	6	9	8	4.3347	1.9059	3.4952	0.1114	0.1739	0.181	3.24526666666667	0.155433333333333	-4.38397	8.00566377363089e-15	1.13817967826603e-12	NC_058151.1	2146576	2149035	-	LOC123198221	--	--	--	low-temperature-induced 65 kDa protein-like [Mangifera indica]	LTI65_ARATH RecName: Full=Low-temperature-induced 65 kDa protein; AltName: Full=Desiccation-responsive protein 29B;	V4S8K6_CITCL SubName: Full=Uncharacterized protein {ECO:0000313|EMBL:ESR35155.1};	--	GO:0009738,abscisic acid-activated signaling pathway; GO:0010150,leaf senescence; GO:0009737,response to abscisic acid; GO:0009409,response to cold; GO:0009651,response to salt stress; GO:0009414,response to water deprivation; GO:0007154,cell communication; GO:0007165,signal transduction; GO:0008150,biological_process; GO:0009719,response to endogenous stimulus; GO:0009725,response to hormone; GO…	PF07918.14:CAP160 repeat	--	--	--
LOC123202421	118	183	148	1651	1698	1306	2.6565	5.0808	2.9996	36.6198	39.1924	35.2856	3.57896666666667	37.0326	3.37118083025534	8.18961796592267e-15	1.15922605532554e-12	NC_058154.1	778506	781401	+	LOC123202421	--	--	--	uncharacterized protein LOC123202421 isoform X1 [Mangifera indica]	--	V4SNL9_CITCL SubName: Full=Uncharacterized protein {ECO:0000313|EMBL:ESR42262.1};	--	--	--	--	--	--
LOC123224799	149	127	219	7036	2812	1347	2.4672	2.5935	3.2647	114.787	47.7397	26.7684	2.77513333333333	63.0985333333333	4.50697747790362	9.24789660887203e-15	1.30330728060317e-12	NC_058145.1	15359386	15362540	+	LOC123224799	--	K12133 MYB-related transcription factor LHY | (RefSeq) protein LATE ELONGATED HYPOCOTYL-like (A)	ko04712: Circadian rhythm - plant	protein REVEILLE 1-like isoform X1 [Mangifera indica]	RVE1_ARATH RecName: Full=Protein REVEILLE 1;	A0A5C7ILV9_9ROSI SubName: Full=Uncharacterized protein {ECO:0000313|EMBL:TXG69834.1};	Zuotin and related molecular chaperones (DnaJ superfamily), contains DNA-binding domains	GO:0005634,nucleus; GO:0003677,DNA binding; GO:0003700,DNA-binding transcription factor activity; GO:0009734,auxin-activated signaling pathway; GO:0007623,circadian rhythm; GO:0010600,regulation of auxin biosynthetic process; GO:0006355,regulation of DNA-templated transcription; GO:0003674,molecular_function; GO:0003676,nucleic acid binding; GO:0005488,binding; GO:0097159,organic cyclic compound …	PF00249.34:Myb-like DNA-binding domain	MYB-related	TF	MYB->MYB-related
LOC123202407	4	4	9	143	152	185	0.0376	0.0463	0.0761	1.3234	1.4639	2.0855	0.0533333333333333	1.62426666666667	4.92860719930895	9.35472895196335e-15	1.31263116289875e-12	NC_058154.1	9201084	9210760	+	LOC123202407	--	K13418 somatic embryogenesis receptor kinase 1 [EC:2.7.10.1 2.7.11.1] | (RefSeq) somatic embryogenesis receptor kinase 2 (A)	--	probable LRR receptor-like serine/threonine-protein kinase At1g53430 [Mangifera indica]	Y5343_ARATH RecName: Full=Probable LRR receptor-like serine/threonine-protein kinase At1g53430; EC=2.7.11.1; Flags: Precursor;	A0A067DHQ0_CITSI RecName: Full=Protein kinase domain-containing protein {ECO:0000259|PROSITE:PS50011};	--	GO:0016021,integral component of membrane; GO:0005886,plasma membrane; GO:0005524,ATP binding; GO:0106310,protein serine kinase activity; GO:0004674,protein serine/threonine kinase activity; GO:0006468,protein phosphorylation; GO:0000166,nucleotide binding; GO:0003674,molecular_function; GO:0005488,binding; GO:0017076,purine nucleotide binding; GO:0030554,adenyl nucleotide binding; GO:0032553,rib…	PF07714.20:Protein tyrosine and serine/threonine kinase	--	--	--
LOC123197736	3053	6815	2244	271	238	187	52.711	145.111	34.8797	4.6099	4.213	3.8748	77.5671	4.23256666666667	-4.19584	1.00956179459173e-14	1.41045834618437e-12	NC_058138.1	24291200	24293483	-	LOC123197736	--	K18819 inositol 3-alpha-galactosyltransferase [EC:2.4.1.123] | (RefSeq) galactinol synthase 2-like (A)	ko00052: Galactose metabolism; ko01100: Metabolic pathways	galactinol synthase 2-like [Mangifera indica]	GOLS2_SOLLC RecName: Full=Galactinol synthase 2; Short=GolS-2; Short=SlGolS2; EC=2.4.1.123;	A0A3Q7F9I0_SOLLC RecName: Full=Hexosyltransferase {ECO:0000256|RuleBase:RU362027}; EC=2.4.1.- {ECO:0000256|RuleBase:RU362027};	Glycosyl transferase, family 8 - glycogenin	GO:0005737,cytoplasm; GO:0016757,glycosyltransferase activity; GO:0047216,inositol 3-alpha-galactosyltransferase activity; GO:0046872,metal ion binding; GO:0006012,galactose metabolic process; GO:0003674,molecular_function; GO:0003824,catalytic activity; GO:0016740,transferase activity; GO:0008194,UDP-glycosyltransferase activity; GO:0008378,galactosyltransferase activity; GO:0016758,hexosyltrans…	PF01501.23:Glycosyl transferase family 8	--	--	--
LOC123227243	1165	713	936	171	144	74	40.9516	30.9096	29.6208	5.9223	5.1898	3.1218	33.8273333333333	4.74463333333333	-2.83382	1.06241304204034e-14	1.4778989700762e-12	NC_058146.1	3685886	3687722	-	LOC123227243	--	K08907 light-harvesting complex I chlorophyll a/b binding protein 1 | (RefSeq) chlorophyll a-b binding protein 6A, chloroplastic-like (A)	ko00196: Photosynthesis - antenna proteins; ko01100: Metabolic pathways	chlorophyll a-b binding protein 6A, chloroplastic-like [Mangifera indica]	CB11_SOLLC RecName: Full=Chlorophyll a-b binding protein 6A, chloroplastic; AltName: Full=LHCI type I CAB-6A; AltName: Full=Light-harvesting complex I 26 kDa protein; Flags: Precursor;	A0A2P6SJI7_ROSCH RecName: Full=Chlorophyll a-b binding protein, chloroplastic {ECO:0000256|RuleBase:RU363080};	--	GO:0009535,chloroplast thylakoid membrane; GO:0016021,integral component of membrane; GO:0009522,photosystem I; GO:0009523,photosystem II; GO:0016168,chlorophyll binding; GO:0046872,metal ion binding; GO:0009768,photosynthesis, light harvesting in photosystem I; GO:0009416,response to light stimulus; GO:0003674,molecular_function; GO:0005488,binding; GO:0046906,tetrapyrrole binding; GO:0097159,or…	PF00504.24:Chlorophyll A-B binding protein	--	--	--
LOC123213763	1605	2204	5417	78	116	209	60.922	103.174	185.112	2.917	4.5144	9.5209	116.402433333333	5.65076666666667	-4.36453	1.16929257133502e-14	1.61959567187533e-12	NC_058140.1	16345219	16346145	-	LOC123213763	--	K13993 HSP20 family protein | (RefSeq) 22.7 kDa class IV heat shock protein-like (A)	ko04141: Protein processing in endoplasmic reticulum	22.7 kDa class IV heat shock protein-like [Mangifera indica]	HSP41_PEA RecName: Full=22.7 kDa class IV heat shock protein; Flags: Precursor;	A0A8J4R7S8_9ROSI SubName: Full=Uncharacterized protein {ECO:0000313|EMBL:KAF3958519.1};	Molecular chaperone (small heat-shock protein Hsp26/Hsp42)	GO:0005788,endoplasmic reticulum lumen; GO:0009408,response to heat; GO:0006950,response to stress; GO:0008150,biological_process; GO:0009266,response to temperature stimulus; GO:0009628,response to abiotic stimulus; GO:0050896,response to stimulus; GO:0005575,cellular_component; GO:0005622,intracellular anatomical structure; GO:0005737,cytoplasm; GO:0005783,endoplasmic reticulum; GO:0012505,endo…	PF00011.24:Hsp20/alpha crystallin family	--	--	--
LOC123227091	10	27	2	2078	1836	609	0.3498	1.1647	0.063	71.6102	65.8412	25.5642	0.525833333333333	54.3385333333333	6.69122621629767	1.34522599398329e-14	1.85531959418046e-12	NC_058146.1	7796672	7798613	-	LOC123227091	--	K03671 thioredoxin 1 | (RefSeq) thioredoxin-like (A)	--	thioredoxin-like 3-1, chloroplastic isoform X1 [Mangifera indica]	TRL31_ARATH RecName: Full=Thioredoxin-like 3-1, chloroplastic; AltName: Full=Thioredoxin WCRKC-1; Flags: Precursor;	V4SVX4_CITCL RecName: Full=Thioredoxin domain-containing protein {ECO:0000259|PROSITE:PS51352};	Thioredoxin	GO:0009570,chloroplast stroma; GO:0005575,cellular_component; GO:0005622,intracellular anatomical structure; GO:0005737,cytoplasm; GO:0009507,chloroplast; GO:0009532,plastid stroma; GO:0009536,plastid; GO:0043226,organelle; GO:0043227,membrane-bounded organelle; GO:0043229,intracellular organelle; GO:0043231,intracellular membrane-bounded organelle; GO:0110165,cellular anatomical entity	PF00085.23:Thioredoxin	--	--	--
LOC123195068	222	112	179	1735	1338	1241	3.9313	2.446	2.8537	30.2712	24.293	26.3747	3.077	26.9796333333333	3.13227439269051	1.43029681612173e-14	1.9642540062424e-12	NC_058149.1	15364266	15369319	+	LOC123195068	--	K12812 ATP-dependent RNA helicase UAP56/SUB2 [EC:3.6.4.13] | (RefSeq) DEAD-box ATP-dependent RNA helicase 15-like isoform X1 (A)	ko03013: Nucleocytoplasmic transport; ko03015: mRNA surveillance pathway; ko03040: Spliceosome	DEAD-box ATP-dependent RNA helicase 15-like isoform X1 [Mangifera indica]	RH15_ARATH RecName: Full=DEAD-box ATP-dependent RNA helicase 15; EC=3.6.4.13; AltName: Full=UAP56 homolog A;	A0A5C7I0B1_9ROSI SubName: Full=Uncharacterized protein {ECO:0000313|EMBL:TXG62156.1};	ATP-dependent RNA helicase	GO:0005829,cytosol; GO:0005730,nucleolus; GO:0005634,nucleus; GO:0009506,plasmodesma; GO:0005524,ATP binding; GO:0016887,ATP hydrolysis activity; GO:0003690,double-stranded DNA binding; GO:0003725,double-stranded RNA binding; GO:0003729,mRNA binding; GO:0003723,RNA binding; GO:0003724,RNA helicase activity; GO:0003727,single-stranded RNA binding; GO:0006397,mRNA processing; GO:0051028,mRNA transp…	PF00270.32:DEAD/DEAH box helicase	--	--	--
LOC123225003	225	251	325	36	16	32	3.3391	4.5939	4.3422	0.5264	0.2435	0.5699	4.09173333333333	0.4466	-3.19566	1.57007122883143e-14	2.14707240542698e-12	NC_058145.1	11440410	11444340	+	LOC123225003	--	--	--	F-box protein At2g26850-like [Mangifera indica]	FB118_ARATH RecName: Full=F-box protein At2g26850;	A0A067ELJ2_CITSI RecName: Full=F-box domain-containing protein {ECO:0000259|PROSITE:PS50181};	--	--	PF00646.36:F-box domain	--	--	--
LOC123201356	836	673	813	5801	9400	8538	24.3712	24.1961	21.3372	166.619	280.959	298.718	23.3015	248.765	3.41629110512328	1.61285978419097e-14	2.19627948587321e-12	NC_058154.1	3709155	3710361	-	LOC123201356	--	K14496 abscisic acid receptor PYR/PYL family | (RefSeq) abscisic acid receptor PYL4-like (A)	ko04016: MAPK signaling pathway - plant; ko04075: Plant hormone signal transduction	abscisic acid receptor PYL4-like [Mangifera indica]	PYL4_ARATH RecName: Full=Abscisic acid receptor PYL4 {ECO:0000303|PubMed:19407142, ECO:0000303|PubMed:19624469, ECO:0000303|PubMed:19898420, ECO:0000303|PubMed:21658606, ECO:0000303|PubMed:23844015, ECO:0000303|PubMed:24563205}; AltName: Full=ABI1-binding protein 2 {ECO:0000303|PubMed:19874541}; AltName: Full=PYR1-like protein 4 {ECO:0000303|PubMed:19407142, ECO:0000303|PubMed:19624469, ECO:00003…	A0A067FIJ4_CITSI SubName: Full=Uncharacterized protein {ECO:0000313|EMBL:KDO63257.1};	--	GO:0005737,cytoplasm; GO:0005634,nucleus; GO:0009705,plant-type vacuole membrane; GO:0005886,plasma membrane; GO:0010427,abscisic acid binding; GO:0042803,protein homodimerization activity; GO:0004864,protein phosphatase inhibitor activity; GO:0038023,signaling receptor activity; GO:0044389,ubiquitin-like protein ligase binding; GO:0009738,abscisic acid-activated signaling pathway; GO:0080163,reg…	PF10604.12:Polyketide cyclase / dehydrase and lipid transport	--	--	--
LOC123199621	1778	1236	1349	212	222	237	43.658	37.4291	29.8209	5.1288	5.5889	6.9842	36.9693333333333	5.90063333333333	-2.64739	1.63909178381592e-14	2.22262223273493e-12	NC_058152.1	1897690	1900212	+	LOC123199621	--	K20858 calcium uniporter protein, mitochondrial | (RefSeq) calcium uniporter protein 2, mitochondrial-like (A)	--	calcium uniporter protein 2, mitochondrial-like [Mangifera indica]	MCU2_ARATH RecName: Full=Calcium uniporter protein 2, mitochondrial; Flags: Precursor;	A0A5C7GPR9_9ROSI RecName: Full=Calcium uniporter protein {ECO:0000256|RuleBase:RU367035};	Uncharacterized conserved protein	GO:0031305,integral component of mitochondrial inner membrane; GO:1990246,uniplex complex; GO:0005262,calcium channel activity; GO:0015292,uniporter activity; GO:0036444,calcium import into the mitochondrion; GO:0051560,mitochondrial calcium ion homeostasis; GO:0003674,molecular_function; GO:0005215,transporter activity; GO:0005216,ion channel activity; GO:0005261,cation channel activity; GO:0008…	PF04678.16:Mitochondrial calcium uniporter	--	--	--
LOC123202339	85627	91817	77561	8424	6014	1483	1704.15	2253.61	1389.68	165.182	122.717	35.4219	1782.48	107.774	-4.04781	2.10388259909318e-14	2.83623908495498e-12	NC_058154.1	1205017	1207605	-	LOC123202339	--	--	--	ribulose bisphosphate carboxylase/oxygenase activase, chloroplastic-like isoform X1 [Mangifera indica]	RCA_MALDO RecName: Full=Ribulose bisphosphate carboxylase/oxygenase activase, chloroplastic; Short=RA; Short=RuBisCO activase; Flags: Precursor;	A0A6P6ARR1_DURZI SubName: Full=ribulose bisphosphate carboxylase/oxygenase activase 2, chloroplastic-like isoform X2 {ECO:0000313|RefSeq:XP_022767589.1};	26S proteasome regulatory complex, ATPase RPT4	GO:0009570,chloroplast stroma; GO:0005524,ATP binding; GO:0016887,ATP hydrolysis activity; GO:0000166,nucleotide binding; GO:0003674,molecular_function; GO:0005488,binding; GO:0017076,purine nucleotide binding; GO:0030554,adenyl nucleotide binding; GO:0032553,ribonucleotide binding; GO:0032555,purine ribonucleotide binding; GO:0032559,adenyl ribonucleotide binding; GO:0035639,purine ribonucleosid…	PF00004.32:ATPase family associated with various cellular activities (AAA)	--	--	--
LOC123225036	2601	4450	12741	183	271	381	130.557	275.473	575.758	9.0503	13.9468	22.952	327.262766666667	15.3163666666667	-4.4173	2.10918532640038e-14	2.83623908495498e-12	NC_058145.1	13598820	13599520	+	LOC123225036	--	K13993 HSP20 family protein | (RefSeq) 18.5 kDa class I heat shock protein-like (A)	ko04141: Protein processing in endoplasmic reticulum	18.5 kDa class I heat shock protein-like [Mangifera indica]	HSP16_SOYBN RecName: Full=18.5 kDa class I heat shock protein; AltName: Full=HSP 18.5;	A0A2K8BQV1_MANIN SubName: Full=Heat shock protein 18.3 {ECO:0000313|EMBL:AJA79009.1};	Molecular chaperone (small heat-shock protein Hsp26/Hsp42)	GO:0005737,cytoplasm; GO:0043621,protein self-association; GO:0051082,unfolded protein binding; GO:0051259,protein complex oligomerization; GO:0006457,protein folding; GO:0009408,response to heat; GO:0042542,response to hydrogen peroxide; GO:0009651,response to salt stress; GO:0003674,molecular_function; GO:0005488,binding; GO:0005515,protein binding; GO:0008150,biological_process; GO:0009987,cel…	PF00011.24:Hsp20/alpha crystallin family	--	--	--
LOC123224584	548	817	1015	160	130	121	24.3771	44.8212	40.6484	7.0125	5.9291	6.4598	36.6155666666667	6.46713333333333	-2.50126	2.13019401997508e-14	2.85260380110605e-12	NC_058144.1	1449046	1449836	-	LOC123224584	--	K16281 RING-H2 zinc finger protein RHA1 | (RefSeq) brassinosteroid-responsive RING protein 1-like (A)	--	brassinosteroid-responsive RING protein 1-like [Mangifera indica]	BRH1_ARATH RecName: Full=Brassinosteroid-responsive RING protein 1 {ECO:0000303|PubMed:12012249};	A0A5C7I1G1_9ROSI RecName: Full=RING-type domain-containing protein {ECO:0000259|PROSITE:PS50089};	FOG: Predicted E3 ubiquitin ligase	GO:0016021,integral component of membrane; GO:0061630,ubiquitin protein ligase activity; GO:0008270,zinc ion binding; GO:0009742,brassinosteroid mediated signaling pathway; GO:0016567,protein ubiquitination; GO:1901371,regulation of leaf morphogenesis; GO:1905421,regulation of plant organ morphogenesis; GO:0009741,response to brassinosteroid; GO:0010200,response to chitin; GO:0003674,molecular_fu…	PF13639.9:Ring finger domain	--	--	--
LOC123219049	1332	970	1552	366	332	297	20.6743	18.5677	21.6868	5.597	5.2834	5.5325	20.3096	5.47096666666667	-1.89229	2.13978400611584e-14	2.85360534005688e-12	NC_058142.1	1125371	1131475	+	LOC123219049	--	--	--	uncharacterized GPI-anchored protein At1g61900-like isoform X1 [Mangifera indica]	UGPI6_ARATH RecName: Full=Uncharacterized GPI-anchored protein At1g61900; Flags: Precursor;	A0A067GSE5_CITSI RecName: Full=SPARK domain-containing protein {ECO:0000259|Pfam:PF19160};	--	GO:0031225,anchored component of membrane; GO:0046658,anchored component of plasma membrane; GO:0005634,nucleus; GO:0009506,plasmodesma; GO:0005575,cellular_component; GO:0016020,membrane; GO:0031224,intrinsic component of membrane; GO:0110165,cellular anatomical entity; GO:0005886,plasma membrane; GO:0031226,intrinsic component of plasma membrane; GO:0071944,cell periphery; GO:0005622,intracellu…	PF19160.3:SPARK	--	--	--
LOC123202255	29	24	33	377	256	202	0.7394	0.7547	0.7575	9.4709	6.6924	6.1814	0.750533333333333	7.44823333333333	3.31091021680459	2.3586026186637e-14	3.1324766383594e-12	NC_058154.1	4241912	4245121	-	LOC123202255	--	K07152 protein SCO1 | (RefSeq) protein SCO1 homolog 2, mitochondrial (A)	--	protein SCO1 homolog 1, mitochondrial-like isoform X1 [Mangifera indica]	SCO11_ARATH RecName: Full=Protein SCO1 homolog 1, mitochondrial; AltName: Full=Homolog of the copper chaperone SCO1 member 1; Short=HCC1; Flags: Precursor;	A0A067EZS3_CITSI RecName: Full=Thioredoxin domain-containing protein {ECO:0000259|PROSITE:PS51352};	Putative cytochrome C oxidase assembly protein	GO:0016021,integral component of membrane; GO:0005743,mitochondrial inner membrane; GO:0005739,mitochondrion; GO:0005507,copper ion binding; GO:0009793,embryo development ending in seed dormancy; GO:0033617,mitochondrial cytochrome c oxidase assembly; GO:0003674,molecular_function; GO:0005488,binding; GO:0043167,ion binding; GO:0043169,cation binding; GO:0046872,metal ion binding; GO:0046914,tran…	PF02630.17:SCO1/SenC	--	--	--
LOC123200177	1600	1203	2335	21	62	106	78.9604	73.2173	103.741	1.0211	3.1371	6.2781	85.3063333333333	3.47876666666667	-4.61601	2.43774092916587e-14	3.22431200848239e-12	NC_058153.1	5110948	5111660	+	LOC123200177	--	K13993 HSP20 family protein | (RefSeq) 17.1 kDa class II heat shock protein-like (A)	ko04141: Protein processing in endoplasmic reticulum	17.1 kDa class II heat shock protein-like [Mangifera indica]	HSP21_SOYBN RecName: Full=17.9 kDa class II heat shock protein;	A0A6M2F930_9ROSI RecName: Full=SHSP domain-containing protein {ECO:0000259|PROSITE:PS01031};	Molecular chaperone (small heat-shock protein Hsp26/Hsp42)	GO:0005737,cytoplasm; GO:0043621,protein self-association; GO:0051082,unfolded protein binding; GO:0051259,protein complex oligomerization; GO:0006457,protein folding; GO:0009408,response to heat; GO:0042542,response to hydrogen peroxide; GO:0009651,response to salt stress; GO:0003674,molecular_function; GO:0005488,binding; GO:0005515,protein binding; GO:0008150,biological_process; GO:0009987,cel…	PF00011.24:Hsp20/alpha crystallin family	--	--	--
LOC123224076	134	159	234	1260	1164	925	3.7361	5.4673	5.8737	34.613	33.2749	30.9525	5.0257	32.9468	2.71274188858964	2.57577596928557e-14	3.39298032068381e-12	NC_058144.1	7836531	7840686	+	LOC123224076	--	K17081 prohibitin 2 | (RefSeq) prohibitin-1, mitochondrial isoform X1 (A)	--	prohibitin-1, mitochondrial isoform X1 [Mangifera indica]	PHB1_ARATH RecName: Full=Prohibitin-1, mitochondrial; Short=Atphb1;	A0A5C7HE89_9ROSI RecName: Full=Prohibitin {ECO:0000256|RuleBase:RU366048};	Prohibitin-like protein	GO:0005747,mitochondrial respiratory chain complex I; GO:0005739,mitochondrion; GO:0000325,plant-type vacuole; GO:0007005,mitochondrion organization; GO:0006996,organelle organization; GO:0008150,biological_process; GO:0009987,cellular process; GO:0016043,cellular component organization; GO:0071840,cellular component organization or biogenesis; GO:0005575,cellular_component; GO:0005622,intracellu…	PF01145.28:SPFH domain / Band 7 family	--	--	--
LOC123212967	224	195	299	56	40	32	3.8674	4.1521	4.6475	0.9526	0.7081	0.6631	4.22233333333333	0.7746	-2.44652	2.65961303853327e-14	3.47701005278998e-12	NC_058140.1	20720321	20724798	-	LOC123212967	--	K22390 acid phosphatase type 7 | (RefSeq) probable inactive purple acid phosphatase 1 (A)	--	probable inactive purple acid phosphatase 1 [Mangifera indica]	PPA27_ARATH RecName: Full=Probable inactive purple acid phosphatase 27; Flags: Precursor;	A0A6P5YUT7_DURZI RecName: Full=Purple acid phosphatase {ECO:0000256|RuleBase:RU361203}; EC=3.1.3.2 {ECO:0000256|RuleBase:RU361203};	Purple acid phosphatase	GO:0005576,extracellular region; GO:0003993,acid phosphatase activity; GO:0046872,metal ion binding; GO:0003674,molecular_function; GO:0003824,catalytic activity; GO:0016787,hydrolase activity; GO:0016788,hydrolase activity, acting on ester bonds; GO:0016791,phosphatase activity; GO:0042578,phosphoric ester hydrolase activity; GO:0005488,binding; GO:0043167,ion binding; GO:0043169,cation binding;…	PF17808.4:Fn3-like domain from Purple Acid Phosphatase	--	--	--
LOC123214264	11	1	6	187	481	466	0.4122	0.0462	0.2024	6.904	18.48	20.9572	0.220266666666667	15.4470666666667	6.13193790612459	2.66111450140714e-14	3.47701005278998e-12	NC_058140.1	10273820	10274758	-	LOC123214264	--	--	--	anti-H(O) lectin 1-like [Mangifera indica]	LEC2_CLAKE RecName: Full=Agglutinin-2; AltName: Full=Agglutinin II; AltName: Full=ClAII; AltName: Full=LecClAII; Flags: Precursor;	V4UC64_CITCL RecName: Full=Protein kinase domain-containing protein {ECO:0000259|PROSITE:PS50011}; Flags: Fragment;	--	GO:0005537,mannose binding; GO:0046872,metal ion binding; GO:0003674,molecular_function; GO:0005488,binding; GO:0030246,carbohydrate binding; GO:0036094,small molecule binding; GO:0048029,monosaccharide binding; GO:0043167,ion binding; GO:0043169,cation binding	PF00139.22:Legume lectin domain	--	--	--
LOC123216735	346	262	382	2154	2126	2393	9.394	8.7727	9.3371	57.6193	59.1808	77.9741	9.16793333333333	64.9247333333333	2.82409972493774	2.70609650924883e-14	3.5215263162495e-12	NC_058137.1	25466836	25470285	+	LOC123216735	--	K00026 malate dehydrogenase [EC:1.1.1.37] | (RefSeq) malate dehydrogenase, mitochondrial-like (A)	ko00020: Citrate cycle (TCA cycle); ko00270: Cysteine and methionine metabolism; ko00620: Pyruvate metabolism; ko00630: Glyoxylate and dicarboxylate metabolism; ko00710: Carbon fixation in photosynthetic organisms; ko01100: Metabolic pathways; ko01110: Biosynthesis of secondary metabolites; ko01200: Carbon metabolism	malate dehydrogenase, mitochondrial-like [Mangifera indica]	MDHM_CITLA RecName: Full=Malate dehydrogenase, mitochondrial; EC=1.1.1.37; AltName: Allergen=Citr l MDH {ECO:0000305}; Flags: Precursor;	A0A067DZE8_CITSI RecName: Full=Malate dehydrogenase {ECO:0000256|ARBA:ARBA00012995, ECO:0000256|RuleBase:RU003405}; EC=1.1.1.37 {ECO:0000256|ARBA:ARBA00012995, ECO:0000256|RuleBase:RU003405};	NAD-dependent malate dehydrogenase	GO:0005759,mitochondrial matrix; GO:0030060,L-malate dehydrogenase activity; GO:0006108,malate metabolic process; GO:0006099,tricarboxylic acid cycle; GO:0003674,molecular_function; GO:0003824,catalytic activity; GO:0016491,oxidoreductase activity; GO:0016614,oxidoreductase activity, acting on CH-OH group of donors; GO:0016615,malate dehydrogenase activity; GO:0016616,oxidoreductase activity, act…	PF02866.21:lactate/malate dehydrogenase, alpha/beta C-terminal domain	--	--	--
LOC123217468	3609	2068	4385	565	490	617	92.1544	65.1237	100.803	14.2143	12.8283	18.9081	86.0271333333333	15.3169	-2.48967	2.73319071953342e-14	3.54250056592378e-12	NC_058141.1	14683411	14686586	-	LOC123217468	--	K22762 desumoylating isopeptidase 1 [EC:3.4.-.-] | (RefSeq) desumoylating isopeptidase 1 (A)	--	desumoylating isopeptidase 1 [Mangifera indica]	PPDEX_ARATH RecName: Full=DeSI-like protein At4g17486; EC=3.4.-.-;	A0A2N9IQB6_FAGSY RecName: Full=PPPDE domain-containing protein {ECO:0000259|PROSITE:PS51858};	Uncharacterized conserved protein	GO:0101005,deubiquitinase activity; GO:0016579,protein deubiquitination; GO:0070646,protein modification by small protein removal; GO:0003674,molecular_function; GO:0003824,catalytic activity; GO:0008233,peptidase activity; GO:0016787,hydrolase activity; GO:0019783,ubiquitin-like protein peptidase activity; GO:0140096,catalytic activity, acting on a protein; GO:0006508,proteolysis; GO:0006807,nit…	PF05903.17:PPPDE putative peptidase domain	--	--	--
LOC123192280	73	94	78	847	753	899	2.0681	3.2843	1.9894	23.6423	21.8724	30.5669	2.44726666666667	25.3605333333333	3.37334186723753	3.32597314062624e-14	4.29356524669723e-12	NC_058148.1	13574061	13577206	-	LOC123192280	--	K02888 large subunit ribosomal protein L21 | (RefSeq) 50S ribosomal protein L21, mitochondrial (A)	ko03010: Ribosome	50S ribosomal protein L21, mitochondrial [Mangifera indica]	RM21_ARATH RecName: Full=50S ribosomal protein L21, mitochondrial {ECO:0000303|PubMed:11675010}; AltName: Full=Protein NUCLEAR FUSION DEFECTIVE 1 {ECO:0000303|PubMed:16698901}; Flags: Precursor;	A0A067G8I8_CITSI SubName: Full=Uncharacterized protein {ECO:0000313|EMBL:KDO75978.1};	Mitochondrial/chloroplast ribosomal L21 protein	GO:0005739,mitochondrion; GO:0005886,plasma membrane; GO:0005840,ribosome; GO:0019843,rRNA binding; GO:0003735,structural constituent of ribosome; GO:0000976,transcription cis-regulatory region binding; GO:0009567,double fertilization forming a zygote and endosperm; GO:0009553,embryo sac development; GO:0000741,karyogamy; GO:0010197,polar nucleus fusion; GO:0009555,pollen development; GO:0006412,…	PF00829.24:Ribosomal prokaryotic L21 protein	--	--	--
LOC123225489	1613	1094	1594	366	237	290	14.9045	12.4669	13.2601	3.3321	2.2453	3.216	13.5438333333333	2.93113333333333	-2.20811	3.56653173395213e-14	4.58576408963494e-12	NC_058145.1	17390803	17398773	-	LOC123225489	--	K25780 kelch domain-containing protein 4 | (RefSeq) protein RIK-like isoform X1 (A)	--	protein RIK-like isoform X2 [Mangifera indica]	RIK_ARATH RecName: Full=Protein RIK; AltName: Full=Rough sheath 2-interacting KH domain protein; Short=RS2-interacting KH domain protein;	V4T4P9_CITCL SubName: Full=Uncharacterized protein {ECO:0000313|EMBL:ESR44531.1};	Predicted RNA-binding protein, contains KH domains	GO:0005634,nucleus; GO:0003723,RNA binding; GO:0003674,molecular_function; GO:0003676,nucleic acid binding; GO:0005488,binding; GO:0097159,organic cyclic compound binding; GO:1901363,heterocyclic compound binding; GO:0005575,cellular_component; GO:0005622,intracellular anatomical structure; GO:0043226,organelle; GO:0043227,membrane-bounded organelle; GO:0043229,intracellular organelle; GO:0043231…	--	--	--	--
LOC123217247	817	557	1032	6802	5361	3485	12.461	10.4772	14.1705	102.216	83.8342	63.7923	12.3695666666667	83.2806666666667	2.75118665714775	3.64231916380781e-14	4.6635657542105e-12	NC_058141.1	13711642	13716412	-	LOC123217247	--	--	--	zinc finger protein CONSTANS-LIKE 9-like [Mangifera indica]	COL9_ARATH RecName: Full=Zinc finger protein CONSTANS-LIKE 9;	A0A0B5AIA6_9ROSI SubName: Full=CONSTANS-LIKE 9-1 {ECO:0000313|EMBL:AJD87513.1}; SubName: Full=CONSTANS-LIKE 9-2 {ECO:0000313|EMBL:AJD87514.1};	--	GO:0005634,nucleus; GO:0003700,DNA-binding transcription factor activity; GO:0000976,transcription cis-regulatory region binding; GO:0008270,zinc ion binding; GO:0007623,circadian rhythm; GO:0048579,negative regulation of long-day photoperiodism, flowering; GO:0006355,regulation of DNA-templated transcription; GO:0003674,molecular_function; GO:0140110,transcription regulator activity; GO:0001067,…	PF06203.17:CCT motif	C2C2-CO-like	TF	C2C2->C2C2-CO-like
LOC123200189	2476	1600	2072	79	124	211	114.635	91.3574	86.3636	3.6036	5.8861	11.7242	97.4518666666667	7.0713	-3.78464	3.65594191991837e-14	4.6635657542105e-12	NC_058153.1	5140500	5141259	+	LOC123200189	--	K13993 HSP20 family protein | (RefSeq) 17.3 kDa class II heat shock protein-like (A)	ko04141: Protein processing in endoplasmic reticulum	17.3 kDa class II heat shock protein-like [Mangifera indica]	HSP21_SOYBN RecName: Full=17.9 kDa class II heat shock protein;	A0A6M2F930_9ROSI RecName: Full=SHSP domain-containing protein {ECO:0000259|PROSITE:PS01031};	Molecular chaperone (small heat-shock protein Hsp26/Hsp42)	GO:0005737,cytoplasm; GO:0043621,protein self-association; GO:0051082,unfolded protein binding; GO:0051259,protein complex oligomerization; GO:0006457,protein folding; GO:0009408,response to heat; GO:0042542,response to hydrogen peroxide; GO:0009651,response to salt stress; GO:0003674,molecular_function; GO:0005488,binding; GO:0005515,protein binding; GO:0008150,biological_process; GO:0009987,cel…	PF00011.24:Hsp20/alpha crystallin family	--	--	--
LOC123192908	133	154	135	1954	1240	918	2.3329	3.3314	2.1319	33.7692	22.3005	19.3252	2.59873333333333	25.1316333333333	3.27362393097819	3.88925878123953e-14	4.94165545854108e-12	NC_058148.1	12124115	12128920	-	LOC123192908	--	K14768 U3 small nucleolar RNA-associated protein 7 | (RefSeq) probable U3 small nucleolar RNA-associated protein 7 (A)	--	probable U3 small nucleolar RNA-associated protein 7 [Mangifera indica]	PRP19_ORYSJ RecName: Full=Pre-mRNA-processing factor 19 {ECO:0000305}; EC=2.3.2.27 {ECO:0000269|PubMed:19825583}; AltName: Full=Plant U-box protein 72; Short=OsPUB72; AltName: Full=RING-type E3 ubiquitin transferase PRP19 {ECO:0000305}; AltName: Full=U-box domain-containing protein 72;	A0A5C7H8F2_9ROSI RecName: Full=BING4CT domain-containing protein {ECO:0000259|SMART:SM01033};	WD40-repeat-containing subunit of the 18S rRNA processing complex	GO:0005737,cytoplasm; GO:0005634,nucleus; GO:0000974,Prp19 complex; GO:0071006,U2-type catalytic step 1 spliceosome; GO:0061630,ubiquitin protein ligase activity; GO:0004842,ubiquitin-protein transferase activity; GO:0006281,DNA repair; GO:0045087,innate immune response; GO:0000398,mRNA splicing, via spliceosome; GO:0070534,protein K63-linked ubiquitination; GO:0016567,protein ubiquitination; GO:…	PF08149.14:BING4CT (NUC141) domain	--	--	--
novel.1473	33	49	41	609	435	330	0.9933	1.8189	1.111	18.0605	13.4245	11.921	1.30773333333333	14.4686666666667	3.46779169055744	4.00189052873453e-14	5.06482404054312e-12	NC_058155.1	11187413	11189575	-	--	--	K16251 DNA-directed RNA polymerase V subunit 1 [EC:2.7.7.6] | (RefSeq) DNA-directed RNA polymerase V subunit 1 (A)	ko03020: RNA polymerase	protein DCL homolog, chloroplastic-like [Mangifera indica]	DCL_ARATH RecName: Full=Protein DCL homolog, chloroplastic {ECO:0000305}; Short=AtDCL {ECO:0000303|PubMed:15197595}; Flags: Precursor;	A0A5C7H5T3_9ROSI SubName: Full=Uncharacterized protein {ECO:0000313|EMBL:TXG52418.1};	--	GO:0009507,chloroplast; GO:0003729,mRNA binding; GO:0009658,chloroplast organization; GO:1901259,chloroplast rRNA processing; GO:0003674,molecular_function; GO:0003676,nucleic acid binding; GO:0003723,RNA binding; GO:0005488,binding; GO:0097159,organic cyclic compound binding; GO:1901363,heterocyclic compound binding; GO:0006996,organelle organization; GO:0008150,biological_process; GO:0009657,pl…	PF11523.11:Protein of unknown function (DUF3223)	--	--	--
LOC123197307	92	95	111	802	727	505	2.682	3.4155	2.9132	23.0353	21.7295	17.6684	3.00356666666667	20.8110666666667	2.79260232083505	4.08384988802172e-14	5.14836279047363e-12	NC_058151.1	3062510	3064252	-	LOC123197307	--	K14823 rRNA-processing protein EBP2 | (RefSeq) probable rRNA-processing protein EBP2 homolog (A)	--	probable rRNA-processing protein EBP2 homolog [Mangifera indica]	EBP2_ARATH RecName: Full=Probable rRNA-processing protein EBP2 homolog;	A0A5C7IPN0_9ROSI SubName: Full=Uncharacterized protein {ECO:0000313|EMBL:TXG70764.1};	Nucleolar protein-like/EBNA1-binding protein	GO:0034399,nuclear periphery; GO:0005730,nucleolus; GO:0030687,preribosome, large subunit precursor; GO:0003924,GTPase activity; GO:0003723,RNA binding; GO:0042273,ribosomal large subunit biogenesis; GO:0006364,rRNA processing; GO:0003674,molecular_function; GO:0003824,catalytic activity; GO:0016462,pyrophosphatase activity; GO:0016787,hydrolase activity; GO:0016817,hydrolase activity, acting on …	PF05890.15:Eukaryotic rRNA processing protein EBP2	--	--	--
LOC123210997	363	502	323	39	46	37	14.6142	24.9247	11.707	1.547	1.8988	1.7877	17.0819666666667	1.7445	-3.29159	4.20390692454638e-14	5.27909292513173e-12	NC_058139.1	11350875	11351909	-	LOC123210997	--	--	--	uncharacterized protein LOC123210997 [Mangifera indica]	--	A0A2H5PSB5_CITUN SubName: Full=Uncharacterized protein {ECO:0000313|EMBL:GAY55268.1};	--	GO:0016021,integral component of membrane; GO:0005575,cellular_component; GO:0016020,membrane; GO:0031224,intrinsic component of membrane; GO:0110165,cellular anatomical entity	--	--	--	--
LOC123217013	1535	1193	1707	307	212	310	23.2308	22.2667	23.2576	4.5777	3.2895	5.6306	22.9183666666667	4.49926666666667	-2.34874	4.31006921440487e-14	5.39142882777086e-12	NC_058141.1	14596514	14603888	-	LOC123217013	--	K05841 sterol 3beta-glucosyltransferase [EC:2.4.1.173] | (RefSeq) sterol 3-beta-glucosyltransferase UGT80A2-like (A)	--	sterol 3-beta-glucosyltransferase UGT80A2-like [Mangifera indica]	U80A2_ARATH RecName: Full=Sterol 3-beta-glucosyltransferase UGT80A2; EC=2.4.1.173; AltName: Full=UDP-glucose:sterol glucosyltransferase 80A2;	A0A5B6YQX8_DAVIN SubName: Full=Putative sterol 3-O-glucosyltransferase {ECO:0000313|EMBL:MPA33693.1}; EC=2.4.1.173 {ECO:0000313|EMBL:MPA33693.1};	UDP-glucuronosyl and UDP-glucosyl transferase	GO:0005829,cytosol; GO:0005886,plasma membrane; GO:0051507,beta-sitosterol UDP-glucosyltransferase activity; GO:0102203,brassicasterol glucosyltransferase activity; GO:0102205,cholesterol alpha-glucosyltransferase activity; GO:0102202,soladodine glucosyltransferase activity; GO:0016906,sterol 3-beta-glucosyltransferase activity; GO:0005975,carbohydrate metabolic process; GO:0030259,lipid glycosyl…	PF03033.23:Glycosyltransferase family 28 N-terminal domain	--	--	--
LOC123201418	38	113	79	2528	1153	1386	1.22	4.4741	2.2833	79.9639	37.9526	53.403	2.65913333333333	57.1065	4.42462694274254	4.41340484280713e-14	5.4993750769079e-12	NC_058154.1	1323269	1325188	+	LOC123201418	--	K15414 complement component 1 Q subcomponent-binding protein, mitochondrial | (RefSeq) uncharacterized protein At2g39795, mitochondrial-like (A)	--	uncharacterized protein At2g39795, mitochondrial-like [Mangifera indica]	YB95_ARATH RecName: Full=Uncharacterized protein At2g39795, mitochondrial; Flags: Precursor;	V4SP13_CITCL SubName: Full=Uncharacterized protein {ECO:0000313|EMBL:ESR42422.1};	MAM33, mitochondrial matrix glycoprotein	GO:0005794,Golgi apparatus; GO:0005759,mitochondrial matrix; GO:0005739,mitochondrion; GO:0005575,cellular_component; GO:0005622,intracellular anatomical structure; GO:0005737,cytoplasm; GO:0012505,endomembrane system; GO:0043226,organelle; GO:0043227,membrane-bounded organelle; GO:0043229,intracellular organelle; GO:0043231,intracellular membrane-bounded organelle; GO:0110165,cellular anatomical…	PF02330.19:Mitochondrial glycoprotein	--	--	--
LOC123194103	40675	10372	32185	1202	2035	1898	895.632	281.659	638.015	26.0769	45.9421	50.1571	605.102	40.7253666666667	-3.89318	4.68758871449193e-14	5.81855963779993e-12	NC_058149.1	14621909	14623820	-	LOC123194103	--	K22683 aspartyl protease family protein [EC:3.4.23.-] | (RefSeq) protein ASPARTIC PROTEASE IN GUARD CELL 1-like (A)	--	aspartyl protease family protein At5g10770-like [Mangifera indica]	ASPA_ARATH RecName: Full=Aspartyl protease family protein At5g10770; EC=3.4.23.- {ECO:0000305}; Flags: Precursor;	V4UBQ7_CITCL RecName: Full=Peptidase A1 domain-containing protein {ECO:0000259|PROSITE:PS51767};	Aspartyl protease	GO:0031225,anchored component of membrane; GO:0005886,plasma membrane; GO:0004190,aspartic-type endopeptidase activity; GO:0006508,proteolysis; GO:0003674,molecular_function; GO:0003824,catalytic activity; GO:0004175,endopeptidase activity; GO:0008233,peptidase activity; GO:0016787,hydrolase activity; GO:0070001,aspartic-type peptidase activity; GO:0140096,catalytic activity, acting on a protein;…	PF14543.9:Xylanase inhibitor N-terminal	--	--	--
novel.415	10	17	11	291	245	155	0.253	0.5303	0.2505	7.2526	6.3542	4.7056	0.3446	6.10413333333333	4.14679186880591	4.85031957601344e-14	5.99748519834029e-12	NC_058141.1	3995075	3999784	+	--	--	K12116 flavin-binding kelch repeat F-box protein 1 | (RefSeq) adagio protein 3-like (A)	ko04712: Circadian rhythm - plant	putative LOV domain-containing protein [Toxicodendron radicans]	ADO3_ARATH RecName: Full=Adagio protein 3; AltName: Full=F-box only protein 2a; Short=FBX2a; AltName: Full=Flavin-binding kelch repeat F-box protein 1;	A0A126X4B9_TOXRA SubName: Full=Putative LOV domain-containing protein {ECO:0000313|EMBL:AML79535.1};	--	GO:0005829,cytosol; GO:0005634,nucleus; GO:0019005,SCF ubiquitin ligase complex; GO:0009881,photoreceptor activity; GO:0007623,circadian rhythm; GO:0009908,flower development; GO:2001007,negative regulation of cellulose biosynthetic process; GO:0009911,positive regulation of flower development; GO:0016567,protein ubiquitination; GO:0010468,regulation of gene expression; GO:0006355,regulation of D…	PF13418.9:Galactose oxidase, central domain	--	--	--
LOC123209960	1155	2436	1391	212	90	86	12.8244	33.3574	13.9046	2.3192	1.0246	1.146	20.0288	1.4966	-3.74232	4.97017919143301e-14	6.12223637576785e-12	NC_058137.1	1230926	1236247	-	LOC123209960	--	K14510 serine/threonine-protein kinase CTR1 [EC:2.7.11.1] | (RefSeq) serine/threonine-protein kinase CTR1-like isoform X1 (A)	ko04016: MAPK signaling pathway - plant; ko04075: Plant hormone signal transduction	serine/threonine-protein kinase STY13-like [Mangifera indica]	STY13_ARATH RecName: Full=Serine/threonine-protein kinase STY13 {ECO:0000305}; EC=2.7.11.1 {ECO:0000269|PubMed:16429265}; AltName: Full=AtSTYPK {ECO:0000303|PubMed:17291444}; AltName: Full=Serine/threonine/tyrosine-protein kinase 13 {ECO:0000303|PubMed:16429265};	V4SZY4_CITCL RecName: Full=Protein kinase domain-containing protein {ECO:0000259|PROSITE:PS50011};	Tyrosine kinase specific for activated (GTP-bound) p21cdc42Hs	GO:0005737,cytoplasm; GO:0005524,ATP binding; GO:0004672,protein kinase activity; GO:0106310,protein serine kinase activity; GO:0004674,protein serine/threonine kinase activity; GO:0004712,protein serine/threonine/tyrosine kinase activity; GO:0004713,protein tyrosine kinase activity; GO:0006468,protein phosphorylation; GO:0045995,regulation of embryonic development; GO:0010344,seed oilbody biogen…	PF07714.20:Protein tyrosine and serine/threonine kinase	--	--	--
LOC123196667	2	0	2	2237	382	88	0.0683	0	0.0615	75.2203	13.3668	3.6044	0.0432666666666667	30.7305	9.47219954762215	5.06846600122634e-14	6.21956666378623e-12	NC_058138.1	17269095	17270355	+	LOC123196667	--	K12130 pseudo-response regulator 5 | (RefSeq) two-component response regulator-like APRR9 (A)	ko04712: Circadian rhythm - plant	zinc finger protein CONSTANS-LIKE 16-like [Mangifera indica]	CIA2_ARATH RecName: Full=Protein CHLOROPLAST IMPORT APPARATUS 2; Flags: Precursor;	A0A6P5ZNH3_DURZI SubName: Full=zinc finger protein CONSTANS-LIKE 7-like {ECO:0000313|RefSeq:XP_022753891.1};	GATA-4/5/6 transcription factors	GO:0009507,chloroplast; GO:0005634,nucleus; GO:0045036,protein targeting to chloroplast; GO:0006355,regulation of DNA-templated transcription; GO:0006605,protein targeting; GO:0006810,transport; GO:0006886,intracellular protein transport; GO:0008104,protein localization; GO:0008150,biological_process; GO:0009987,cellular process; GO:0015031,protein transport; GO:0033036,macromolecule localization…	PF06203.17:CCT motif	Others	TR	Others
LOC123205629	962	917	1148	263	265	225	15.9292	18.7261	17.1134	4.2907	4.4989	4.4713	17.2562333333333	4.4203	-1.9649	5.33956336092961e-14	6.52741395254854e-12	NW_025401102.1	115778	120449	-	LOC123205629	--	--	--	protein EMSY-LIKE 3-like isoform X2 [Mangifera indica]	EML3_ARATH RecName: Full=Protein EMSY-LIKE 3 {ECO:0000303|PubMed:21830950}; Short=AtEML3 {ECO:0000303|PubMed:21830950};	A0A5C7IV24_9ROSI RecName: Full=ENT domain-containing protein {ECO:0000259|PROSITE:PS51138};	Uncharacterized conserved protein, contains ENT domain	GO:0005634,nucleus; GO:0003682,chromatin binding; GO:0031491,nucleosome binding; GO:0050832,defense response to fungus; GO:0006357,regulation of transcription by RNA polymerase II; GO:0003674,molecular_function; GO:0005488,binding; GO:0044877,protein-containing complex binding; GO:0006950,response to stress; GO:0006952,defense response; GO:0008150,biological_process; GO:0009605,response to extern…	PF03735.17:ENT domain	--	--	--
LOC123199068	697	448	1571	116	105	81	12.0754	9.5721	24.5031	1.98	1.8651	1.6842	15.3835333333333	1.8431	-3.06118	5.57457281191493e-14	6.78898823995964e-12	NC_058152.1	11049929	11054939	+	LOC123199068	--	K00891 shikimate kinase [EC:2.7.1.71] | (RefSeq) shikimate kinase, chloroplastic isoform X1 (A)	ko00400: Phenylalanine, tyrosine and tryptophan biosynthesis; ko01100: Metabolic pathways; ko01110: Biosynthesis of secondary metabolites; ko01230: Biosynthesis of amino acids	shikimate kinase, chloroplastic isoform X1 [Mangifera indica]	SK_SOLLC RecName: Full=Shikimate kinase, chloroplastic; EC=2.7.1.71; Flags: Precursor;	A0A2H5NVZ5_CITUN RecName: Full=Shikimate kinase {ECO:0000256|ARBA:ARBA00012154}; EC=2.7.1.71 {ECO:0000256|ARBA:ARBA00012154};	--	GO:0009507,chloroplast; GO:0005524,ATP binding; GO:0046872,metal ion binding; GO:0004765,shikimate kinase activity; GO:0009073,aromatic amino acid family biosynthetic process; GO:0008652,cellular amino acid biosynthetic process; GO:0009423,chorismate biosynthetic process; GO:0016310,phosphorylation; GO:0000166,nucleotide binding; GO:0003674,molecular_function; GO:0005488,binding; GO:0017076,purin…	PF01202.25:Shikimate kinase	--	--	--
LOC123218274	171	263	185	6841	3969	1754	3.9352	7.4642	3.8328	155.11	93.6476	48.4434	5.0774	99.067	4.28624273846216	5.72426680498281e-14	6.9450850600455e-12	NC_058142.1	9801996	9805686	-	LOC123218274	--	K09523 DnaJ homolog subfamily C member 3 | (RefSeq) dnaJ protein P58IPK homolog isoform X1 (A)	ko04141: Protein processing in endoplasmic reticulum	dnaJ homolog subfamily B member 6-like isoform X2 [Mangifera indica]	DNJ49_ARATH RecName: Full=Chaperone protein dnaJ 49; Short=AtDjC49; Short=AtJ49;	V4SM80_CITCL RecName: Full=J domain-containing protein {ECO:0000259|PROSITE:PS50076};	Molecular chaperone (DnaJ superfamily)	GO:0005789,endoplasmic reticulum membrane; GO:0016021,integral component of membrane; GO:0030544,Hsp70 protein binding; GO:0071218,cellular response to misfolded protein; GO:0051085,chaperone cofactor-dependent protein refolding; GO:0030433,ubiquitin-dependent ERAD pathway; GO:0003674,molecular_function; GO:0005488,binding; GO:0005515,protein binding; GO:0031072,heat shock protein binding; GO:000…	PF00226.34:DnaJ domain	--	--	--
LOC123209149	41	53	74	572	542	337	0.7055	1.1247	1.1463	9.6968	9.5616	6.959	0.992166666666667	8.73913333333333	3.13883581998278	6.3078822084831e-14	7.62450496308521e-12	NC_058137.1	2153516	2155560	+	LOC123209149	--	K11131 H/ACA ribonucleoprotein complex subunit 4 [EC:5.4.99.-] | (RefSeq) H/ACA ribonucleoprotein complex subunit 4-like (A)	ko03008: Ribosome biogenesis in eukaryotes	H/ACA ribonucleoprotein complex subunit 4-like [Mangifera indica]	CBF5_ARATH RecName: Full=H/ACA ribonucleoprotein complex subunit 4; EC=5.4.99.-; AltName: Full=CBF5 homolog; AltName: Full=Dyskerin; AltName: Full=Nopp-140-associated protein of 57 kDa homolog; Short=AtNAP57; AltName: Full=Nucleolar protein NAP57 homolog;	A0A5N6RK57_9ROSI SubName: Full=Uncharacterized protein {ECO:0000313|EMBL:KAE8099413.1};	Pseudouridine synthase	GO:0031429,box H/ACA snoRNP complex; GO:0005829,cytosol; GO:0005730,nucleolus; GO:0009506,plasmodesma; GO:0009982,pseudouridine synthase activity; GO:0003723,RNA binding; GO:0000495,box H/ACA RNA 3'-end processing; GO:1990481,mRNA pseudouridine synthesis; GO:0031118,rRNA pseudouridine synthesis; GO:0031120,snRNA pseudouridine synthesis; GO:0003674,molecular_function; GO:0003824,catalytic activity…	PF08068.15:DKCLD (NUC011) domain	--	--	--
LOC123212095	47	45	28	569	560	705	1.0215	1.2062	0.5479	12.1841	12.4785	18.3889	0.9252	14.3505	3.95519192794574	6.36299489444782e-14	7.66242291897442e-12	NC_058139.1	6226677	6229434	-	LOC123212095	--	--	--	probable N-acetyltransferase HLS1 [Mangifera indica]	HLS1L_ARATH RecName: Full=Probable N-acetyltransferase HLS1-like; EC=2.3.1.-;	V4S0I4_CITCL RecName: Full=N-acetyltransferase domain-containing protein {ECO:0000259|PROSITE:PS51186};	--	GO:0016747,acyltransferase activity, transferring groups other than amino-acyl groups; GO:0008080,N-acetyltransferase activity; GO:0003674,molecular_function; GO:0003824,catalytic activity; GO:0016740,transferase activity; GO:0016746,acyltransferase activity; GO:0016407,acetyltransferase activity; GO:0016410,N-acyltransferase activity	PF00583.28:Acetyltransferase (GNAT) family	GNAT	TR	GNAT
LOC123226339	426	785	766	23	13	50	28.8816	65.6357	46.7537	1.5363	0.9036	4.0683	47.0903333333333	2.1694	-4.44006	6.54293152393199e-14	7.84981520713224e-12	NC_058145.1	16383227	16383745	+	LOC123226339	--	--	--	uncharacterized protein LOC123226339 [Mangifera indica]	--	A0A1R3GC17_COCAP SubName: Full=Uncharacterized protein {ECO:0000313|EMBL:OMO55606.1};	--	--	PF14009.9:PADRE domain	--	--	--
LOC123212096	1469	3100	2335	34457	34610	21794	27.5236	71.6314	39.3863	636.077	664.858	490.066	46.1804333333333	597.000166666667	3.6923777184592	6.57601630253176e-14	7.86028793080028e-12	NC_058139.1	2563886	2567551	+	LOC123212096	--	K00128 aldehyde dehydrogenase (NAD+) [EC:1.2.1.3] | (RefSeq) aldehyde dehydrogenase family 2 member B4, mitochondrial-like (A)	ko00010: Glycolysis / Gluconeogenesis; ko00053: Ascorbate and aldarate metabolism; ko00071: Fatty acid degradation; ko00280: Valine, leucine and isoleucine degradation; ko00310: Lysine degradation; ko00330: Arginine and proline metabolism; ko00340: Histidine metabolism; ko00380: Tryptophan metabolism; ko00410: beta-Alanine metabolism; ko00561: Glycerolipid metabolism; ko00620: Pyruvate metabolism…	aldehyde dehydrogenase family 2 member B4, mitochondrial-like [Mangifera indica]	AL2B4_ARATH RecName: Full=Aldehyde dehydrogenase family 2 member B4, mitochondrial; Short=ALDH2a; EC=1.2.1.3; Flags: Precursor;	A0A2S0S3Y3_VERFO SubName: Full=Aldehyde dehydrogenase family 2 member B4 {ECO:0000313|EMBL:AWA82040.1}; EC=1.2.1.3 {ECO:0000313|EMBL:AWA82040.1};	Aldehyde dehydrogenase	GO:0005829,cytosol; GO:0005759,mitochondrial matrix; GO:0005739,mitochondrion; GO:0004029,aldehyde dehydrogenase (NAD+) activity; GO:0005524,ATP binding; GO:0043878,glyceraldehyde-3-phosphate dehydrogenase (NAD+) (non-phosphorylating) activity; GO:0003674,molecular_function; GO:0003824,catalytic activity; GO:0004030,aldehyde dehydrogenase [NAD(P)+] activity; GO:0016491,oxidoreductase activity; GO…	PF00171.25:Aldehyde dehydrogenase family	--	--	--
LOC123222493	11401	55242	2747	422	121	80	207.749	1241.44	45.0641	7.5763	2.2606	1.7495	498.083	3.86213333333333	-7.01085	6.61823000853941e-14	7.88155487326909e-12	NC_058144.1	7146092	7148986	-	LOC123222493	--	K12742 isoprene synthase [EC:4.2.3.27] | (RefSeq) isoprene synthase, chloroplastic-like (A)	ko00900: Terpenoid backbone biosynthesis; ko01110: Biosynthesis of secondary metabolites	isoprene synthase, chloroplastic-like [Mangifera indica]	ISPS_POPAL RecName: Full=Isoprene synthase, chloroplastic {ECO:0000303|PubMed:15848197}; Short=PaIspS {ECO:0000303|PubMed:15848197}; EC=4.2.3.27 {ECO:0000269|PubMed:15848197}; Flags: Precursor;	A0A5C7HED4_9ROSI SubName: Full=Uncharacterized protein {ECO:0000313|EMBL:TXG55307.1};	--	GO:0009507,chloroplast; GO:0034009,isoprene synthase activity; GO:0000287,magnesium ion binding; GO:0071485,cellular response to absence of light; GO:0071482,cellular response to light stimulus; GO:0050993,dimethylallyl diphosphate metabolic process; GO:0016102,diterpenoid biosynthetic process; GO:0043612,isoprene biosynthetic process; GO:0009409,response to cold; GO:0009408,response to heat; GO:…	PF03936.19:Terpene synthase family, metal binding domain	--	--	--
LOC123215552	549	142	753	37	24	18	7.7956	2.4867	9.626	0.5176	0.3494	0.3067	6.6361	0.391233333333333	-4.08423	6.87479510658349e-14	8.15699494392532e-12	NC_058141.1	15106886	15113909	-	LOC123215552	--	K20867 galacturonosyltransferase 12/13/14/15 [EC:2.4.1.-] | (RefSeq) probable galacturonosyltransferase 15 isoform X1 (A)	--	probable galacturonosyltransferase 15 isoform X1 [Mangifera indica]	GAUTF_ARATH RecName: Full=Probable galacturonosyltransferase 15; EC=2.4.1.-;	A0A067F0N8_CITSI RecName: Full=Hexosyltransferase {ECO:0000256|RuleBase:RU362027}; EC=2.4.1.- {ECO:0000256|RuleBase:RU362027};	--	GO:0000139,Golgi membrane; GO:0016021,integral component of membrane; GO:0047262,polygalacturonate 4-alpha-galacturonosyltransferase activity; GO:0071555,cell wall organization; GO:0045489,pectin biosynthetic process; GO:0003674,molecular_function; GO:0003824,catalytic activity; GO:0008194,UDP-glycosyltransferase activity; GO:0016740,transferase activity; GO:0016757,glycosyltransferase activity; …	PF01501.23:Glycosyl transferase family 8	--	--	--
LOC123197642	132	201	91	5283	5886	1598	5.4836	10.2979	3.4034	216.234	250.703	79.6721	6.39496666666667	182.203	4.83246764773892	7.49386142006747e-14	8.85895200036035e-12	NC_058151.1	1684673	1685519	+	LOC123197642	--	--	--	uncharacterized protein PAM68-like [Mangifera indica]	Y5278_ARATH RecName: Full=Uncharacterized protein PAM68-like;	A0A6P5YAW4_DURZI SubName: Full=uncharacterized protein PAM68-like {ECO:0000313|RefSeq:XP_022737583.1};	--	GO:0009507,chloroplast; GO:0009535,chloroplast thylakoid membrane; GO:0016021,integral component of membrane; GO:0010258,NADH dehydrogenase complex (plastoquinone) assembly; GO:0008150,biological_process; GO:0009987,cellular process; GO:0010257,NADH dehydrogenase complex assembly; GO:0010275,NAD(P)H dehydrogenase complex assembly; GO:0016043,cellular component organization; GO:0022607,cellular co…	PF11947.11:Photosynthesis affected mutant 68	--	--	--
LOC123215983	549	232	510	65	32	43	13.6327	7.1049	11.4013	1.5903	0.8147	1.2815	10.7129666666667	1.22883333333333	-3.124	8.15197260390177e-14	9.60177415495336e-12	NC_058141.1	15524976	15526660	-	LOC123215983	--	K01051 pectinesterase [EC:3.1.1.11] | (RefSeq) putative pectinesterase 63 (A)	ko00040: Pentose and glucuronate interconversions; ko01100: Metabolic pathways	putative pectinesterase 63 [Mangifera indica]	PPME1_ARATH RecName: Full=Pectinesterase PPME1; Short=AtPPME1 {ECO:0000303|PubMed:16564517}; Short=PE PPME1; EC=3.1.1.11 {ECO:0000305|PubMed:16564517}; AltName: Full=Pectin methylesterase 9; Short=AtPME9; AltName: Full=Pectin methylesterase PPME1; AltName: Full=Protein POLLEN SPECIFIC PME 1; Flags: Precursor;	A0A5E4EXY9_PRUDU SubName: Full=PREDICTED: pectinesterase {ECO:0000313|EMBL:VVA18588.1};	--	GO:0005783,endoplasmic reticulum; GO:0005576,extracellular region; GO:0005794,Golgi apparatus; GO:0009505,plant-type cell wall; GO:0090406,pollen tube; GO:0045330,aspartyl esterase activity; GO:0052689,carboxylic ester hydrolase activity; GO:0030599,pectinesterase activity; GO:0042545,cell wall modification; GO:0050829,defense response to Gram-negative bacterium; GO:0045490,pectin catabolic proce…	PF01095.22:Pectinesterase	--	--	--
LOC123206456	3484	2026	2728	204	197	366	160.459	115.076	113.111	9.2569	9.3024	20.2302	129.548533333333	12.9298333333333	-3.32472	8.56446539123495e-14	1.00509451480482e-11	NC_058138.1	15696896	15697898	+	LOC123206456	--	--	--	non-specific lipid transfer protein GPI-anchored 6-like [Mangifera indica]	LTPG6_ARATH RecName: Full=Non-specific lipid transfer protein GPI-anchored 6 {ECO:0000303|PubMed:23893219}; Short=AtLTPG-6 {ECO:0000303|PubMed:23893219}; Short=Protein LTP-GPI-ANCHORED 6 {ECO:0000303|PubMed:23893219}; AltName: Full=Xylogen like protein 6 {ECO:0000303|PubMed:21558309}; Short=AtXYLP6 {ECO:0000303|PubMed:21558309}; Short=AtXYP12 {ECO:0000303|PubMed:21558309}; Flags: Precursor;	A0A067FA15_CITSI RecName: Full=AAI domain-containing protein {ECO:0000259|SMART:SM00499};	--	GO:0031225,anchored component of membrane; GO:0005634,nucleus; GO:0005886,plasma membrane; GO:0050832,defense response to fungus; GO:0006950,response to stress; GO:0006952,defense response; GO:0008150,biological_process; GO:0009605,response to external stimulus; GO:0009607,response to biotic stimulus; GO:0009620,response to fungus; GO:0043207,response to external biotic stimulus; GO:0044419,biolo…	PF14368.9:Probable lipid transfer	--	--	--
LOC123200143	2040	1290	1754	150	160	254	66.1575	51.5938	51.2099	4.7928	5.32	9.8859	56.3204	6.66623333333333	-3.07871	8.9283913608983e-14	1.04400715358794e-11	NC_058153.1	3629575	3631679	+	LOC123200143	--	--	--	tetraspanin-2-like [Mangifera indica]	TET2_ARATH RecName: Full=Tetraspanin-2;	A0A836Y6I9_9ROSI SubName: Full=Senescence-associated family protein {ECO:0000313|EMBL:KAG5243452.1};	--	GO:0016021,integral component of membrane; GO:0009506,plasmodesma; GO:0009734,auxin-activated signaling pathway; GO:0007154,cell communication; GO:0007165,signal transduction; GO:0008150,biological_process; GO:0009719,response to endogenous stimulus; GO:0009725,response to hormone; GO:0009733,response to auxin; GO:0009755,hormone-mediated signaling pathway; GO:0009987,cellular process; GO:0010033…	PF00335.23:Tetraspanin family	--	--	--
LOC123212528	634	1799	946	49	58	80	27.5752	96.4984	37.0422	2.0998	2.5864	4.1759	53.7052666666667	2.95403333333333	-4.18431	9.30291511102357e-14	1.08387357176196e-11	NC_058139.1	8780659	8781952	+	LOC123212528	--	K13993 HSP20 family protein | (RefSeq) 17.4 kDa class III heat shock protein (A)	ko04141: Protein processing in endoplasmic reticulum	17.4 kDa class III heat shock protein [Mangifera indica]	HS174_ARATH RecName: Full=17.4 kDa class III heat shock protein; AltName: Full=17.4 kDa heat shock protein 2; Short=AtHsp17.4B;	A0A8J4QTQ4_9ROSI RecName: Full=SHSP domain-containing protein {ECO:0000259|PROSITE:PS01031};	Molecular chaperone (small heat-shock protein Hsp26/Hsp42)	GO:0005737,cytoplasm; GO:0043621,protein self-association; GO:0051082,unfolded protein binding; GO:0071456,cellular response to hypoxia; GO:0051259,protein complex oligomerization; GO:0006457,protein folding; GO:0009408,response to heat; GO:0042542,response to hydrogen peroxide; GO:0009651,response to salt stress; GO:0003674,molecular_function; GO:0005488,binding; GO:0005515,protein binding; GO:0…	PF00011.24:Hsp20/alpha crystallin family	--	--	--
LOC123215333	17952	28214	18723	3306	3250	1834	200.149	387.941	187.929	36.3156	37.1509	24.54	258.673	32.6688333333333	-2.98514	9.74573186524519e-14	1.13138131110453e-11	NC_058141.1	18070849	18078374	-	LOC123215333	--	K12133 MYB-related transcription factor LHY | (RefSeq) protein LATE ELONGATED HYPOCOTYL-like (A)	ko04712: Circadian rhythm - plant	protein LATE ELONGATED HYPOCOTYL-like [Mangifera indica]	LHY_PETHY RecName: Full=Protein LATE ELONGATED HYPOCOTYL {ECO:0000303|PubMed:26124104}; Short=PhLHY {ECO:0000303|PubMed:26124104};	V4U1M4_CITCL SubName: Full=Uncharacterized protein {ECO:0000313|EMBL:ESR57950.1};	Zuotin and related molecular chaperones (DnaJ superfamily), contains DNA-binding domains	GO:0005634,nucleus; GO:0000976,transcription cis-regulatory region binding; GO:0007623,circadian rhythm; GO:0010597,green leaf volatile biosynthetic process; GO:0045892,negative regulation of DNA-templated transcription; GO:0042752,regulation of circadian rhythm; GO:0001067,transcription regulatory region nucleic acid binding; GO:0003674,molecular_function; GO:0003676,nucleic acid binding; GO:000…	PF00249.34:Myb-like DNA-binding domain	MYB-related	TF	MYB->MYB-related
novel.856	0	1	4	158	189	110	0	0.1544	0.4509	19.493	24.2649	16.531	0.201766666666667	20.0963	6.63809824567697	9.89676908126447e-14	1.14479723498082e-11	NC_058146.1	3177380	3177660	.	--	--	--	--	--	--	--	--	--	--	--	--	--
LOC123202234	1043	891	1315	100	190	142	61.1662	64.4413	69.4271	5.778	11.4242	9.9942	65.0115333333333	9.06546666666667	-2.84224	1.04561833261308e-13	1.20518715887222e-11	NC_058154.1	2099245	2099844	+	LOC123202234	--	--	--	uncharacterized protein LOC123202234 [Mangifera indica]	--	A0A5C7HL22_9ROSI RecName: Full=LEA_2 domain-containing protein {ECO:0000259|Pfam:PF03168};	--	GO:0016021,integral component of membrane; GO:0005575,cellular_component; GO:0016020,membrane; GO:0031224,intrinsic component of membrane; GO:0110165,cellular anatomical entity	PF03168.16:Late embryogenesis abundant protein	--	--	--
LOC123214855	157	117	251	11	18	17	8.0179	7.3689	11.5401	0.5535	0.9425	1.0419	8.97563333333333	0.845966666666667	-3.40734	1.06490755145843e-13	1.22305200740989e-11	NC_058140.1	10770684	10771372	-	LOC123214855	--	K14488 SAUR family protein | (RefSeq) auxin-induced protein 6B-like (A)	ko04075: Plant hormone signal transduction	auxin-induced protein 6B-like [Mangifera indica]	ARG7_VIGRR RecName: Full=Indole-3-acetic acid-induced protein ARG7;	A0A067K737_JATCU SubName: Full=Uncharacterized protein {ECO:0000313|EMBL:KDP27624.1};	--	GO:0009733,response to auxin; GO:0008150,biological_process; GO:0009719,response to endogenous stimulus; GO:0009725,response to hormone; GO:0010033,response to organic substance; GO:0042221,response to chemical; GO:0050896,response to stimulus	PF02519.17:Auxin responsive protein	--	--	--
LOC123204947	97	76	101	1847	1007	560	1.3032	1.2593	1.2216	24.4489	13.8713	9.0295	1.26136666666667	15.7832333333333	3.64533316556495	1.14198064241887e-13	1.30691990329021e-11	NC_058156.1	424147	427981	+	LOC123204947	--	--	--	UDP-N-acetylmuramoyl-L-alanyl-D-glutamate--2,6-diaminopimelate ligase MurE homolog, chloroplastic [Mangifera indica]	MURE_ARATH RecName: Full=UDP-N-acetylmuramoyl-L-alanyl-D-glutamate--2,6-diaminopimelate ligase MurE homolog, chloroplastic {ECO:0000305}; Short=AtMurE {ECO:0000303|PubMed:18036201}; AltName: Full=Protein ALBINO OR PALE-GREEN 13 {ECO:0000303|PubMed:18036201}; AltName: Full=Protein PIGMENT DEFECTIVE EMBRYO 316 {ECO:0000305}; Flags: Precursor;	V4TM99_CITCL SubName: Full=Uncharacterized protein {ECO:0000313|EMBL:ESR52775.1};	--	GO:0009507,chloroplast; GO:0042644,chloroplast nucleoid; GO:0016881,acid-amino acid ligase activity; GO:0005524,ATP binding; GO:0009058,biosynthetic process; GO:0051301,cell division; GO:0010020,chloroplast fission; GO:0009658,chloroplast organization; GO:0008360,regulation of cell shape; GO:0003674,molecular_function; GO:0003824,catalytic activity; GO:0016874,ligase activity; GO:0016879,ligase a…	PF08245.15:Mur ligase middle domain	--	--	--
LOC123223921	6611	7696	7950	1328	1484	1483	131.572	188.895	142.442	26.0401	30.2813	35.4219	154.303	30.5811	-2.33505	1.16914437104989e-13	1.33327902073828e-11	NC_058144.1	3334393	3338320	-	LOC123223921	--	K08678 UDP-glucuronate decarboxylase [EC:4.1.1.35] | (RefSeq) UDP-glucuronic acid decarboxylase 2-like (A)	ko00520: Amino sugar and nucleotide sugar metabolism; ko01100: Metabolic pathways; ko01250: Biosynthesis of nucleotide sugars	UDP-glucuronic acid decarboxylase 2-like [Mangifera indica]	UXS2_ARATH RecName: Full=UDP-glucuronic acid decarboxylase 2; EC=4.1.1.35 {ECO:0000269|PubMed:15655675}; AltName: Full=UDP-XYL synthase 2; AltName: Full=UDP-glucuronate decarboxylase 2; Short=UGD; Short=UXS-2; AltName: Full=dTDP-glucose 4-6-dehydratase homolog D18;	V4VW82_CITCL RecName: Full=UDP-glucuronate decarboxylase {ECO:0000256|ARBA:ARBA00012290}; EC=4.1.1.35 {ECO:0000256|ARBA:ARBA00012290};	dTDP-glucose 4-6-dehydratase/UDP-glucuronic acid decarboxylase	GO:0005737,cytoplasm; GO:0005768,endosome; GO:0005794,Golgi apparatus; GO:0032580,Golgi cisterna membrane; GO:0000139,Golgi membrane; GO:0000138,Golgi trans cisterna; GO:0016021,integral component of membrane; GO:0016020,membrane; GO:0005886,plasma membrane; GO:0005802,trans-Golgi network; GO:0008460,dTDP-glucose 4,6-dehydratase activity; GO:0070403,NAD+ binding; GO:0048040,UDP-glucuronate decarb…	PF16363.8:GDP-mannose 4,6 dehydratase	--	--	--
LOC123225174	3	16	0	944	1174	786	0.1655	1.0883	0	51.2955	66.3851	52.0253	0.417933333333333	56.5686333333333	7.08058567741651	1.19061053678806e-13	1.35297795259722e-11	NC_058145.1	1904972	1906674	+	LOC123225174	--	--	--	uncharacterized protein LOC123225174 [Mangifera indica]	--	A0A7J7DB67_TRIWF SubName: Full=Uncharacterized protein {ECO:0000313|EMBL:KAF5743551.1};	--	GO:0042752,regulation of circadian rhythm; GO:0009409,response to cold; GO:0007623,circadian rhythm; GO:0008150,biological_process; GO:0048511,rhythmic process; GO:0050789,regulation of biological process; GO:0065007,biological regulation; GO:0006950,response to stress; GO:0009266,response to temperature stimulus; GO:0009628,response to abiotic stimulus; GO:0050896,response to stimulus	--	--	--	--
LOC123201726	18	22	20	387	219	186	0.3184	0.48	0.3185	6.7453	3.9722	3.949	0.3723	4.88883333333333	3.71495270153794	1.2451897947614e-13	1.41003544723982e-11	NC_058138.1	19542461	19545393	+	LOC123201726	--	--	--	AT-hook motif nuclear-localized protein 13-like isoform X1 [Mangifera indica]	AHL11_ARATH RecName: Full=AT-hook motif nuclear-localized protein 11 {ECO:0000312|EMBL:FAA00282.1};	A0A3N7FJP6_POPTR RecName: Full=AT-hook motif nuclear-localized protein {ECO:0000256|RuleBase:RU367031};	--	GO:0005634,nucleus; GO:0003680,minor groove of adenine-thymine-rich DNA binding; GO:0000217,DNA secondary structure binding; GO:0003674,molecular_function; GO:0003676,nucleic acid binding; GO:0003677,DNA binding; GO:0005488,binding; GO:0097159,organic cyclic compound binding; GO:1901363,heterocyclic compound binding; GO:0005575,cellular_component; GO:0005622,intracellular anatomical structure; GO…	PF03479.18:Plants and Prokaryotes Conserved (PCC) domain	--	--	--
LOC123228984	409	423	378	4621	3238	2281	6.5031	8.2946	5.4108	72.3906	52.786	43.5268	6.73616666666667	56.2344666666667	3.06145490453574	1.32845345438256e-13	1.49906217948561e-11	NC_058147.1	3603689	3606237	+	LOC123228984	--	--	--	U-box domain-containing protein 30-like [Mangifera indica]	PUB30_ARATH RecName: Full=U-box domain-containing protein 30; EC=2.3.2.27; AltName: Full=Plant U-box protein 30; AltName: Full=RING-type E3 ubiquitin transferase PUB30 {ECO:0000305};	A0A5C7H8Q5_9ROSI RecName: Full=RING-type E3 ubiquitin transferase {ECO:0000256|ARBA:ARBA00012483}; EC=2.3.2.27 {ECO:0000256|ARBA:ARBA00012483};	--	GO:0061630,ubiquitin protein ligase activity; GO:0071472,cellular response to salt stress; GO:1901001,negative regulation of response to salt stress; GO:0003674,molecular_function; GO:0003824,catalytic activity; GO:0004842,ubiquitin-protein transferase activity; GO:0016740,transferase activity; GO:0019787,ubiquitin-like protein transferase activity; GO:0061659,ubiquitin-like protein ligase activi…	PF04564.18:U-box domain	--	--	--
LOC123215944	742	514	1393	115	75	124	14.7339	12.5874	24.9024	2.2499	1.5269	2.9551	17.4079	2.24396666666667	-2.95562	1.45262330286024e-13	1.63346731195848e-11	NC_058141.1	18244214	18245985	-	LOC123215944	--	K13422 transcription factor MYC2 | (RefSeq) LOW QUALITY PROTEIN: transcription factor MYC2-like (A)	ko04016: MAPK signaling pathway - plant; ko04075: Plant hormone signal transduction	transcription factor MYC2-like [Mangifera indica]	BH014_ARATH RecName: Full=Transcription factor bHLH14; AltName: Full=Basic helix-loop-helix protein 14; Short=AtbHLH14; Short=bHLH 14; AltName: Full=Transcription factor EN 33; AltName: Full=bHLH transcription factor bHLH014;	A0A5C7I202_9ROSI RecName: Full=BHLH domain-containing protein {ECO:0000259|PROSITE:PS50888};	--	GO:0005737,cytoplasm; GO:0005634,nucleus; GO:0003700,DNA-binding transcription factor activity; GO:0046983,protein dimerization activity; GO:0000976,transcription cis-regulatory region binding; GO:0010629,negative regulation of gene expression; GO:0006355,regulation of DNA-templated transcription; GO:0003674,molecular_function; GO:0140110,transcription regulator activity; GO:0005488,binding; GO:0…	PF14215.9:bHLH-MYC and R2R3-MYB transcription factors N-terminal	bHLH	TF	bHLH
LOC123219287	43	59	44	1910	817	460	0.5548	0.9389	0.5111	24.2815	10.8084	7.1234	0.668266666666667	14.0711	4.39616739065884	1.66528296868593e-13	1.86609990445837e-11	NC_058142.1	4827337	4838731	-	LOC123219287	--	K08835 serine/threonine-protein kinase OSR1/STK39 [EC:2.7.11.1] | (RefSeq) serine/threonine-protein kinase BLUS1 isoform X1 (A)	--	serine/threonine-protein kinase BLUS1 isoform X3 [Mangifera indica]	BLUS1_ARATH RecName: Full=Serine/threonine-protein kinase BLUS1; EC=2.7.11.1; AltName: Full=Protein BLUE LIGHT SIGNALING 1;	A0A2H5PAT3_CITUN RecName: Full=Protein kinase domain-containing protein {ECO:0000259|PROSITE:PS50011};	Ste20-like serine/threonine protein kinase	GO:0005829,cytosol; GO:0005524,ATP binding; GO:0046872,metal ion binding; GO:0106310,protein serine kinase activity; GO:0004674,protein serine/threonine kinase activity; GO:0006468,protein phosphorylation; GO:1902456,regulation of stomatal opening; GO:0000166,nucleotide binding; GO:0003674,molecular_function; GO:0005488,binding; GO:0017076,purine nucleotide binding; GO:0030554,adenyl nucleotide b…	PF00069.28:Protein kinase domain	--	--	--
LOC123207823	720	1297	1472	198	80	65	9.986	22.1849	18.3798	2.7057	1.1376	1.0819	16.8502333333333	1.64173333333333	-3.35948	1.69081118633379e-13	1.88815049884257e-11	NW_025401200.1	67077	70154	-	LOC123207823	--	K04079 molecular chaperone HtpG | (RefSeq) heat shock protein 83-like (A)	ko04141: Protein processing in endoplasmic reticulum; ko04626: Plant-pathogen interaction	heat shock protein 83-like [Mangifera indica]	HSP83_IPONI RecName: Full=Heat shock protein 83;	A0A4P8DYN5_9ROSI SubName: Full=Heat shock protein 90 {ECO:0000313|EMBL:QCO43320.1};	Molecular chaperone (HSP90 family)	GO:0005737,cytoplasm; GO:0005524,ATP binding; GO:0016887,ATP hydrolysis activity; GO:0051082,unfolded protein binding; GO:0006457,protein folding; GO:0000166,nucleotide binding; GO:0003674,molecular_function; GO:0005488,binding; GO:0017076,purine nucleotide binding; GO:0030554,adenyl nucleotide binding; GO:0032553,ribonucleotide binding; GO:0032555,purine ribonucleotide binding; GO:0032559,adenyl…	PF00183.21:Hsp90 protein	--	--	--
LOC123206627	698	283	1195	36	59	55	18.411	9.2059	28.377	0.9356	1.5956	1.7411	18.6646333333333	1.4241	-3.71218	1.90722285287512e-13	2.12247597002893e-11	NW_025401136.1	177114	178936	-	LOC123206627	--	K00083 cinnamyl-alcohol dehydrogenase [EC:1.1.1.195] | (RefSeq) cinnamyl alcohol dehydrogenase 1-like (A)	ko00940: Phenylpropanoid biosynthesis; ko01100: Metabolic pathways; ko01110: Biosynthesis of secondary metabolites	cinnamyl alcohol dehydrogenase 1-like [Mangifera indica]	CADH1_OCIBA RecName: Full=Cinnamyl alcohol dehydrogenase 1; Short=CAD 1; Short=ObaCAD1; EC=1.1.1.195;	A0A5J5B0V3_9ASTE RecName: Full=PKS_ER domain-containing protein {ECO:0000259|SMART:SM00829};	Alcohol dehydrogenase, class V	GO:0045551,cinnamyl-alcohol dehydrogenase activity; GO:0052747,sinapyl alcohol dehydrogenase activity; GO:0008270,zinc ion binding; GO:0009699,phenylpropanoid biosynthetic process; GO:0003674,molecular_function; GO:0003824,catalytic activity; GO:0016491,oxidoreductase activity; GO:0016614,oxidoreductase activity, acting on CH-OH group of donors; GO:0016616,oxidoreductase activity, acting on the C…	PF08240.15:Alcohol dehydrogenase GroES-like domain	--	--	--
LOC123197349	350	396	363	18	26	42	3.1154	4.3472	2.9089	0.1579	0.2373	0.4487	3.45716666666667	0.2813	-3.61941	2.06358129402302e-13	2.28858965986272e-11	NC_058151.1	11267841	11276988	+	LOC123197349	--	K26154 RAB11-binding protein RELCH | (RefSeq) RAB11-binding protein RELCH homolog isoform X1 (A)	--	RAB11-binding protein RELCH homolog isoform X1 [Mangifera indica]	--	V4S8X9_CITCL SubName: Full=Uncharacterized protein {ECO:0000313|EMBL:ESR43963.1};	Protein phosphatase 2A regulatory subunit A and related proteins	GO:0005802,trans-Golgi network; GO:0032367,intracellular cholesterol transport; GO:0006810,transport; GO:0006869,lipid transport; GO:0008150,biological_process; GO:0009987,cellular process; GO:0010876,lipid localization; GO:0015850,organic hydroxy compound transport; GO:0015918,sterol transport; GO:0030301,cholesterol transport; GO:0032365,intracellular lipid transport; GO:0032366,intracellular s…	PF02985.25:HEAT repeat	--	--	--
LOC123205270	119	121	172	1073	793	607	2.0218	2.5354	2.6309	17.9617	13.8139	12.3772	2.39603333333333	14.7176	2.61882254621728	2.30704350171215e-13	2.54983612776563e-11	NW_025401095.1	701968	706899	-	LOC123205270	--	K14793 ribosomal RNA-processing protein 9 | (RefSeq) U3 snoRNP-associated protein-like EMB2271 (A)	--	U3 snoRNP-associated protein-like EMB2271 [Mangifera indica]	YAOL_ARATH RecName: Full=U3 snoRNP-associated protein-like EMB2271 {ECO:0000305}; AltName: Full=Protein EMBRYO DEFECTIVE 2271 {ECO:0000305}; AltName: Full=Protein YAO-like {ECO:0000305};	A0A067GIZ6_CITSI SubName: Full=Uncharacterized protein {ECO:0000313|EMBL:KDO75296.1};	U3 snoRNP-associated protein (contains WD40 repeats)	GO:0080008,Cul4-RING E3 ubiquitin ligase complex; GO:0005730,nucleolus; GO:0032040,small-subunit processome; GO:0030515,snoRNA binding; GO:0034511,U3 snoRNA binding; GO:0006364,rRNA processing; GO:0003674,molecular_function; GO:0003676,nucleic acid binding; GO:0003723,RNA binding; GO:0005488,binding; GO:0097159,organic cyclic compound binding; GO:1901363,heterocyclic compound binding; GO:0006139,…	PF00400.35:WD domain, G-beta repeat	--	--	--
LOC123220364	420	178	445	34	42	38	11.2298	5.8695	10.7117	0.8957	1.1514	1.2194	9.27033333333333	1.08883333333333	-3.08984	2.35973934725694e-13	2.59917638068339e-11	NC_058143.1	18154245	18156059	+	LOC123220364	--	--	--	SH3 domain-containing protein C23A1.17-like [Mangifera indica]	LTG25_ARATH RecName: Full=Non-specific lipid transfer protein GPI-anchored 25 {ECO:0000303|PubMed:23893219}; Short=AtLTPG-25 {ECO:0000303|PubMed:23893219}; Short=Protein LTP-GPI-ANCHORED 25 {ECO:0000303|PubMed:23893219}; Flags: Precursor;	A0A067G4J7_CITSI RecName: Full=AAI domain-containing protein {ECO:0000259|Pfam:PF14368};	--	GO:0031225,anchored component of membrane; GO:0005886,plasma membrane; GO:0005575,cellular_component; GO:0016020,membrane; GO:0031224,intrinsic component of membrane; GO:0110165,cellular anatomical entity; GO:0071944,cell periphery	PF14368.9:Probable lipid transfer	--	--	--
LOC123230062	6	6	9	131	151	217	0.2703	0.3334	0.365	5.815	6.9751	11.7333	0.3229	8.17446666666667	4.66196526069847	2.49758718631264e-13	2.74165412462136e-11	NC_058147.1	10997302	10998082	+	LOC123230062	--	K09286 EREBP-like factor | (RefSeq) ethylene-responsive transcription factor ERF010-like (A)	--	ethylene-responsive transcription factor ERF019-like [Mangifera indica]	ERF19_ARATH RecName: Full=Ethylene-responsive transcription factor ERF019;	A0A6P5WUQ4_DURZI SubName: Full=ethylene-responsive transcription factor ERF020-like {ECO:0000313|RefSeq:XP_022719809.1};	--	GO:0005737,cytoplasm; GO:0005634,nucleus; GO:0003700,DNA-binding transcription factor activity; GO:0000976,transcription cis-regulatory region binding; GO:0042631,cellular response to water deprivation; GO:0009873,ethylene-activated signaling pathway; GO:0009620,response to fungus; GO:0003674,molecular_function; GO:0140110,transcription regulator activity; GO:0001067,transcription regulatory regi…	PF00847.23:AP2 domain	AP2/ERF-ERF	TF	AP2/ERF->AP2/ERF-ERF
LOC123230374	190	485	310	6821	6163	3587	10.5283	33.144	15.4647	372.393	350.14	238.545	19.7123333333333	320.359433333333	4.02252101058371	2.68884083073782e-13	2.94159186882717e-11	NC_058148.1	7611571	7612529	-	LOC123230374	--	--	--	light-regulated protein, chloroplastic-like [Mangifera indica]	LIRP1_ARATH RecName: Full=Light-regulated protein 1, chloroplastic {ECO:0000303|PubMed:8932388}; AltName: Full=Protein CCR-LIKE, chloroplastic {ECO:0000303|PubMed:16055688}; Flags: Precursor;	A0A5C7GWZ5_9ROSI SubName: Full=Uncharacterized protein {ECO:0000313|EMBL:TXG49039.1};	--	GO:0009507,chloroplast; GO:0009941,chloroplast envelope; GO:0009570,chloroplast stroma; GO:0098807,chloroplast thylakoid membrane protein complex; GO:0005829,cytosol; GO:0007623,circadian rhythm; GO:0008150,biological_process; GO:0048511,rhythmic process; GO:0005575,cellular_component; GO:0005622,intracellular anatomical structure; GO:0005737,cytoplasm; GO:0009536,plastid; GO:0043226,organelle; G…	PF07207.14:Light regulated protein Lir1	--	--	--
LOC123210302	2547	4477	2745	39	38	176	39.359	85.3221	38.1886	0.5938	0.6021	3.2641	54.2899	1.48666666666667	-5.19053	2.7282532297889e-13	2.9746255569249e-11	NC_058139.1	9339184	9343484	-	LOC123210302	--	K17471 sulfate transporter 3 | (RefSeq) sulfate transporter 3.1-like (A)	--	sulfate transporter 3.1-like [Mangifera indica]	SUT31_ARATH RecName: Full=Sulfate transporter 3.1; AltName: Full=AST12; AltName: Full=AtST1;	A0A2C9VUA9_MANES RecName: Full=STAS domain-containing protein {ECO:0000259|PROSITE:PS50801};	Sulfate/bicarbonate/oxalate exchanger SAT-1 and related transporters (SLC26 family)	GO:0009507,chloroplast; GO:0005887,integral component of plasma membrane; GO:0015301,NA; GO:0008271,secondary active sulfate transmembrane transporter activity; GO:0015116,sulfate transmembrane transporter activity; GO:0015293,symporter activity; GO:0008272,sulfate transport; GO:0003674,molecular_function; GO:0005215,transporter activity; GO:0008509,anion transmembrane transporter activity; GO:00…	PF00916.23:Sulfate permease family	--	--	--
LOC123206867	260	138	299	26	29	30	10.1764	6.6613	10.5358	1.0026	1.1638	1.4092	9.1245	1.19186666666667	-2.93652	2.89197523022048e-13	3.14251571060288e-11	NW_025401144.1	173899	175817	+	LOC123206867	--	--	--	tetraspanin-2-like [Mangifera indica]	TET2_ARATH RecName: Full=Tetraspanin-2;	A0A836Y6I9_9ROSI SubName: Full=Senescence-associated family protein {ECO:0000313|EMBL:KAG5243452.1};	--	GO:0016021,integral component of membrane; GO:0009506,plasmodesma; GO:0009734,auxin-activated signaling pathway; GO:0007154,cell communication; GO:0007165,signal transduction; GO:0008150,biological_process; GO:0009719,response to endogenous stimulus; GO:0009725,response to hormone; GO:0009733,response to auxin; GO:0009755,hormone-mediated signaling pathway; GO:0009987,cellular process; GO:0010033…	PF00335.23:Tetraspanin family	--	--	--
LOC123195711	1126	1346	1268	299	272	173	32.2116	47.4873	32.6564	8.4274	7.9779	5.9396	37.4517666666667	7.4483	-2.33005	3.07376222354938e-13	3.32884322955064e-11	NC_058150.1	9039098	9042273	+	LOC123195711	--	K15033 peptidyl-tRNA hydrolase ICT1 [EC:3.1.1.29] | (RefSeq) peptidyl-tRNA hydrolase ICT1, mitochondrial (A)	--	peptidyl-tRNA hydrolase ICT1, mitochondrial [Mangifera indica]	--	A0A067FKQ4_CITSI RecName: Full=RF_PROK_I domain-containing protein {ECO:0000259|PROSITE:PS00745};	Predicted peptidyl-tRNA hydrolase	GO:0003747,translation release factor activity; GO:0003674,molecular_function; GO:0003676,nucleic acid binding; GO:0005488,binding; GO:0008079,translation termination factor activity; GO:0008135,translation factor activity, RNA binding; GO:0045182,translation regulator activity; GO:0090079,translation regulator activity, nucleic acid binding; GO:0097159,organic cyclic compound binding; GO:1901363…	PF00472.23:RF-1 domain	--	--	--
LOC123214376	181	340	335	21	15	30	5.897	13.6613	9.826	0.6741	0.5011	1.173	9.79476666666667	0.782733333333333	-3.64542	3.24884265912522e-13	3.5012471811857e-11	NC_058140.1	20333579	20334658	-	LOC123214376	--	--	--	BAG family molecular chaperone regulator 6-like [Mangifera indica]	BAG5_ARATH RecName: Full=BAG family molecular chaperone regulator 5, mitochondrial; AltName: Full=Bcl-2-associated athanogene 5; Flags: Precursor;	A0A5C7HG36_9ROSI RecName: Full=BAG domain-containing protein {ECO:0000259|PROSITE:PS51035};	--	GO:0005739,mitochondrion; GO:0005516,calmodulin binding; GO:0051087,chaperone binding; GO:0006457,protein folding; GO:0003674,molecular_function; GO:0005488,binding; GO:0005515,protein binding; GO:0008150,biological_process; GO:0009987,cellular process; GO:0005575,cellular_component; GO:0005622,intracellular anatomical structure; GO:0005737,cytoplasm; GO:0043226,organelle; GO:0043227,membrane-bou…	PF02179.19:BAG domain	--	--	--
LOC123210439	847	271	1185	28	48	55	17.8783	7.0546	22.5184	0.5823	1.0388	1.3933	15.8171	1.0048	-3.9765	3.25465297417566e-13	3.5012471811857e-11	NC_058139.1	21134026	21135937	-	LOC123210439	--	--	--	uncharacterized protein LOC123210439 [Mangifera indica]	--	A0A5C7ISQ4_9ROSI SubName: Full=Uncharacterized protein {ECO:0000313|EMBL:TXG72148.1};	--	--	PF04720.15:PDDEXK-like family of unknown function	--	--	--
LOC123197796	140	90	182	1412	1093	653	1.6279	1.2907	1.9053	16.1768	13.0309	9.1129	1.60796666666667	12.7735333333333	2.98984824464099	3.36008476362094e-13	3.6026583247953e-11	NC_058151.1	1340971	1360358	+	LOC123197796	--	K22530 ATPase family AAA domain-containing protein 1 [EC:3.6.1.-] | (RefSeq) outer mitochondrial transmembrane helix translocase-like (A)	--	uncharacterized protein LOC123197796 isoform X1 [Mangifera indica]	KTNA1_ARATH RecName: Full=Katanin p60 ATPase-containing subunit A1 {ECO:0000255|HAMAP-Rule:MF_03023}; Short=Katanin p60 subunit A1 {ECO:0000255|HAMAP-Rule:MF_03023}; EC=5.6.1.1 {ECO:0000255|HAMAP-Rule:MF_03023}; AltName: Full=CAD ATPase; AltName: Full=Katanin-1 {ECO:0000303|PubMed:11283338}; Short=AtKTN1 {ECO:0000303|PubMed:11283338}; AltName: Full=Katanin-like microtubule-severing protein {ECO:0…	A0A6J0ZJ38_9ROSI SubName: Full=uncharacterized protein LOC110409648 isoform X1 {ECO:0000313|RefSeq:XP_021274752.1};	AAA+-type ATPase	GO:0005737,cytoplasm; GO:0005874,microtubule; GO:0015630,microtubule cytoskeleton; GO:0005524,ATP binding; GO:0016887,ATP hydrolysis activity; GO:0016853,isomerase activity; GO:0008017,microtubule binding; GO:0008568,microtubule severing ATPase activity; GO:0043622,cortical microtubule organization; GO:0000226,microtubule cytoskeleton organization; GO:0051013,microtubule severing; GO:0009825,mult…	PF00004.32:ATPase family associated with various cellular activities (AAA)	--	--	--
LOC123225095	1496	547	1645	47	87	108	51.1558	23.068	50.6413	1.5835	3.0502	4.4322	41.6217	3.02196666666667	-3.78378	3.42699688933821e-13	3.66223412614609e-11	NC_058145.1	8421339	8422367	+	LOC123225095	--	--	--	NDR1/HIN1-like protein 13 [Mangifera indica]	NHL13_ARATH RecName: Full=NDR1/HIN1-like protein 13 {ECO:0000303|PubMed:26206852};	A0A6A6LJ05_HEVBR RecName: Full=LEA_2 domain-containing protein {ECO:0000259|Pfam:PF03168};	--	GO:0016021,integral component of membrane; GO:0005886,plasma membrane; GO:0009506,plasmodesma; GO:0042742,defense response to bacterium; GO:0006950,response to stress; GO:0006952,defense response; GO:0008150,biological_process; GO:0009605,response to external stimulus; GO:0009607,response to biotic stimulus; GO:0009617,response to bacterium; GO:0043207,response to external biotic stimulus; GO:004…	PF03168.16:Late embryogenesis abundant protein	--	--	--
LOC123219231	116	167	119	1985	1317	1013	1.4377	2.5526	1.3278	24.2394	16.7357	15.068	1.7727	18.6810333333333	3.39755394945262	3.53940572405402e-13	3.76987593836288e-11	NC_058142.1	14618638	14633651	-	LOC123219231	--	K17680 twinkle protein [EC:5.6.2.3] | (RefSeq) twinkle homolog protein, chloroplastic/mitochondrial isoform X1 (A)	--	twinkle homolog protein, chloroplastic/mitochondrial isoform X1 [Mangifera indica]	TWIH_ARATH RecName: Full=Twinkle homolog protein, chloroplastic/mitochondrial; AltName: Full=DNA helicase; EC=3.6.4.12; AltName: Full=DNA primase; EC=2.7.7.-; Flags: Precursor;	A0A1Q3BCU3_CEPFO SubName: Full=AAA_25 domain-containing protein/Toprim_4 domain-containing protein {ECO:0000313|EMBL:GAV65613.1};	--	GO:0009507,chloroplast; GO:0005739,mitochondrion; GO:0043139,5'-3' DNA helicase activity; GO:0005524,ATP binding; GO:0016887,ATP hydrolysis activity; GO:0003678,DNA helicase activity; GO:0003896,DNA primase activity; GO:0046872,metal ion binding; GO:0003697,single-stranded DNA binding; GO:0009260,ribonucleotide biosynthetic process; GO:0003674,molecular_function; GO:0003824,catalytic activity; GO…	PF13662.9:Toprim domain	--	--	--
LOC123215015	100	93	250	5391	2837	1058	1.012	1.1607	2.2777	53.7517	29.4359	12.8497	1.48346666666667	32.0124333333333	4.43158792828291	3.63452429254477e-13	3.85845402938478e-11	NC_058140.1	19631821	19637538	-	LOC123215015	--	K13436 pto-interacting protein 1 [EC:2.7.11.1] | (RefSeq) PTI1-like tyrosine-protein kinase 1 (A)	ko04626: Plant-pathogen interaction	probable LRR receptor-like serine/threonine-protein kinase At1g67720 [Mangifera indica]	Y1677_ARATH RecName: Full=Probable LRR receptor-like serine/threonine-protein kinase At1g67720; EC=2.7.11.1; Flags: Precursor;	A0A067H2X8_CITSI RecName: Full=Protein kinase domain-containing protein {ECO:0000259|PROSITE:PS50011};	--	GO:0016021,integral component of membrane; GO:0005524,ATP binding; GO:0106310,protein serine kinase activity; GO:0004674,protein serine/threonine kinase activity; GO:0006468,protein phosphorylation; GO:0000166,nucleotide binding; GO:0003674,molecular_function; GO:0005488,binding; GO:0017076,purine nucleotide binding; GO:0030554,adenyl nucleotide binding; GO:0032553,ribonucleotide binding; GO:0032…	PF12819.10:Malectin-like domain	--	--	--
LOC123197640	290	110	362	26	25	17	5.448	2.5485	6.1224	0.4812	0.4815	0.3833	4.7063	0.448666666666667	-3.39088	3.66278475586679e-13	3.87570663692095e-11	NC_058151.1	2842701	2845697	-	LOC123197640	--	K20495 long-chain fatty acid omega-monooxygenase [EC:1.14.14.80] | (RefSeq) cytochrome P450 704B1 (A)	ko00071: Fatty acid degradation; ko00073: Cutin, suberine and wax biosynthesis; ko01100: Metabolic pathways	cytochrome P450 704C1-like isoform X1 [Mangifera indica]	C04C1_PINTA RecName: Full=Cytochrome P450 704C1; EC=1.14.-.-; AltName: Full=Cytochrome P450 CYPD;	A0A5C7INE6_9ROSI SubName: Full=Uncharacterized protein {ECO:0000313|EMBL:TXG70791.1};	Cytochrome P450 CYP4/CYP19/CYP26 subfamilies	GO:0016021,integral component of membrane; GO:0020037,heme binding; GO:0005506,iron ion binding; GO:0004497,monooxygenase activity; GO:0016705,oxidoreductase activity, acting on paired donors, with incorporation or reduction of molecular oxygen; GO:0003674,molecular_function; GO:0005488,binding; GO:0046906,tetrapyrrole binding; GO:0097159,organic cyclic compound binding; GO:1901363,heterocyclic c…	PF00067.25:Cytochrome P450	--	--	--
LOC123227269	18739	15519	24012	4296	5329	2802	1234.76	1261.13	1424.43	278.901	360.021	221.585	1306.78	286.835566666667	-2.18771	3.74501519411139e-13	3.94976716861297e-11	NC_058146.1	12429936	12430644	+	LOC123227269	--	K02698 photosystem I subunit X | (RefSeq) photosystem I reaction center subunit psaK, chloroplastic-like (A)	ko00195: Photosynthesis; ko01100: Metabolic pathways	photosystem I reaction center subunit psaK, chloroplastic-like [Mangifera indica]	PSAK_ARATH RecName: Full=Photosystem I reaction center subunit psaK, chloroplastic; AltName: Full=PSI-K; AltName: Full=Photosystem I subunit X; Flags: Precursor;	A0A6P6ABD5_DURZI RecName: Full=PSI-K {ECO:0000256|ARBA:ARBA00033430}; AltName: Full=Photosystem I subunit X {ECO:0000256|ARBA:ARBA00031124};	--	GO:0009507,chloroplast; GO:0009534,chloroplast thylakoid; GO:0009535,chloroplast thylakoid membrane; GO:0016021,integral component of membrane; GO:0005634,nucleus; GO:0009522,photosystem I; GO:0009579,thylakoid; GO:0015979,photosynthesis; GO:0008150,biological_process; GO:0008152,metabolic process; GO:0009987,cellular process; GO:0044237,cellular metabolic process; GO:0005575,cellular_component; …	PF01241.21:Photosystem I psaG / psaK	--	--	--
LOC123229831	8	14	9	584	204	166	0.0824	0.1779	0.0835	5.9286	2.1551	2.0527	0.1146	3.3788	4.8818320069327	3.83931575021332e-13	4.03603378523239e-11	NC_058147.1	9170478	9175187	-	LOC123229831	--	--	--	protein WHAT'S THIS FACTOR 9, mitochondrial isoform X1 [Mangifera indica]	WTF9_ARATH RecName: Full=Protein WHAT'S THIS FACTOR 9, mitochondrial {ECO:0000303|PubMed:22060106}; Flags: Precursor;	A0A5C7H8T8_9ROSI RecName: Full=PORR domain-containing protein {ECO:0000259|Pfam:PF11955};	--	GO:0005739,mitochondrion; GO:0003723,RNA binding; GO:0017004,cytochrome complex assembly; GO:0000373,Group II intron splicing; GO:0006397,mRNA processing; GO:0003674,molecular_function; GO:0003676,nucleic acid binding; GO:0005488,binding; GO:0097159,organic cyclic compound binding; GO:1901363,heterocyclic compound binding; GO:0008150,biological_process; GO:0009987,cellular process; GO:0016043,cel…	PF11955.11:Plant organelle RNA recognition domain	--	--	--
LOC123208845	1331	1627	1194	258	209	109	39.8244	60.0368	32.1626	7.6057	6.4115	3.9141	44.0079333333333	5.9771	-2.88025	3.88395457911067e-13	4.06970344583242e-11	NC_058138.1	14637682	14639546	+	LOC123208845	--	--	--	chaperonin-like RbcX protein 2, chloroplastic isoform X1 [Mangifera indica]	RBCX2_ARATH RecName: Full=Chaperonin-like RbcX protein 2, chloroplastic {ECO:0000303|PubMed:21922322}; Short=AtRBCX2 {ECO:0000303|PubMed:21922322}; Flags: Precursor;	A0A067JQ23_JATCU SubName: Full=Uncharacterized protein {ECO:0000313|EMBL:KDP22095.1};	--	GO:0009570,chloroplast stroma; GO:0044183,protein folding chaperone; GO:0015977,carbon fixation; GO:0061077,chaperone-mediated protein folding; GO:0015979,photosynthesis; GO:0110102,ribulose bisphosphate carboxylase complex assembly; GO:0003674,molecular_function; GO:0008150,biological_process; GO:0008152,metabolic process; GO:0071704,organic substance metabolic process; GO:0006457,protein foldin…	PF02341.18:RbcX protein	--	--	--
LOC123210018	28	36	42	1108	501	277	0.3139	0.4977	0.4239	12.237	5.758	3.7265	0.411833333333333	7.2405	4.13595681755813	4.26741718397961e-13	4.45703413522893e-11	NC_058139.1	21080646	21083784	+	LOC123210018	--	--	--	pentatricopeptide repeat-containing protein At3g23020-like [Mangifera indica]	PP250_ARATH RecName: Full=Pentatricopeptide repeat-containing protein At3g23020;	A0A5C7IS50_9ROSI SubName: Full=Uncharacterized protein {ECO:0000313|EMBL:TXG72160.1};	FOG: PPR repeat	GO:0009507,chloroplast; GO:1904821,chloroplast disassembly; GO:0006355,regulation of DNA-templated transcription; GO:0010343,singlet oxygen-mediated programmed cell death; GO:0006996,organelle organization; GO:0008150,biological_process; GO:0009657,plastid organization; GO:0009658,chloroplast organization; GO:0009987,cellular process; GO:0016043,cellular component organization; GO:0022411,cellula…	PF13041.9:PPR repeat family	--	--	--
LOC123205488	843	550	897	120	135	150	19.4508	15.6506	18.6328	2.728	3.1936	4.1537	17.9114	3.35843333333333	-2.41502	4.51021921381849e-13	4.69542918346981e-11	NW_025401100.1	336086	338426	-	LOC123205488	--	K14595 abscisate beta-glucosyltransferase [EC:2.4.1.263] | (RefSeq) abscisate beta-glucosyltransferase-like (A)	ko00906: Carotenoid biosynthesis; ko01100: Metabolic pathways; ko01110: Biosynthesis of secondary metabolites	UDP-glycosyltransferase 73C4-like [Mangifera indica]	SCGT_TOBAC RecName: Full=Scopoletin glucosyltransferase; EC=2.4.1.128; AltName: Full=Phenylpropanoid:glucosyltransferase 1;	A0A5C7H6Y2_9ROSI SubName: Full=Uncharacterized protein {ECO:0000313|EMBL:TXG52798.1};	UDP-glucuronosyl and UDP-glucosyl transferase	GO:0042802,identical protein binding; GO:0050275,scopoletin glucosyltransferase activity; GO:0003674,molecular_function; GO:0005488,binding; GO:0005515,protein binding; GO:0003824,catalytic activity; GO:0008194,UDP-glycosyltransferase activity; GO:0016740,transferase activity; GO:0016757,glycosyltransferase activity; GO:0016758,hexosyltransferase activity; GO:0035251,UDP-glucosyltransferase activ…	PF00201.21:UDP-glucoronosyl and UDP-glucosyl transferase	--	--	--
LOC123215081	4554	5912	6288	39159	58822	40594	237.745	380.638	295.534	2014.18	3148.49	2543.4	304.638933333333	2568.69326666667	3.07586238771518	4.64620656062865e-13	4.8214477276903e-11	NC_058140.1	11618726	11619694	+	LOC123215081	--	K13195 cold-inducible RNA-binding protein | (RefSeq) glycine-rich RNA-binding protein GRP2A-like (A)	--	glycine-rich RNA-binding protein GRP2A-like [Mangifera indica]	RBG7_ARATH RecName: Full=Glycine-rich RNA-binding protein 7 {ECO:0000303|PubMed:11809873, ECO:0000303|PubMed:16207746}; Short=AtGR-RBP7 {ECO:0000303|PubMed:11809873, ECO:0000303|PubMed:16207746}; AltName: Full=AtRBG7 {ECO:0000303|PubMed:20009520}; AltName: Full=Glycine-rich protein 7 {ECO:0000303|PubMed:20009520}; Short=AtGRP7 {ECO:0000303|PubMed:20009520}; AltName: Full=Protein COLD, CIRCADIAN R…	A0A2C9U6V7_MANES RecName: Full=RRM domain-containing protein {ECO:0000259|PROSITE:PS50102};	FOG: RRM domain	GO:0009507,chloroplast; GO:0005737,cytoplasm; GO:0005829,cytosol; GO:0005615,extracellular space; GO:0005634,nucleus; GO:0005777,peroxisome; GO:0009506,plasmodesma; GO:0005773,vacuole; GO:0003690,double-stranded DNA binding; GO:0035198,miRNA binding; GO:0003730,mRNA 3'-UTR binding; GO:0003729,mRNA binding; GO:0003723,RNA binding; GO:0003697,single-stranded DNA binding; GO:0003727,single-stranded …	PF00076.25:RNA recognition motif. (a.k.a. RRM, RBD, or RNP domain)	--	--	--
LOC123212683	1274	259	1082	47	62	49	23.3236	5.8477	17.8332	0.8478	1.1638	1.0766	15.6681666666667	1.0294	-3.92796	4.68318106422487e-13	4.8442404642862e-11	NC_058140.1	13321072	13323613	-	LOC123212683	--	K00423 L-ascorbate oxidase [EC:1.10.3.3] | (RefSeq) L-ascorbate oxidase homolog (A)	ko00053: Ascorbate and aldarate metabolism; ko01100: Metabolic pathways	L-ascorbate oxidase homolog [Mangifera indica]	ASOL_BRANA RecName: Full=L-ascorbate oxidase homolog; EC=1.10.3.-; Flags: Precursor;	B9SR02_RICCO SubName: Full=Multicopper oxidase, putative {ECO:0000313|EMBL:EEF33963.1}; EC=1.10.3.3 {ECO:0000313|EMBL:EEF33963.1};	Multicopper oxidases	GO:0005576,extracellular region; GO:0005507,copper ion binding; GO:0016491,oxidoreductase activity; GO:0003674,molecular_function; GO:0005488,binding; GO:0043167,ion binding; GO:0043169,cation binding; GO:0046872,metal ion binding; GO:0046914,transition metal ion binding; GO:0003824,catalytic activity; GO:0005575,cellular_component; GO:0110165,cellular anatomical entity	PF00394.25:Multicopper oxidase	--	--	--
LOC123215354	746	981	863	154	152	152	34.8596	56.5342	36.3053	7.0901	7.2823	8.5244	42.5663666666667	7.63226666666667	-2.47953	4.75102823525716e-13	4.89871994365669e-11	NC_058137.1	6950345	6951384	+	LOC123215354	--	K06689 ubiquitin-conjugating enzyme E2 D [EC:2.3.2.23] | (RefSeq) ubiquitin-conjugating enzyme E2-17 kDa-like (A)	ko03083: Polycomb repressive complex; ko04120: Ubiquitin mediated proteolysis; ko04141: Protein processing in endoplasmic reticulum	ubiquitin-conjugating enzyme E2-17 kDa-like [Mangifera indica]	UBC4_SOLLC RecName: Full=Ubiquitin-conjugating enzyme E2-17 kDa; EC=2.3.2.23; AltName: Full=E2 ubiquitin-conjugating enzyme; AltName: Full=Ubiquitin carrier protein; AltName: Full=Ubiquitin-protein ligase;	A0A6P6T5L2_COFAR SubName: Full=ubiquitin-conjugating enzyme E2 28-like isoform X1 {ECO:0000313|RefSeq:XP_027073618.1, ECO:0000313|RefSeq:XP_027077426.1};	Ubiquitin-protein ligase	GO:0005634,nucleus; GO:0005524,ATP binding; GO:0061631,ubiquitin conjugating enzyme activity; GO:0000209,protein polyubiquitination; GO:0006511,ubiquitin-dependent protein catabolic process; GO:0000166,nucleotide binding; GO:0003674,molecular_function; GO:0005488,binding; GO:0017076,purine nucleotide binding; GO:0030554,adenyl nucleotide binding; GO:0032553,ribonucleotide binding; GO:0032555,puri…	PF00179.29:Ubiquitin-conjugating enzyme	--	--	--
LOC123218508	3163	4242	3935	643	614	726	109.651	181.36	122.81	21.962	21.8235	30.2053	137.94	24.6636	-2.48359	5.0655242520134e-13	5.20635873201364e-11	NC_058137.1	3204260	3206051	-	LOC123218508	--	K01512 acylphosphatase [EC:3.6.1.7] | (RefSeq) acylphosphatase (A)	ko00620: Pyruvate metabolism; ko01100: Metabolic pathways	acylphosphatase [Mangifera indica]	--	A0A7J6FJH8_CANSA RecName: Full=Acylphosphatase {ECO:0000256|PROSITE-ProRule:PRU00520}; EC=3.6.1.7 {ECO:0000256|PROSITE-ProRule:PRU00520};	Acylphosphatase	GO:0003998,acylphosphatase activity; GO:0003674,molecular_function; GO:0003824,catalytic activity; GO:0016462,pyrophosphatase activity; GO:0016787,hydrolase activity; GO:0016817,hydrolase activity, acting on acid anhydrides; GO:0016818,hydrolase activity, acting on acid anhydrides, in phosphorus-containing anhydrides	PF00708.21:Acylphosphatase	--	--	--
LOC123202684	329	472	337	23	20	42	5.0201	8.8822	4.6294	0.3458	0.3129	0.7691	6.17723333333333	0.475933333333333	-3.69813	5.440644725647e-13	5.57415642002558e-11	NC_058155.1	8632685	8638579	+	LOC123202684	--	K23280 rhamnogalacturonan I rhamnosyltransferase [EC:2.4.1.351] | (RefSeq) rhamnogalacturonan I rhamnosyltransferase 1-like (A)	--	O-fucosyltransferase 10-like [Mangifera indica]	OFT11_ARATH RecName: Full=O-fucosyltransferase 11 {ECO:0000305}; Short=O-FucT-11 {ECO:0000305}; EC=2.4.1.- {ECO:0000305}; AltName: Full=O-fucosyltransferase family protein {ECO:0000312|EMBL:ARJ31411.1};	A0A2H5NNQ8_CITUN RecName: Full=O-fucosyltransferase family protein {ECO:0000256|ARBA:ARBA00030350};	--	GO:0016021,integral component of membrane; GO:0016757,glycosyltransferase activity; GO:0006004,fucose metabolic process; GO:0003674,molecular_function; GO:0003824,catalytic activity; GO:0016740,transferase activity; GO:0005975,carbohydrate metabolic process; GO:0005996,monosaccharide metabolic process; GO:0008150,biological_process; GO:0008152,metabolic process; GO:0019318,hexose metabolic proces…	PF10250.12:GDP-fucose protein O-fucosyltransferase	--	--	--
novel.235	1582	1889	5060	415	275	147	20.4127	30.0597	58.7787	5.2758	3.6381	2.2764	36.4170333333333	3.7301	-3.28733	5.63844470124505e-13	5.75852929883802e-11	NC_058139.1	1289901	1293112	-	--	--	K04079 molecular chaperone HtpG | (RefSeq) heat shock protein 83-like (A)	ko04141: Protein processing in endoplasmic reticulum; ko04626: Plant-pathogen interaction	heat shock protein 83-like [Mangifera indica]	HSP82_TOBAC RecName: Full=Heat shock protein 82; Flags: Fragment;	A0A2C9UIA2_MANES RecName: Full=HATPase_c domain-containing protein {ECO:0000259|SMART:SM00387};	Molecular chaperone (HSP90 family)	GO:0005829,cytosol; GO:0048471,perinuclear region of cytoplasm; GO:0005886,plasma membrane; GO:0032991,protein-containing complex; GO:0005524,ATP binding; GO:0016887,ATP hydrolysis activity; GO:0051082,unfolded protein binding; GO:0034605,cellular response to heat; GO:0006457,protein folding; GO:0050821,protein stabilization; GO:0000166,nucleotide binding; GO:0003674,molecular_function; GO:000548…	PF00183.21:Hsp90 protein	--	--	--
LOC123216835	59	28	67	792	470	346	1.0318	0.6039	1.0549	13.6466	8.4274	7.2621	0.896866666666667	9.7787	3.44667725625744	5.80881610704339e-13	5.91381458115493e-11	NC_058141.1	15136264	15138275	+	LOC123216835	--	K14775 ribosome biogenesis protein UTP30 | (RefSeq) ribosomal L1 domain-containing protein 1-like (A)	--	ribosomal L1 domain-containing protein 1-like [Mangifera indica]	RL10A_CHLRE RecName: Full=60S ribosomal protein L10a;	A0A2H5PEN7_CITUN SubName: Full=Uncharacterized protein {ECO:0000313|EMBL:GAY50794.1};	Uncharacterized conserved protein	GO:0015934,large ribosomal subunit; GO:0003723,RNA binding; GO:0003735,structural constituent of ribosome; GO:0006412,translation; GO:0003674,molecular_function; GO:0003676,nucleic acid binding; GO:0005488,binding; GO:0097159,organic cyclic compound binding; GO:1901363,heterocyclic compound binding; GO:0005198,structural molecule activity; GO:0006518,peptide metabolic process; GO:0006807,nitrogen…	PF00687.24:Ribosomal protein L1p/L10e family	--	--	--
LOC123210378	84	151	223	4876	2970	1087	1.6765	3.7167	4.0069	95.8824	60.7753	26.037	3.13336666666667	60.8982333333333	4.28061486702457	5.92517703243592e-13	6.01330938263537e-11	NC_058137.1	22924296	22930365	+	LOC123210378	--	K16871 4-aminobutyrate---pyruvate transaminase [EC:2.6.1.96] | (RefSeq) gamma aminobutyrate transaminase 1, mitochondrial isoform X1 (A)	ko00250: Alanine, aspartate and glutamate metabolism; ko00650: Butanoate metabolism; ko01100: Metabolic pathways	gamma aminobutyrate transaminase 1, mitochondrial isoform X2 [Mangifera indica]	GATP1_SOLLC RecName: Full=Gamma aminobutyrate transaminase 1, mitochondrial; AltName: Full=Gamma-aminobutyrate transaminase isozyme 1; Short=LeGABA-TP1; Short=SlGABA-T1; EC=2.6.1.96; Flags: Precursor;	A0A5B6Z221_DAVIN SubName: Full=Uncharacterized protein {ECO:0000313|EMBL:MPA38051.1};	Alanine-glyoxylate aminotransferase AGT2	GO:0005739,mitochondrion; GO:0003867,4-aminobutyrate transaminase activity; GO:0034387,4-aminobutyrate:pyruvate transaminase activity; GO:0004015,adenosylmethionine-8-amino-7-oxononanoate transaminase activity; GO:0102351,gamma-aminobutyrate transaminase (glyoxylate dependent) activity; GO:0030170,pyridoxal phosphate binding; GO:0009102,biotin biosynthetic process; GO:0009448,gamma-aminobutyric a…	PF00202.24:Aminotransferase class-III	--	--	--
LOC123209704	337	119	198	1	8	8	9.8488	4.289	5.2095	0.0288	0.2397	0.2806	6.4491	0.183033333333333	-5.13892	6.07903535816337e-13	6.14491819132048e-11	NC_058138.1	13265915	13272998	-	LOC123209704	--	--	--	NDR1/HIN1-like protein 13 [Mangifera indica]	NHL13_ARATH RecName: Full=NDR1/HIN1-like protein 13 {ECO:0000303|PubMed:26206852};	A0A660KMR3_9ROSI RecName: Full=LEA_2 domain-containing protein {ECO:0000259|Pfam:PF03168};	--	GO:0016021,integral component of membrane; GO:0005886,plasma membrane; GO:0009506,plasmodesma; GO:0042742,defense response to bacterium; GO:0006950,response to stress; GO:0006952,defense response; GO:0008150,biological_process; GO:0009605,response to external stimulus; GO:0009607,response to biotic stimulus; GO:0009617,response to bacterium; GO:0043207,response to external biotic stimulus; GO:004…	PF03168.16:Late embryogenesis abundant protein	--	--	--
LOC123197615	1147	1109	1367	55	84	150	47.0935	56.155	50.5292	2.2249	3.5361	7.3913	51.2592333333333	4.3841	-3.54746	6.0929378155813e-13	6.14491819132048e-11	NC_058151.1	3427546	3428499	-	LOC123197615	--	K13993 HSP20 family protein | (RefSeq) heat shock 22 kDa protein, mitochondrial-like (A)	ko04141: Protein processing in endoplasmic reticulum	heat shock 22 kDa protein, mitochondrial-like [Mangifera indica]	HS22M_PEA RecName: Full=Heat shock 22 kDa protein, mitochondrial; Flags: Precursor;	A0A2K8BM65_MANIN SubName: Full=Heat-shock protein 23.2 {ECO:0000313|EMBL:AJA79010.1};	Molecular chaperone (small heat-shock protein Hsp26/Hsp42)	GO:0005739,mitochondrion; GO:0005575,cellular_component; GO:0005622,intracellular anatomical structure; GO:0005737,cytoplasm; GO:0043226,organelle; GO:0043227,membrane-bounded organelle; GO:0043229,intracellular organelle; GO:0043231,intracellular membrane-bounded organelle; GO:0110165,cellular anatomical entity	PF00011.24:Hsp20/alpha crystallin family	--	--	--
LOC123210502	57	94	79	1637	799	624	0.7649	1.5557	0.9544	21.6443	10.9935	10.05	1.09166666666667	14.2292666666667	3.7042570006032	6.12549874349959e-13	6.15851155604244e-11	NC_058139.1	22751549	22759272	-	LOC123210502	--	K14724 solute carrier family 9 (sodium/hydrogen exchanger), member 8 | (RefSeq) sodium/hydrogen exchanger 1-like (A)	--	sodium/hydrogen exchanger 2-like isoform X1 [Mangifera indica]	NHX1_ORYSJ RecName: Full=Sodium/hydrogen exchanger 1 {ECO:0000303|PubMed:10395929}; AltName: Full=Na(+)/H(+) exchanger 1 {ECO:0000303|PubMed:10395929}; Short=OsNHX1 {ECO:0000303|PubMed:10395929};	A0A067G625_CITSI RecName: Full=Sodium/hydrogen exchanger {ECO:0000256|RuleBase:RU003722};	Sodium/hydrogen exchanger protein	GO:0016021,integral component of membrane; GO:0005886,plasma membrane; GO:0005774,vacuolar membrane; GO:0015386,potassium:proton antiporter activity; GO:0015385,sodium:proton antiporter activity; GO:0071805,potassium ion transmembrane transport; GO:0051453,regulation of intracellular pH; GO:0098719,sodium ion import across plasma membrane; GO:0003674,molecular_function; GO:0005215,transporter act…	PF00999.24:Sodium/hydrogen exchanger family	--	--	--
novel.1168	4	11	10	156	195	158	0.1725	0.585	0.3882	6.6277	8.6212	8.1767	0.3819	7.80853333333333	4.35378476920552	6.15031680697394e-13	6.16426007178478e-11	NC_058150.1	11653721	11654536	.	--	--	--	--	--	--	--	--	--	--	--	--	--
LOC123229333	465	605	666	3753	4377	3727	6.9418	11.1387	8.9509	55.201	66.9946	66.7748	9.01046666666667	62.9901333333333	2.80545213242765	6.27982309918139e-13	6.27457371145143e-11	NC_058147.1	3241133	3245138	-	LOC123229333	--	K00058 D-3-phosphoglycerate dehydrogenase / 2-oxoglutarate reductase [EC:1.1.1.95 1.1.1.399] | (RefSeq) D-3-phosphoglycerate dehydrogenase 3, chloroplastic-like (A)	ko00260: Glycine, serine and threonine metabolism; ko00270: Cysteine and methionine metabolism; ko01100: Metabolic pathways; ko01110: Biosynthesis of secondary metabolites; ko01200: Carbon metabolism; ko01230: Biosynthesis of amino acids	D-3-phosphoglycerate dehydrogenase 3, chloroplastic-like [Mangifera indica]	SERA3_ARATH RecName: Full=D-3-phosphoglycerate dehydrogenase 3, chloroplastic; EC=1.1.1.95 {ECO:0000269|PubMed:24368794}; Flags: Precursor;	A0A2H5NI43_CITUN RecName: Full=D-3-phosphoglycerate dehydrogenase {ECO:0000256|RuleBase:RU363003}; EC=1.1.1.95 {ECO:0000256|RuleBase:RU363003};	D-3-phosphoglycerate dehydrogenase, D-isomer-specific 2-hydroxy acid dehydrogenase superfamily	GO:0009507,chloroplast; GO:0009570,chloroplast stroma; GO:0005739,mitochondrion; GO:0051287,NAD binding; GO:0003954,NADH dehydrogenase activity; GO:0004617,phosphoglycerate dehydrogenase activity; GO:0006564,L-serine biosynthetic process; GO:0009643,photosynthetic acclimation; GO:0000166,nucleotide binding; GO:0003674,molecular_function; GO:0005488,binding; GO:0036094,small molecule binding; GO:0…	PF02826.22:D-isomer specific 2-hydroxyacid dehydrogenase, NAD binding domain	--	--	--
LOC123224137	625	833	704	5999	5264	4676	12.4811	20.5152	12.6567	118.032	107.779	112.068	15.2176666666667	112.626	2.8877246869078	6.63279224296095e-13	6.60679333509502e-11	NC_058144.1	4665069	4669591	-	LOC123224137	--	--	--	switch-associated protein 70-like isoform X1 [Mangifera indica]	--	A0A2H5QU48_CITUN RecName: Full=PH domain-containing protein {ECO:0000259|PROSITE:PS50003};	--	--	PF00169.32:PH domain	--	--	--
LOC123204925	181	176	228	1152	942	943	3.9755	4.7675	4.5084	24.9297	21.2135	24.8578	4.41713333333333	23.667	2.42169455679706	7.15998444608294e-13	7.09506973914348e-11	NC_058156.1	10827371	10830704	-	LOC123204925	--	K17413 small subunit ribosomal protein S35 | (RefSeq) uncharacterized protein LOC123204925 (A)	--	uncharacterized protein LOC123204925 [Mangifera indica]	--	A0A067E7F8_CITSI RecName: Full=MRP-S28 domain-containing protein {ECO:0000259|Pfam:PF10213};	--	GO:0005763,mitochondrial small ribosomal subunit; GO:0003735,structural constituent of ribosome; GO:0032543,mitochondrial translation; GO:0003674,molecular_function; GO:0005198,structural molecule activity; GO:0006412,translation; GO:0006518,peptide metabolic process; GO:0006807,nitrogen compound metabolic process; GO:0008150,biological_process; GO:0008152,metabolic process; GO:0009058,biosynthet…	PF10213.12:Mitochondrial ribosomal subunit protein	--	--	--
LOC123202776	438	442	463	96	105	71	6.733	8.3794	6.4075	1.454	1.6549	1.3099	7.1733	1.47293333333333	-2.28394	7.16695917627979e-13	7.09506973914348e-11	NC_058155.1	4247980	4252999	-	LOC123202776	--	K05681 ATP-binding cassette, subfamily G (WHITE), member 2 | (RefSeq) ABC transporter G family member 25-like (A)	ko02010: ABC transporters	ABC transporter G family member 25-like [Mangifera indica]	AB25G_ARATH RecName: Full=ABC transporter G family member 25 {ECO:0000303|PubMed:18299247}; Short=ABC transporter ABCG.25 {ECO:0000303|PubMed:18299247}; Short=AtABCG25 {ECO:0000303|PubMed:18299247}; AltName: Full=White-brown complex homolog protein 26 {ECO:0000303|PubMed:11346655}; Short=AtWBC26 {ECO:0000303|PubMed:11346655};	A0A2H5NHW2_CITUN RecName: Full=ABC transporter domain-containing protein {ECO:0000259|PROSITE:PS50893};	Transporter, ABC superfamily (Breast cancer resistance protein)	GO:0016021,integral component of membrane; GO:0016020,membrane; GO:0005886,plasma membrane; GO:0140359,ABC-type transporter activity; GO:0005524,ATP binding; GO:0042626,ATPase-coupled transmembrane transporter activity; GO:0015562,efflux transmembrane transporter activity; GO:0080168,abscisic acid transport; GO:0009738,abscisic acid-activated signaling pathway; GO:0140352,export from cell; GO:001…	PF01061.27:ABC-2 type transporter	--	--	--
LOC123225547	636	527	846	6412	6146	2819	3.461	3.5368	4.1447	34.3784	34.291	18.4108	3.71416666666667	29.0267333333333	2.96627176006518	7.53629239767261e-13	7.43788270795377e-11	NC_058145.1	17405605	17413764	+	LOC123225547	--	--	--	uncharacterized protein LOC123225547 isoform X1 [Mangifera indica]	--	A0A5C7HLQ7_9ROSI SubName: Full=Uncharacterized protein {ECO:0000313|EMBL:TXG57685.1};	--	--	--	--	--	--
LOC123217250	223	198	181	36	27	19	5.9354	6.4994	4.3371	0.9441	0.7368	0.6069	5.59063333333333	0.7626	-2.87401	7.6544216427277e-13	7.53143749011436e-11	NC_058141.1	20063161	20068304	-	LOC123217250	--	K01800 maleylacetoacetate isomerase [EC:5.2.1.2] | (RefSeq) glutathione S-transferase 2-like isoform X1 (A)	ko00350: Tyrosine metabolism; ko01100: Metabolic pathways	glutathione S-transferase 2-like isoform X1 [Mangifera indica]	GSTZ_EUPES RecName: Full=Glutathione S-transferase zeta class; EC=2.5.1.18;	A0A067H1U9_CITSI RecName: Full=Glutathione transferase {ECO:0000256|ARBA:ARBA00012452}; EC=2.5.1.18 {ECO:0000256|ARBA:ARBA00012452};	Glutathione S-transferase	GO:0005737,cytoplasm; GO:0004364,glutathione transferase activity; GO:0009072,aromatic amino acid family metabolic process; GO:0006749,glutathione metabolic process; GO:0042221,response to chemical; GO:0003674,molecular_function; GO:0003824,catalytic activity; GO:0016740,transferase activity; GO:0016765,transferase activity, transferring alkyl or aryl (other than methyl) groups; GO:0006082,organi…	PF13417.9:Glutathione S-transferase, N-terminal domain	--	--	--
LOC123229945	462	417	1175	80	24	15	14.9003	16.5863	34.1167	2.5421	0.7936	0.5806	21.8677666666667	1.30543333333333	-4.06621	7.70014708268536e-13	7.55339959876914e-11	NC_058147.1	13541261	13542604	-	LOC123229945	--	--	--	uncharacterized protein LOC123229945 [Mangifera indica]	--	A0A5C7HB47_9ROSI RecName: Full=N-acetyltransferase domain-containing protein {ECO:0000259|PROSITE:PS51186};	--	GO:0008080,N-acetyltransferase activity; GO:0003674,molecular_function; GO:0003824,catalytic activity; GO:0016407,acetyltransferase activity; GO:0016410,N-acyltransferase activity; GO:0016740,transferase activity; GO:0016746,acyltransferase activity; GO:0016747,acyltransferase activity, transferring groups other than amino-acyl groups	PF00583.28:Acetyltransferase (GNAT) family	GNAT	TR	GNAT
LOC123203314	1889	497	2419	15	37	77	87.4575	28.3779	100.827	0.6842	1.7563	4.2785	72.2208	2.23966666666667	-5.01106	8.08153469997228e-13	7.90349604158198e-11	NC_058138.1	15656968	15657727	-	LOC123203314	--	--	--	dirigent protein 22-like [Mangifera indica]	DIR19_ARATH RecName: Full=Dirigent protein 19; Short=AtDIR19; Flags: Precursor;	A0A5C7IUU0_9ROSI RecName: Full=Dirigent protein {ECO:0000256|RuleBase:RU363099};	--	GO:0048046,apoplast; GO:0009699,phenylpropanoid biosynthetic process; GO:0006725,cellular aromatic compound metabolic process; GO:0008150,biological_process; GO:0008152,metabolic process; GO:0009058,biosynthetic process; GO:0009698,phenylpropanoid metabolic process; GO:0009987,cellular process; GO:0019438,aromatic compound biosynthetic process; GO:0019748,secondary metabolic process; GO:0044237,c…	PF03018.17:Dirigent-like protein	--	--	--
LOC123202964	12	9	11	256	153	108	0.1405	0.13	0.116	2.9534	1.8368	1.5177	0.128833333333333	2.10263333333333	4.02861946980548	8.48559114273356e-13	8.27357954530031e-11	NC_058155.1	7271284	7274288	-	LOC123202964	--	--	--	pentatricopeptide repeat-containing protein At3g26540 [Mangifera indica]	PP256_ARATH RecName: Full=Pentatricopeptide repeat-containing protein At3g26540;	A0A5C7HUS6_9ROSI SubName: Full=Uncharacterized protein {ECO:0000313|EMBL:TXG60847.1};	FOG: PPR repeat	GO:0043231,intracellular membrane-bounded organelle; GO:0003723,RNA binding; GO:0009451,RNA modification; GO:0010449,root meristem growth; GO:0003674,molecular_function; GO:0003676,nucleic acid binding; GO:0005488,binding; GO:0097159,organic cyclic compound binding; GO:1901363,heterocyclic compound binding; GO:0006139,nucleobase-containing compound metabolic process; GO:0006725,cellular aromatic …	PF01535.23:PPR repeat	--	--	--
LOC123196629	7	19	20	299	279	170	0.1007	0.3371	0.259	4.2378	4.115	2.935	0.232266666666667	3.7626	4.01787589708877	9.13727599345877e-13	8.88214783544865e-11	NC_058150.1	5902762	5905207	+	LOC123196629	--	K17964 leucine-rich PPR motif-containing protein, mitochondrial | (RefSeq) pentatricopeptide repeat-containing protein At5g57250, mitochondrial (A)	--	pentatricopeptide repeat-containing protein At1g03540 [Mangifera indica]	PPR8_ARATH RecName: Full=Pentatricopeptide repeat-containing protein At1g03540;	A0A5C7HFQ4_9ROSI SubName: Full=Uncharacterized protein {ECO:0000313|EMBL:TXG55232.1};	FOG: PPR repeat	GO:0043231,intracellular membrane-bounded organelle; GO:0003723,RNA binding; GO:0009451,RNA modification; GO:0003674,molecular_function; GO:0003676,nucleic acid binding; GO:0005488,binding; GO:0097159,organic cyclic compound binding; GO:1901363,heterocyclic compound binding; GO:0006139,nucleobase-containing compound metabolic process; GO:0006725,cellular aromatic compound metabolic process; GO:00…	PF01535.23:PPR repeat	--	--	--
LOC123197457	24	29	33	317	245	187	0.4046	0.603	0.5009	5.2658	4.2351	3.7838	0.502833333333333	4.42823333333333	3.13857904712698	9.33992192392637e-13	9.05187087840468e-11	NC_058151.1	6586846	6588932	-	LOC123197457	--	K11131 H/ACA ribonucleoprotein complex subunit 4 [EC:5.4.99.-] | (RefSeq) H/ACA ribonucleoprotein complex subunit 4-like (A)	ko03008: Ribosome biogenesis in eukaryotes	H/ACA ribonucleoprotein complex subunit 4-like [Mangifera indica]	CBF5_ARATH RecName: Full=H/ACA ribonucleoprotein complex subunit 4; EC=5.4.99.-; AltName: Full=CBF5 homolog; AltName: Full=Dyskerin; AltName: Full=Nopp-140-associated protein of 57 kDa homolog; Short=AtNAP57; AltName: Full=Nucleolar protein NAP57 homolog;	A0A5C7IM44_9ROSI SubName: Full=Uncharacterized protein {ECO:0000313|EMBL:TXG70275.1};	Pseudouridine synthase	GO:0031429,box H/ACA snoRNP complex; GO:0005829,cytosol; GO:0005730,nucleolus; GO:0009506,plasmodesma; GO:0009982,pseudouridine synthase activity; GO:0003723,RNA binding; GO:0000495,box H/ACA RNA 3'-end processing; GO:1990481,mRNA pseudouridine synthesis; GO:0031118,rRNA pseudouridine synthesis; GO:0031120,snRNA pseudouridine synthesis; GO:0003674,molecular_function; GO:0003824,catalytic activity…	PF08068.15:DKCLD (NUC011) domain	--	--	--
LOC123222355	0	2	2	853	352	56	0	0.0555	0.0405	18.9078	8.1195	1.512	0.032	9.5131	8.21569982825607	1.08535087420619e-12	1.04872840608552e-10	NC_058144.1	8697819	8699382	-	LOC123222355	--	--	--	F-box protein CPR1-like [Mangifera indica]	CPR1_ARATH RecName: Full=F-box protein CPR1; AltName: Full=Protein CONSTITUTIVE EXPRESSER OF PR GENES 1; AltName: Full=Protein CONSTITUTIVE EXPRESSER OF PR GENES 30 {ECO:0000303|PubMed:19682297};	A0A2H5N538_CITUN RecName: Full=F-box domain-containing protein {ECO:0000259|PROSITE:PS50181};	--	GO:0005737,cytoplasm; GO:0005634,nucleus; GO:0031348,negative regulation of defense response; GO:0042177,negative regulation of protein catabolic process; GO:0009626,plant-type hypersensitive response; GO:0016567,protein ubiquitination; GO:0006950,response to stress; GO:0006952,defense response; GO:0008150,biological_process; GO:0031347,regulation of defense response; GO:0048519,negative regulati…	PF00646.36:F-box domain	--	--	--
LOC123226682	1730	1133	2261	203	235	313	32.4483	26.208	38.1788	3.7514	4.5192	7.0457	32.2783666666667	5.10543333333333	-2.66046	1.09388917985288e-12	1.05382344780275e-10	NC_058146.1	6892879	6896586	+	LOC123226682	--	--	--	protein WVD2-like 4 [Mangifera indica]	WDL4_ARATH RecName: Full=Protein WVD2-like 4 {ECO:0000305};	A0A067G5L2_CITSI RecName: Full=TPX2 domain-containing protein {ECO:0000259|Pfam:PF06886};	--	GO:0005783,endoplasmic reticulum; GO:0005874,microtubule; GO:0008017,microtubule binding; GO:0072657,protein localization to membrane; GO:0003674,molecular_function; GO:0005488,binding; GO:0005515,protein binding; GO:0008092,cytoskeletal protein binding; GO:0015631,tubulin binding; GO:0008104,protein localization; GO:0008150,biological_process; GO:0009987,cellular process; GO:0033036,macromolecul…	PF06886.14:Targeting protein for Xklp2 (TPX2) domain	--	--	--
LOC123198562	646	348	1156	73	67	93	28.0625	18.6437	45.2092	3.1244	2.9841	4.8485	30.6384666666667	3.65233333333333	-3.06845	1.11032879900623e-12	1.06647742054548e-10	NC_058152.1	2046438	2047643	-	LOC123198562	--	--	--	CASP-like protein ARALYDRAFT_485429 [Mangifera indica]	CSPLN_ARALL RecName: Full=CASP-like protein ARALYDRAFT_485429;	V4SEL8_CITCL RecName: Full=CASP-like protein {ECO:0000256|RuleBase:RU361233};	--	GO:0016021,integral component of membrane; GO:0005886,plasma membrane; GO:0005575,cellular_component; GO:0016020,membrane; GO:0031224,intrinsic component of membrane; GO:0110165,cellular anatomical entity; GO:0071944,cell periphery	PF04535.15:Casparian strip membrane protein domain	--	--	--
LOC123206967	970	473	981	80	32	93	24.7686	14.8953	22.5514	2.0127	0.8378	2.85	20.7384333333333	1.90016666666667	-3.44811	1.15059015872306e-12	1.10186932321867e-10	NC_058138.1	21130430	21134398	+	LOC123206967	--	K13066 caffeic acid 3-O-methyltransferase / acetylserotonin O-methyltransferase [EC:2.1.1.68 2.1.1.4] | (RefSeq) caffeic acid 3-O-methyltransferase-like isoform X1 (A)	ko00380: Tryptophan metabolism; ko00940: Phenylpropanoid biosynthesis; ko01100: Metabolic pathways; ko01110: Biosynthesis of secondary metabolites	caffeic acid 3-O-methyltransferase-like isoform X1 [Mangifera indica]	COMT1_POPKI RecName: Full=Caffeic acid 3-O-methyltransferase 1; Short=CAOMT-1; Short=COMT-1; EC=2.1.1.68; AltName: Full=S-adenosysl-L-methionine:caffeic acid 3-O-methyltransferase 1;	A0A6A6NEY1_HEVBR SubName: Full=Uncharacterized protein {ECO:0000313|EMBL:KAF2323703.1};	Hydroxyindole-O-methyltransferase and related SAM-dependent methyltransferases	GO:0047763,caffeate O-methyltransferase activity; GO:0046983,protein dimerization activity; GO:0009809,lignin biosynthetic process; GO:0032259,methylation; GO:0003674,molecular_function; GO:0003824,catalytic activity; GO:0008168,methyltransferase activity; GO:0008171,O-methyltransferase activity; GO:0016740,transferase activity; GO:0016741,transferase activity, transferring one-carbon groups; GO:…	PF00891.21:O-methyltransferase domain	--	--	--
LOC123203048	288	93	429	18	13	19	7.9982	3.1853	10.7259	0.4925	0.3702	0.6333	7.30313333333333	0.498666666666667	-3.87237	1.16142391026984e-12	1.10895366438279e-10	NC_058155.1	7292608	7295575	-	LOC123203048	--	K22013 magnesium dechelatase [EC:4.99.1.10] | (RefSeq) magnesium dechelatase SGRL, chloroplastic-like (A)	ko00860: Porphyrin metabolism; ko01110: Biosynthesis of secondary metabolites	magnesium dechelatase SGRL, chloroplastic-like [Mangifera indica]	SGRL_ARATH RecName: Full=Magnesium dechelatase SGRL, chloroplastic {ECO:0000305}; EC=4.99.1.10 {ECO:0000269|PubMed:27604697}; AltName: Full=Protein STAY-GREEN LIKE {ECO:0000303|PubMed:25261252}; Flags: Precursor;	V4T342_CITCL RecName: Full=Staygreen domain-containing protein {ECO:0000259|Pfam:PF12638};	--	GO:0009534,chloroplast thylakoid; GO:0016829,lyase activity; GO:0015996,chlorophyll catabolic process; GO:0009658,chloroplast organization; GO:0003674,molecular_function; GO:0003824,catalytic activity; GO:0006725,cellular aromatic compound metabolic process; GO:0006778,porphyrin-containing compound metabolic process; GO:0006787,porphyrin-containing compound catabolic process; GO:0006807,nitrogen …	PF12638.10:Staygreen protein	--	--	--
LOC123198737	60	57	58	3819	1849	401	0.9842	1.1531	0.8566	61.7234	31.098	7.8946	0.997966666666667	33.572	5.07212304714641	1.23168230512397e-12	1.17256882104029e-10	NC_058152.1	13681007	13684953	-	LOC123198737	--	--	--	pentatricopeptide repeat-containing protein At2g35130 isoform X2 [Mangifera indica]	PP186_ARATH RecName: Full=Pentatricopeptide repeat-containing protein At2g35130;	A0A2H5P9T1_CITUN SubName: Full=Uncharacterized protein {ECO:0000313|EMBL:GAY49118.1};	FOG: PPR repeat	--	PF13041.9:PPR repeat family	--	--	--
LOC123194316	191	342	252	2765	3174	2247	5.1342	11.3377	6.0984	73.229	87.4763	72.4897	7.52343333333333	77.7316666666667	3.36903935584801	1.26318953407568e-12	1.19902693627131e-10	NC_058149.1	12359830	12362546	-	LOC123194316	--	--	--	SPX domain-containing protein 1-like [Mangifera indica]	SPX2_ARATH RecName: Full=SPX domain-containing protein 2 {ECO:0000303|PubMed:18315545}; AltName: Full=Protein SPX DOMAIN GENE 2 {ECO:0000303|PubMed:18315545}; Short=AtSPX2 {ECO:0000303|PubMed:18315545};	A0A067GY70_CITSI RecName: Full=SPX domain-containing protein {ECO:0000259|PROSITE:PS51382};	Protein involved in vacuolar polyphosphate accumulation, contains SPX domain	GO:0005634,nucleus; GO:0071456,cellular response to hypoxia; GO:0016036,cellular response to phosphate starvation; GO:0001666,response to hypoxia; GO:0006950,response to stress; GO:0008150,biological_process; GO:0009628,response to abiotic stimulus; GO:0009987,cellular process; GO:0033554,cellular response to stress; GO:0036293,response to decreased oxygen levels; GO:0036294,cellular response to …	PF03105.22:SPX domain	--	--	--
LOC123216130	799	1026	2560	35	42	113	20.3726	32.2631	58.7645	0.8793	1.098	3.4579	37.1334	1.81173333333333	-4.35727	1.31809131985472e-12	1.24387503256736e-10	NC_058141.1	17586399	17588549	+	LOC123216130	--	K18819 inositol 3-alpha-galactosyltransferase [EC:2.4.1.123] | (RefSeq) galactinol synthase 1-like (A)	ko00052: Galactose metabolism; ko01100: Metabolic pathways	galactinol synthase 1-like [Mangifera indica]	GOLS1_ARATH RecName: Full=Galactinol synthase 1; Short=AtGolS1; Short=GolS-1; EC=2.4.1.123;	A0A1R3H1C8_COCAP RecName: Full=Hexosyltransferase {ECO:0000256|RuleBase:RU362027}; EC=2.4.1.- {ECO:0000256|RuleBase:RU362027};	Glycosyl transferase, family 8 - glycogenin	GO:0005737,cytoplasm; GO:0016757,glycosyltransferase activity; GO:0047216,inositol 3-alpha-galactosyltransferase activity; GO:0046872,metal ion binding; GO:0006012,galactose metabolic process; GO:0009737,response to abscisic acid; GO:0009409,response to cold; GO:0009408,response to heat; GO:0006979,response to oxidative stress; GO:0009651,response to salt stress; GO:0009414,response to water depr…	PF01501.23:Glycosyl transferase family 8	--	--	--
LOC123206915	105	66	90	782	737	1134	1.7797	1.3796	1.3733	13.0589	12.8075	23.0674	1.51086666666667	16.3112666666667	3.43242056621641	1.31814600792624e-12	1.24387503256736e-10	NW_025401145.1	81740	85434	+	LOC123206915	--	K13424 WRKY transcription factor 33 | (RefSeq) probable WRKY transcription factor 25 (A)	ko04016: MAPK signaling pathway - plant; ko04626: Plant-pathogen interaction	probable WRKY transcription factor 3 [Mangifera indica]	WRKY4_ARATH RecName: Full=Probable WRKY transcription factor 4; AltName: Full=WRKY DNA-binding protein 4;	A0A067FZC2_CITSI SubName: Full=Uncharacterized protein {ECO:0000313|EMBL:KDO72709.1};	--	GO:0005634,nucleus; GO:0003677,DNA binding; GO:0003700,DNA-binding transcription factor activity; GO:0046872,metal ion binding; GO:0043565,sequence-specific DNA binding; GO:0000976,transcription cis-regulatory region binding; GO:0006952,defense response; GO:1900425,negative regulation of defense response to bacterium; GO:1900150,regulation of defense response to fungus; GO:0009723,response to eth…	PF03106.18:WRKY DNA -binding domain	WRKY	TF	WRKY
LOC123228010	1120	727	1438	6785	10589	6950	24.7389	19.8041	28.5955	147.66	239.807	184.239	24.3795	190.568633333333	2.96657023513563	1.41266910407536e-12	1.32918571416397e-10	NC_058146.1	8207499	8211787	-	LOC123228010	--	K10256 omega-6 fatty acid desaturase / acyl-lipid omega-6 desaturase (Delta-12 desaturase) [EC:1.14.19.6 1.14.19.22] | (RefSeq) delta(12)-fatty-acid desaturase FAD2-like (A)	ko01040: Biosynthesis of unsaturated fatty acids; ko01100: Metabolic pathways; ko01212: Fatty acid metabolism	delta(12)-fatty-acid desaturase FAD2-like [Mangifera indica]	FAD2_VERFO RecName: Full=Delta(12)-fatty-acid desaturase FAD2 {ECO:0000303|PubMed:12481086}; EC=1.14.19.6 {ECO:0000269|PubMed:12481086};	A0A075EJZ4_RHUCH SubName: Full=Omega-6 fatty acid desaturase {ECO:0000313|EMBL:AIE48273.1};	--	GO:0005789,endoplasmic reticulum membrane; GO:0016021,integral component of membrane; GO:0102985,delta12-fatty-acid desaturase activity; GO:0102987,palmitoleic acid delta 12 desaturase activity; GO:0006636,unsaturated fatty acid biosynthetic process; GO:0003674,molecular_function; GO:0003824,catalytic activity; GO:0016491,oxidoreductase activity; GO:0016705,oxidoreductase activity, acting on pair…	PF00487.27:Fatty acid desaturase	--	--	--
LOC123195566	43	20	71	496	405	417	0.6488	0.3722	0.9645	7.3736	6.2654	7.5513	0.661833333333333	7.06343333333333	3.41582974672084	1.44188782438402e-12	1.35273388826585e-10	NC_058150.1	5657680	5660011	-	LOC123195566	--	K09286 EREBP-like factor | (RefSeq) ethylene-responsive transcription factor RAP2-13-like (A)	--	ethylene-responsive transcription factor ERF054-like [Mangifera indica]	ERF53_ARATH RecName: Full=Ethylene-responsive transcription factor ERF053 {ECO:0000305}; Short=AtERF53 {ECO:0000303|PubMed:22095047};	V4TJF8_CITCL RecName: Full=AP2/ERF domain-containing protein {ECO:0000259|PROSITE:PS51032};	--	GO:0005737,cytoplasm; GO:0005634,nucleus; GO:0003700,DNA-binding transcription factor activity; GO:0043565,sequence-specific DNA binding; GO:0000976,transcription cis-regulatory region binding; GO:0009873,ethylene-activated signaling pathway; GO:1900036,positive regulation of cellular response to heat; GO:0045893,positive regulation of DNA-templated transcription; GO:2000070,regulation of respons…	PF00847.23:AP2 domain	AP2/ERF-ERF	TF	AP2/ERF->AP2/ERF-ERF
LOC123196445	149	286	234	9328	5300	1657	1.7973	4.2547	2.5412	110.861	65.5484	23.9883	2.8644	66.7993	4.54352810719219	1.46987295012706e-12	1.37499158607104e-10	NC_058150.1	1251107	1260457	+	LOC123196445	--	K12486 stromal membrane-associated protein | (RefSeq) probable ADP-ribosylation factor GTPase-activating protein AGD11 (A)	ko04144: Endocytosis	synaptotagmin-5 isoform X1 [Mangifera indica]	SYT5_ARATH RecName: Full=Synaptotagmin-5; AltName: Full=NTMC2T2.1; AltName: Full=Synaptotagmin E;	A0A067EQJ2_CITSI SubName: Full=Uncharacterized protein {ECO:0000313|EMBL:KDO57459.1};	Ca2+-dependent lipid-binding protein CLB1/vesicle protein vp115/Granuphilin A, contains C2 domain	GO:0012505,endomembrane system; GO:0005783,endoplasmic reticulum; GO:0016021,integral component of membrane; GO:0033011,perinuclear theca; GO:0009506,plasmodesma; GO:0008289,lipid binding; GO:0046872,metal ion binding; GO:0006869,lipid transport; GO:0003674,molecular_function; GO:0005488,binding; GO:0043167,ion binding; GO:0043169,cation binding; GO:0006810,transport; GO:0008150,biological_proces…	PF00168.33:C2 domain	--	--	--
LOC123215049	658	512	610	60	63	101	17.1503	16.4579	14.3137	1.5408	1.6836	3.1594	15.9739666666667	2.12793333333333	-2.9082	1.53572804607359e-12	1.4303280782094e-10	NC_058140.1	19176516	19181856	-	LOC123215049	--	K18835 WRKY transcription factor 2 | (RefSeq) probable WRKY transcription factor 2 isoform X1 (A)	ko04626: Plant-pathogen interaction	probable WRKY transcription factor 57 isoform X1 [Mangifera indica]	WRK57_ARATH RecName: Full=Probable WRKY transcription factor 57; AltName: Full=WRKY DNA-binding protein 57;	A0A5C7HJR3_9ROSI RecName: Full=WRKY domain-containing protein {ECO:0000259|PROSITE:PS50811};	--	GO:0005634,nucleus; GO:0003700,DNA-binding transcription factor activity; GO:0000976,transcription cis-regulatory region binding; GO:0006970,response to osmotic stress; GO:0009651,response to salt stress; GO:0009414,response to water deprivation; GO:0003674,molecular_function; GO:0140110,transcription regulator activity; GO:0001067,transcription regulatory region nucleic acid binding; GO:0003676,…	PF03106.18:WRKY DNA -binding domain	WRKY	TF	WRKY
LOC123197904	73	54	74	1420	672	417	0.6509	0.5938	0.5941	12.4755	6.1438	4.4626	0.612933333333333	7.69396666666667	3.64992550877135	1.53789186979414e-12	1.4303280782094e-10	NC_058151.1	5326629	5342109	+	LOC123197904	--	K14794 ribosomal RNA-processing protein 12 | (RefSeq) RRP12-like protein (A)	--	RRP12-like protein [Mangifera indica]	--	A0A2H5QMZ7_CITUN RecName: Full=NUC173 domain-containing protein {ECO:0000259|Pfam:PF08161};	Uncharacterized conserved protein	GO:0005634,nucleus; GO:0005575,cellular_component; GO:0005622,intracellular anatomical structure; GO:0043226,organelle; GO:0043227,membrane-bounded organelle; GO:0043229,intracellular organelle; GO:0043231,intracellular membrane-bounded organelle; GO:0110165,cellular anatomical entity	PF08161.15:NUC173 domain	--	--	--
LOC123214580	11	16	24	3093	774	157	0.51	0.9148	1.0017	141.275	36.7893	8.7352	0.808833333333333	62.2665333333333	6.26647069543414	1.550399668976e-12	1.43781748611674e-10	NC_058140.1	21038916	21039674	+	LOC123214580	--	--	--	uncharacterized protein LOC123214580 [Mangifera indica]	--	A0A067GUR3_CITSI SubName: Full=Uncharacterized protein {ECO:0000313|EMBL:KDO83463.1};	--	GO:0016021,integral component of membrane; GO:0005575,cellular_component; GO:0016020,membrane; GO:0031224,intrinsic component of membrane; GO:0110165,cellular anatomical entity	--	--	--	--
LOC123196376	229	236	321	1403	1421	1174	3.9287	4.9933	4.9579	23.7148	24.9949	24.1722	4.62663333333333	24.2939666666667	2.39256339625142	1.57225810399722e-12	1.45391076763043e-10	NC_058150.1	3206870	3209884	-	LOC123196376	--	K07442 tRNA (adenine57-N1/adenine58-N1)-methyltransferase catalytic subunit [EC:2.1.1.219 2.1.1.220] | (RefSeq) tRNA (adenine(58)-N(1))-methyltransferase catalytic subunit TRMT61A (A)	--	tRNA (adenine(58)-N(1))-methyltransferase catalytic subunit TRMT61A [Mangifera indica]	--	A0A5C7HCQ8_9ROSI RecName: Full=tRNA (adenine(58)-N(1))-methyltransferase {ECO:0000256|ARBA:ARBA00012796, ECO:0000256|PIRNR:PIRNR017269}; EC=2.1.1.220 {ECO:0000256|ARBA:ARBA00012796, ECO:0000256|PIRNR:PIRNR017269};	tRNA(1-methyladenosine) methyltransferase, subunit GCD14	GO:0031515,tRNA (m1A) methyltransferase complex; GO:0016429,tRNA (adenine-N1-)-methyltransferase activity; GO:0003674,molecular_function; GO:0003824,catalytic activity; GO:0008168,methyltransferase activity; GO:0008173,RNA methyltransferase activity; GO:0008175,tRNA methyltransferase activity; GO:0008757,S-adenosylmethionine-dependent methyltransferase activity; GO:0016426,tRNA (adenine) methyltr…	PF08704.13:tRNA methyltransferase complex GCD14 subunit	--	--	--
LOC123198193	561	472	500	68	12	33	17.346	17.9985	13.9182	2.0715	0.3804	1.2246	16.4209	1.2255	-3.74409	1.59130665814506e-12	1.4673211365233e-10	NC_058151.1	12661501	12665102	-	LOC123198193	--	K15030 translation initiation factor 3 subunit M | (RefSeq) eukaryotic translation initiation factor 3 subunit M-like (A)	--	eukaryotic translation initiation factor 3 subunit M-like [Mangifera indica]	--	A0A5N6QXY8_9ROSI RecName: Full=Eukaryotic translation initiation factor 3 subunit M {ECO:0000256|HAMAP-Rule:MF_03012}; Short=eIF3m {ECO:0000256|HAMAP-Rule:MF_03012};	Uncharacterized conserved protein, contains PCI domain	GO:0016282,eukaryotic 43S preinitiation complex; GO:0033290,eukaryotic 48S preinitiation complex; GO:0071541,eukaryotic translation initiation factor 3 complex, eIF3m; GO:0003743,translation initiation factor activity; GO:0001732,formation of cytoplasmic translation initiation complex; GO:0003674,molecular_function; GO:0003676,nucleic acid binding; GO:0005488,binding; GO:0008135,translation facto…	PF18005.4:eIF3 subunit M, C-terminal helix	--	--	--
LOC123201384	1697	1152	1670	484	415	327	20.8346	17.4427	18.4584	5.8546	5.2239	4.8182	18.9119	5.2989	-1.83553	1.60475477209165e-12	1.47550571964997e-10	NC_058154.1	13134981	13140522	+	LOC123201384	--	--	--	chloride channel protein CLC-f-like [Mangifera indica]	CLCF_ARATH RecName: Full=Chloride channel protein CLC-f; Short=AtCLC-f; AltName: Full=CBS domain-containing protein CBSCLC1;	V4WH44_CITCL RecName: Full=Chloride channel protein {ECO:0000256|RuleBase:RU361221};	Cl- channel CLC-3 and related proteins (CLC superfamily)	GO:0034707,chloride channel complex; GO:0009507,chloroplast; GO:0005794,Golgi apparatus; GO:0005247,voltage-gated chloride channel activity; GO:0034765,regulation of ion transmembrane transport; GO:0003674,molecular_function; GO:0005215,transporter activity; GO:0005216,ion channel activity; GO:0005244,voltage-gated ion channel activity; GO:0005253,anion channel activity; GO:0005254,chloride chann…	PF00654.23:Voltage gated chloride channel	--	--	--
LOC123205985	439	386	559	2483	1901	1793	7.0118	7.6034	8.0381	39.0742	31.1308	34.3699	7.5511	34.8583	2.20674348434904	1.68446795720338e-12	1.54439870405752e-10	NC_058138.1	19433084	19436572	+	LOC123205985	--	K08832 serine/threonine-protein kinase SRPK3 [EC:2.7.11.1] | (RefSeq) serine/threonine-protein kinase SRPK-like (A)	--	serine/threonine-protein kinase SRPK-like [Mangifera indica]	AFC3_ARATH RecName: Full=Serine/threonine-protein kinase AFC3; EC=2.7.12.1;	V4SKR0_CITCL RecName: Full=Protein kinase domain-containing protein {ECO:0000259|PROSITE:PS50011};	Serine/threonine protein kinase	GO:0005634,nucleus; GO:0005524,ATP binding; GO:0106310,protein serine kinase activity; GO:0004674,protein serine/threonine kinase activity; GO:0004712,protein serine/threonine/tyrosine kinase activity; GO:0004713,protein tyrosine kinase activity; GO:0046777,protein autophosphorylation; GO:0006468,protein phosphorylation; GO:0000166,nucleotide binding; GO:0003674,molecular_function; GO:0005488,bin…	PF00069.28:Protein kinase domain	--	--	--
LOC123206611	8476	3564	9968	370	652	814	277.435	143.869	293.734	11.9322	21.8807	31.9763	238.345833333333	21.9297333333333	-3.4421	1.75877902604414e-12	1.60796247896664e-10	NW_025401135.1	100451	101525	-	LOC123206611	--	--	--	NDR1/HIN1-like protein 13 [Mangifera indica]	NHL13_ARATH RecName: Full=NDR1/HIN1-like protein 13 {ECO:0000303|PubMed:26206852};	A0A6A6LJ05_HEVBR RecName: Full=LEA_2 domain-containing protein {ECO:0000259|Pfam:PF03168};	--	GO:0016021,integral component of membrane; GO:0005886,plasma membrane; GO:0009506,plasmodesma; GO:0042742,defense response to bacterium; GO:0006950,response to stress; GO:0006952,defense response; GO:0008150,biological_process; GO:0009605,response to external stimulus; GO:0009607,response to biotic stimulus; GO:0009617,response to bacterium; GO:0043207,response to external biotic stimulus; GO:004…	PF03168.16:Late embryogenesis abundant protein	--	--	--
novel.1177	2041	1504	1659	506	360	265	22.9225	20.8317	16.7741	5.5991	4.1454	3.5719	20.1761	4.4388	-2.18441	1.80398637072499e-12	1.64463424131095e-10	NC_058150.1	13683440	13689351	+	--	--	K14297 nuclear pore complex protein Nup98-Nup96 | (RefSeq) nuclear pore complex protein NUP98A-like isoform X1 (A)	ko03013: Nucleocytoplasmic transport	nuclear pore complex protein NUP98A-like isoform X2 [Mangifera indica]	NU98A_ARATH RecName: Full=Nuclear pore complex protein NUP98A {ECO:0000303|PubMed:21189294}; AltName: Full=Nucleoporin 98A {ECO:0000303|PubMed:21189294}; AltName: Full=Nucleoporin autopeptidase {ECO:0000312|EMBL:AEE28574.1};	A0A061G9T0_THECC SubName: Full=Nucleoporin autopeptidase, putative {ECO:0000313|EMBL:EOY23794.1};	Nuclear pore complex, Nup98 component (sc Nup145/Nup100/Nup116)	GO:0005737,cytoplasm; GO:0005635,nuclear envelope; GO:0031965,nuclear membrane; GO:0044614,nuclear pore cytoplasmic filaments; GO:0005634,nucleus; GO:0017056,structural constituent of nuclear pore; GO:0006406,mRNA export from nucleus; GO:0048573,photoperiodism, flowering; GO:0000973,post-transcriptional tethering of RNA polymerase II gene DNA at nuclear periphery; GO:0006606,protein import into n…	--	--	--	--
LOC123197412	1155	758	919	120	104	168	23.1307	18.7213	16.5691	2.3678	2.1354	4.0379	19.4737	2.84703333333333	-2.774	2.04744943045953e-12	1.86133339349916e-10	NC_058151.1	5293793	5295549	+	LOC123197412	--	--	--	uncharacterized protein LOC123197412 [Mangifera indica]	--	A0A2H5Q611_CITUN SubName: Full=Uncharacterized protein {ECO:0000313|EMBL:GAY59993.1};	--	--	--	--	--	--
LOC123198884	514	451	517	88	38	78	14.4341	15.6194	13.0705	2.4348	1.0941	2.6288	14.3746666666667	2.05256666666667	-2.80803	2.0876570432734e-12	1.89237112801047e-10	NC_058152.1	2362833	2365031	-	LOC123198884	--	K04708 3-dehydrosphinganine reductase [EC:1.1.1.102] | (RefSeq) 3-dehydrosphinganine reductase TSC10A (A)	ko00600: Sphingolipid metabolism; ko01100: Metabolic pathways	NADP-dependent 3-hydroxy acid dehydrogenase YdfG-like [Mangifera indica]	ADRC3_ARATH RecName: Full=NADPH-dependent aldehyde reductase-like protein, chloroplastic {ECO:0000250|UniProtKB:Q9SQR2}; EC=1.1.1.- {ECO:0000250|UniProtKB:Q9SQR2}; Flags: Precursor;	A0A6J0ZIL2_9ROSI SubName: Full=very-long-chain 3-oxoacyl-CoA reductase {ECO:0000313|RefSeq:XP_021274711.1};	17 beta-hydroxysteroid dehydrogenase type 3, HSD17B3	GO:0009507,chloroplast; GO:0016491,oxidoreductase activity; GO:0003674,molecular_function; GO:0003824,catalytic activity; GO:0005575,cellular_component; GO:0005622,intracellular anatomical structure; GO:0005737,cytoplasm; GO:0009536,plastid; GO:0043226,organelle; GO:0043227,membrane-bounded organelle; GO:0043229,intracellular organelle; GO:0043231,intracellular membrane-bounded organelle; GO:0110…	PF00106.28:short chain dehydrogenase	--	--	--
LOC123208769	5403	1938	5118	424	540	531	97.8959	43.3054	83.4844	7.5691	10.0315	11.5467	74.8952333333333	9.71576666666667	-2.94647	2.09331792117168e-12	1.89237112801047e-10	NC_058138.1	13596782	13600096	+	LOC123208769	--	K01114 phospholipase C [EC:3.1.4.3] | (RefSeq) non-specific phospholipase C2 (A)	ko00562: Inositol phosphate metabolism; ko00564: Glycerophospholipid metabolism; ko00565: Ether lipid metabolism; ko01100: Metabolic pathways; ko01110: Biosynthesis of secondary metabolites	non-specific phospholipase C2 [Mangifera indica]	NPC2_ARATH RecName: Full=Non-specific phospholipase C2; EC=3.1.-.-; Flags: Precursor;	A0A835MGN6_9ROSI SubName: Full=Uncharacterized protein {ECO:0000313|EMBL:KAF9665782.1};	--	GO:0009507,chloroplast; GO:0005576,extracellular region; GO:0005794,Golgi apparatus; GO:0004629,phospholipase C activity; GO:0042742,defense response to bacterium; GO:0048229,gametophyte development; GO:0009395,phospholipid catabolic process; GO:0048364,root development; GO:0003674,molecular_function; GO:0003824,catalytic activity; GO:0004620,phospholipase activity; GO:0008081,phosphoric diester …	PF04185.17:Phosphoesterase family	--	--	--
LOC123211033	158	182	193	37	23	17	0.4963	0.705	0.5458	0.1145	0.0741	0.0641	0.582366666666667	0.0842333333333333	-2.78946	2.10033273555684e-12	1.89340889314598e-10	NC_058139.1	9165239	9179238	+	LOC123211033	--	K06611 stachyose synthetase [EC:2.4.1.67] | (RefSeq) stachyose synthase (A)	ko00052: Galactose metabolism; ko01100: Metabolic pathways	uncharacterized protein LOC123211033 [Mangifera indica]	STSYN_PEA RecName: Full=Stachyose synthase; EC=2.4.1.67; AltName: Full=Galactinol--raffinose galactosyltransferase; Flags: Precursor;	V4VVB8_CITCL SubName: Full=Uncharacterized protein {ECO:0000313|EMBL:ESR57204.1};	--	GO:0005737,cytoplasm; GO:0047268,galactinol-raffinose galactosyltransferase activity; GO:0009312,oligosaccharide biosynthetic process; GO:0033532,stachyose biosynthetic process; GO:0003674,molecular_function; GO:0003824,catalytic activity; GO:0008378,galactosyltransferase activity; GO:0016740,transferase activity; GO:0016757,glycosyltransferase activity; GO:0016758,hexosyltransferase activity; GO…	--	--	--	--
LOC123203781	145	184	106	14	9	10	8.8119	13.7904	5.7994	0.8383	0.5608	0.7293	9.46723333333333	0.709466666666667	-3.73814	2.23753728323916e-12	2.0114774579938e-10	NC_058155.1	8708822	8709500	+	LOC123203781	--	--	--	--	--	--	--	--	--	--	--	--
LOC123222413	12048	10056	11332	3118	2749	2837	471.033	484.864	398.858	120.105	110.193	133.116	451.585066666667	121.138066666667	-1.89835	2.25927232354718e-12	2.02483705275893e-10	NC_058137.1	24518032	24519036	-	LOC123222413	--	--	--	heme-binding protein 2 [Mangifera indica]	--	A0A2H5QL77_CITUN SubName: Full=Uncharacterized protein {ECO:0000313|EMBL:GAY65380.1};	--	GO:0110165,cellular anatomical entity; GO:0005575,cellular_component	PF04832.15:SOUL heme-binding protein	--	--	--
LOC123216979	526	449	745	187	130	137	9.924	10.4473	12.6541	3.4761	2.5147	3.1021	11.0084666666667	3.03096666666667	-1.86076	2.26494647552435e-12	2.02483705275893e-10	NC_058141.1	19008137	19011757	-	LOC123216979	--	--	--	proline iminopeptidase isoform X1 [Mangifera indica]	--	A0A5C7I1I9_9ROSI RecName: Full=AB hydrolase-1 domain-containing protein {ECO:0000259|Pfam:PF00561};	--	--	PF00561.23:alpha/beta hydrolase fold	--	--	--
LOC123201023	4724	4131	7548	1713	1220	1412	124.979	134.785	179.777	44.6512	33.0926	44.8328	146.513666666667	40.8588666666667	-1.84231	2.38651961870737e-12	2.12762838824704e-10	NC_058153.1	4361473	4363713	+	LOC123201023	--	K13464 jasmonate ZIM domain-containing protein | (RefSeq) protein TIFY 10A-like isoform X1 (A)	ko04075: Plant hormone signal transduction	protein TIFY 10A-like isoform X1 [Mangifera indica]	TI10A_ARATH RecName: Full=Protein TIFY 10A {ECO:0000303|PubMed:17499004}; AltName: Full=Jasmonate ZIM domain-containing protein 1 {ECO:0000303|PubMed:17637675, ECO:0000303|PubMed:19151223};	V4UP38_CITCL RecName: Full=Tify domain-containing protein {ECO:0000259|PROSITE:PS51320};	--	GO:0005634,nucleus; GO:0005886,plasma membrane; GO:0042802,identical protein binding; GO:0042742,defense response to bacterium; GO:0009908,flower development; GO:0009867,jasmonic acid mediated signaling pathway; GO:0009555,pollen development; GO:1900067,regulation of cellular response to alkaline pH; GO:0031347,regulation of defense response; GO:2000022,regulation of jasmonic acid mediated signal…	PF06200.17:tify domain	Tify	TF	Tify
LOC123225974	423	893	3310	77	82	32	20.7298	53.9715	146.035	3.7179	4.1201	1.8821	73.5788666666667	3.24003333333333	-4.50521	2.39606378351902e-12	2.13025252026196e-10	NC_058145.1	11852867	11853584	+	LOC123225974	--	K13993 HSP20 family protein | (RefSeq) 18.2 kDa class I heat shock protein-like (A)	ko04141: Protein processing in endoplasmic reticulum	18.2 kDa class I heat shock protein-like [Mangifera indica]	HSP12_MEDSA RecName: Full=18.2 kDa class I heat shock protein;	A0A0H3UZ51_MANIN SubName: Full=Heat-shock protein 17.6 {ECO:0000313|EMBL:AJA79008.1};	Molecular chaperone (small heat-shock protein Hsp26/Hsp42)	GO:0005737,cytoplasm; GO:0005575,cellular_component; GO:0005622,intracellular anatomical structure; GO:0110165,cellular anatomical entity	PF00011.24:Hsp20/alpha crystallin family	--	--	--
LOC123200851	1634	1719	1648	433	328	374	42.6521	55.338	38.7277	11.1359	8.7782	11.7164	45.5726	10.5435	-2.11181	2.48013698379055e-12	2.19894123290858e-10	NC_058153.1	2097769	2101275	-	LOC123200851	--	--	--	methyl-CpG-binding domain-containing protein 10-like isoform X1 [Mangifera indica]	MBD10_ARATH RecName: Full=Methyl-CpG-binding domain-containing protein 10; Short=AtMBD10; Short=MBD10; AltName: Full=Methyl-CpG-binding protein MBD10;	A0A5B6YQ15_DAVIN SubName: Full=Putative methyl-CpG-binding domain-containing protein 11 isoform X1 {ECO:0000313|EMBL:MPA33801.1};	--	GO:0005829,cytosol; GO:0005634,nucleus; GO:0008327,methyl-CpG binding; GO:0000166,nucleotide binding; GO:0003674,molecular_function; GO:0003676,nucleic acid binding; GO:0003677,DNA binding; GO:0005488,binding; GO:0036094,small molecule binding; GO:0043565,sequence-specific DNA binding; GO:0097159,organic cyclic compound binding; GO:1901265,nucleoside phosphate binding; GO:1901363,heterocyclic com…	PF01429.22:Methyl-CpG binding domain	--	--	--
LOC123215582	507	292	510	55	87	56	11.901	8.4532	10.7776	1.272	2.0938	1.5776	10.3772666666667	1.6478	-2.65481	2.57592316374808e-12	2.27761008941485e-10	NC_058137.1	19700749	19702247	+	LOC123215582	--	--	--	uncharacterized protein LOC123215582 [Mangifera indica]	--	A0A067GTN4_CITSI SubName: Full=Uncharacterized protein {ECO:0000313|EMBL:KDO78782.1};	--	--	--	--	--	--
LOC123213993	212	239	212	2552	2245	1140	3.6124	5.0224	3.2521	42.8438	39.2211	23.313	3.9623	35.1259666666667	3.1481279077384	2.74345673389206e-12	2.41911418505187e-10	NC_058140.1	17138361	17142402	+	LOC123213993	--	K11594 ATP-dependent RNA helicase DDX3X [EC:3.6.4.13] | (RefSeq) DEAD-box ATP-dependent RNA helicase 37-like (A)	--	DEAD-box ATP-dependent RNA helicase 22 isoform X1 [Mangifera indica]	RH22_ARATH RecName: Full=DEAD-box ATP-dependent RNA helicase 22; EC=3.6.4.13;	A0A5C7HHK2_9ROSI SubName: Full=Uncharacterized protein {ECO:0000313|EMBL:TXG56364.1};	U5 snRNP-like RNA helicase subunit	GO:0009507,chloroplast; GO:0005524,ATP binding; GO:0016887,ATP hydrolysis activity; GO:0003729,mRNA binding; GO:0003723,RNA binding; GO:0003724,RNA helicase activity; GO:0000166,nucleotide binding; GO:0003674,molecular_function; GO:0005488,binding; GO:0017076,purine nucleotide binding; GO:0030554,adenyl nucleotide binding; GO:0032553,ribonucleotide binding; GO:0032555,purine ribonucleotide bindin…	PF00270.32:DEAD/DEAH box helicase	--	--	--
LOC123209016	41	26	60	567	558	1597	0.3984	0.3116	0.5249	5.4285	5.5594	18.6247	0.411633333333333	9.87086666666667	4.58374504058895	2.80639833598936e-12	2.46787175742192e-10	NC_058138.1	24062582	24071463	-	LOC123209016	--	K01115 phospholipase D1/2 [EC:3.1.4.4] | (RefSeq) phospholipase D zeta 2-like isoform X1 (A)	ko00564: Glycerophospholipid metabolism; ko00565: Ether lipid metabolism; ko01100: Metabolic pathways; ko01110: Biosynthesis of secondary metabolites; ko04144: Endocytosis	phospholipase D zeta 2-like isoform X1 [Mangifera indica]	PLDZ1_ARATH RecName: Full=Phospholipase D zeta 1 {ECO:0000303|PubMed:11891260}; Short=PLDzeta1 {ECO:0000303|PubMed:11891260}; EC=3.1.4.4 {ECO:0000269|PubMed:11891260}; AltName: Full=Phospholipase D p1; Short=AtPLDp1; AltName: Full=Phospholipase D1 PHOX and PX-containing domain protein;	V4TAV1_CITCL RecName: Full=Phospholipase {ECO:0000256|PIRNR:PIRNR009376}; EC=3.1.4.4 {ECO:0000256|PIRNR:PIRNR009376};	Phospholipase D1	GO:0031410,cytoplasmic vesicle; GO:0005886,plasma membrane; GO:0070290,N-acylphosphatidylethanolamine-specific phospholipase D activity; GO:0004630,phospholipase D activity; GO:0048017,inositol lipid-mediated signaling; GO:0008610,lipid biosynthetic process; GO:0006654,phosphatidic acid biosynthetic process; GO:0009395,phospholipid catabolic process; GO:0048364,root development; GO:0003674,molecu…	PF00614.25:Phospholipase D Active site motif	--	--	--
LOC123229382	1262	1071	1707	131	171	242	35.6958	37.36	43.4678	3.6507	4.9591	8.215	38.8412	5.60826666666667	-2.79196	2.85079838587834e-12	2.50010370400684e-10	NC_058147.1	1252629	1253872	-	LOC123229382	--	K13448 calcium-binding protein CML | (RefSeq) calcium-binding protein CML39-like (A)	ko04626: Plant-pathogen interaction	calcium-binding protein CML39-like [Mangifera indica]	CML37_ARATH RecName: Full=Calcium-binding protein CML37 {ECO:0000303|Ref.5}; AltName: Full=Calmodulin-like protein 37 {ECO:0000303|Ref.5};	A0A5C7H519_9ROSI SubName: Full=Uncharacterized protein {ECO:0000313|EMBL:TXG51829.1};	Calmodulin and related proteins (EF-Hand superfamily)	GO:0005737,cytoplasm; GO:0005634,nucleus; GO:0005509,calcium ion binding; GO:0030234,enzyme regulator activity; GO:0071456,cellular response to hypoxia; GO:0010193,response to ozone; GO:0003674,molecular_function; GO:0005488,binding; GO:0043167,ion binding; GO:0043169,cation binding; GO:0046872,metal ion binding; GO:0098772,molecular function regulator activity; GO:0001666,response to hypoxia; GO…	PF13833.9:EF-hand domain pair	--	--	--
LOC123216914	367	431	725	26	20	59	11.6653	16.8953	20.7465	0.8142	0.6518	2.2507	16.4357	1.2389	-3.7297	2.91011131178408e-12	2.54520385813571e-10	NC_058137.1	1142749	1143935	-	LOC123216914	--	--	--	uncharacterized protein LOC123216914 [Mangifera indica]	--	V4SV02_CITCL SubName: Full=Uncharacterized protein {ECO:0000313|EMBL:ESR42835.1};	--	GO:0016021,integral component of membrane; GO:0005575,cellular_component; GO:0016020,membrane; GO:0031224,intrinsic component of membrane; GO:0110165,cellular anatomical entity	PF04654.15:Protein of unknown function, DUF599	--	--	--
LOC123203062	114	68	126	1	5	0	3.8276	2.8157	3.8086	0.0331	0.1721	0	3.48396666666667	0.0684	-5.67059	3.05627534497741e-12	2.66581551914746e-10	NC_058155.1	8484990	8486037	+	LOC123203062	--	K09286 EREBP-like factor | (RefSeq) ethylene-responsive transcription factor ERF010-like (A)	--	ethylene-responsive transcription factor ERF014-like [Mangifera indica]	ERF12_ARATH RecName: Full=Ethylene-responsive transcription factor ERF012; AltName: Full=Dehydration response element-binding protein 26 {ECO:0000303|PubMed:21069430};	A0A2H5NNJ1_CITUN RecName: Full=AP2/ERF domain-containing protein {ECO:0000259|PROSITE:PS51032};	--	GO:0005634,nucleus; GO:0003700,DNA-binding transcription factor activity; GO:0000976,transcription cis-regulatory region binding; GO:0071497,cellular response to freezing; GO:0034605,cellular response to heat; GO:0009873,ethylene-activated signaling pathway; GO:0045893,positive regulation of DNA-templated transcription; GO:0009753,response to jasmonic acid; GO:0009751,response to salicylic acid; …	PF00847.23:AP2 domain	AP2/ERF-ERF	TF	AP2/ERF->AP2/ERF-ERF
LOC123217170	951	1021	1257	239	227	263	14.1073	18.6788	16.7871	3.4931	3.4525	4.6822	16.5244	3.87593333333333	-2.09198	3.13742459450997e-12	2.72922113042103e-10	NC_058141.1	14633121	14637030	+	LOC123217170	--	--	--	F-box/kelch-repeat protein At3g24760 [Mangifera indica]	FBK69_ARATH RecName: Full=F-box/kelch-repeat protein At3g24760;	A0A5C7I628_9ROSI RecName: Full=F-box domain-containing protein {ECO:0000259|PROSITE:PS50181};	--	GO:0005737,cytoplasm; GO:0004842,ubiquitin-protein transferase activity; GO:0031146,SCF-dependent proteasomal ubiquitin-dependent protein catabolic process; GO:0003674,molecular_function; GO:0003824,catalytic activity; GO:0016740,transferase activity; GO:0019787,ubiquitin-like protein transferase activity; GO:0140096,catalytic activity, acting on a protein; GO:0006508,proteolysis; GO:0006511,ubiq…	PF13964.9:Kelch motif	--	--	--
LOC123196420	1761	660	2801	258	159	165	25.51	11.7911	36.5292	3.6823	2.3615	2.8686	24.6101	2.9708	-3.05033	3.15266712551002e-12	2.73510822961249e-10	NC_058150.1	10138018	10144643	-	LOC123196420	--	K08150 MFS transporter, SP family, solute carrier family 2 (myo-inositol transporter), member 13 | (RefSeq) inositol transporter 1 isoform X1 (A)	--	inositol transporter 1 isoform X2 [Mangifera indica]	INT1_ARATH RecName: Full=Inositol transporter 1;	A0A067DPH8_CITSI RecName: Full=MFS domain-containing protein {ECO:0000259|PROSITE:PS50850};	Predicted transporter (major facilitator superfamily)	GO:0005829,cytosol; GO:0016021,integral component of membrane; GO:0000325,plant-type vacuole; GO:0009705,plant-type vacuole membrane; GO:0005366,myo-inositol:proton symporter activity; GO:0015798,myo-inositol transport; GO:0003674,molecular_function; GO:0005215,transporter activity; GO:0005365,myo-inositol transmembrane transporter activity; GO:0008324,cation transmembrane transporter activity; G…	PF00083.27:Sugar (and other) transporter	--	--	--
LOC123199605	118	130	161	2474	1288	730	1.1762	1.5981	1.4448	24.297	13.1633	8.733	1.40636666666667	15.3977666666667	3.45267642700685	3.30808607358402e-12	2.86224830704496e-10	NC_058152.1	10784252	10793430	+	LOC123199605	--	K14521 N-acetyltransferase 10 [EC:2.3.1.-] | (RefSeq) RNA cytidine acetyltransferase 1-like (A)	ko03008: Ribosome biogenesis in eukaryotes	RNA cytidine acetyltransferase 1-like [Mangifera indica]	NT101_ARATH RecName: Full=RNA cytidine acetyltransferase 1 {ECO:0000255|HAMAP-Rule:MF_03211}; EC=2.3.1.- {ECO:0000255|HAMAP-Rule:MF_03211}; AltName: Full=18S rRNA cytosine acetyltransferase 1 {ECO:0000255|HAMAP-Rule:MF_03211};	V4SQM1_CITCL RecName: Full=RNA cytidine acetyltransferase {ECO:0000256|HAMAP-Rule:MF_03211}; EC=2.3.1.- {ECO:0000256|HAMAP-Rule:MF_03211}; AltName: Full=18S rRNA cytosine acetyltransferase {ECO:0000256|HAMAP-Rule:MF_03211};	Predicted P-loop ATPase fused to an acetyltransferase	GO:0005730,nucleolus; GO:0005524,ATP binding; GO:1990883,rRNA cytidine N-acetyltransferase activity; GO:0000049,tRNA binding; GO:1904812,rRNA acetylation involved in maturation of SSU-rRNA; GO:0051391,tRNA acetylation; GO:0000166,nucleotide binding; GO:0003674,molecular_function; GO:0005488,binding; GO:0017076,purine nucleotide binding; GO:0030554,adenyl nucleotide binding; GO:0032553,ribonucleot…	PF13718.9:GNAT acetyltransferase 2	--	--	--
LOC123227172	4	3	4	213	99	75	0.0752	0.0695	0.0677	3.9446	1.9079	1.6919	0.0708	2.5148	5.15055049769546	3.35610067557045e-12	2.88982816215397e-10	NC_058146.1	17057023	17062468	-	LOC123227172	--	K03595 GTPase | (RefSeq) GTP-binding protein ERG-like (A)	--	GTP-binding protein ERG-like [Mangifera indica]	ERG_ARATH RecName: Full=GTP-binding protein ERG;	V4W6U9_CITCL SubName: Full=Uncharacterized protein {ECO:0000313|EMBL:ESR61854.1};	Ras-like GTPase ERA	GO:0005739,mitochondrion; GO:0005525,GTP binding; GO:0097177,mitochondrial ribosome binding; GO:0043024,ribosomal small subunit binding; GO:0019843,rRNA binding; GO:0000028,ribosomal small subunit assembly; GO:0000166,nucleotide binding; GO:0003674,molecular_function; GO:0005488,binding; GO:0017076,purine nucleotide binding; GO:0019001,guanyl nucleotide binding; GO:0032553,ribonucleotide binding;…	PF01926.26:50S ribosome-binding GTPase	--	--	--
LOC123203755	129	214	171	1965	1294	1336	2.1381	4.3742	2.5515	32.0878	21.9891	26.5748	3.02126666666667	26.8839	3.15351701084553	3.35787054444191e-12	2.88982816215397e-10	NC_058155.1	12177098	12180074	-	LOC123203755	--	K14798 protein LTV1 | (RefSeq) protein LTV1 homolog (A)	--	protein LTV1 homolog [Mangifera indica]	--	A0A5C7H576_9ROSI SubName: Full=Uncharacterized protein {ECO:0000313|EMBL:TXG52134.1};	Uncharacterized conserved protein	GO:0016021,integral component of membrane; GO:0042274,ribosomal small subunit biogenesis; GO:0008150,biological_process; GO:0009987,cellular process; GO:0022613,ribonucleoprotein complex biogenesis; GO:0042254,ribosome biogenesis; GO:0044085,cellular component biogenesis; GO:0071840,cellular component organization or biogenesis; GO:0005575,cellular_component; GO:0016020,membrane; GO:0031224,intri…	PF04180.17:Low temperature viability protein	--	--	--
LOC123200657	3521	2707	3818	697	417	728	124.141	117.705	121.188	24.212	15.074	30.8045	121.011266666667	23.3635	-2.37281	3.54004180767538e-12	3.03850450157201e-10	NC_058153.1	7068991	7071734	+	LOC123200657	--	K26214 transcription factor FER-LIKE IRON | (RefSeq) transcription factor FER-LIKE IRON DEFICIENCY-INDUCED TRANSCRIPTION FACTOR (A)	--	transcription factor bHLH35-like [Mangifera indica]	BH035_ARATH RecName: Full=Transcription factor bHLH35; AltName: Full=Basic helix-loop-helix protein 35; Short=AtbHLH35; Short=bHLH 35; AltName: Full=Transcription factor EN 41; AltName: Full=bHLH transcription factor bHLH035;	V4UJY2_CITCL RecName: Full=BHLH domain-containing protein {ECO:0000259|PROSITE:PS50888};	--	GO:0005634,nucleus; GO:0003700,DNA-binding transcription factor activity; GO:0046983,protein dimerization activity; GO:0043565,sequence-specific DNA binding; GO:0006355,regulation of DNA-templated transcription; GO:0003674,molecular_function; GO:0140110,transcription regulator activity; GO:0005488,binding; GO:0005515,protein binding; GO:0003676,nucleic acid binding; GO:0003677,DNA binding; GO:009…	PF00010.29:Helix-loop-helix DNA-binding domain	bHLH	TF	bHLH
LOC123215053	607	575	714	3517	4410	2960	12.3745	14.4565	13.1042	70.6414	92.1766	72.4209	13.3117333333333	78.4129666666667	2.55839380545086	3.59622005950069e-12	3.07853607374711e-10	NC_058140.1	20640642	20643555	-	LOC123215053	--	K09841 xanthoxin dehydrogenase [EC:1.1.1.288] | (RefSeq) zerumbone synthase isoform X1 (A)	ko00906: Carotenoid biosynthesis; ko01100: Metabolic pathways; ko01110: Biosynthesis of secondary metabolites	zerumbone synthase isoform X1 [Mangifera indica]	BDH2_SALOF RecName: Full=(+)-borneol dehydrogenase 2 {ECO:0000303|PubMed:31927319}; Short=SoBDH2 {ECO:0000303|PubMed:31927319}; EC=1.1.1.198 {ECO:0000269|PubMed:31927319};	V4SWC6_CITCL SubName: Full=Uncharacterized protein {ECO:0000313|EMBL:ESR41486.1};	Reductases with broad range of substrate specificities	GO:0016616,oxidoreductase activity, acting on the CH-OH group of donors, NAD or NADP as acceptor; GO:0003674,molecular_function; GO:0003824,catalytic activity; GO:0016491,oxidoreductase activity; GO:0016614,oxidoreductase activity, acting on CH-OH group of donors	PF13561.9:Enoyl-(Acyl carrier protein) reductase	--	--	--
LOC123225914	522	501	782	4585	3596	2225	6.9025	8.1702	9.3093	59.7341	48.7526	35.31	8.12733333333333	47.9322333333333	2.56014219073573	3.90247063187971e-12	3.32729502782343e-10	NC_058145.1	9658570	9663902	+	LOC123225914	--	K11594 ATP-dependent RNA helicase DDX3X [EC:3.6.4.13] | (RefSeq) DEAD-box ATP-dependent RNA helicase 37-like (A)	--	DEAD-box ATP-dependent RNA helicase 37-like [Mangifera indica]	RH37_ARATH RecName: Full=DEAD-box ATP-dependent RNA helicase 37; EC=3.6.4.13;	A0A6P3ZGZ0_ZIZJJ RecName: Full=RNA helicase {ECO:0000256|ARBA:ARBA00012552}; EC=3.6.4.13 {ECO:0000256|ARBA:ARBA00012552};	ATP-dependent RNA helicase	GO:0005829,cytosol; GO:0005634,nucleus; GO:0005777,peroxisome; GO:0005524,ATP binding; GO:0016887,ATP hydrolysis activity; GO:0003729,mRNA binding; GO:0003723,RNA binding; GO:0003724,RNA helicase activity; GO:0000166,nucleotide binding; GO:0003674,molecular_function; GO:0005488,binding; GO:0017076,purine nucleotide binding; GO:0030554,adenyl nucleotide binding; GO:0032553,ribonucleotide binding; …	PF00270.32:DEAD/DEAH box helicase	--	--	--
LOC123230222	887	270	757	41	73	24	21.614	8.114	16.6067	0.9843	1.8238	0.7019	15.4449	1.17	-3.72255	3.91377640651104e-12	3.32729502782343e-10	NC_058147.1	529637	532732	+	LOC123230222	--	K00121 S-(hydroxymethyl)glutathione dehydrogenase / alcohol dehydrogenase [EC:1.1.1.284 1.1.1.1] | (RefSeq) alcohol dehydrogenase-like 7 (A)	ko00010: Glycolysis / Gluconeogenesis; ko00071: Fatty acid degradation; ko00350: Tyrosine metabolism; ko00620: Pyruvate metabolism; ko01100: Metabolic pathways; ko01110: Biosynthesis of secondary metabolites; ko01200: Carbon metabolism	alcohol dehydrogenase-like 7 [Mangifera indica]	ADHL7_ARATH RecName: Full=Alcohol dehydrogenase-like 7; EC=1.1.1.1 {ECO:0000250|UniProtKB:P06525};	V4TAH5_CITCL SubName: Full=Uncharacterized protein {ECO:0000313|EMBL:ESR48550.1};	Alcohol dehydrogenase, class III	GO:0005829,cytosol; GO:0004024,alcohol dehydrogenase activity, zinc-dependent; GO:0051903,S-(hydroxymethyl)glutathione dehydrogenase activity; GO:0008270,zinc ion binding; GO:0046294,formaldehyde catabolic process; GO:0003674,molecular_function; GO:0003824,catalytic activity; GO:0004022,alcohol dehydrogenase (NAD+) activity; GO:0016491,oxidoreductase activity; GO:0016614,oxidoreductase activity, …	PF08240.15:Alcohol dehydrogenase GroES-like domain	--	--	--
LOC123196309	286	337	276	4097	2182	1891	2.3263	3.3805	2.021	32.8327	18.1966	18.4594	2.57593333333333	23.1629	3.16865	3.91773962932762e-12	3.32729502782343e-10	NC_058150.1	2179856	2189752	+	LOC123196309	--	K14569 ribosome biogenesis protein BMS1 | (RefSeq) ribosome biogenesis protein bms1 isoform X1 (A)	ko03008: Ribosome biogenesis in eukaryotes	ribosome biogenesis protein bms1 isoform X1 [Mangifera indica]	--	V4T7C7_CITCL RecName: Full=Bms1-type G domain-containing protein {ECO:0000259|PROSITE:PS51714};	GTP-binding protein AARP2 involved in 40S ribosome biogenesis	GO:0005730,nucleolus; GO:0005525,GTP binding; GO:0042254,ribosome biogenesis; GO:0000166,nucleotide binding; GO:0003674,molecular_function; GO:0005488,binding; GO:0017076,purine nucleotide binding; GO:0019001,guanyl nucleotide binding; GO:0032553,ribonucleotide binding; GO:0032555,purine ribonucleotide binding; GO:0032561,guanyl ribonucleotide binding; GO:0035639,purine ribonucleoside triphosphat…	PF04950.15:40S ribosome biogenesis protein Tsr1 and BMS1 C-terminal	--	--	--
LOC123216885	262	191	230	6791	4228	1249	3.972	3.571	3.1391	101.435	65.7178	22.7248	3.5607	63.2924	4.15179948027431	4.08277959630176e-12	3.45836078507734e-10	NC_058141.1	13573737	13577736	-	LOC123216885	--	K00036 glucose-6-phosphate 1-dehydrogenase [EC:1.1.1.49 1.1.1.363] | (RefSeq) glucose-6-phosphate 1-dehydrogenase, chloroplastic-like (A)	ko00030: Pentose phosphate pathway; ko00480: Glutathione metabolism; ko01100: Metabolic pathways; ko01110: Biosynthesis of secondary metabolites; ko01200: Carbon metabolism	glucose-6-phosphate 1-dehydrogenase, chloroplastic-like [Mangifera indica]	G6PDC_SOLTU RecName: Full=Glucose-6-phosphate 1-dehydrogenase, chloroplastic; Short=G6PD; EC=1.1.1.49 {ECO:0000269|PubMed:9341136}; Flags: Precursor;	A0A1Q3CG48_CEPFO RecName: Full=Glucose-6-phosphate 1-dehydrogenase {ECO:0000256|RuleBase:RU362120}; EC=1.1.1.49 {ECO:0000256|RuleBase:RU362120};	Glucose-6-phosphate 1-dehydrogenase	GO:0009507,chloroplast; GO:0004345,glucose-6-phosphate dehydrogenase activity; GO:0050661,NADP binding; GO:0006006,glucose metabolic process; GO:0009051,pentose-phosphate shunt, oxidative branch; GO:0003674,molecular_function; GO:0003824,catalytic activity; GO:0016491,oxidoreductase activity; GO:0016614,oxidoreductase activity, acting on CH-OH group of donors; GO:0016616,oxidoreductase activity, …	PF02781.19:Glucose-6-phosphate dehydrogenase, C-terminal domain	--	--	--
LOC123193734	14	26	19	265	247	341	0.2513	0.5756	0.3071	4.6872	4.5464	7.347	0.378	5.52686666666667	3.87000366900194	4.31398632044232e-12	3.64464085129935e-10	NC_058148.1	7982842	7984801	+	LOC123193734	--	--	--	pentatricopeptide repeat-containing protein At5g48910-like [Mangifera indica]	PP425_ARATH RecName: Full=Pentatricopeptide repeat-containing protein At5g48910;	A0A6J1A792_9ROSI SubName: Full=pentatricopeptide repeat-containing protein At4g21065-like {ECO:0000313|RefSeq:XP_021283017.1};	FOG: PPR repeat	GO:0009507,chloroplast; GO:0003729,mRNA binding; GO:0008270,zinc ion binding; GO:0009451,RNA modification; GO:0003674,molecular_function; GO:0003676,nucleic acid binding; GO:0003723,RNA binding; GO:0005488,binding; GO:0097159,organic cyclic compound binding; GO:1901363,heterocyclic compound binding; GO:0043167,ion binding; GO:0043169,cation binding; GO:0046872,metal ion binding; GO:0046914,transi…	PF14432.9:DYW family of nucleic acid deaminases	--	--	--
LOC123201081	130	128	152	1159	988	578	5.1224	6.2201	5.392	44.9945	39.9143	27.3331	5.57816666666667	37.4139666666667	2.74571398445302	4.52951933736224e-12	3.81674092884313e-10	NC_058153.1	201337	203532	-	LOC123201081	--	--	--	phosphopantothenoylcysteine decarboxylase subunit SIS2-like [Mangifera indica]	--	A0A1S8ACN9_CITLI SubName: Full=Uncharacterized protein {ECO:0000313|EMBL:JAV45185.1};	--	--	--	--	--	--
LOC123225364	82	124	47	1693	1870	1028	3.6756	6.8547	1.8966	74.7679	85.9399	55.3014	4.1423	72.0030666666667	4.11955440584201	4.54977563476836e-12	3.82382575679373e-10	NC_058145.1	10900946	10902228	+	LOC123225364	--	--	--	uncharacterized protein LOC123225364 [Mangifera indica]	--	V4U5K3_CITCL SubName: Full=Uncharacterized protein {ECO:0000313|EMBL:ESR59370.1};	--	--	--	--	--	--
LOC123230213	207	216	387	6464	3262	1456	4.3719	5.6262	7.3585	134.51	70.6369	36.9062	5.78553333333333	80.6843	3.8017661092768	4.77331044829954e-12	4.00127397657068e-10	NC_058147.1	13180962	13184439	+	LOC123230213	--	K03233 elongation factor 1-gamma | (RefSeq) elongation factor 1-gamma-like (A)	--	elongation factor 1-gamma-like [Mangifera indica]	EF1G_PRUAV RecName: Full=Elongation factor 1-gamma; Short=EF-1-gamma; AltName: Full=eEF-1B gamma;	F6I455_VITVI SubName: Full=Uncharacterized protein {ECO:0000313|EMBL:CCB61635.1};	Glutathione S-transferase	GO:0004364,glutathione transferase activity; GO:0003746,translation elongation factor activity; GO:0006749,glutathione metabolic process; GO:0042221,response to chemical; GO:0003674,molecular_function; GO:0003824,catalytic activity; GO:0016740,transferase activity; GO:0016765,transferase activity, transferring alkyl or aryl (other than methyl) groups; GO:0003676,nucleic acid binding; GO:0005488,b…	PF00647.22:Elongation factor 1 gamma, conserved domain	--	--	--
LOC123194438	804	113	886	13	12	28	17.0013	2.9469	16.8669	0.2708	0.2602	0.7106	12.2717	0.413866666666667	-4.89003	4.81431214293471e-12	4.02518901007596e-10	NC_058149.1	14574940	14576900	+	LOC123194438	--	K22683 aspartyl protease family protein [EC:3.4.23.-] | (RefSeq) aspartyl protease family protein 2-like (A)	--	aspartyl protease family protein At5g10770-like [Mangifera indica]	ASPA_ARATH RecName: Full=Aspartyl protease family protein At5g10770; EC=3.4.23.- {ECO:0000305}; Flags: Precursor;	A0A067FIY7_CITSI RecName: Full=Peptidase A1 domain-containing protein {ECO:0000259|PROSITE:PS51767};	Aspartyl protease	GO:0031225,anchored component of membrane; GO:0005886,plasma membrane; GO:0004190,aspartic-type endopeptidase activity; GO:0006508,proteolysis; GO:0003674,molecular_function; GO:0003824,catalytic activity; GO:0004175,endopeptidase activity; GO:0008233,peptidase activity; GO:0016787,hydrolase activity; GO:0070001,aspartic-type peptidase activity; GO:0140096,catalytic activity, acting on a protein;…	PF14543.9:Xylanase inhibitor N-terminal	--	--	--
LOC123195191	218	244	181	5	2	15	5.3048	7.3225	3.9652	0.1199	0.0499	0.4381	5.53083333333333	0.202633333333333	-4.77055	4.87583339325353e-12	4.06609227649796e-10	NC_058149.1	14578383	14579930	-	LOC123195191	--	--	--	aspartyl protease family protein At5g10770-like [Pistacia vera]	--	A0A5B6ZND3_DAVIN RecName: Full=Peptidase A1 domain-containing protein {ECO:0000259|PROSITE:PS51767};	--	GO:0004190,aspartic-type endopeptidase activity; GO:0006508,proteolysis; GO:0003674,molecular_function; GO:0003824,catalytic activity; GO:0004175,endopeptidase activity; GO:0008233,peptidase activity; GO:0016787,hydrolase activity; GO:0070001,aspartic-type peptidase activity; GO:0140096,catalytic activity, acting on a protein; GO:0006807,nitrogen compound metabolic process; GO:0008150,biological_…	--	--	--	--
[truncated: 6,159 more rows]

## Sheet: jhm24-vs-gqm24.filter.annot
id	jhm24-1_count	jhm24-2_count	jhm24-3_count	gqm24-1_count	gqm24-2_count	gqm24-3_count	jhm24-1_fpkm	jhm24-2_fpkm	jhm24-3_fpkm	gqm24-1_fpkm	gqm24-2_fpkm	gqm24-3_fpkm	jhm24_mean	gqm24_mean	log2(fc)	PValue	FDR	chr	start	end	strand	gene_name	gene_description	KEGG	KEGG pathway	NR	Swissprot	Tremble	KOG	GO	Pfam	TF-Family	TF-Category	TF-Classification
[truncated: 4,156 more rows]

## Sheet: jhmCK-vs-gqmCK.filter.ann
id	jhmCK-1_count	jhmCK-2_count	jhmCK-3_count	gqmCK-1_count	gqmCK-2_count	gqmCK-3_count	jhmCK-1_fpkm	jhmCK-2_fpkm	jhmCK-3_fpkm	gqmCK-1_fpkm	gqmCK-2_fpkm	gqmCK-3_fpkm	jhmCK_mean	gqmCK_mean	log2(fc)	PValue	FDR	chr	start	end	strand	gene_name	gene_description	KEGG	KEGG pathway	NR	Swissprot	Tremble	KOG	GO	Pfam	TF-Family	TF-Category	TF-Classification
[truncated: 7,948 more rows]

## Sheet: jhmCK-vs-jhm24.filter.annot
id	jhmCK-1_count	jhmCK-2_count	jhmCK-3_count	jhm24-1_count	jhm24-2_count	jhm24-3_count	jhmCK-1_fpkm	jhmCK-2_fpkm	jhmCK-3_fpkm	jhm24-1_fpkm	jhm24-2_fpkm	jhm24-3_fpkm	jhmCK_mean	jhm24_mean	log2(fc)	PValue	FDR	chr	start	end	strand	gene_name	gene_description	KEGG	KEGG pathway	NR	Swissprot	Tremble	KOG	GO	Pfam	TF-Family	TF-Category	TF-Classification
[truncated: 11,294 more rows]
