# Supplementary material for: Comparative transcriptomics unveils the role of DELLA protein GAIP-B in cold tolerance of mango (Mangifera indica L.)
Source: Research Square preprint supplement (doi:10.21203/rs.3.rs-8246574/v1), 2025-12-22
Supplement: Supplementary file 2 [file c0249d638004d776a72fafa2.docx]

Table S1 The primers sequences used in this study

| **Target Name** | **Sequence (5’ to 3’）** |  |
| --- | --- | --- |
| DELL_F3 | GGAGGAGAATAACGGTTCC | qRT-PCR |
| DELL_R3 | AGTTTCCAAGCGGAGGTAG |
| MG-EF1a-Q_F2 | TTGCCATACCTCTCACATTGCT |
| MG-EF1a-Q_R2 | TACCGGCATCACCATTCTTCAA |
| Nt-ACT7_F1 | TGGAACTGGAATGGTGAAG |
| Nt-ACT7_R1 | CCACATAGGCATCTTTCTGTC |
| Niben-GAI-gRT1 | AAACTTGAACAACTTGAGAgttttagagctagaaat | Gene editing of GAIP-B in *Nicotiana benthamiana* |
| Niben-GAI-AtU3dT1 | TCTCAAGTTGTTCAAGTTTTgaccaatggtgctttg |
| Niben-GAI-gRT2 | TTGCAACAGAGAGTAATAAAgttttagagctagaaat |
| Niben-GAI-AtU3bT2 | TTTATTACTCTCTGTTGCAATgaccaatgttgctcc |
| Niben-GAI-gRT3 | TCAGTATCATCATCGTCCACgttttagagctagaaat |
| Niben-GAI-AtU6-1T3 | GTGGACGATGATGATACTGACaatcactacttcgtct |
| Niben-GAI-gRT4 | ATCTCGGCCGGGTTCGATCgttttagagctagaaat |
| Niben-GAI-AtU6-29T4 | GATCGAACCCGGCCGAGATCaatctcttagtcgact |
| SIF | ggacagggtacccggggatccATGAAGAGAGAACACAAACAACTCGA | Subcellular localization of GAIP-B |
| SIF | taaagcagggcatgcctgcagTCAGTGAAACCGAACCGGTT |
| M13F | ACTGGCCGTCGTTTTAC |
| M13R | CAGGAAACAGCTATGAC |
